# Supplementary material for: Pseudo‐heterolepticity in Low‐Symmetry Metal‐Organic Cages
Source: PubMed Central journal article supplement (PMC9828238; doi:10.1002/anie.202212392), 2022-09-29
Supplement: ANIE-61-0-s001.pdf [file ANIE-61-0-s001.pdf]

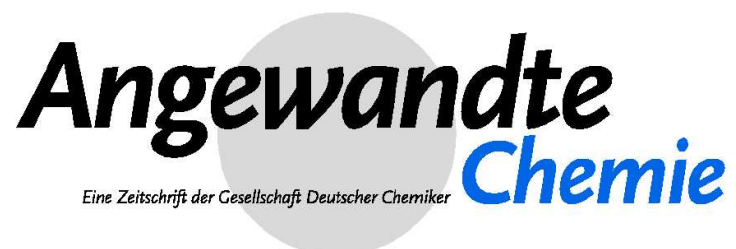

## Supporting Information

### **Pseudo-heterolepticity in Low-Symmetry Metal-Organic Cages**

*J. E. M. Lewis\**

## Contents

|                                                                                                                    |     |
|--------------------------------------------------------------------------------------------------------------------|-----|
| 1. General Experimental .....                                                                                      | 4   |
| 2. Synthetic Procedures .....                                                                                      | 5   |
| Synthesis of <b>S1</b> .....                                                                                       | 6   |
| Synthesis of <b>S2</b> .....                                                                                       | 9   |
| Synthesis of <b>L<sup>P4</sup></b> .....                                                                           | 10  |
| Synthesis of $[\text{Pd}_2(\text{L}^{\text{P4}})_2](\text{NO}_3)_4$ ( <b>C<sup>P4</sup></b> ) .....                | 13  |
| Synthesis of $[\text{Pd}_2(\text{L}^{\text{P4}})_2\text{Cl}](\text{BF}_4)_3$ .....                                 | 17  |
| Synthesis of <b>S3</b> .....                                                                                       | 19  |
| Synthesis of <b>S4</b> .....                                                                                       | 22  |
| Synthesis of <b>S5</b> .....                                                                                       | 25  |
| Synthesis of <b>S6</b> .....                                                                                       | 28  |
| Synthesis of <b>L<sup>P3Q</sup></b> .....                                                                          | 31  |
| Synthesis of $[\text{Pd}_2(\text{L}^{\text{P3Q}})_2\text{NO}_3](\text{NO}_3)_3$ ( <b>C<sup>P3Q</sup></b> ) .....   | 34  |
| Synthesis of <b>S7</b> .....                                                                                       | 40  |
| Synthesis of <b>L1<sup>Ph</sup></b> .....                                                                          | 43  |
| Synthesis of <i>cis</i> - $[\text{Pd}_2(\text{L1}^{\text{Ph}})_4](\text{BF}_4)_4$ ( <b>C1<sup>Ph</sup></b> ) ..... | 46  |
| Synthesis of <b>S8</b> .....                                                                                       | 51  |
| Synthesis of <b>S9</b> .....                                                                                       | 54  |
| Synthesis of <b>L1<sup>Xy</sup></b> .....                                                                          | 57  |
| Synthesis of <i>cis</i> - $[\text{Pd}_2(\text{L1}^{\text{Xy}})_4](\text{BF}_4)_4$ ( <b>C1<sup>Xy</sup></b> ) ..... | 60  |
| Synthesis of <b>S10</b> .....                                                                                      | 65  |
| Synthesis of <b>S11</b> .....                                                                                      | 68  |
| Synthesis of <b>S12</b> .....                                                                                      | 71  |
| Synthesis of <b>S13</b> .....                                                                                      | 74  |
| Synthesis of <b>S14</b> .....                                                                                      | 77  |
| Synthesis of <b>L1<sup>TIPS</sup></b> .....                                                                        | 80  |
| Synthesis of <b>L1<sup>CCH</sup></b> .....                                                                         | 83  |
| Synthesis of <b>L2<sup>Ph</sup></b> .....                                                                          | 86  |
| Synthesis of <i>cis</i> - $[\text{Pd}_3(\text{L2}^{\text{Ph}})_4](\text{BF}_4)_6$ ( <b>C2<sup>Ph</sup></b> ) ..... | 90  |
| Synthesis of <b>L2<sup>Xy</sup></b> .....                                                                          | 96  |
| Synthesis of <i>cis</i> - $[\text{Pd}_3(\text{L2}^{\text{Xy}})_4](\text{BF}_4)_6$ ( <b>C2<sup>Xy</sup></b> ) ..... | 100 |
| 3. Geometry Optimised Structures .....                                                                             | 106 |
| C2 <sup>Ph</sup> .....                                                                                             | 106 |
| C2 <sup>Xy</sup> .....                                                                                             | 113 |
| 4. Hydrodynamic Radii Calculations .....                                                                           | 121 |

|                                                                                                           |     |
|-----------------------------------------------------------------------------------------------------------|-----|
| 5. X-ray Crystallography .....                                                                            | 122 |
| <i>cis</i> -[Pd <sub>2</sub> (L <sup>xy</sup> ) <sub>4</sub> ](BF <sub>4</sub> ) <sub>4</sub> .....       | 122 |
| [Pd <sub>2</sub> (L <sup>P4</sup> ) <sub>2</sub> ⊃Cl](BF <sub>4</sub> ) <sub>3</sub> .....                | 124 |
| [Pd <sub>2</sub> (L <sup>P3Q</sup> ) <sub>2</sub> ⊃NO <sub>3</sub> ](NO <sub>3</sub> ) <sub>3</sub> ..... | 126 |
| 6. Chirality Assignment in C <sup>P3Q</sup> .....                                                         | 127 |
| 7. References .....                                                                                       | 128 |

## 1. General Experimental

**Synthesis:** Unless otherwise stated, all reagents, including anhydrous solvents, were purchased from commercial sources and used without further purification. All reactions were carried out under an atmosphere of N<sub>2</sub> using degassed, anhydrous solvents unless otherwise stated. Petrol refers to the fraction of petroleum ether boiling in the range 40-60 °C. Analytical TLC was performed on pre-coated silica gel plates (0.25 mm thick, 60F254, Merck, Germany) and observed under UV light. EDTA solution refers to a 0.1 M solution of EDTA-Na<sub>2</sub> in 3% NH<sub>3(aq)</sub>.

**Analysis:** NMR spectra were recorded on Bruker AV400 or AV500 instrument, at a constant temperature of 298 K. Chemical shifts are reported in parts per million from low to high field and referenced to residual solvent. Standard abbreviations indicating multiplicity were used as follows: m = multiplet, quint = quintet, q = quartet, t = triplet, d = doublet, s = singlet, app. = apparent, br. = broad. Chemical shifts are reported in parts per million (ppm) and referenced to residual solvent peaks (CDCl<sub>3</sub>: <sup>1</sup>H δ = 7.26 ppm, <sup>13</sup>C δ = 77.16 ppm; d<sub>6</sub>-DMSO: <sup>1</sup>H δ = 2.50 ppm, <sup>13</sup>C δ = 39.52 ppm; CD<sub>3</sub>OD: <sup>1</sup>H δ = 3.31 ppm, <sup>13</sup>C δ = 49.00 ppm). For **C2<sup>Ph</sup>** and **C2<sup>Xy</sup>** in d<sub>6</sub>-DMSO/CDCl<sub>3</sub> mixtures, spectra were referenced to d<sub>6</sub>-DMSO residual solvent peaks. Signal assignment was carried out using 2D NMR methods (HSQC, HMBC, COSY, NOESY) where necessary. In the case of some signals absolute assignment was not possible. Here indicative either/or assignments (e.g. H<sub>A</sub>/H<sub>B</sub> for H<sub>A</sub> or H<sub>B</sub>) are provided. Mass spectrometry was carried out by the Imperial College London, Department of Chemistry Mass Spectroscopy Service using Waters LCT Premier for HR-ESI-MS and Thermo Scientific Q-Exactive.



## 2. Synthetic Procedures

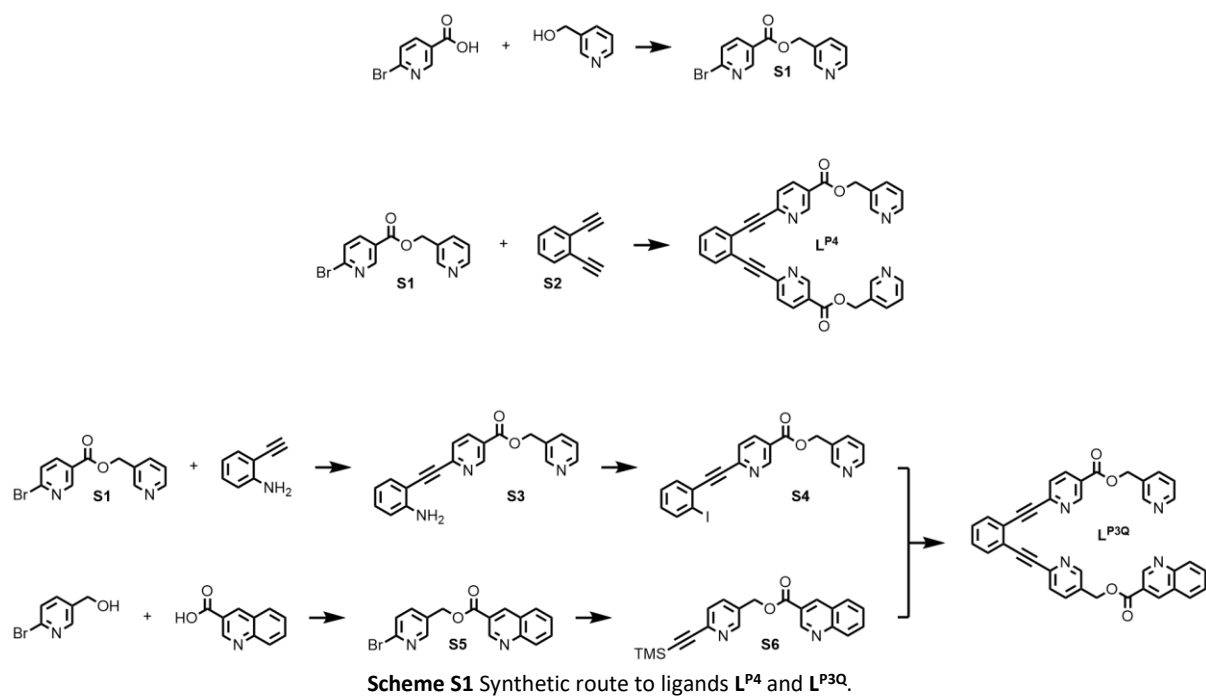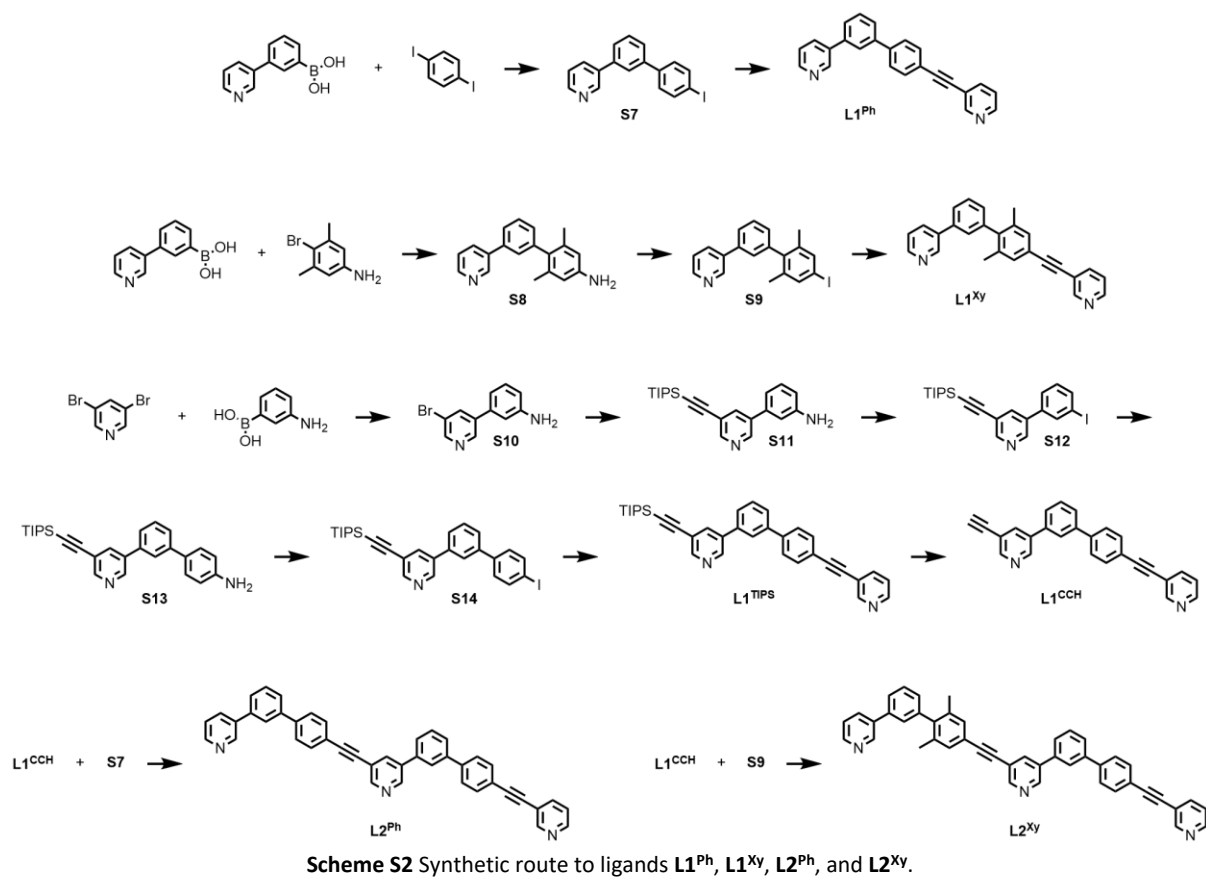

## Synthesis of S1

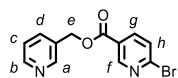

6-Bromonicotinic acid (1.01 g, 5 mmol, 1 eq.) was added portionwise to a stirring solution of EDCI·HCl (1.15 g, 6 mmol, 1.2 eq.) and DMAP (0.061 g, 0.5 mmol, 0.1 eq.) in CHCl<sub>3</sub> (25 mL) at 0 °C. After 30 minutes 3-pyridinemethanol (0.53 mL, 5.5 mmol, 1.1 eq.) was added dropwise via syringe and the reaction allowed to warm to rt. After 3 d the reaction mixture was washed with sat. aq. NaHCO<sub>3</sub> (25 mL), brine (25 mL), dried (MgSO<sub>4</sub>) and the solvent removed *in vacuo*. After purification by column chromatography on silica gel (1:4 acetone/CH<sub>2</sub>Cl<sub>2</sub>) the product was obtained as a white solid (1.46 g, 99%).

<sup>1</sup>H NMR (400 MHz, CDCl<sub>3</sub>) δ: 8.97 (d, *J* = 2.4 Hz, 1H, H<sub>f</sub>), 8.71 (s, 1H, H<sub>a</sub>), 8.62 (dd, *J* = 4.9, 1.6 Hz, 1H, H<sub>b</sub>), 8.12 (dd, *J* = 8.4, 2.4 Hz, 1H H<sub>g</sub>), 7.79 (app. dt, *J* = 7.9, 1.9 Hz, 1H, H<sub>d</sub>), 7.58 (d, *J* = 8.3 Hz, 1H, H<sub>h</sub>), 7.35 (dd, *J* = 7.9, 4.9 Hz, 1H, H<sub>c</sub>), 5.40 (s, 2H, H<sub>e</sub>).

<sup>13</sup>C NMR (101 MHz, CDCl<sub>3</sub>) δ: 164.4, 151.6 (C<sub>f</sub>), 150.0 (C<sub>b</sub>), 149.8 (C<sub>a</sub>), 147.4, 139.3 (C<sub>g</sub>), 136.6 (C<sub>d</sub>), 131.1, 128.3 (C<sub>h</sub>), 125.0, 123.8 (C<sub>c</sub>), 64.9 (C<sub>e</sub>).

HR-ESI-MS *m/z* = 292.9936 [M+H]<sup>+</sup> calc. 292.9926.

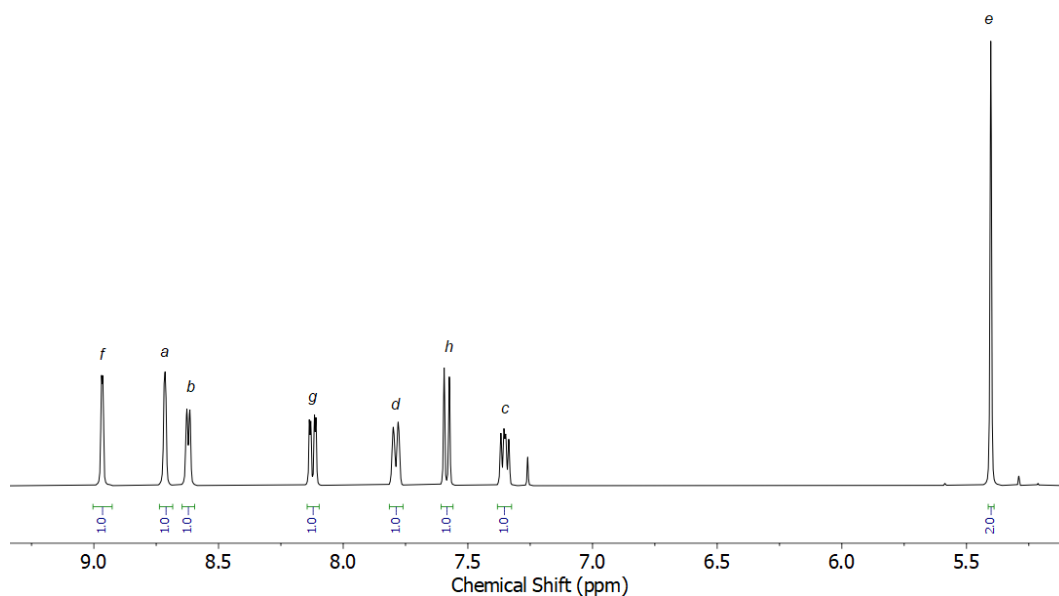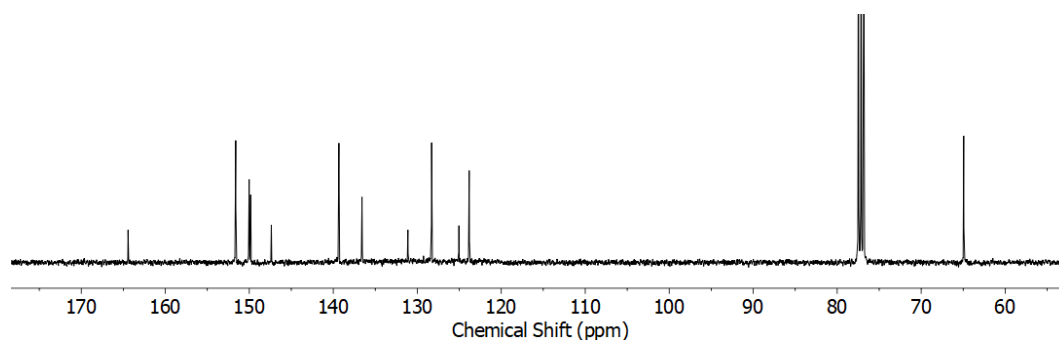

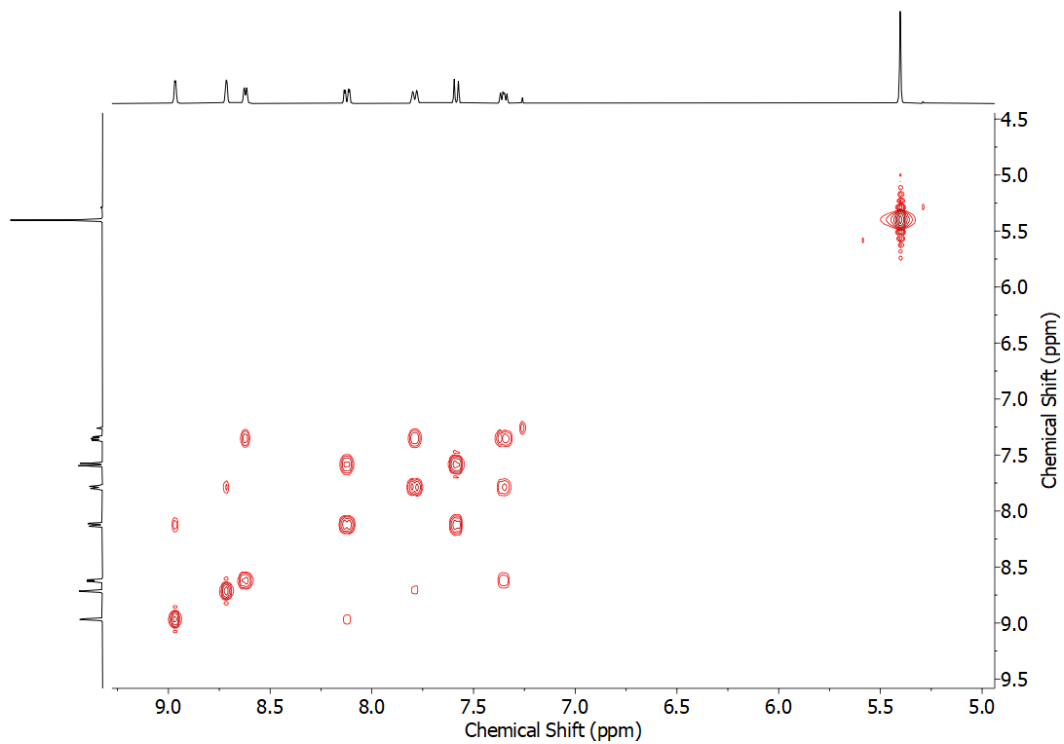

Figure S3 COSY NMR ( $\text{CDCl}_3$ ) of **S1**.

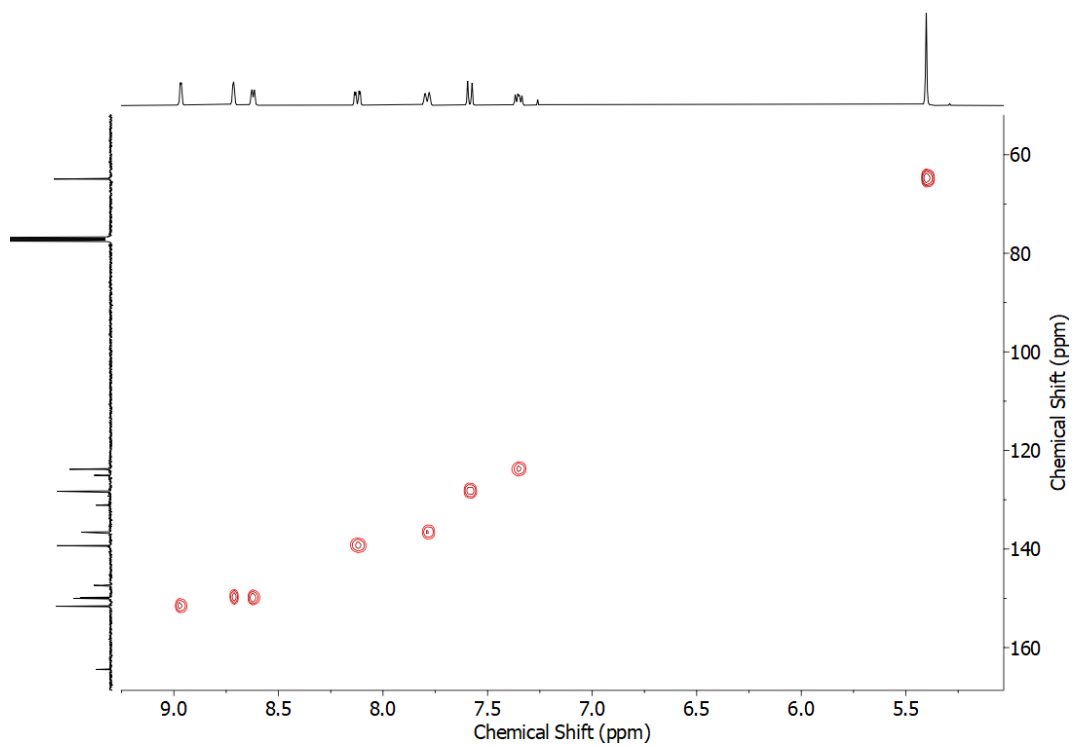

Figure S4 HSQC NMR ( $\text{CDCl}_3$ ) of **S1**.

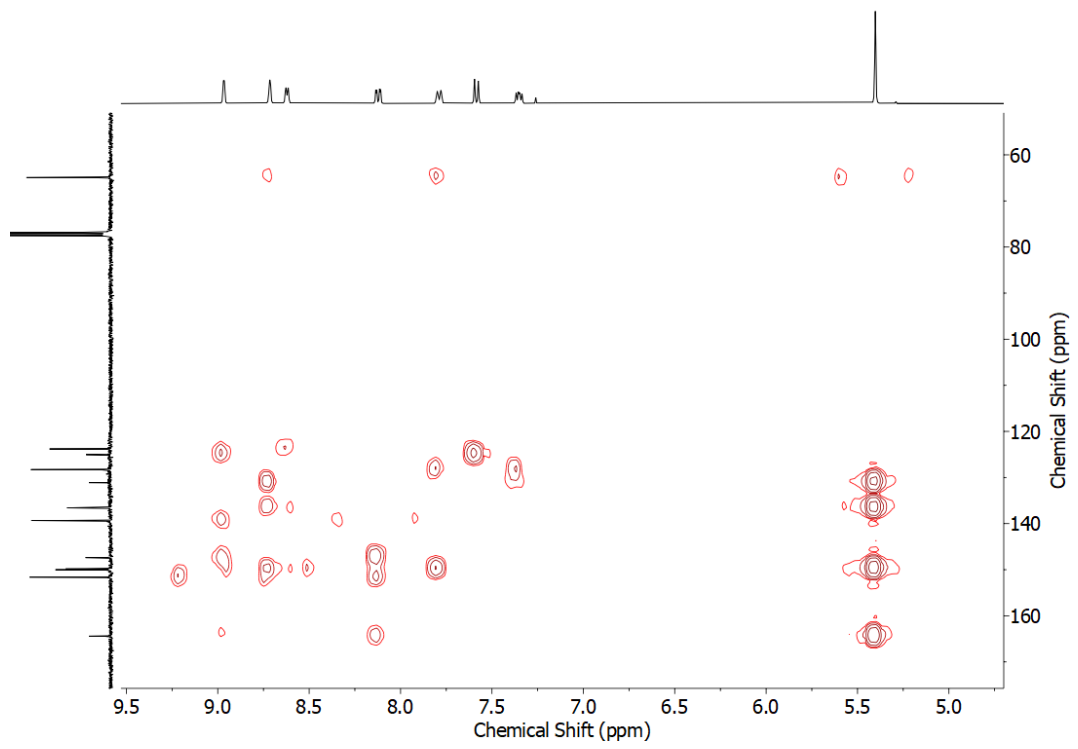

Figure S5 HMBC NMR ( $\text{CDCl}_3$ ) of S1.

## Synthesis of S2

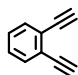

To a stirring solution of 1,2-diiodobenzene (0.990 g, 3 mmol, 1 eq.), Pd(PPh<sub>3</sub>)<sub>2</sub>Cl<sub>2</sub> (0.042 g, 0.06 mmol, 2 mol%) and CuI (0.011 g, 0.06 mmol, 2 mol%) in *i*-Pr<sub>2</sub>NH (30 mL) was added trimethylsilylacetylene (1.25 mL, 9 mmol, 3 eq.) via syringe and the reaction mixture stirred at rt for 24 h. H<sub>2</sub>O (25 mL) was added and the aqueous phase extracted with CH<sub>2</sub>Cl<sub>2</sub> (3 × 25 mL). The combined organic phases were dried (MgSO<sub>4</sub>) and the solvent removed *in vacuo*. The residue was filtered through a plug of silica gel (pentane) to give 1,2-bis(trimethylsilylethynyl)benzene as a yellow oil. This was dissolved in 1:1 CH<sub>2</sub>Cl<sub>2</sub>/MeOH (50 mL) under air and K<sub>2</sub>CO<sub>3</sub> (2.07 g, 15 mmol, 5 eq.) added as a solid. After stirring at rt for 2 h the mixture was filtered through celite and the solvent removed *in vacuo*. After filtration through a plug of silica gel (pentane) the product was obtained as a yellow oil (0.291 g, 77% over 2 steps). Spectroscopic data matched literature values.<sup>[1]</sup>

<sup>1</sup>H NMR (400 MHz, CDCl<sub>3</sub>) δ: 7.52 (m, 2H), 7.32 (m, 2H), 3.34 (s, 2H).

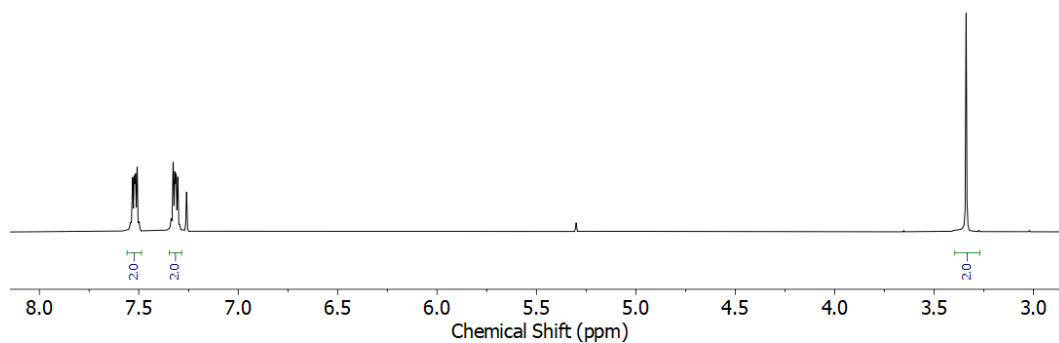

Figure S6 <sup>1</sup>H NMR (400 MHz, CDCl<sub>3</sub>) of S2.



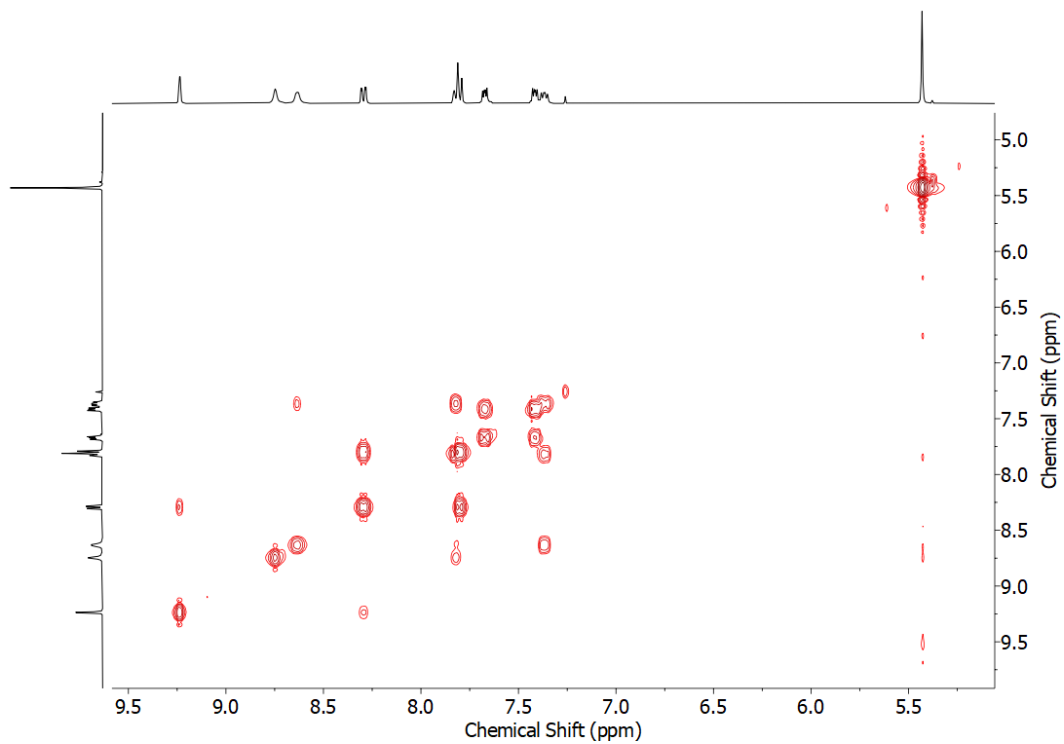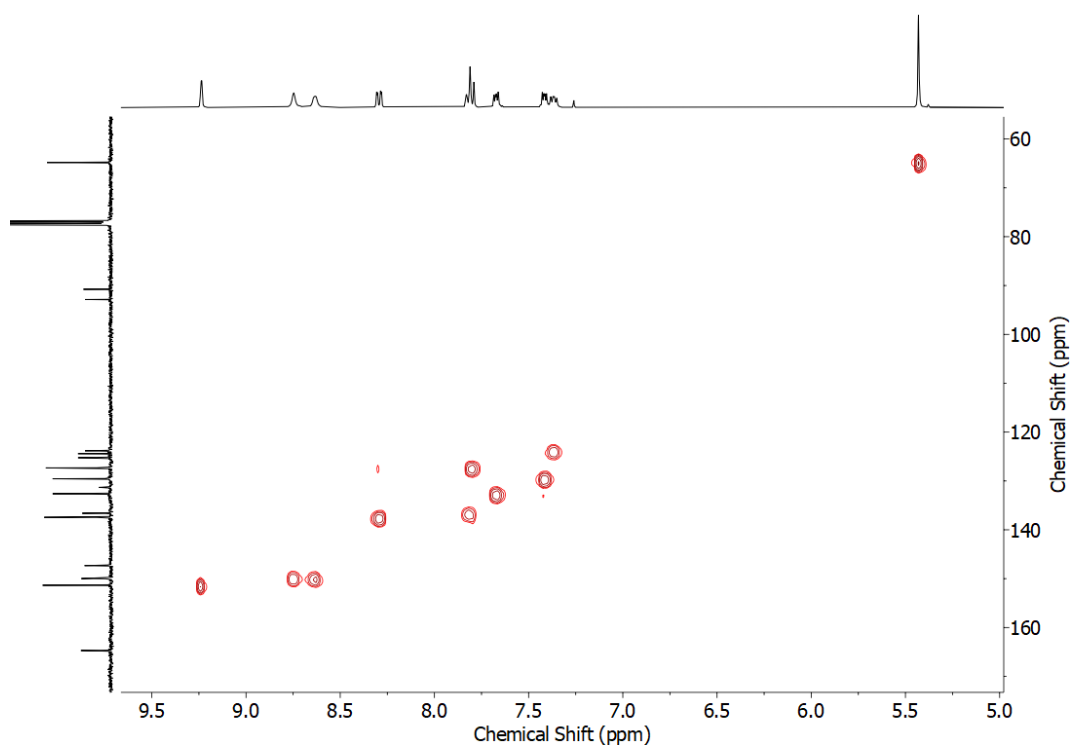

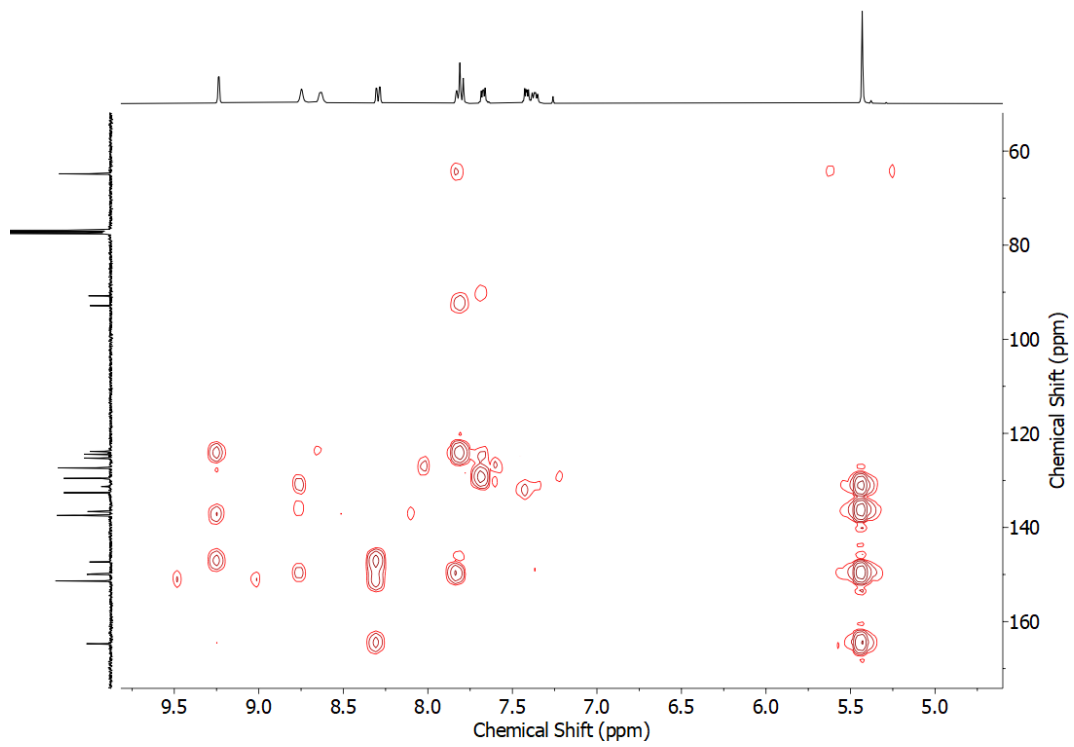

Figure S11 HMBC NMR ( $\text{CDCl}_3$ ) of  $\text{L}^{\text{P4}}$ .



## Synthesis of $[\text{Pd}_2(\text{L}^{\text{P4}})_2](\text{NO}_3)_4$ ( $\text{C}^{\text{P4}}$ )

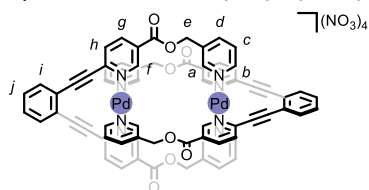

$\text{L}^{\text{P4}}$  (11.0 mg, 20  $\mu\text{mol}$ , 1 eq.) and  $\text{Pd}(\text{NO}_3)_2 \cdot 2\text{H}_2\text{O}$  (5.3 mg, 20  $\mu\text{mol}$ , 1 eq.) were sonicated in  $d_6$ -DMSO (0.75 mL) until a homogenous solution was obtained. After standing at rt for less than a day, quantitative conversion to  $[\text{Pd}_2(\text{L}^{\text{P4}})_2](\text{NO}_3)_4$  was observed by  $^1\text{H}$  NMR.

$^1\text{H}$  NMR (500 MHz,  $d_6$ -DMSO)  $\delta$ : 10.90 (dd,  $J = 1.9, 0.7$  Hz, 4H,  $\text{H}_f$ ), 9.82 (app. dt,  $J = 1.7, 0.8$  Hz, 4H,  $\text{H}_a$ ), 9.07 (ddd,  $J = 5.8, 1.4, 0.7$  Hz, 4H,  $\text{H}_b$ ), 8.76 (dd,  $J = 8.3, 1.9$  Hz, 4H,  $\text{H}_g$ ), 8.35 (dd,  $J = 8.2, 0.6$  Hz, 4H,  $\text{H}_h$ ), 8.26 (dd,  $J = 5.7, 3.3$  Hz, 4H,  $\text{H}_i/\text{H}_j$ ), 8.11 (ddd,  $J = 7.9, 2.1, 1.2$  Hz, 4H,  $\text{H}_d$ ), 7.98 (dd,  $J = 5.7, 3.4$  Hz, 4H,  $\text{H}_i/\text{H}_j$ ), 7.70 (m, 4H,  $\text{H}_c$ ), 5.49 (s, 8H,  $\text{H}_e$ ).

Diffusion coefficient (500 MHz,  $d_6$ -DMSO)  $D$ :  $1.16 \times 10^{-10} \text{ m}^2\text{s}^{-1}$ ;  $R_H$ : 8.64  $\text{\AA}$ .

$^{13}\text{C}$  NMR (126 MHz,  $d_6$ -DMSO)  $\delta$ : 162.2, 154.4 ( $\text{C}_f$ ), 150.9 ( $\text{C}_b$ ), 149.3 ( $\text{C}_a$ ), 145.7, 142.7 ( $\text{C}_g$ ), 139.9 ( $\text{C}_d$ ), 135.4, 133.9 ( $\text{C}_i/\text{C}_j$ ), 132.5 ( $\text{C}_i/\text{C}_j$ ), 132.0 ( $\text{C}_h$ ), 128.2, 127.1 ( $\text{C}_c$ ), 123.3, 99.1, 89.5, 65.2 ( $\text{C}_e$ ).

ESI-MS  $m/z = 458.75$   $\{[\text{Pd}_2(\text{L}^{\text{P4}})_2](\text{NO}_3)\}^{3+}$  calc. 458.71.

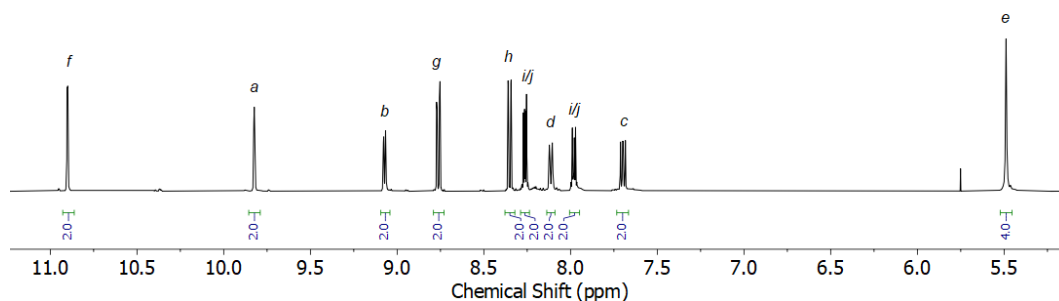

Figure S12  $^1\text{H}$  NMR (500 MHz,  $d_6$ -DMSO) of  $[\text{Pd}_2(\text{L}^{\text{P4}})_2](\text{NO}_3)_4$ .

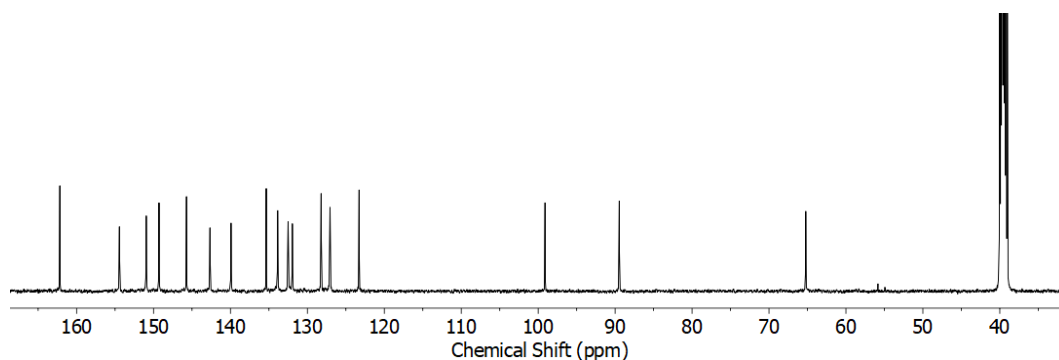

Figure S13  $^{13}\text{C}$  NMR (126 MHz,  $d_6$ -DMSO) of  $[\text{Pd}_2(\text{L}^{\text{P4}})_2](\text{NO}_3)_4$ .

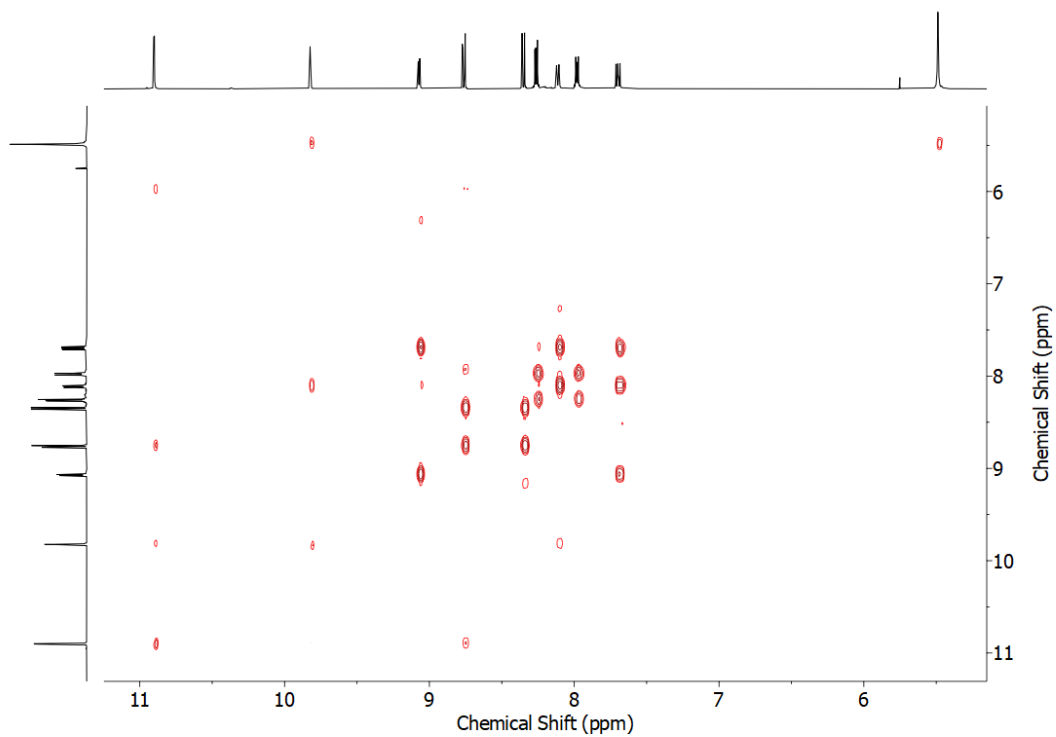

Figure S14 COSY NMR ( $d_6$ -DMSO) of  $[\text{Pd}_2(\text{L}^{\text{P4}})_2](\text{NO}_3)_4$ .

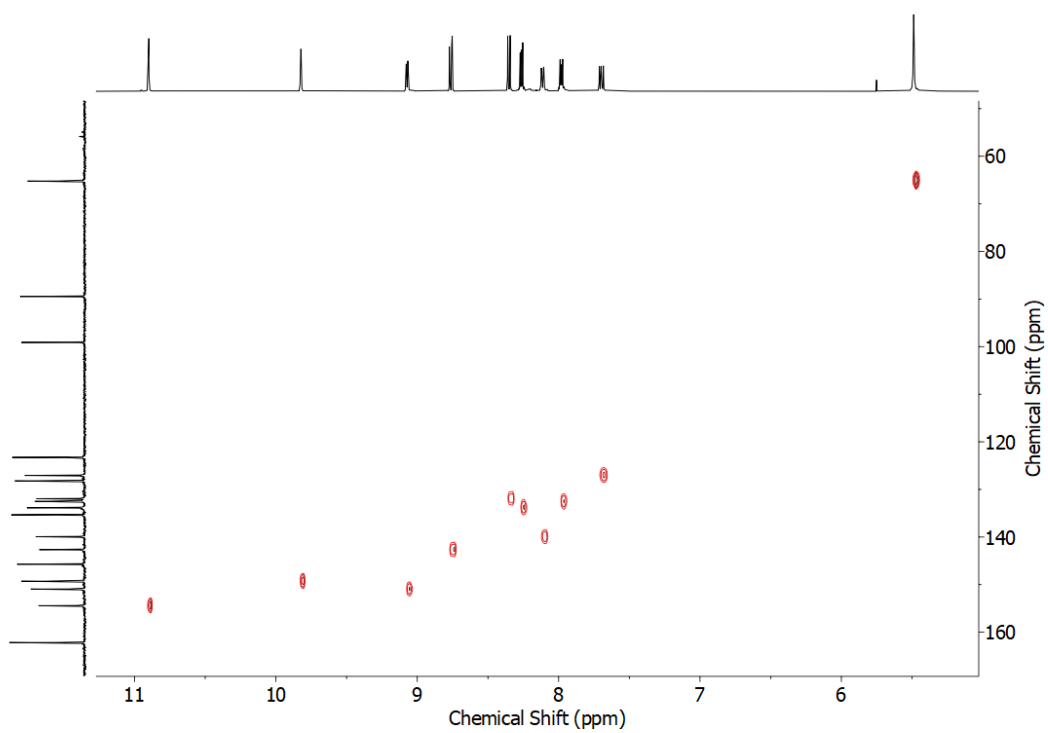

Figure S15 HSQC NMR ( $d_6$ -DMSO) of  $[\text{Pd}_2(\text{L}^{\text{P4}})_2](\text{NO}_3)_4$ .

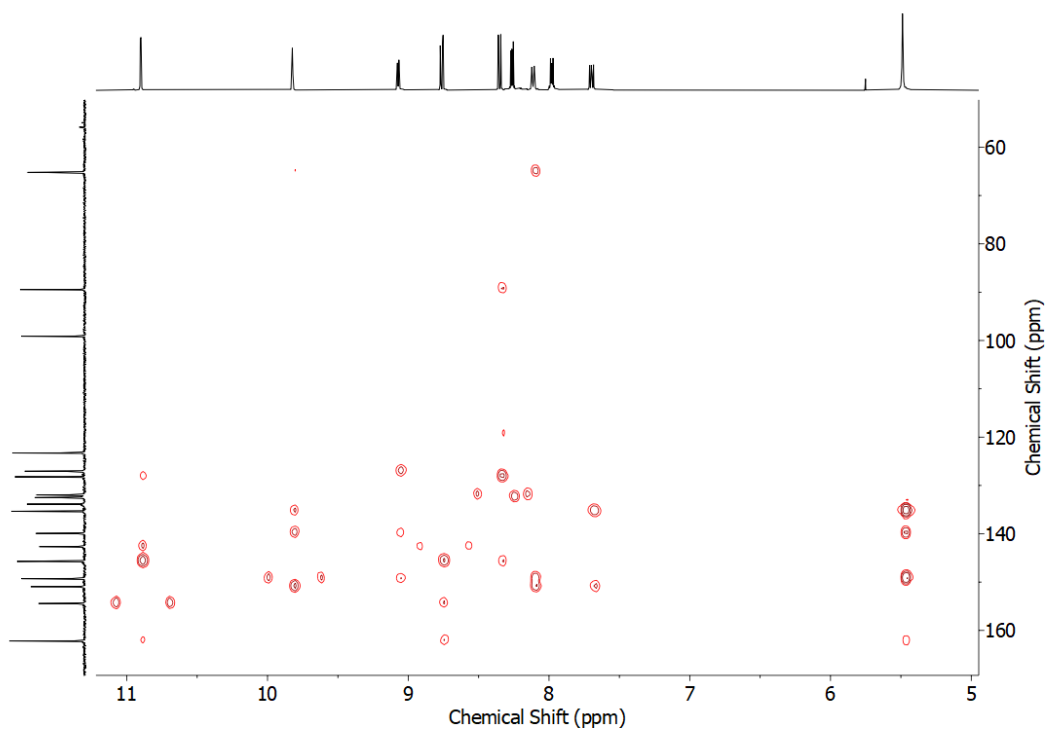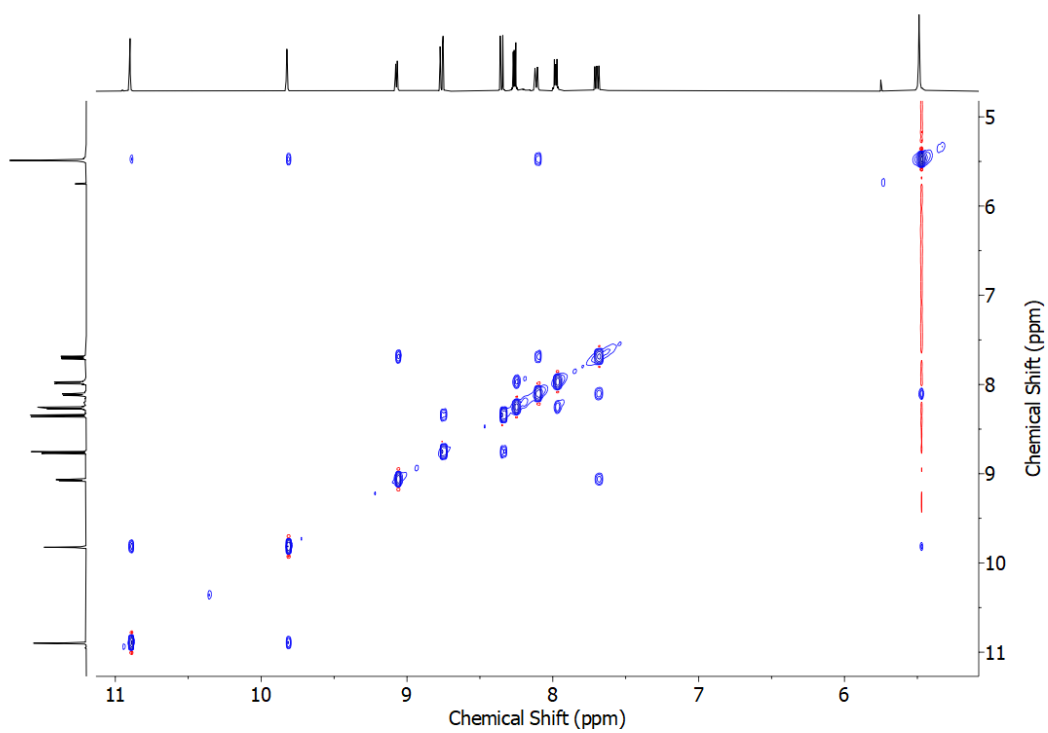

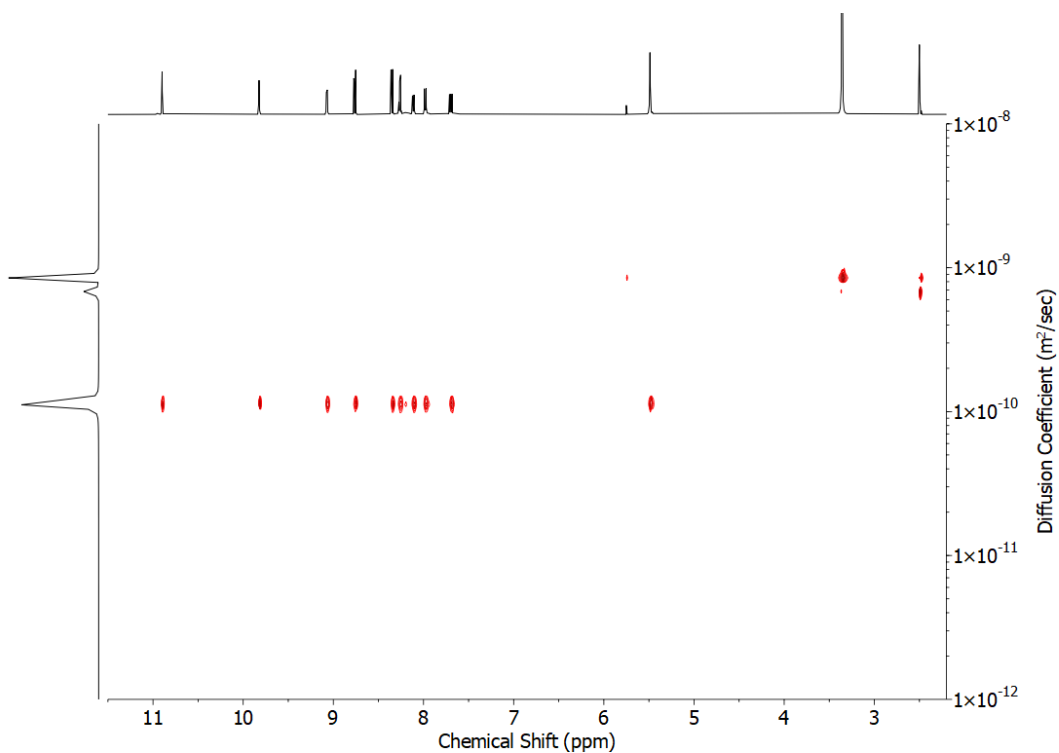

Figure S18 DOSY ( $d_6$ -DMSO) of  $[\text{Pd}_2(\text{L}^{\text{P4}})_2](\text{NO}_3)_4$ .

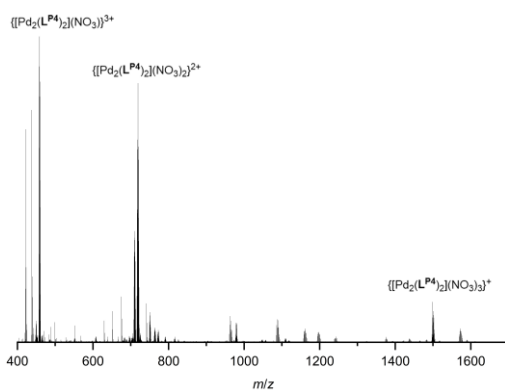

Figure S19 ESI-MS of  $[\text{Pd}_2(\text{L}^{\text{P4}})_2](\text{NO}_3)_4$ .

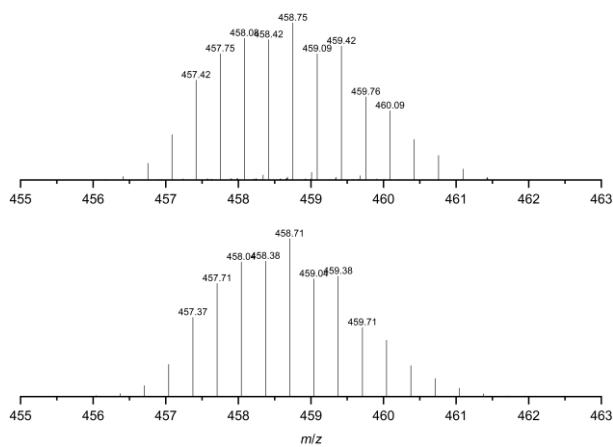

Figure S20 Observed (top) and calculated (bottom) isotopic patterns for  $[\text{Pd}_2(\text{L}^{\text{P4}})_2](\text{NO}_3)_3^+$ .

## Synthesis of $[\text{Pd}_2(\text{L}^{\text{P4}})_2\text{Cl}](\text{BF}_4)_3$

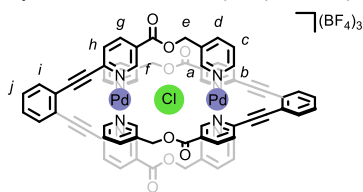

$\text{L}^{\text{P4}}$  (11.0 mg, 20  $\mu\text{mol}$ ),  $[\text{Pd}(\text{CH}_3\text{CN})_4](\text{BF}_4)_2$  (8.9 mg, 20  $\mu\text{mol}$ ) and  $\text{Bu}_4\text{NCl}$  (2.8 mg, 10  $\mu\text{mol}$ ) were sonicated in  $d_6$ -DMSO (0.75 mL) until a homogenous solution was obtained. After standing at rt for 2 d the solution was diluted with DMF (0.75 mL), filtered through celite and left for vapour diffusion of  $\text{Et}_2\text{O}$ . After 5 d the mother liquor was decanted off and the yellow precipitate washed with  $\text{Et}_2\text{O}$  before drying in air. This was dissolved in DMF, filtered through celite and left for vapour diffusion of  $\text{Et}_2\text{O}$ , resulting in light yellow, X-ray quality crystals. After 11 d, the mother liquor was decanted off and the precipitate washed with  $\text{Et}_2\text{O}$  before drying in air to give the product as a yellow solid (9.5 mg, 59%).

$^1\text{H}$  NMR (400 MHz,  $d_6$ -DMSO)  $\delta$ : 11.30 (d,  $J = 1.9$  Hz, 2H,  $\text{H}_f$ ), 10.23 (s, 2H,  $\text{H}_a$ ), 9.25 (d,  $J = 5.7$  Hz, 2H,  $\text{H}_b$ ), 8.75 (dd,  $J = 8.3, 1.9$  Hz, 2H,  $\text{H}_g$ ), 8.34 (d,  $J = 8.3$  Hz, 2H,  $\text{H}_h$ ), 8.27 (dd,  $J = 5.7, 3.3$  Hz, 2H,  $\text{H}_i/\text{H}_j$ ), 8.07 (dt,  $J = 8.0, 1.6$  Hz, 2H,  $\text{H}_d$ ), 7.99 (dd,  $J = 5.7, 3.4$  Hz, 2H,  $\text{H}_i/\text{H}_j$ ), 7.75 (dd,  $J = 8.0, 5.8$  Hz, 2H,  $\text{H}_c$ ), 5.46 (s, 4H,  $\text{H}_e$ ).

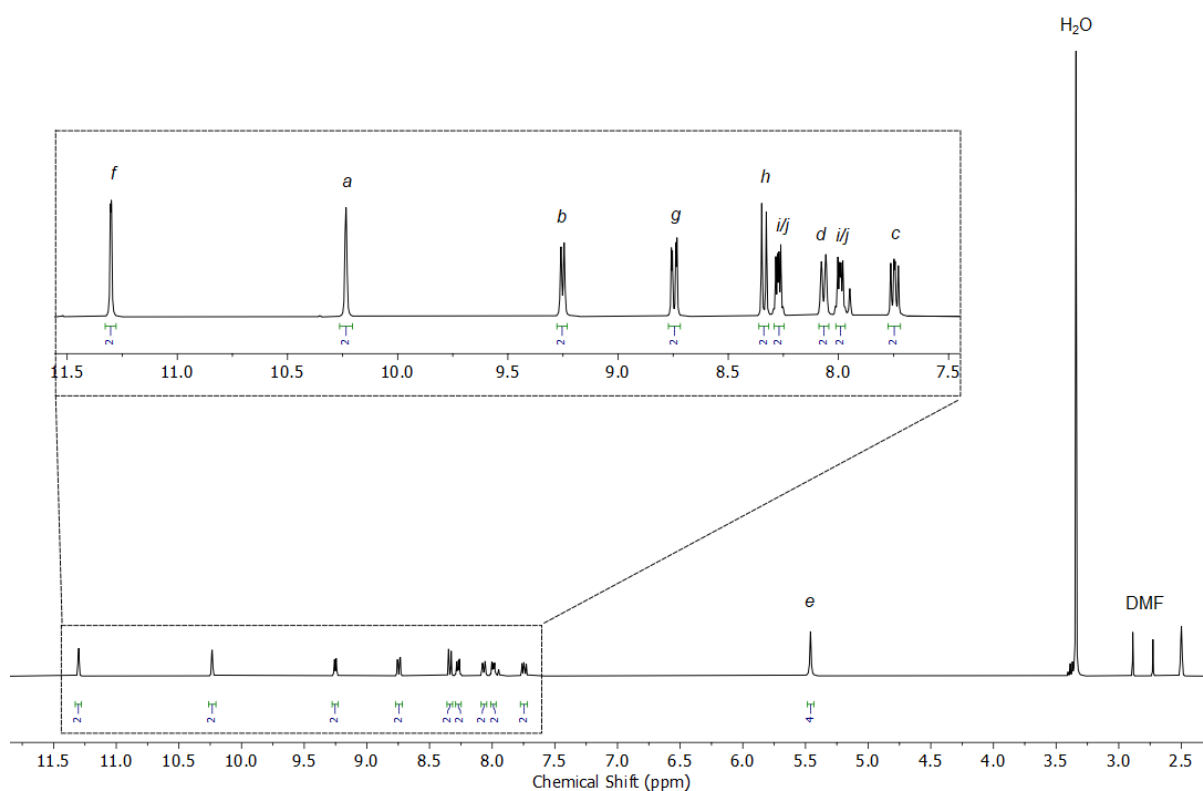

Figure S21  $^1\text{H}$  NMR (400 MHz,  $d_6$ -DMSO) of  $[\text{Pd}_2(\text{L}^{\text{P4}})_2\text{Cl}](\text{BF}_4)_3$ .

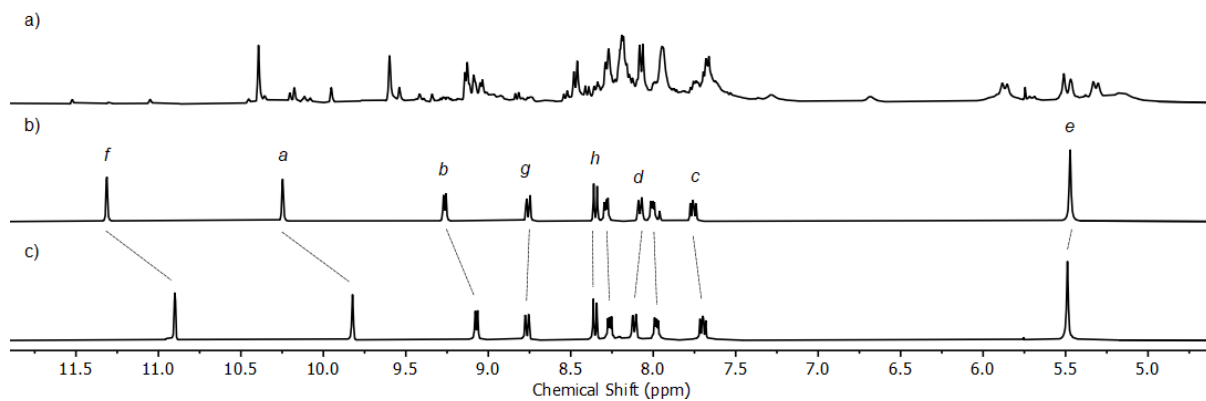

Figure S22 Partial  $^1\text{H}$  NMR (400 MHz,  $d_6$ -DMSO, 298 K) of a) 1:1 mixture of  $\text{L}^{\text{P}4}$  and  $[\text{Pd}(\text{CH}_3\text{CN})_4](\text{BF}_4)_2$  after standing at rt for 2 d; b)  $[\text{Pd}_2(\text{L}^{\text{P}4})_2\text{Cl}](\text{BF}_4)_3$ , and c)  $[\text{Pd}_2(\text{L}^{\text{P}4})_2\text{NO}_3](\text{NO}_3)_3$ .

## Synthesis of S3

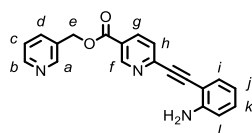

**S1** (0.586 g, 2.0 mmol, 1 eq.), 2-ethynylaniline (0.281 g, 2.4 mmol, 1.2 eq.), [Pd(PPh<sub>3</sub>)<sub>2</sub>Cl<sub>2</sub>] (0.035 g, 0.050 mmol, 2.5 mol%) and CuI (0.010 g, 0.050 mmol, 2.5 mol%) were stirred at rt in 2:1 dioxane/*i*-Pr<sub>2</sub>NH (15 mL) for 48 h. EDTA solution (25 mL) was added and the reaction mixture extracted with CH<sub>2</sub>Cl<sub>2</sub> (3 × 20 mL). The combined organic layers were dried (MgSO<sub>4</sub>) and the solvent removed *in vacuo*. Following purification by column chromatography on silica gel (step gradient 0:10 to 5:5 acetone/CH<sub>2</sub>Cl<sub>2</sub> in 10% increments) the product was obtained as a fluffy yellow solid (0.560 g, 85%).

**<sup>1</sup>H NMR** (400 MHz, CDCl<sub>3</sub>) δ: 9.21 (dd, *J* = 2.2, 0.9 Hz, 1H, H<sub>f</sub>), 8.74 (br. s, 1H, H<sub>a</sub>), 8.63 (br. s, 1H, H<sub>b</sub>), 8.28 (dd, *J* = 8.2, 2.2 Hz, 1H, H<sub>g</sub>), 7.80 (app. dt, *J* = 7.8, 1.9 Hz, 1H, H<sub>d</sub>), 7.57 (dd, *J* = 8.2, 0.9 Hz, 1H, H<sub>h</sub>), 7.42 (dd, *J* = 8.0, 1.6 Hz, 1H, H<sub>i</sub>), 7.35 (dd, *J* = 7.8, 4.8 Hz, 1H, H<sub>c</sub>) 7.19 (app. td, *J* = 7.6, 1.5 Hz, 1H, H<sub>k</sub>), 6.74-6.70 (m, 2H, H<sub>j</sub>, H<sub>l</sub>), 5.42 (s, 2H, H<sub>e</sub>), 4.42 (br. s, 2H, H<sub>NH</sub>).

**<sup>13</sup>C NMR** (101 MHz, CDCl<sub>3</sub>) δ: 164.7, 151.4 (C<sub>f</sub>), 150.2 (C<sub>b</sub>), 150.0 (C<sub>a</sub>), 149.0, 147.7, 137.4 (C<sub>g</sub>), 136.4 (C<sub>d</sub>), 133.0 (C<sub>i</sub>), 131.3 (C<sub>k</sub>), 126.5 (C<sub>h</sub>), 124.0, 123.8 (C<sub>c</sub>), 118.1 (C<sub>j</sub>/C<sub>l</sub>), 114.7 (C<sub>j</sub>/C<sub>l</sub>), 106.0, 94.0, 90.1, 64.8 (C<sub>e</sub>).

**HR-ESI-MS** *m/z* = 330.1241 [M+H]<sup>+</sup> calc. 330.1243.

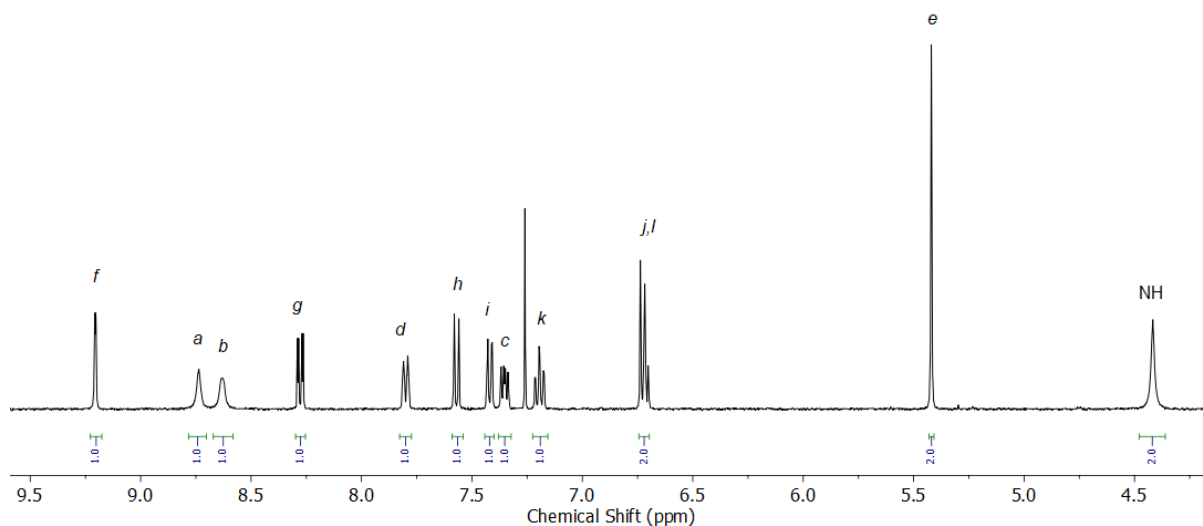

Figure S23 <sup>1</sup>H NMR (400 MHz, CDCl<sub>3</sub>) of S3.

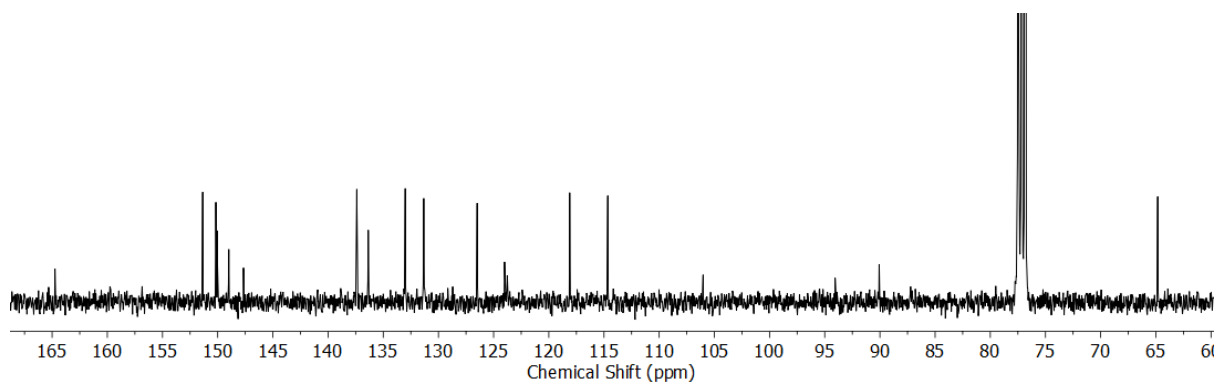

Figure S24  $^{13}\text{C}$  NMR (101 MHz,  $\text{CDCl}_3$ ) of **S3**.

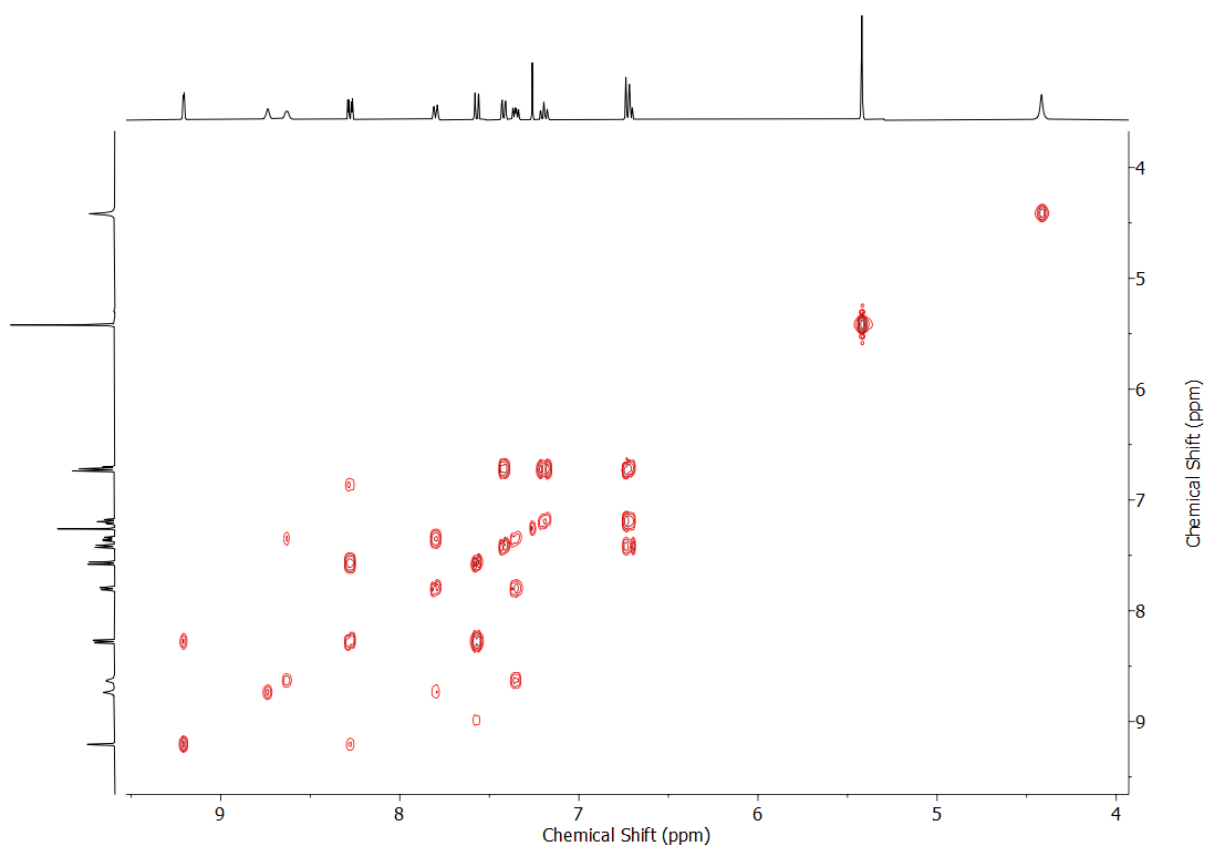

Figure S25 COSY NMR ( $\text{CDCl}_3$ ) of **S3**.



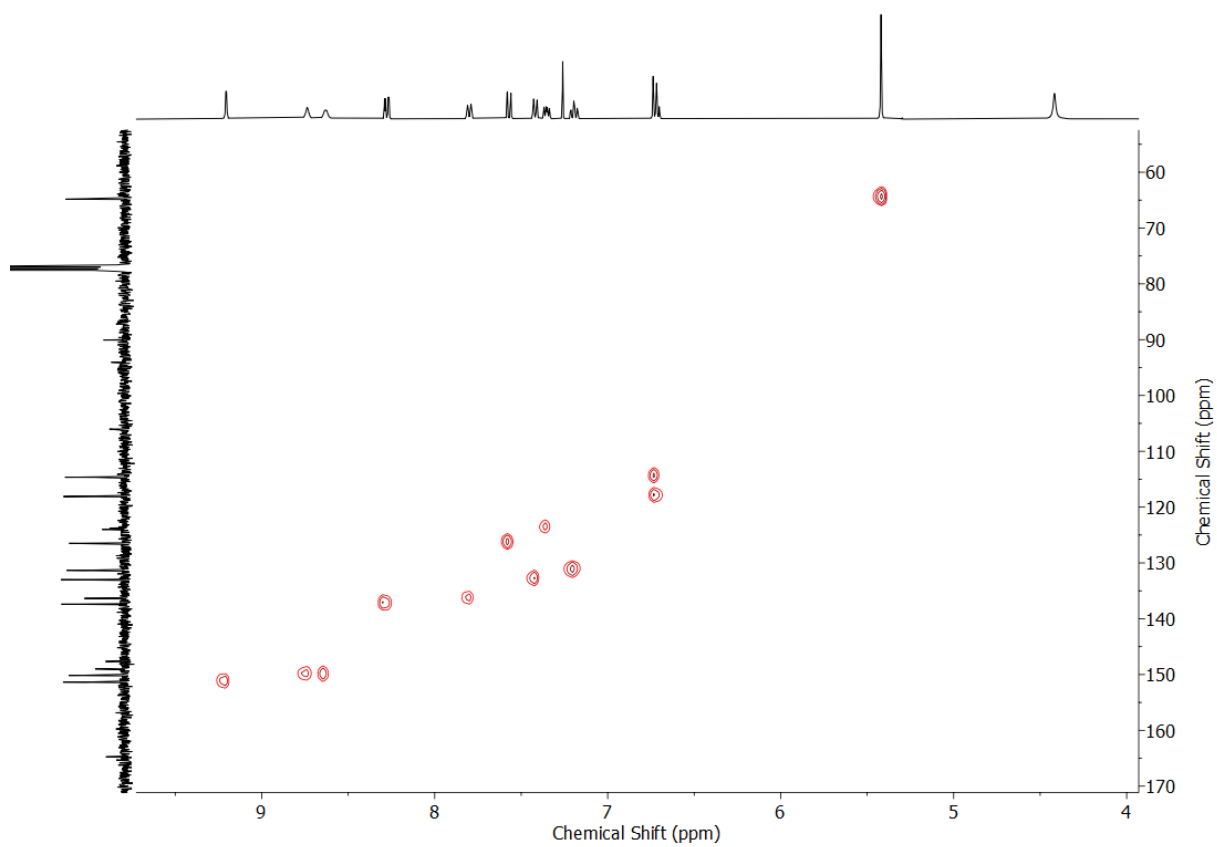

Figure S26 HSQC NMR (CDCl<sub>3</sub>) of S3.

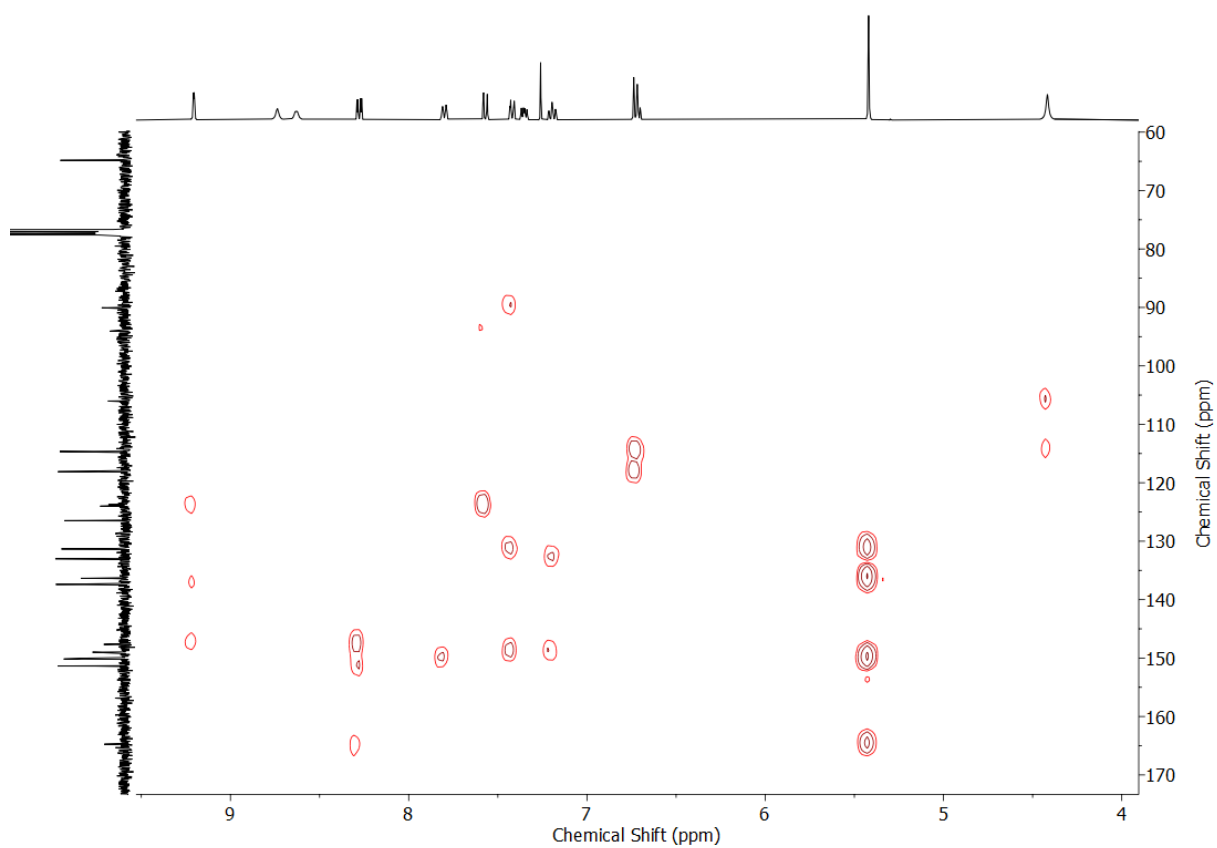

Figure S27 HMBC NMR (CDCl<sub>3</sub>) of S3.

## Synthesis of S4

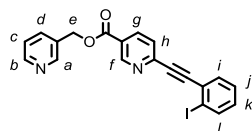

To a vigorously stirring mixture of **S3** (0.494 g, 1.5 mmol, 1 eq.) and TsOH·H<sub>2</sub>O (0.856 g, 4.5 mmol, 3 eq.) in CH<sub>3</sub>CN (9 mL) at 0 °C under air was added dropwise a solution of NaNO<sub>2</sub> (0.207 g, 3.0 mmol, 2 eq.) and KI (0.623 g, 3.75 mmol, 2.5 eq.) in H<sub>2</sub>O (1 mL). The reaction was stirred, allowing to warm to rt, for 21 h. H<sub>2</sub>O (20 mL), sat. aq. NaHCO<sub>3</sub> (20 mL) and 0.5 M Na<sub>2</sub>S<sub>2</sub>O<sub>3(aq)</sub> (20 mL) were added sequentially. The reaction mixtures was extracted with EtOAc (3 × 25 mL) and the combined organic phases dried (MgSO<sub>4</sub>) and the solvent removed *in vacuo*. After purification by column chromatography on silica gel (1:9 acetone/CH<sub>2</sub>Cl<sub>2</sub>) the product was obtained as a yellow oil (0.476 g, 72%) that solidified on standing.

**<sup>1</sup>H NMR** (400 MHz, CDCl<sub>3</sub>) δ: 9.24 (dd, *J* = 2.2, 0.9 Hz, 1H, H<sub>f</sub>), 8.73 (d, *J* = 1.9 Hz, 1H, H<sub>a</sub>), 8.63 (dd, *J* = 4.9, 1.7 Hz, 1H, H<sub>b</sub>), 8.30 (dd, *J* = 8.2, 2.2 Hz, 1H, H<sub>g</sub>), 7.90 (dd, *J* = 8.0, 1.1 Hz, 1H, H<sub>i</sub>), 7.80 (ddd, *J* = 7.9, 2.3, 1.7 Hz, 1H, H<sub>d</sub>), 7.69 (dd, *J* = 8.2, 0.9 Hz, 1H, H<sub>h</sub>), 7.62 (dd, *J* = 7.8, 1.7 Hz, 2H, H<sub>i</sub>), 7.38-7.33 (m, 2H, H<sub>c</sub>, H<sub>j</sub>), 7.08 (td, *J* = 7.7, 1.7 Hz, 1H, H<sub>k</sub>), 5.42 (s, 2H, H<sub>e</sub>).

**<sup>13</sup>C NMR** (101 MHz, CDCl<sub>3</sub>) δ: 164.7, 151.4 (C<sub>f</sub>), 150.2 (C<sub>b</sub>), 150.0 (C<sub>a</sub>), 147.3, 139.1 (C<sub>l</sub>), 137.4 (C<sub>g</sub>), 136.4 (C<sub>d</sub>), 133.5 (C<sub>i</sub>), 131.2, 130.8 (C<sub>k</sub>), 128.4, 128.1 (C<sub>c</sub>/C<sub>j</sub>), 127.2 (C<sub>h</sub>), 124.5, 123.7 (C<sub>c</sub>/C<sub>j</sub>), 101.4, 94.4, 91.5, 64.9 (C<sub>e</sub>).

**HR-ESI-MS** *m/z* = 441.0087 [M+H]<sup>+</sup> calc. 441.0100.

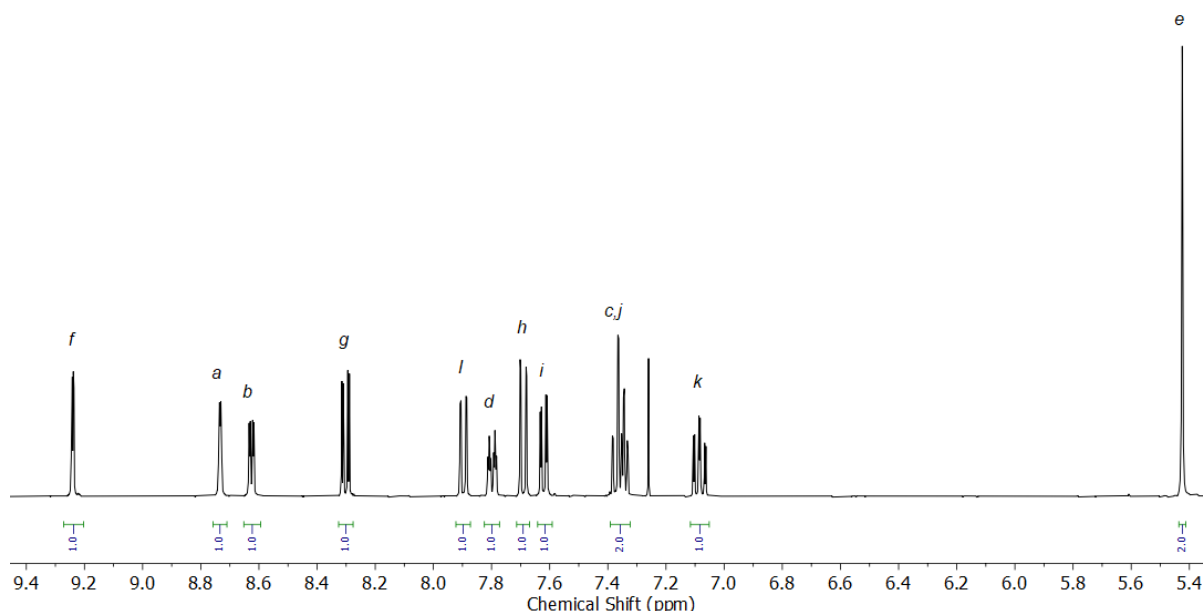

Figure S28 <sup>1</sup>H NMR (400 MHz, CDCl<sub>3</sub>) of **S4**.

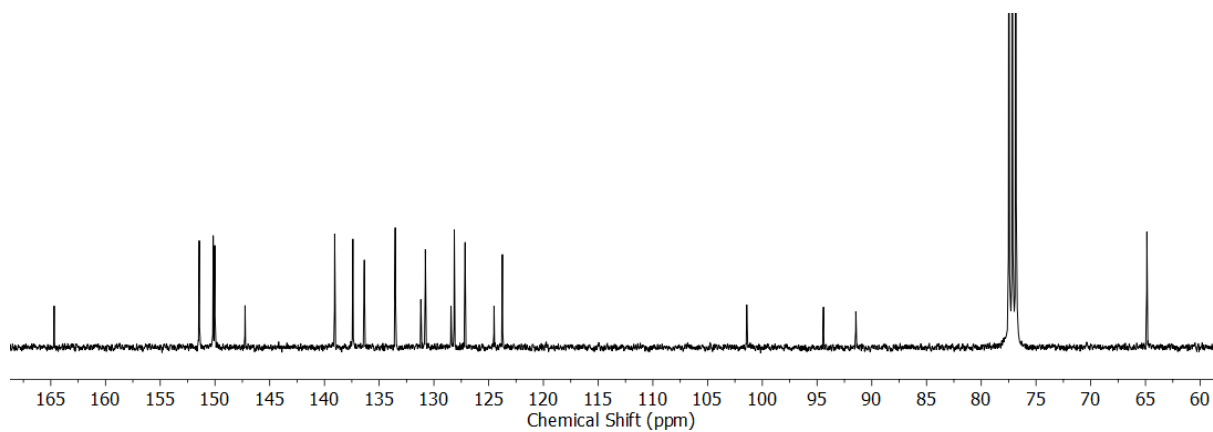

Figure S29  $^{13}\text{C}$  NMR (101 MHz,  $\text{CDCl}_3$ ) of **S4**.

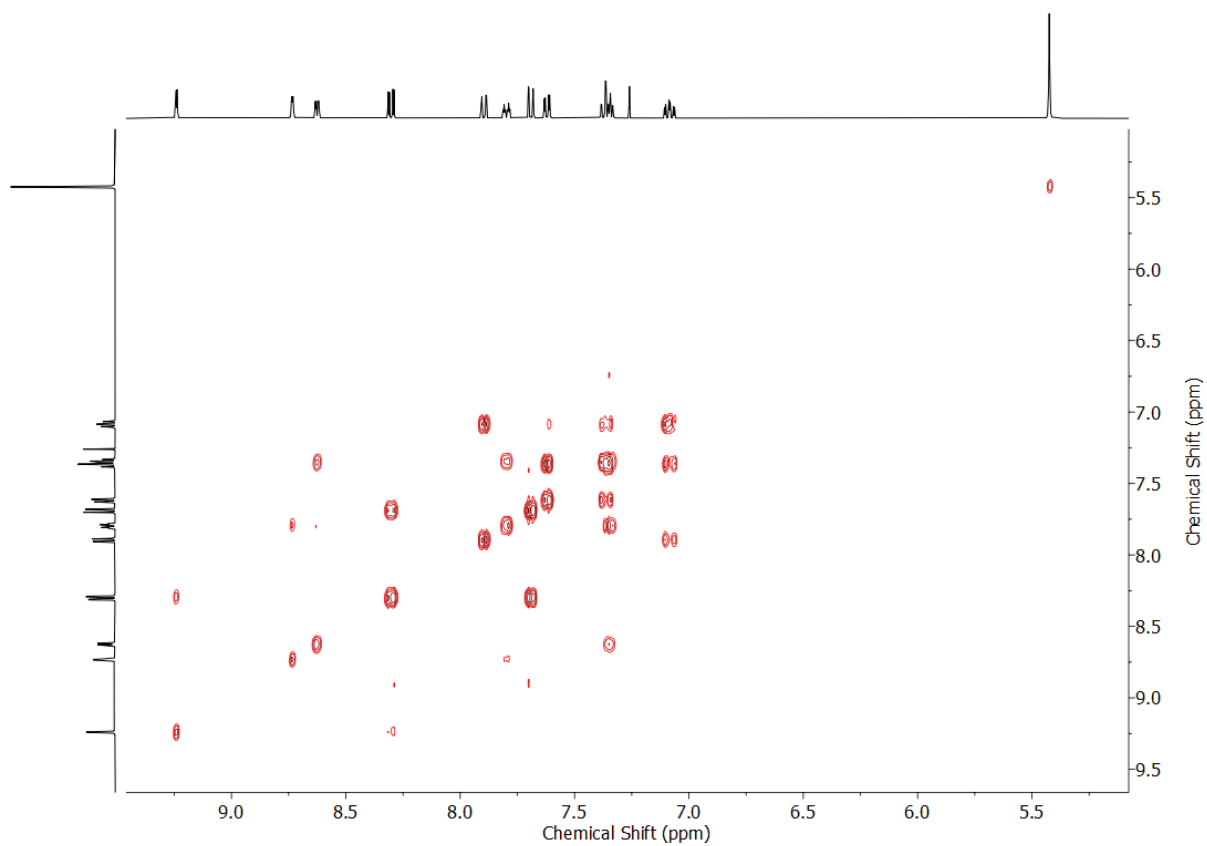

Figure S30 COSY NMR ( $\text{CDCl}_3$ ) of **S4**.

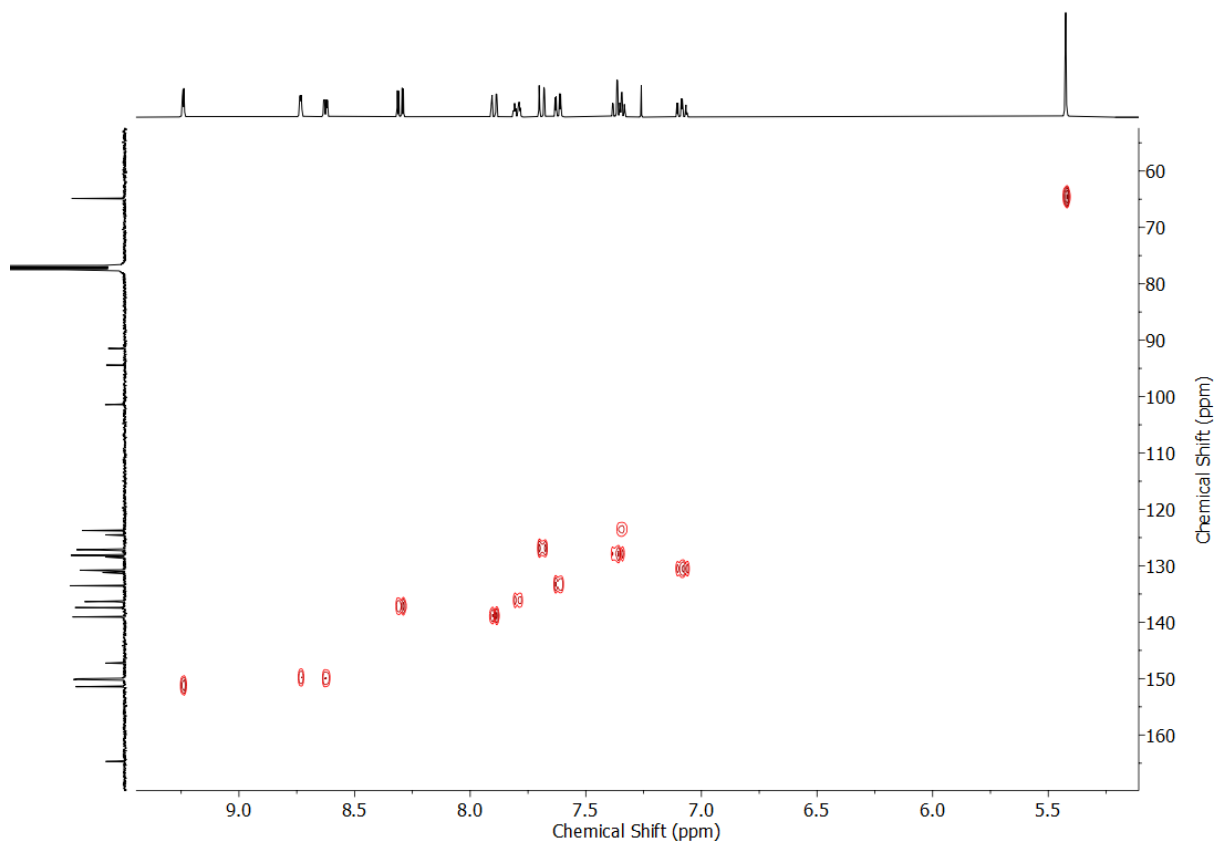

Figure S31 HSQC NMR ( $\text{CDCl}_3$ ) of **S4**.

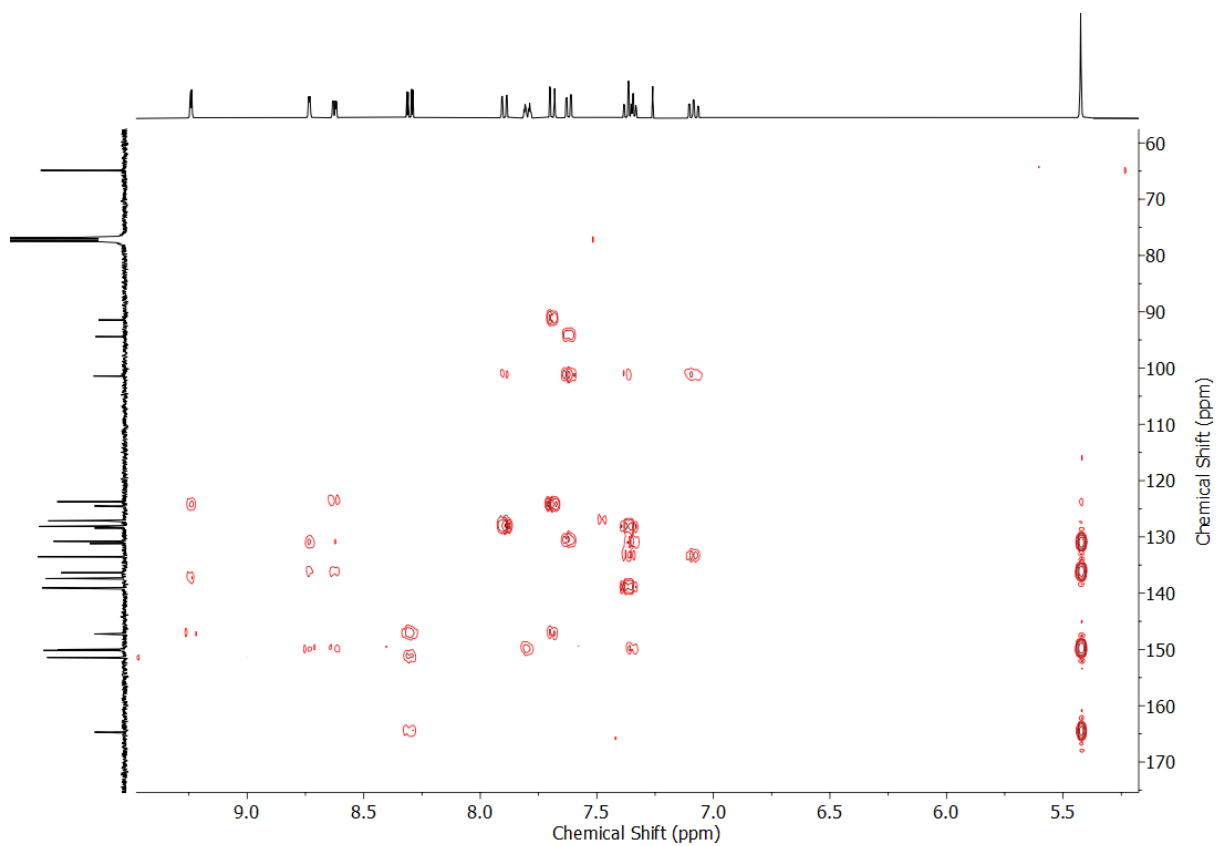

Figure S32 HMBC NMR ( $\text{CDCl}_3$ ) of **S4**.

## Synthesis of S5

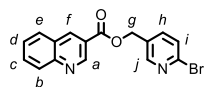

To a stirring solution of EDCI·HCl (0.690 g, 3.6 mmol, 1.2 eq.) and DMAP (0.047 g, 0.3 mmol, 0.1 eq.) in CHCl<sub>3</sub> (15 mL) at 0 °C was added 3-quinolinecarboxylic acid (0.520 g, 3.0 mmol, 1 eq.) as a solid. After 30 minutes, 6-bromopyridine-3-methanol (0.620 g, 3.3 mmol, 1.1 eq.) was added as a solid. The reaction mixture was allowed to warm to rt and stirred for 18 h before washing with sat. aq. NaHCO<sub>3</sub> (25 mL) and brine (25 mL), drying (MgSO<sub>4</sub>) and the solvent removed *in vacuo*. After purification by column chromatography on silica gel (1:9 acetone/CH<sub>2</sub>Cl<sub>2</sub>) the product was obtained as a white solid (0.929 g, 90%).

**<sup>1</sup>H NMR** (400 MHz, CDCl<sub>3</sub>) δ: 9.44 (d, *J* = 2.1 Hz, 1H, H<sub>a</sub>), 8.84 (d, *J* = 2.0 Hz, 1H, H<sub>f</sub>), 8.53 (dd, *J* = 2.5, 0.7 Hz, 1H, H<sub>j</sub>), 8.17 (dd, *J* = 8.5, 1.0 Hz, 1H, H<sub>e</sub>), 7.94 (m, 1H, H<sub>b</sub>), 7.86 (ddd, *J* = 8.5, 6.9, 1.4 Hz, 1H, H<sub>d</sub>), 7.71 (dd, *J* = 8.2, 2.5 Hz, 1H, H<sub>h</sub>), 7.64 (ddd, *J* = 8.1, 6.9, 1.2 Hz, 1H, H<sub>c</sub>), 7.55 (dd, *J* = 8.2, 0.7 Hz, 1H, H<sub>i</sub>), 5.43 (s, 2H, H<sub>g</sub>).

**<sup>13</sup>C NMR** (101 MHz, CDCl<sub>3</sub>) δ: 165.2, 150.4 (C<sub>j</sub>), 150.2, 150.0 (C<sub>a</sub>), 142.6, 139.2 (C<sub>f</sub>), 139.0 (C<sub>h</sub>), 132.4 (C<sub>d</sub>), 130.8, 129.7 (C<sub>e</sub>), 129.3 (C<sub>b</sub>), 128.4 (C<sub>i</sub>), 127.8 (C<sub>c</sub>), 126.9, 122.5, 63.9 (C<sub>g</sub>).

**HR-ESI-MS** *m/z* = 343.0086 [M+H]<sup>+</sup> calc. 343.0082.

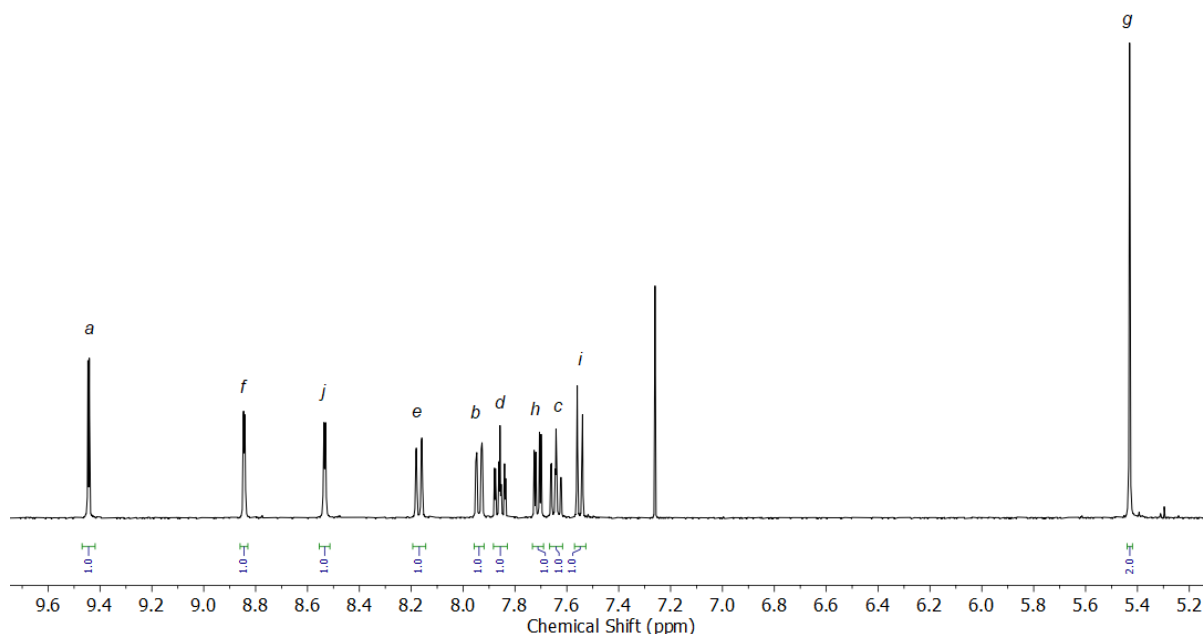

Figure S33 <sup>1</sup>H NMR (400 MHz, CDCl<sub>3</sub>) of S5.

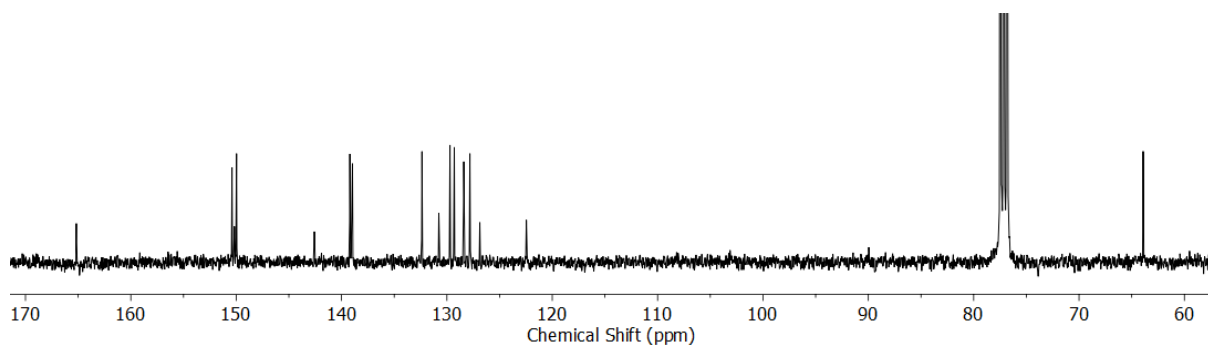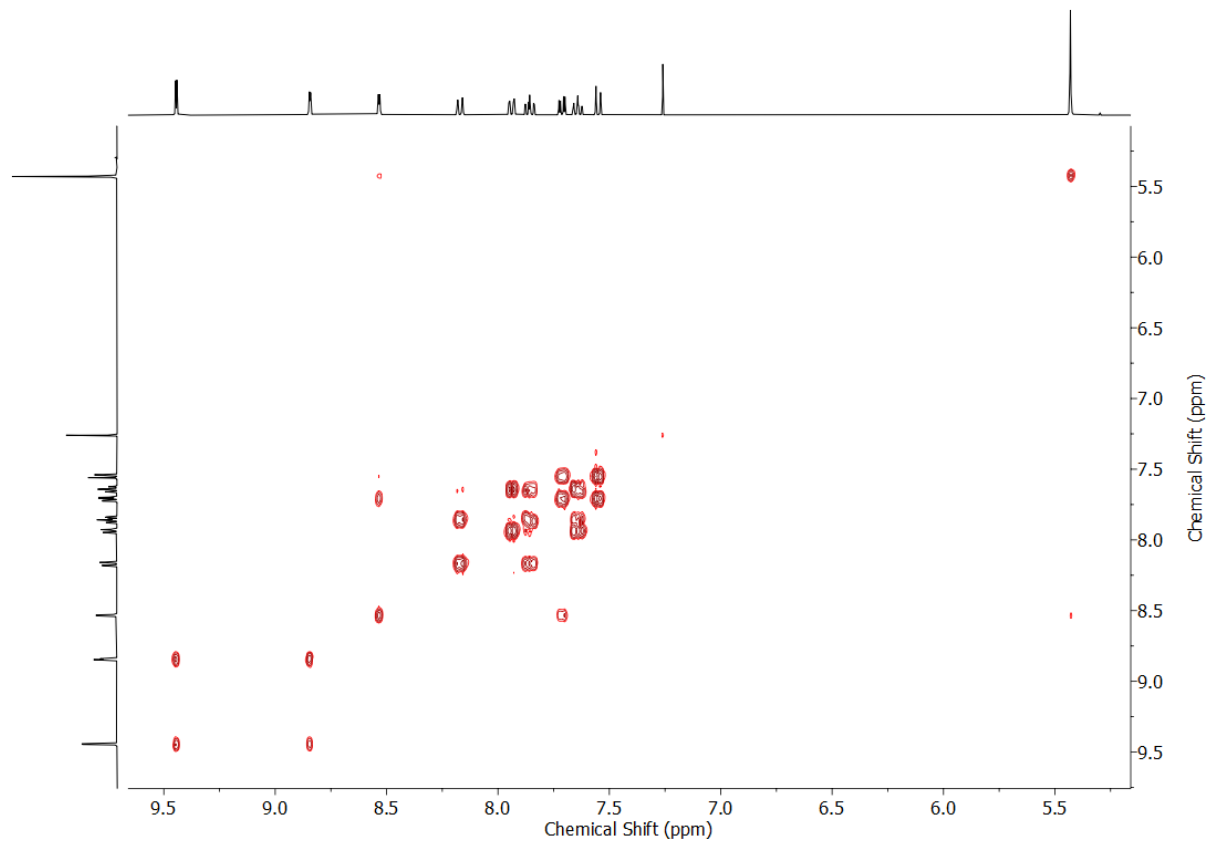

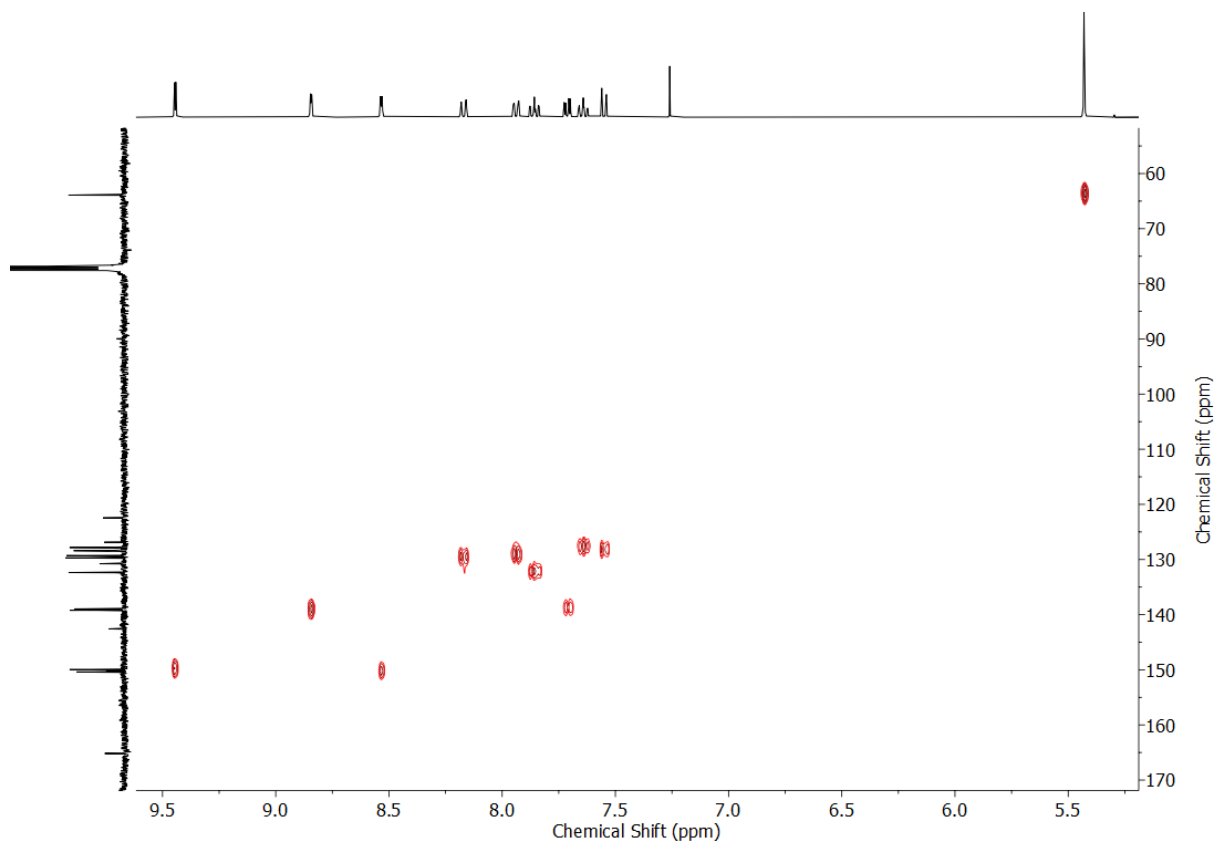

Figure S36 HSQC NMR ( $\text{CDCl}_3$ ) of **55**.

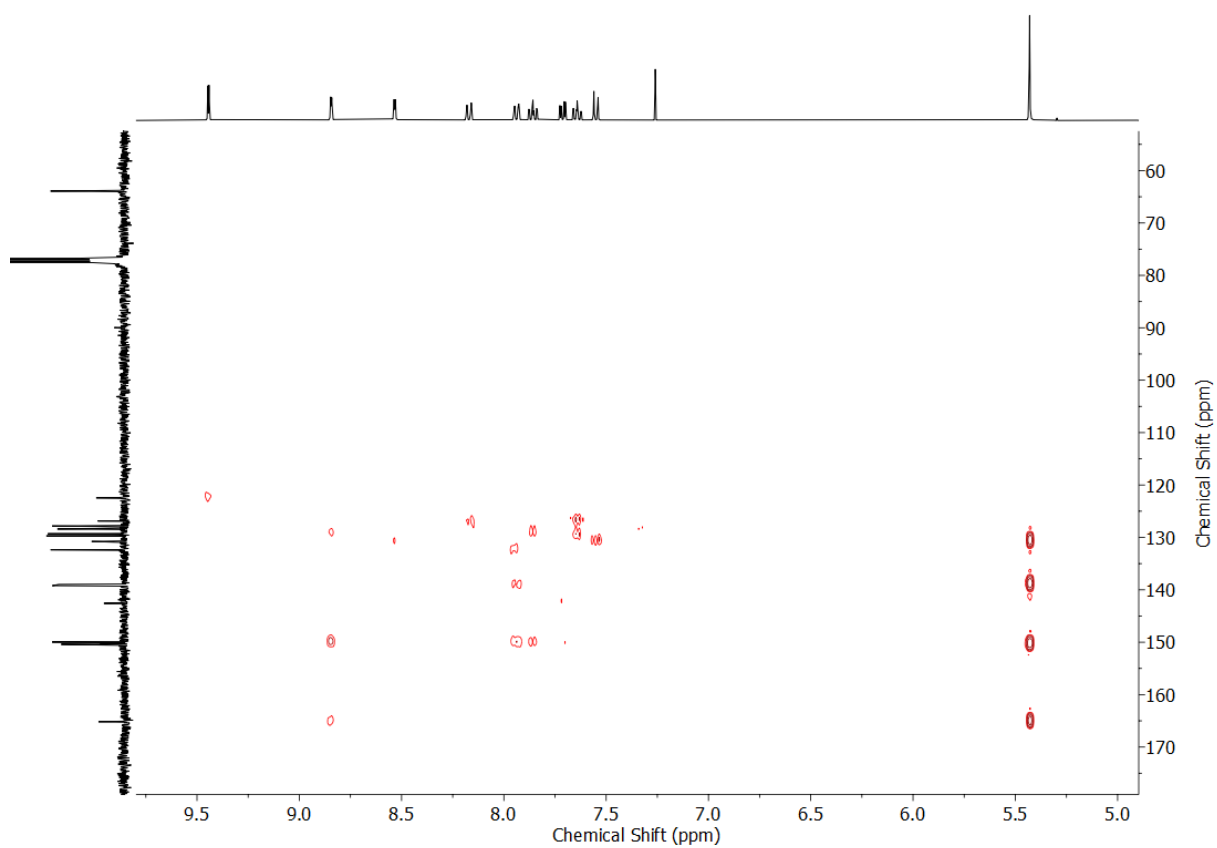

Figure S37 HMBC NMR ( $\text{CDCl}_3$ ) of **55**.

## Synthesis of S6

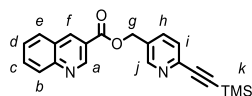

To **S5** (0.343 g, 1.0 mmol, 1 eq.), [Pd(PPh<sub>3</sub>)<sub>2</sub>Cl<sub>2</sub>] (0.018 g, 0.025 mmol, 2.5 mol%) and CuI (0.010 g, 0.05 mmol, 5 mol%) in <sup>i</sup>Pr<sub>2</sub>NH (5 mL) was added trimethylsilylacetylene (0.21 mL, 1.5 mmol, 1.5 eq.) via syringe. After stirring at rt for 28 h, EDTA solution (20 mL) was added and the aqueous phase was extracted with CH<sub>2</sub>Cl<sub>2</sub> (3 × 15 mL). The combined organic phases were dried (MgSO<sub>4</sub>) and the solvent removed *in vacuo*. After purification by column chromatography (1<sup>st</sup> column 1:19 acetone/CH<sub>2</sub>Cl<sub>2</sub>; 2<sup>nd</sup> column 0→30% EtOAc in pentane in 10% increments) the product was obtained as an off-white solid (0.266 g, 74%).

<sup>1</sup>H NMR (400 MHz, CDCl<sub>3</sub>) δ: 9.45 (d, *J* = 2.1 Hz, 1H, H<sub>a</sub>), 8.85 (dd, *J* = 2.2, 0.9 Hz, 1H, H<sub>f</sub>), 8.71 (dd, *J* = 2.3, 0.9 Hz, 1H, H<sub>j</sub>), 8.17 (dd, *J* = 8.5, 1.0 Hz, 1H, H<sub>e</sub>), 7.94 (dd, *J* = 8.1, 1.3 Hz, 1H, H<sub>b</sub>), 7.86 (ddd, *J* = 8.5, 6.9, 1.5 Hz, 1H, H<sub>d</sub>), 7.79 (dd, *J* = 8.1, 2.3 Hz, 1H, H<sub>h</sub>), 7.64 (ddd, *J* = 8.2, 6.9, 1.2 Hz, 1H, H<sub>c</sub>), 7.51 (dd, *J* = 8.0, 0.9 Hz, 1H, H<sub>i</sub>), 5.46 (s, 2H, H<sub>g</sub>), 0.27 (s, 9H, H<sub>k</sub>).

<sup>13</sup>C NMR (101 MHz, CDCl<sub>3</sub>) δ: 165.2, 150.1, 150.1 (C<sub>j</sub>), 150.0 (C<sub>a</sub>), 143.4, 139.2 (C<sub>f</sub>), 136.5 (C<sub>h</sub>), 132.3 (C<sub>d</sub>), 130.8, 129.7 (C<sub>e</sub>), 129.3 (C<sub>b</sub>), 127.8 (C<sub>c</sub>), 127.3 (C<sub>i</sub>), 126.9, 122.6, 103.4, 95.9, 64.4 (C<sub>g</sub>), -0.2 (C<sub>k</sub>).

HR-ESI-MS *m/z* = 361.1454 [M+H]<sup>+</sup> calc. 361.1367.

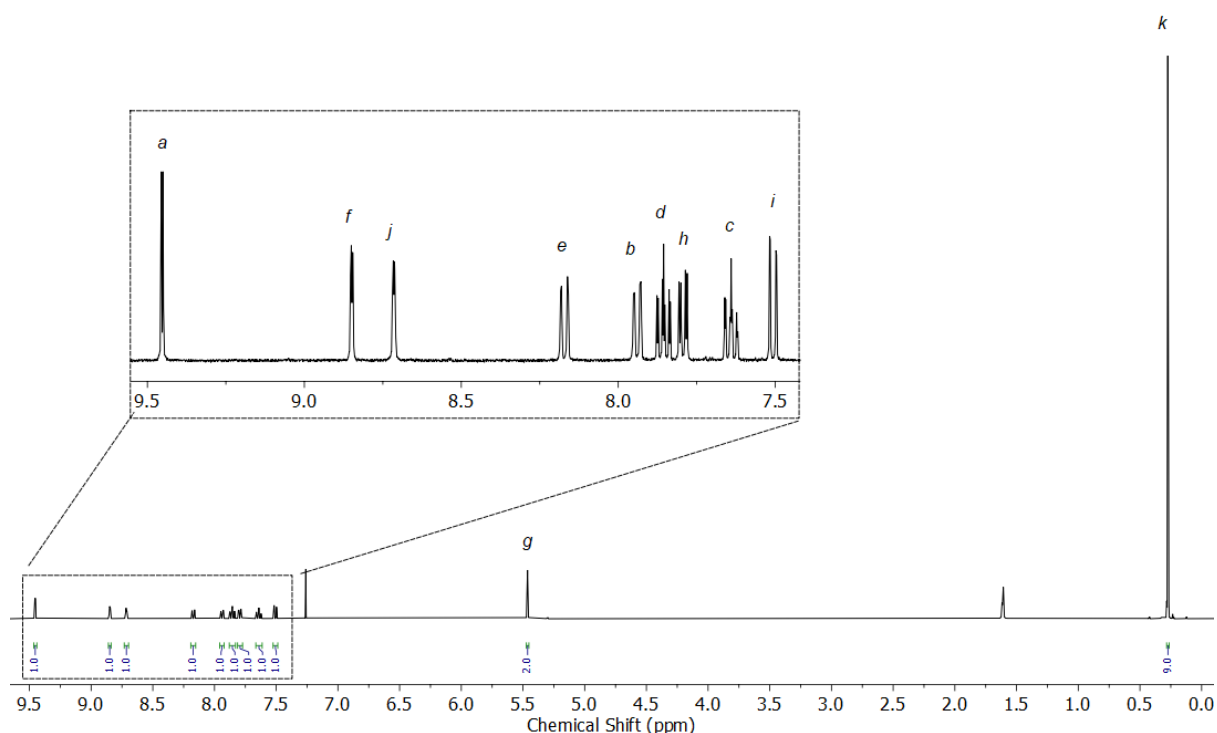

Figure S38 <sup>1</sup>H NMR (400 MHz, CDCl<sub>3</sub>) of **S6**.



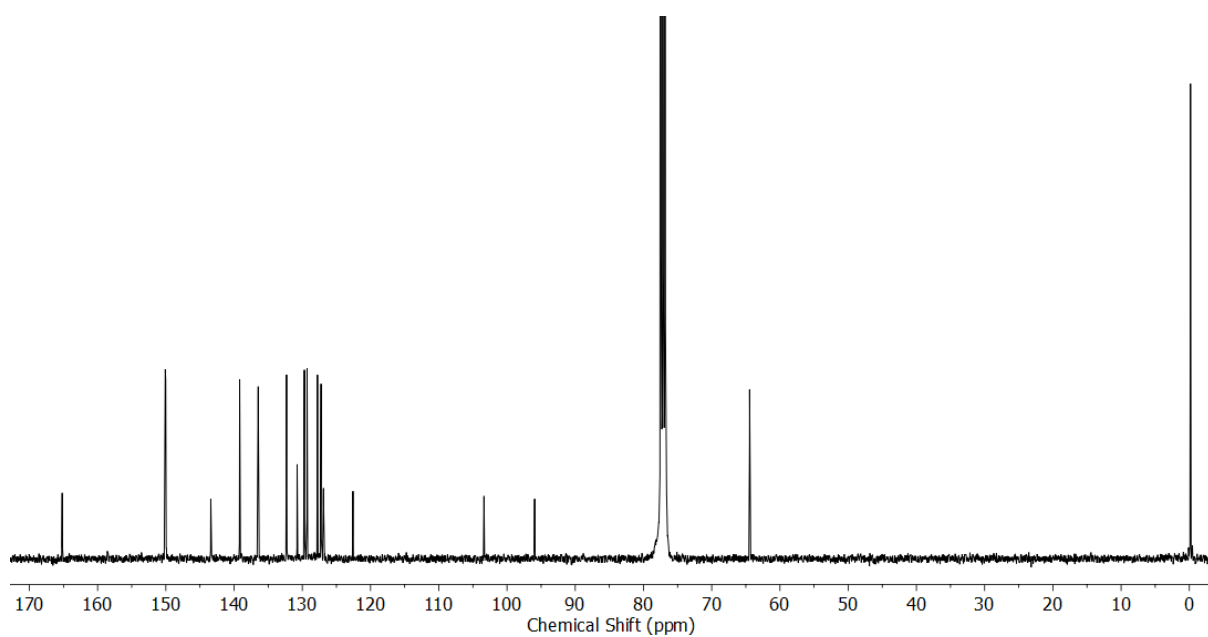

Figure S39  $^{13}\text{C}$  NMR (101 MHz,  $\text{CDCl}_3$ ) of **S6**.

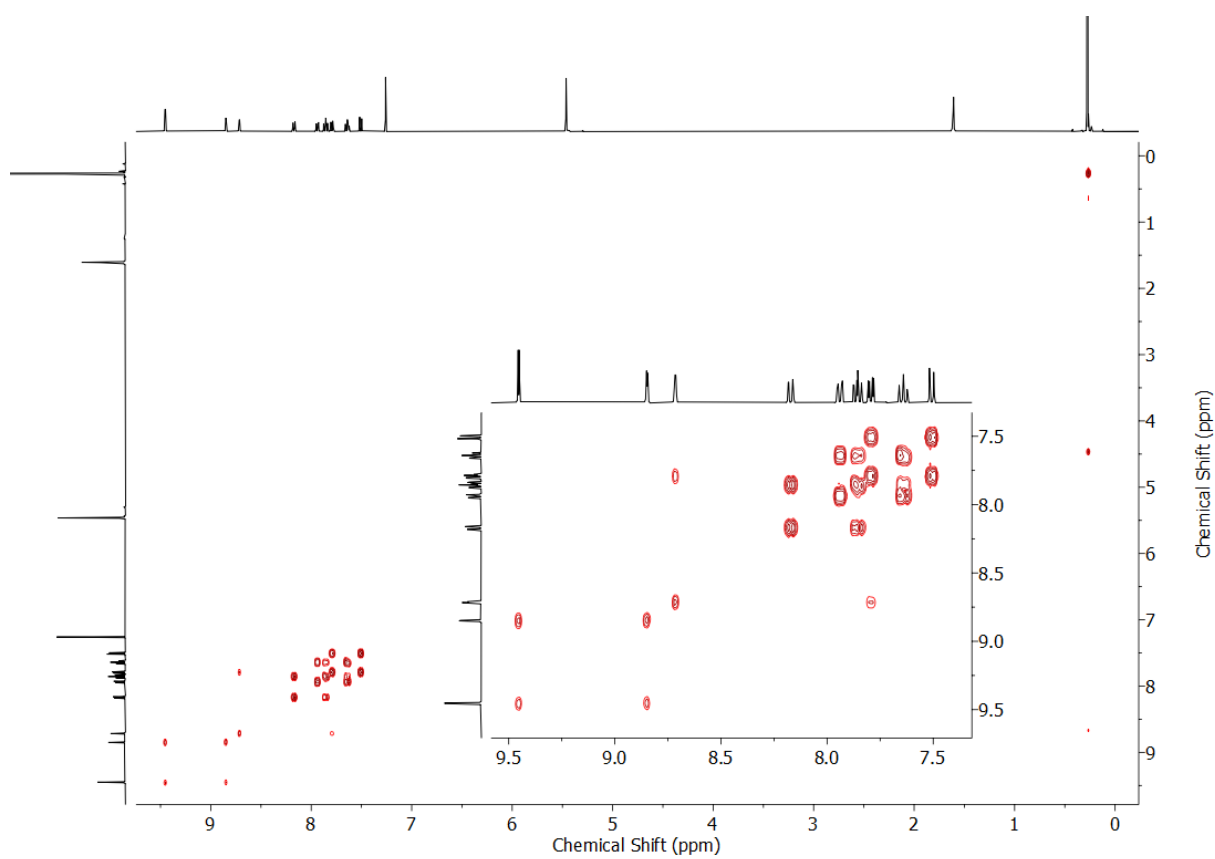

Figure S40 COSY NMR ( $\text{CDCl}_3$ ) of **S6**.

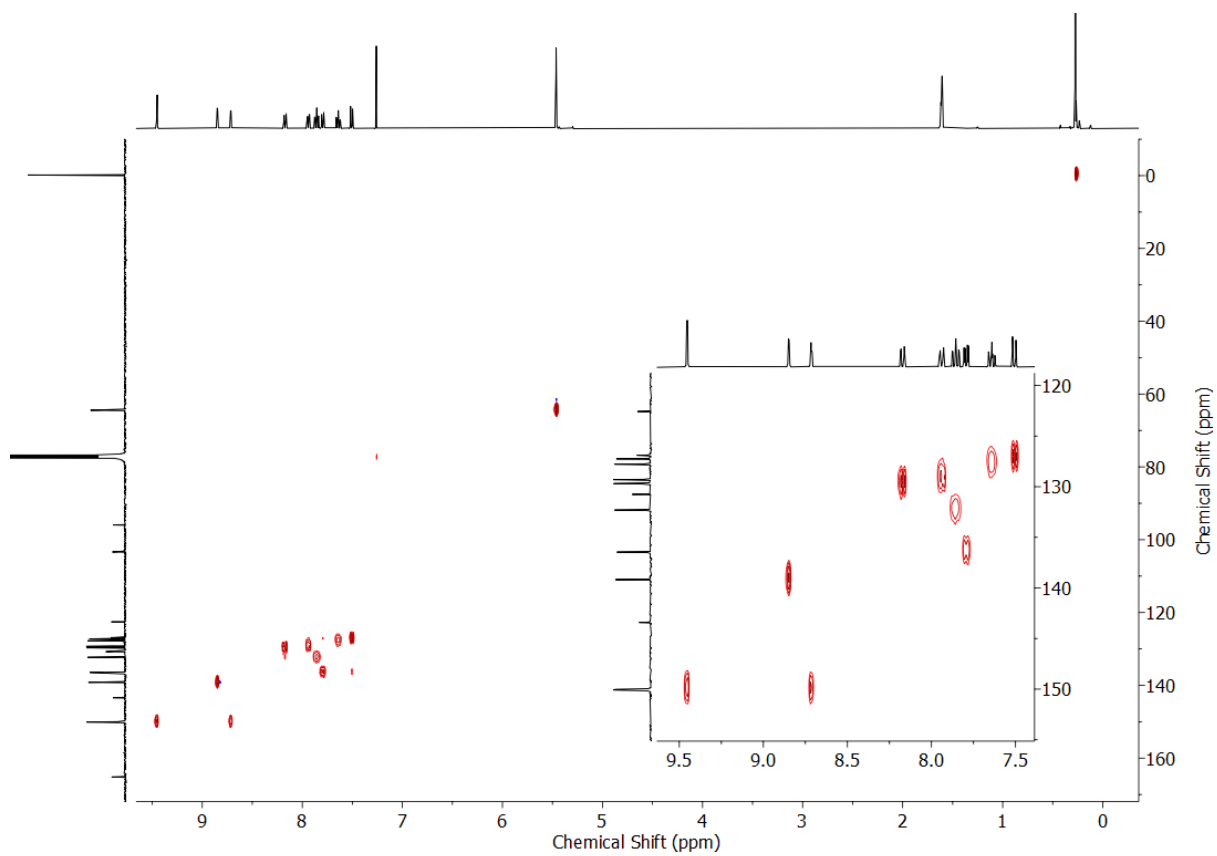

Figure S41 HSQC NMR ( $\text{CDCl}_3$ ) of **S6**.

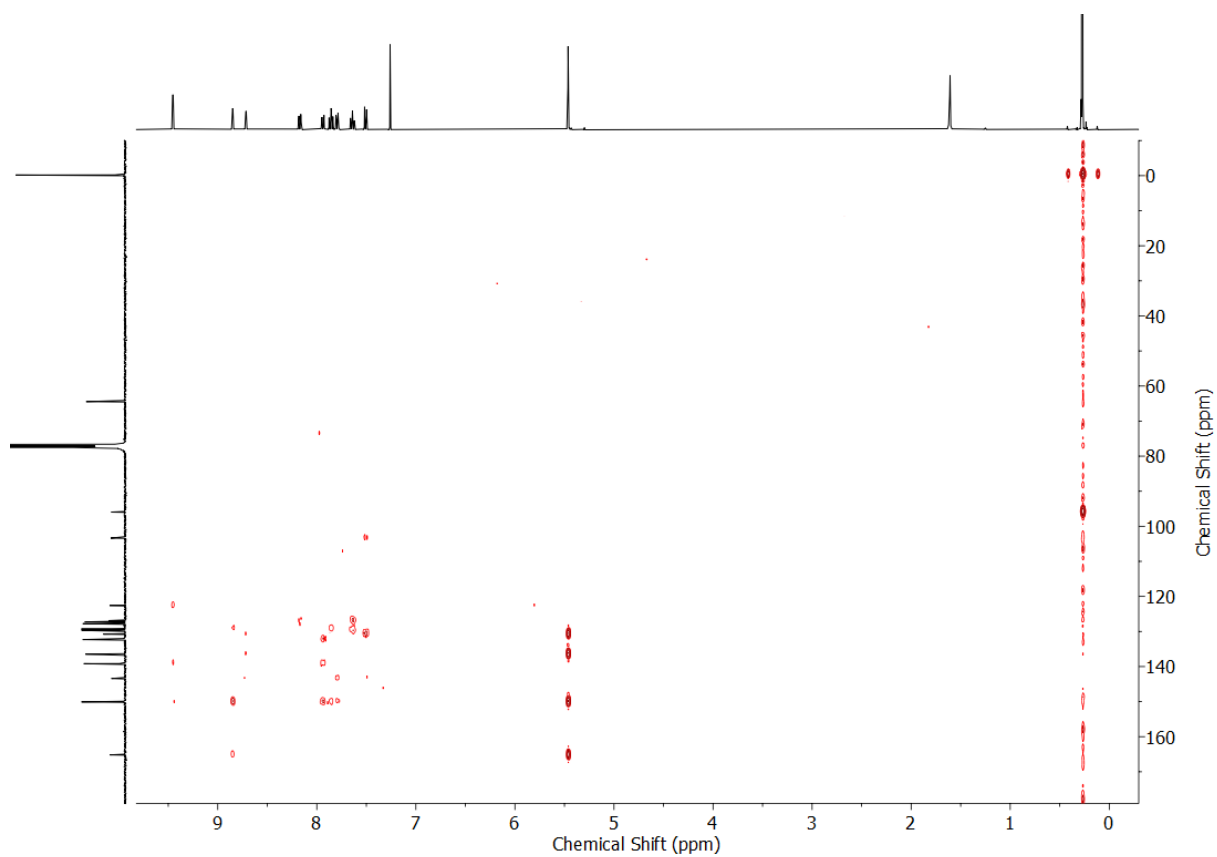

Figure S42 HMBC NMR ( $\text{CDCl}_3$ ) of **S6**.

## Synthesis of L<sup>P3Q</sup>

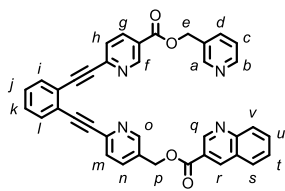

To a solution of **S4** (0.0817 g, 0.186 mmol, 1 eq.), **S6** (0.0669 g, 0.186 mmol, 1 eq.), Pd(PPh<sub>3</sub>)<sub>4</sub> (0.0107 g, 0.0093 mmol, 5 mol%) and CuI (0.0018 g, 0.0093 mmol, 5 mol%) in MeCN (1.9 mL) was added DBU (0.17 mL, 1.1 mmol, 6 eq.). After stirring at rt for 21 h, EDTA solution (20 mL) was added. The aqueous phase was extracted with CH<sub>2</sub>Cl<sub>2</sub> (3 × 10 mL), the combined organic phases dried (MgSO<sub>4</sub>) and the solvent removed *in vacuo*. After purification by column chromatography on silica gel (0→40% acetone in CH<sub>2</sub>Cl<sub>2</sub> in 10% increments) the product was obtained as a light yellow solid (0.0592 g, 53%).

<sup>1</sup>H NMR (400 MHz, CDCl<sub>3</sub>) δ: 9.46 (d, *J* = 1.6 Hz, 1H, H<sub>q</sub>), 9.23 (d, *J* = 1.7 Hz, 1H, H<sub>f</sub>), 8.86 (d, *J* = 1.9 Hz, 1H, H<sub>r</sub>), 8.79 (d, *J* = 1.5 Hz, 1H, H<sub>o</sub>), 8.75 (br. m, 1H, H<sub>a</sub>), 8.63 (br. m, 1H, H<sub>b</sub>), 8.29 (dd, *J* = 8.2, 2.2 Hz, 1H, H<sub>g</sub>), 8.17 (d, *J* = 8.5 Hz, 1H, H<sub>v</sub>), 7.94 (d, *J* = 8.2 Hz, 1H, H<sub>s</sub>), 7.87-7.78 (m, 4H, H<sub>d</sub>, H<sub>h</sub>, H<sub>n</sub>, H<sub>u</sub>), 7.75 (d, *J* = 8.0 Hz, 1H, H<sub>m</sub>), 7.67-7.61 (m, 3H, H<sub>i</sub>, H<sub>j</sub>, H<sub>t</sub>), 7.43-7.37 (m, 2H, H<sub>k</sub>, H<sub>l</sub>), 7.34 (m, 1H, H<sub>c</sub>), 5.49 (s, 2H, H<sub>p</sub>), 5.41 (s, 2H, H<sub>e</sub>).

<sup>13</sup>C NMR (101 MHz, CDCl<sub>3</sub>) δ: 165.2, 164.7, 151.3 (C<sub>f</sub>), 150.3 (C<sub>o</sub>), 150.1, 150.0, 150.0 (C<sub>q</sub>), 149.9, 147.4, 143.6, 139.2 (C<sub>r</sub>), 137.4 (C<sub>g</sub>), 136.6 (C<sub>d</sub>/C<sub>h</sub>/C<sub>n</sub>/C<sub>u</sub>), 136.4 (C<sub>d</sub>/C<sub>h</sub>/C<sub>n</sub>/C<sub>u</sub>), 132.6 (C<sub>i</sub>/C<sub>j</sub>/C<sub>t</sub>), 132.5 (C<sub>i</sub>/C<sub>j</sub>/C<sub>t</sub>), 132.3 (C<sub>d</sub>/C<sub>h</sub>/C<sub>n</sub>/C<sub>u</sub>), 130.8, 129.6 (C<sub>v</sub>), 129.5 (C<sub>k</sub>/C<sub>l</sub>), 129.3 (C<sub>s</sub>), 129.1 (C<sub>k</sub>/C<sub>l</sub>), 127.8 (C<sub>i</sub>/C<sub>j</sub>/C<sub>t</sub>), 127.6 (C<sub>m</sub>), 127.4 (C<sub>d</sub>/C<sub>h</sub>/C<sub>n</sub>/C<sub>u</sub>), 126.9, 125.7, 125.0, 124.3, 123.8 (C<sub>c</sub>) 122.6, 93.0, 92.6, 91.0, 88.3, 64.8 (C<sub>e</sub>), 64.5 (C<sub>p</sub>) (1 signal missing due to peak overlap).

HR-ESI-MS *m/z* = 601.1871 [M+H]<sup>+</sup> calc. 601.1876.

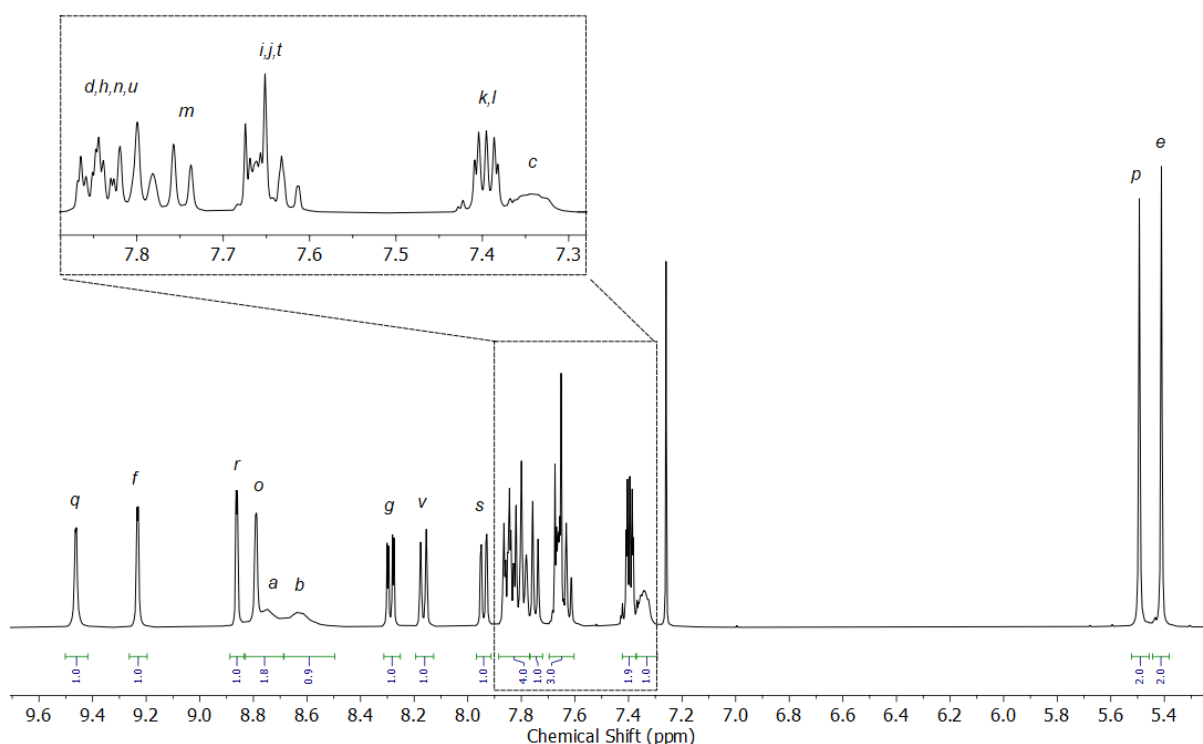

Figure S43  $^1\text{H}$  NMR (400 MHz,  $\text{CDCl}_3$ ) of  $\text{L}^{\text{P3Q}}$ .

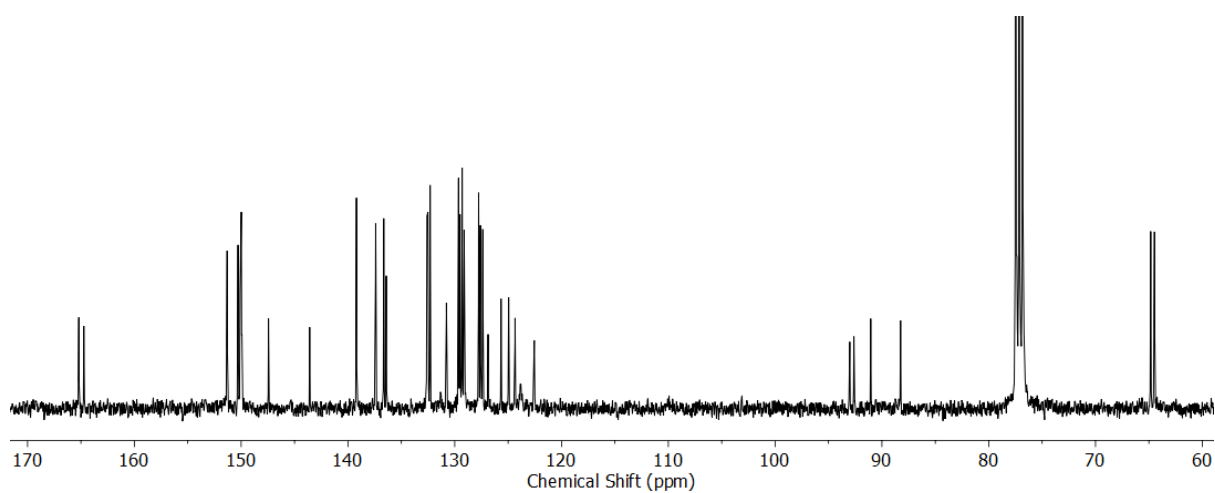

Figure S44  $^{13}\text{C}$  NMR (101 MHz,  $\text{CDCl}_3$ ) of  $\text{L}^{\text{P3Q}}$ .

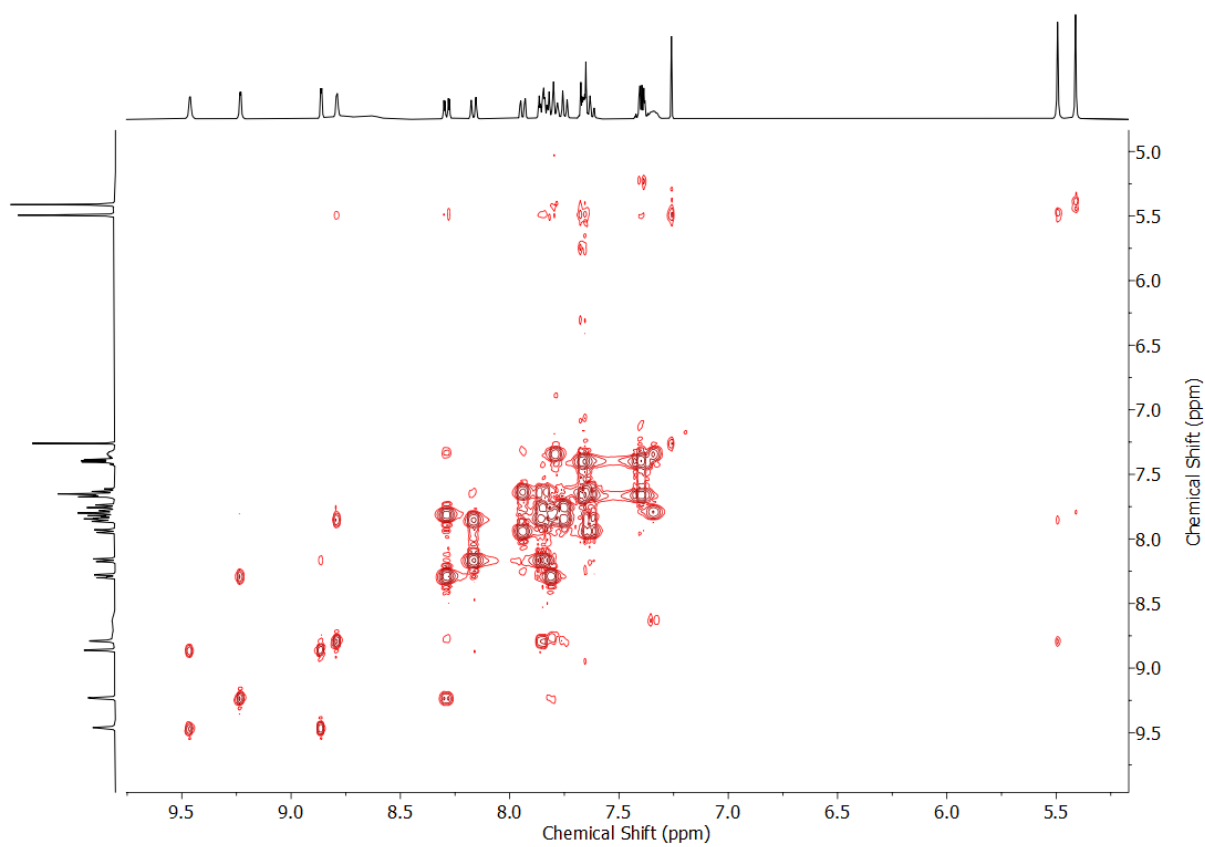

Figure S45 COSY NMR ( $\text{CDCl}_3$ ) of  $\text{L}^{\text{P3Q}}$ .

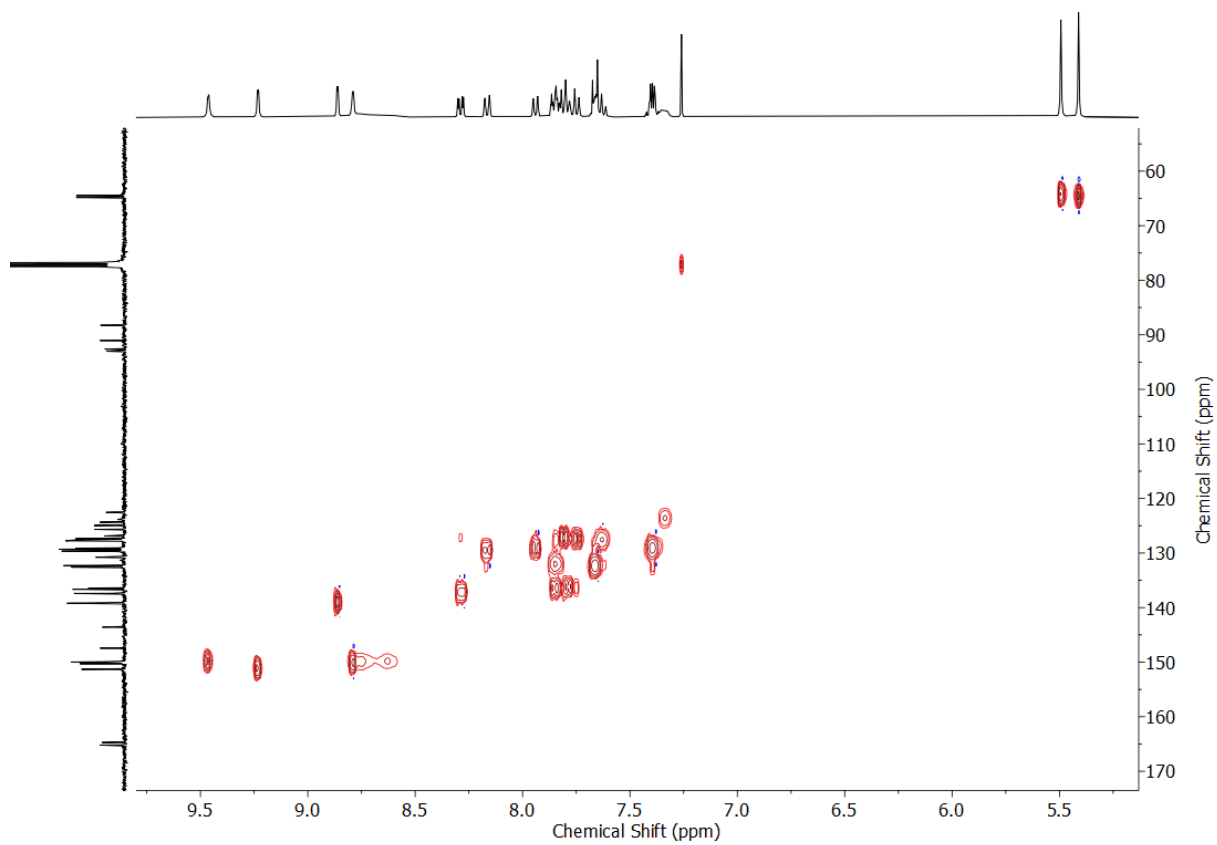

Figure S46 HSQC NMR ( $\text{CDCl}_3$ ) of  $\text{L}^{\text{P}3\text{Q}}$ .

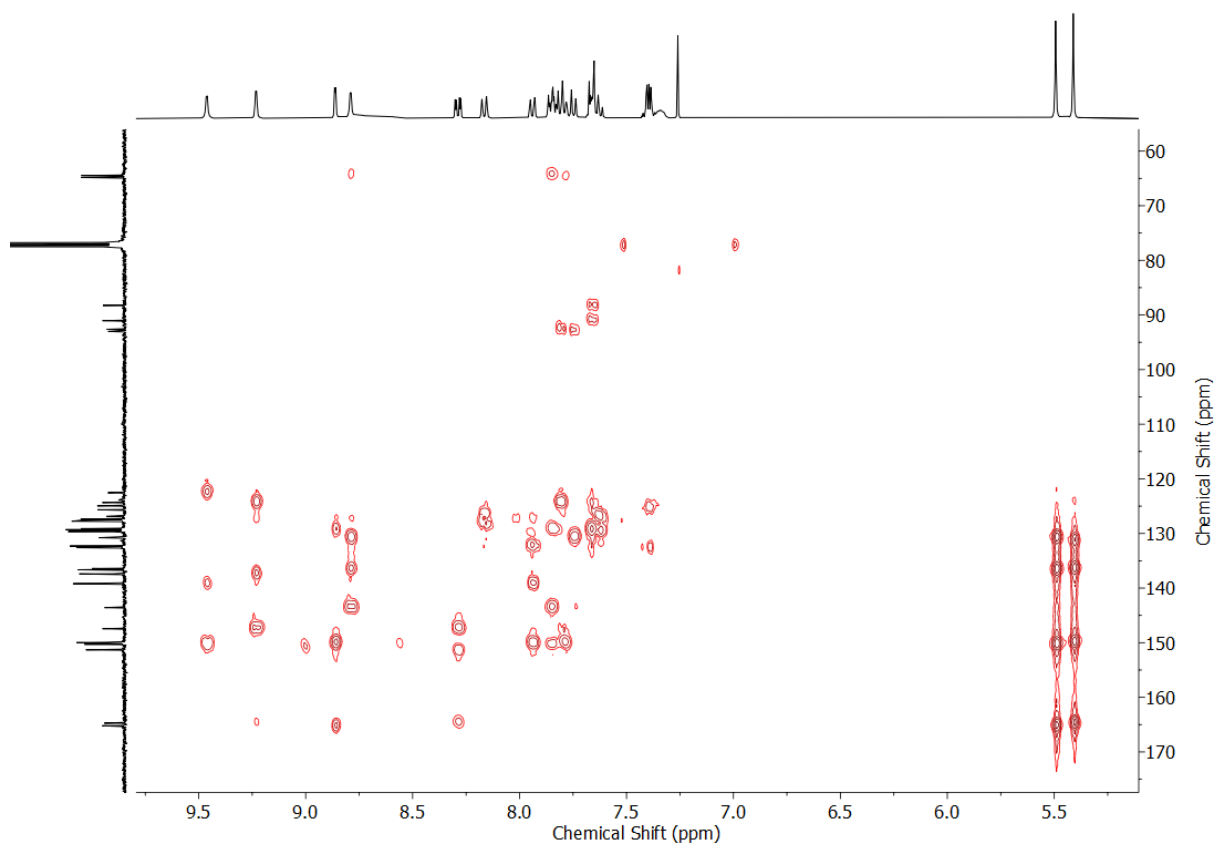

Figure S47 HMBC NMR ( $\text{CDCl}_3$ ) of  $\text{L}^{\text{P}3\text{Q}}$ .

## Synthesis of $[\text{Pd}_2(\text{L}^{\text{P}3\text{Q}})_2\text{NO}_3](\text{NO}_3)_3$ ( $\text{C}^{\text{P}3\text{Q}}$ )

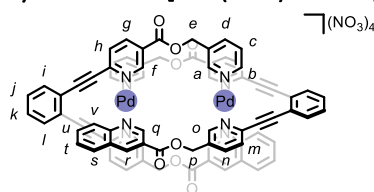

$\text{L}^{\text{P}3\text{Q}}$  (12.0 mg, 20  $\mu\text{mol}$ , 1 eq.) and  $\text{Pd}(\text{NO}_3)_2 \cdot 2\text{H}_2\text{O}$  (5.3 mg, 20  $\mu\text{mol}$ , 1 eq.) were sonicated in  $d_6$ -DMSO (0.75 mL) until a solution was obtained. After standing at 50  $^\circ\text{C}$  for 2 h,  $^1\text{H}$  NMR demonstrated quantitative conversion to  $\text{C}^{\text{P}4\text{Q}}$ . The solution was diluted with MeCN (0.75 mL), filtered through celite and left for vapour diffusion of  $\text{Et}_2\text{O}$ . After 1 week the mother liquor was carefully decanted and the precipitate washed with  $\text{Et}_2\text{O}$  and dried *in vacuo* to give the product as a light yellow solid (12.6 mg, 76%).

$^1\text{H}$  NMR (500 MHz,  $d_6$ -DMSO)  $\delta$ : 11.34 (d,  $J = 1.7$  Hz, 2H,  $\text{H}_q$ ), 10.68-10.66 (m, 4H,  $\text{H}_f$ ,  $\text{H}_v$ ), 10.00 (s, 2H,  $\text{H}_o$ ), 9.56 (m, 2H,  $\text{H}_r$ ), 9.10 (s, 2H,  $\text{H}_a$ ), 8.77 (d,  $J = 6.0$  Hz, 2H,  $\text{H}_b$ ), 8.62 (dd,  $J = 8.2, 1.8$  Hz, 2H,  $\text{H}_g$ ), 8.41 (m, 2H,  $\text{H}_s$ ), 8.34 (m, 2H,  $\text{H}_n$ ), 8.27-8.24 (m, 4H,  $\text{H}_h$ , 1 of  $\text{H}_i$ ,  $\text{H}_j$ ,  $\text{H}_k$ ,  $\text{H}_l$ ), 8.13-8.11 (m, 4H,  $\text{H}_d$ , 1 of  $\text{H}_i$ ,  $\text{H}_j$ ,  $\text{H}_k$ ,  $\text{H}_l$ ), 8.08 (d,  $J = 8.2$  Hz, 3H,  $\text{H}_m$ ), 8.00-7.95 (m, 4H, 2 of  $\text{H}_i$ ,  $\text{H}_j$ ,  $\text{H}_k$ ,  $\text{H}_l$ ), 7.87-7.81 (m, 4H,  $\text{H}_t$ ,  $\text{H}_u$ ), 7.59 (dd,  $J = 7.7, 6.1$  Hz, 2H,  $\text{H}_c$ ), 5.73 (d,  $J = 15.8$  Hz, 2H,  $\text{H}_p$ ), 5.51 (d,  $J = 15.6$  Hz, 2H,  $\text{H}_p'$ ), 5.41 (d,  $J = 13.4$  Hz, 2H,  $\text{H}_e$ ), 5.11 (d,  $J = 13.5$  Hz, 2H,  $\text{H}_e'$ ).

**Diffusion coefficient** (500 MHz,  $d_6$ -DMSO)  $D$ :  $1.13 \times 10^{-10} \text{ m}^2\text{s}^{-1}$ ;  $R_H$ : 8.86  $\text{\AA}$ .

$^{13}\text{C}$  NMR (126 MHz,  $d_6$ -DMSO)  $\delta$ : 163.2, 162.2, 155.1 ( $\text{C}_f/\text{C}_q$ ), 155.1 ( $\text{C}_f/\text{C}_q$ ), 152.4 ( $\text{C}_a$ ), 151.2 ( $\text{C}_b$ ), 150.9 ( $\text{C}_o$ ), 146.4, 145.4 ( $\text{C}_r$ ), 145.2, 141.9, 141.7 ( $\text{C}_g$ ), 141.4 ( $\text{C}_d/\text{C}_i/\text{C}_j/\text{C}_k/\text{C}_l$ ), 140.6 ( $\text{C}_n$ ), 135.9, 134.3 ( $\text{C}_i/\text{C}_j/\text{C}_k/\text{C}_l$ ), 134.1 ( $\text{C}_t/\text{C}_u$ ), 133.8 ( $\text{C}_d/\text{C}_i/\text{C}_j/\text{C}_k/\text{C}_l$ ), 132.8 ( $\text{C}_i/\text{C}_j/\text{C}_k/\text{C}_l$ ), 132.3 ( $\text{C}_i/\text{C}_j/\text{C}_k/\text{C}_l$ ), 131.9 ( $\text{C}_h$ ), 131.4 ( $\text{C}_s$ ), 130.9 ( $\text{C}_m$ ), 129.8 ( $\text{C}_t/\text{C}_u$ ), 128.4, 128.1, 127.2 ( $\text{C}_v$ ), 126.5 ( $\text{C}_c$ ), 125.2, 122.8, 122.1, 100.3, 97.0, 91.4, 90.8, 65.4 ( $\text{C}_e/\text{C}_p$ ), 65.3 ( $\text{C}_e/\text{C}_p$ ) (1 peak missing due to overlap).

**ESI-MS**  $m/z = 491.98$   $\{[\text{Pd}_2(\text{L}^{\text{P}3\text{Q}})_2](\text{NO}_3)\}^{3+}$  calc. 492.05; 768.97  $\{[\text{Pd}_2(\text{L}^{\text{P}3\text{Q}})_2](\text{NO}_3)_2\}^{2+}$  calc. 769.07.

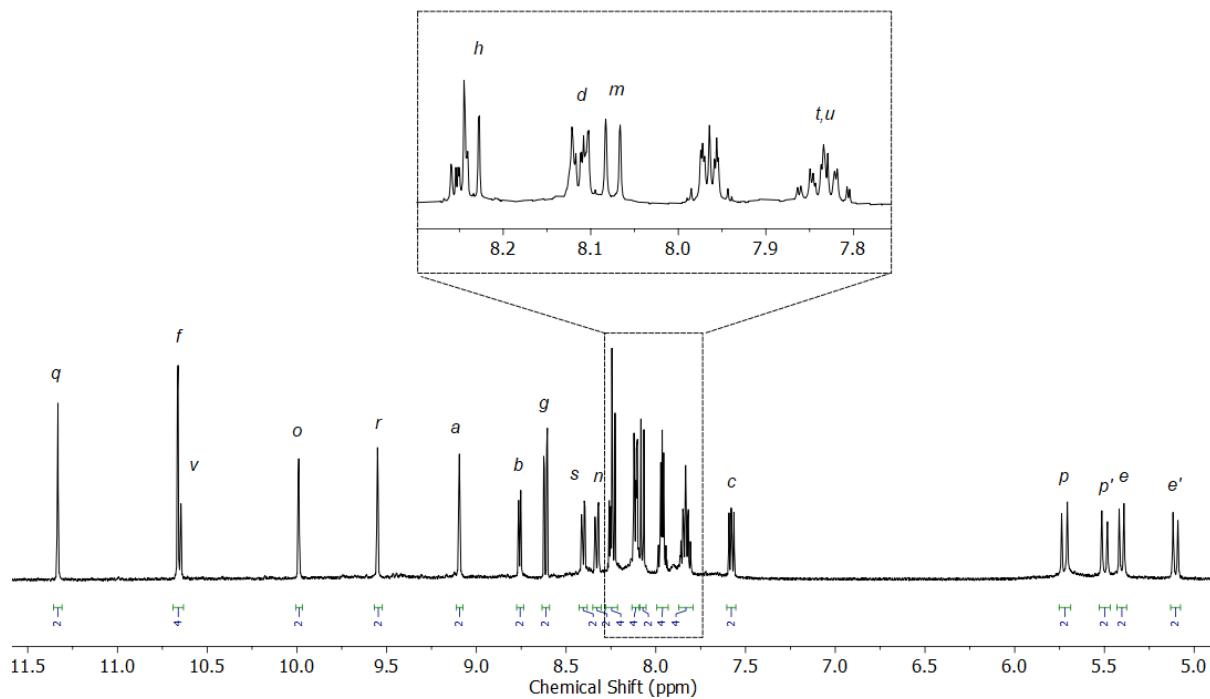

Figure S48  $^1\text{H}$  NMR (500 MHz,  $d_6$ -DMSO) of  $[\text{Pd}_2(\text{L}^{\text{P3Q}})_2](\text{NO}_3)_4$ .

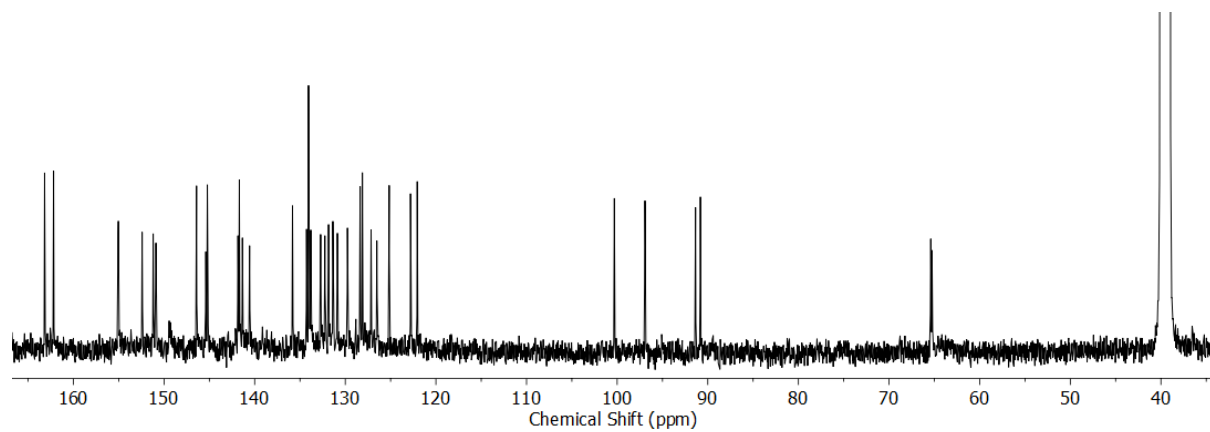

Figure S49  $^{13}\text{C}$  NMR (126 MHz,  $d_6$ -DMSO) of  $[\text{Pd}_2(\text{L}^{\text{P3Q}})_2](\text{NO}_3)_4$ .

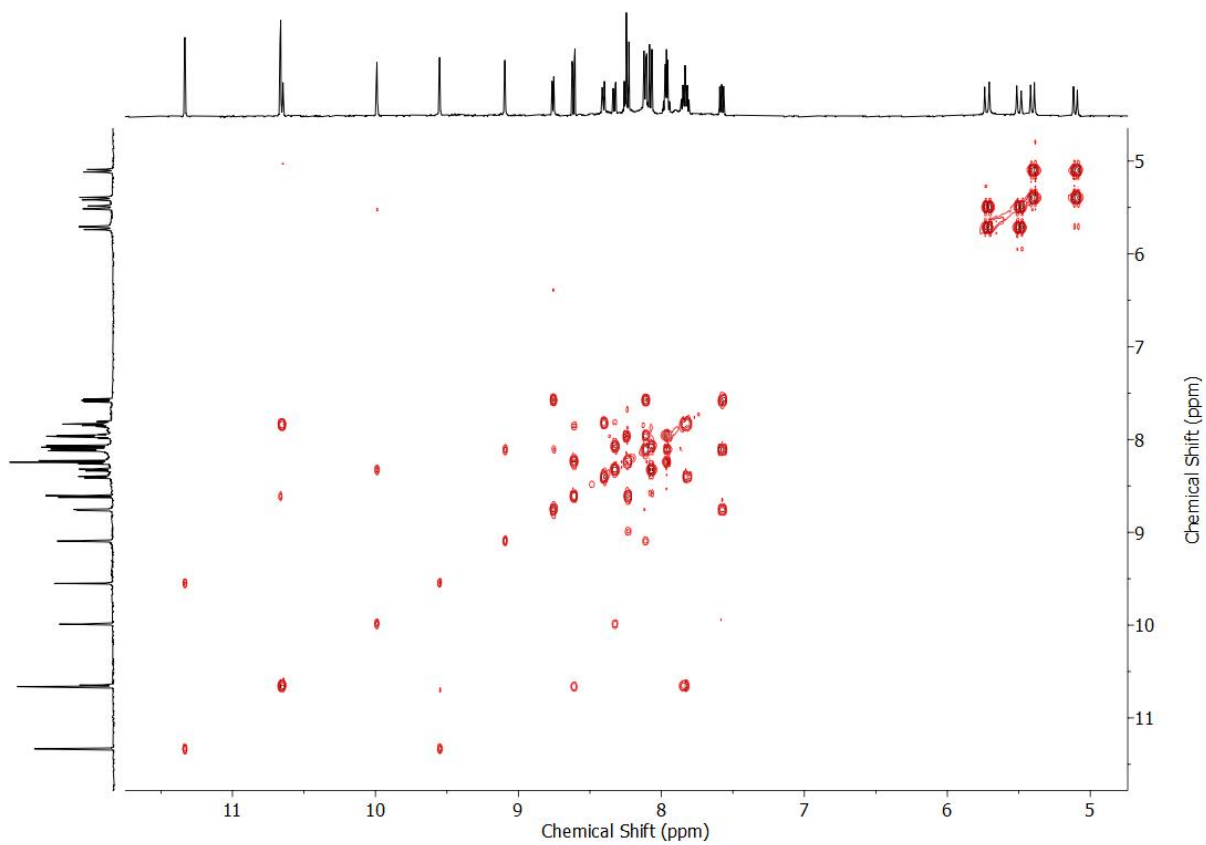

Figure S50 COSY NMR ( $d_6$ -DMSO) of  $[\text{Pd}_2(\text{L}^{\text{P3Q}})_2](\text{NO}_3)_4$ .

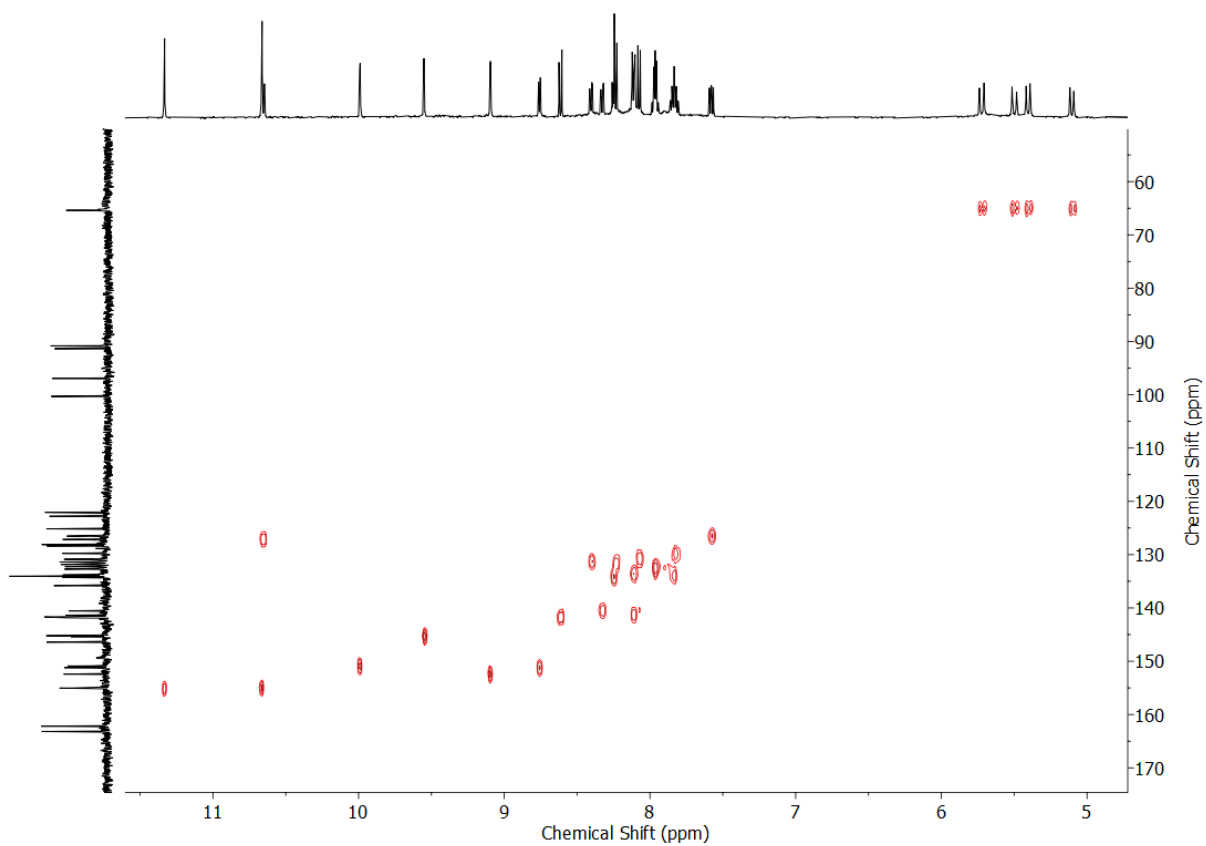

Figure S51 HSQC NMR ( $d_6$ -DMSO) of  $[\text{Pd}_2(\text{L}^{\text{P3Q}})_2](\text{NO}_3)_4$ .



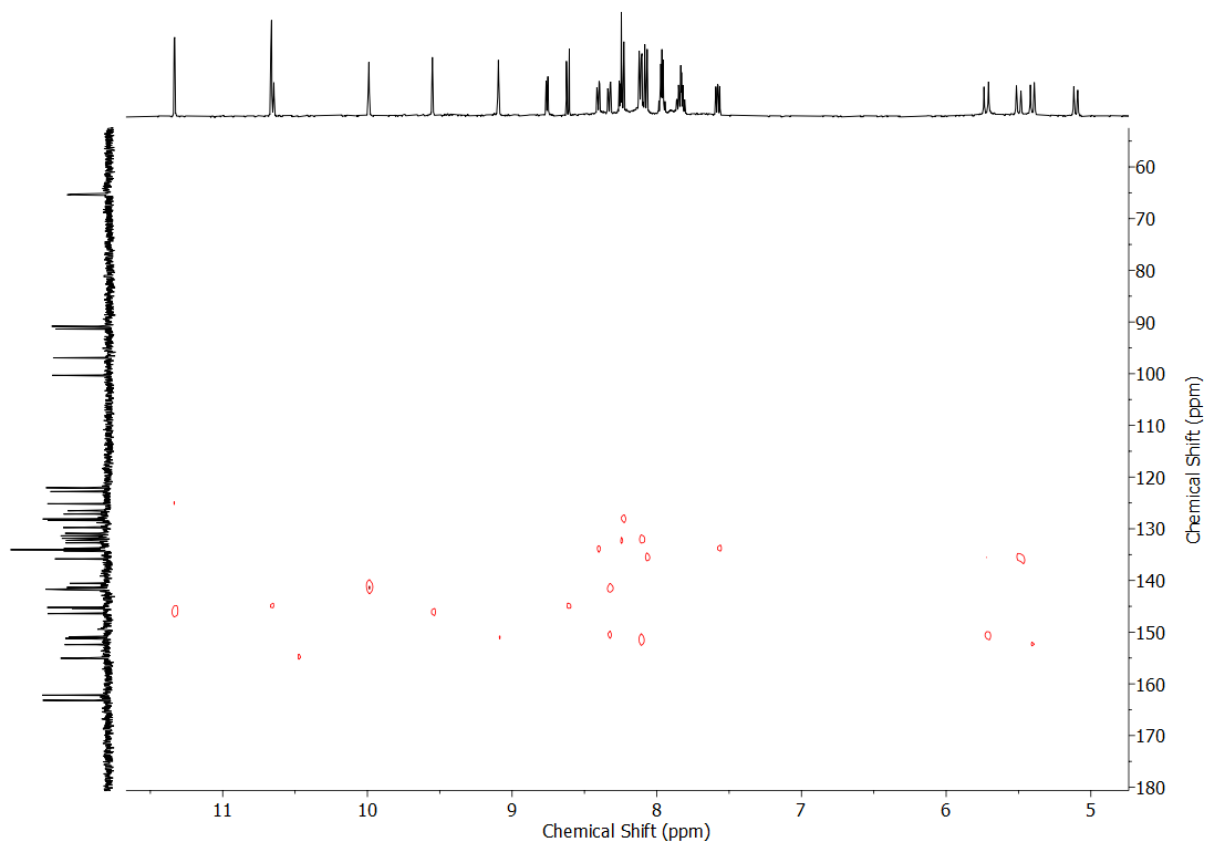

Figure S52 HMBC NMR ( $d_6$ -DMSO) of  $[\text{Pd}_2(\text{L}^{\text{P}3\text{O}})_2](\text{NO}_3)_4$ .

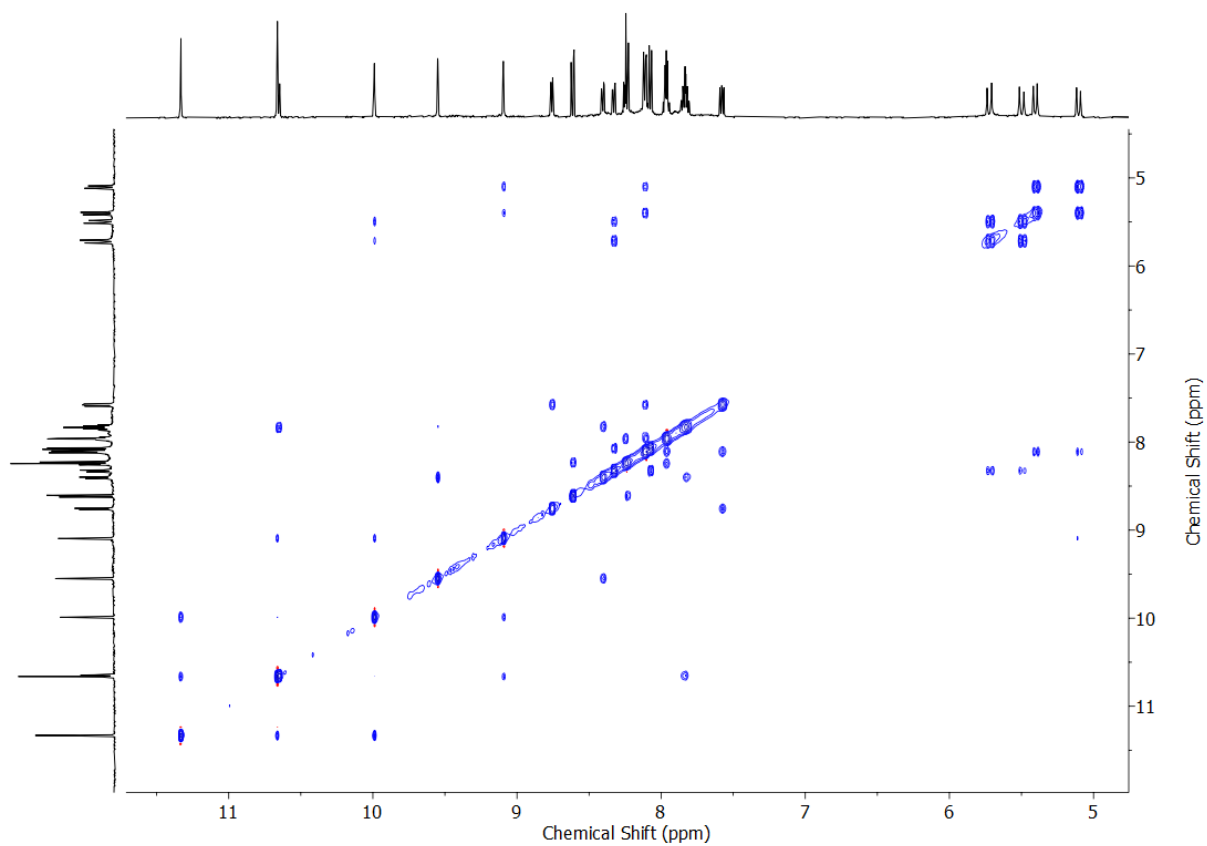

Figure S53 NOESY ( $d_6$ -DMSO) of  $[\text{Pd}_2(\text{L}^{\text{P}3\text{O}})_2](\text{NO}_3)_4$ .

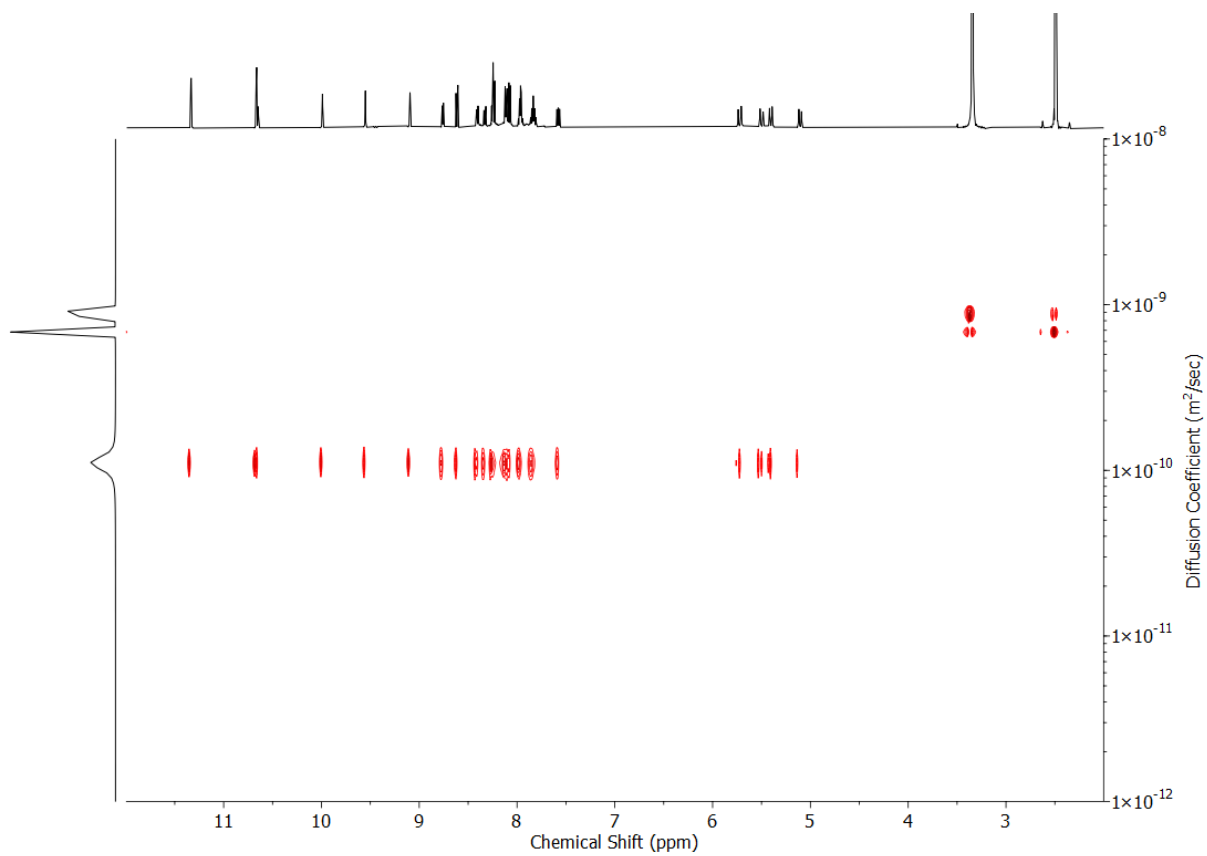

Figure S54 DOSY ( $d_6$ -DMSO) of  $[\text{Pd}_2(\text{L}^{\text{P3Q}})_2](\text{NO}_3)_4$ .

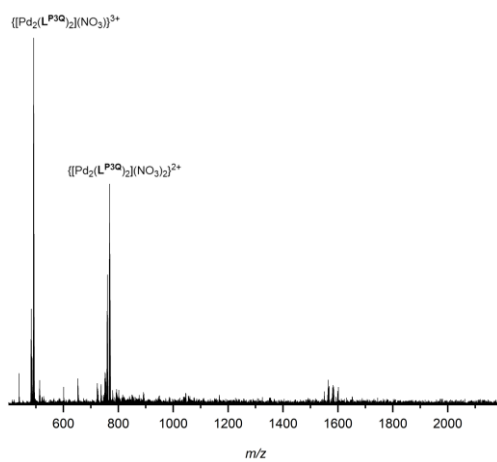

Figure S55 ESI-MS of  $[\text{Pd}_2(\text{L}^{\text{P3Q}})_2](\text{NO}_3)_4$ .

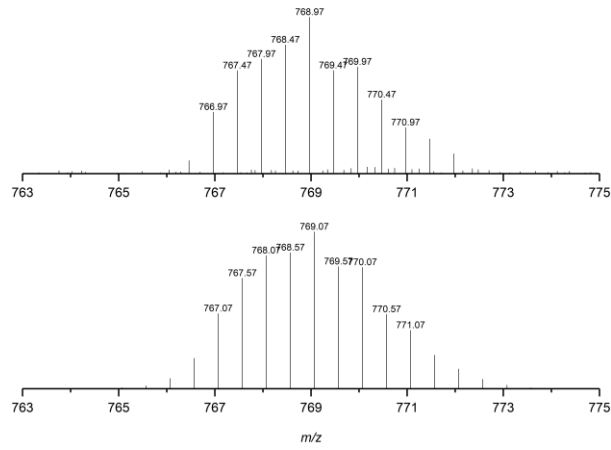

Figure S56 Observed (top) and calculated (bottom) isotopic patterns for  $\{[\text{Pd}_2(\text{L}^{\text{P}3\text{Q}})_2](\text{NO}_3)_2\}^{2+}$ .

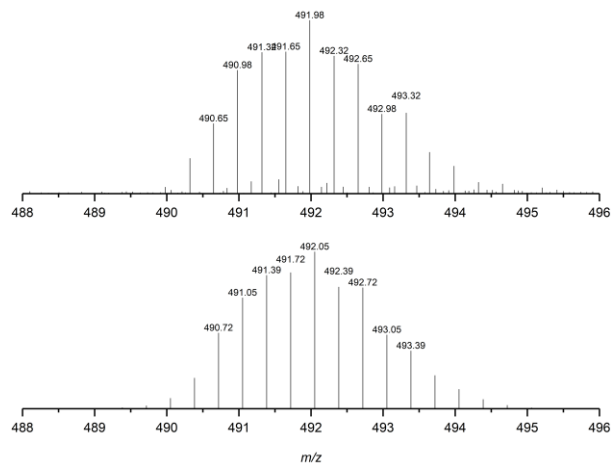

Figure S57 Observed (top) and calculated (bottom) isotopic patterns for  $\{[\text{Pd}_2(\text{L}^{\text{P}3\text{Q}})_2](\text{NO}_3)_2\}^{3+}$ .

## Synthesis of S7

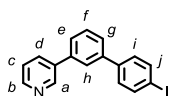

(3-(Pyridin-3-yl)phenyl)boronic acid (0.597 g, 3 mmol, 1 eq.), 1,4-diiodobenzene (1.93 g, 4.5 mmol, 1.5 eq.), Pd(PPh<sub>3</sub>)<sub>2</sub>Cl<sub>2</sub> (0.053 g, 0.075 mmol, 2.5 mol%) and K<sub>2</sub>CO<sub>3</sub> (1.04 g, 7.5 mmol, 2.5 eq.) were stirred at 90 °C in 2:1 dioxane/H<sub>2</sub>O (9 mL) in a sealed vial for 24 h. H<sub>2</sub>O (20 mL) was added and the aqueous phase extracted with CH<sub>2</sub>Cl<sub>2</sub> (3 × 20 mL). The combined organic phases were dried (MgSO<sub>4</sub>) and the solvent removed *in vacuo*. After purification by column chromatography (5% acetone in 1:1 CH<sub>2</sub>Cl<sub>2</sub>/pentane) the product was obtained as an orange solid (0.265 g, 25%).

<sup>1</sup>H NMR (400 MHz, CDCl<sub>3</sub>) δ: 8.89 (d, *J* = 1.6 Hz, 1H, H<sub>a</sub>), 8.62 (dd, *J* = 4.8, 1.5 Hz, 1H, H<sub>b</sub>), 7.92 (ddd, *J* = 7.9, 2.2, 1.7 Hz, 1H, H<sub>d</sub>), 7.80 (d, *J* = 8.5 Hz, 2H, H<sub>i</sub>/H<sub>j</sub>), 7.73 (s, 1H, H<sub>h</sub>), 7.60-7.53 (m, 3H, H<sub>e</sub>, H<sub>f</sub>, H<sub>g</sub>), 7.41-7.37 (m, 3H, H<sub>c</sub>, H<sub>i</sub>/H<sub>j</sub>).

<sup>13</sup>C NMR (101 MHz, CDCl<sub>3</sub>) δ: 148.8 (C<sub>b</sub>), 148.5 (C<sub>a</sub>), 141.2, 140.4, 138.7, 138.1 (C<sub>i</sub>/C<sub>j</sub>), 136.6, 134.6 (C<sub>d</sub>), 129.8 (C<sub>e</sub>/C<sub>f</sub>/C<sub>g</sub>), 129.2 (C<sub>i</sub>/C<sub>j</sub>), 126.8 (C<sub>e</sub>/C<sub>f</sub>/C<sub>g</sub>), 126.6 (C<sub>e</sub>/C<sub>f</sub>/C<sub>g</sub>), 125.9 (C<sub>h</sub>), 123.8 (C<sub>c</sub>), 93.6.

HR-ESI-MS *m/z* = 358.0081 [M+H]<sup>+</sup> calc. 358.0093.

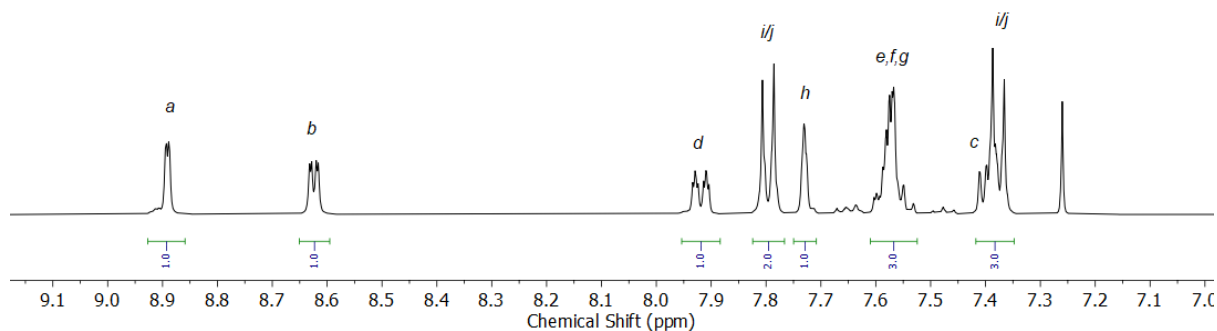

Figure S58 <sup>1</sup>H NMR (400 MHz, CDCl<sub>3</sub>) of S7.

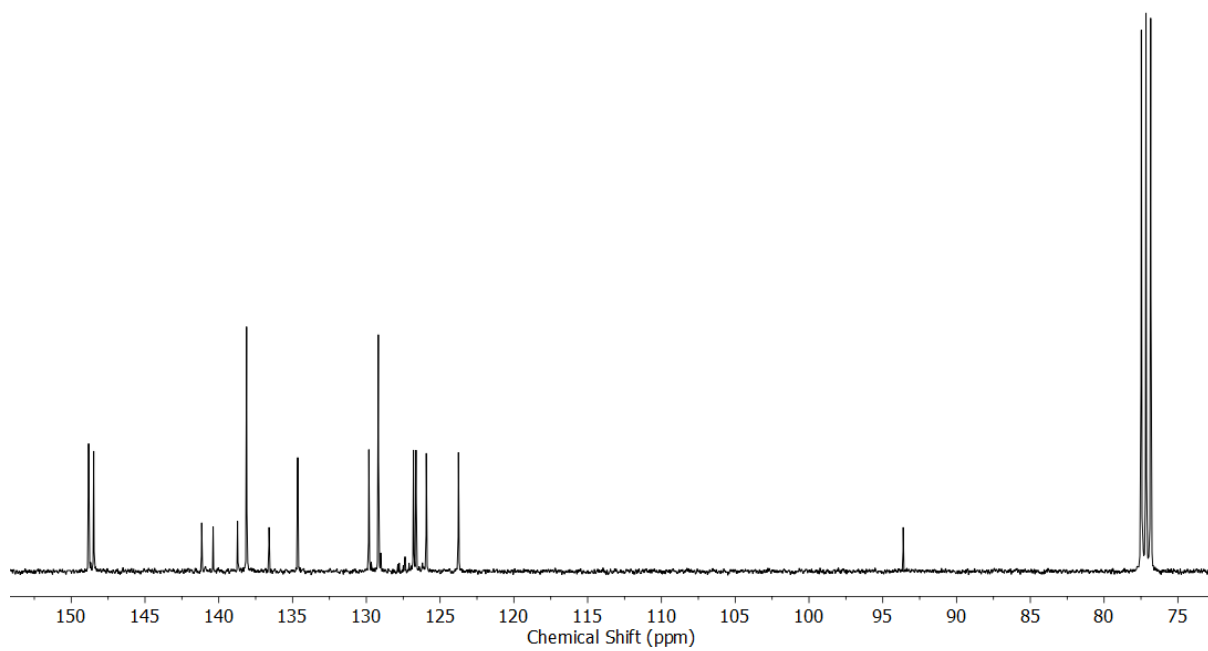

Figure S59  $^{13}\text{C}$  NMR (101 MHz,  $\text{CDCl}_3$ ) of **S7**.

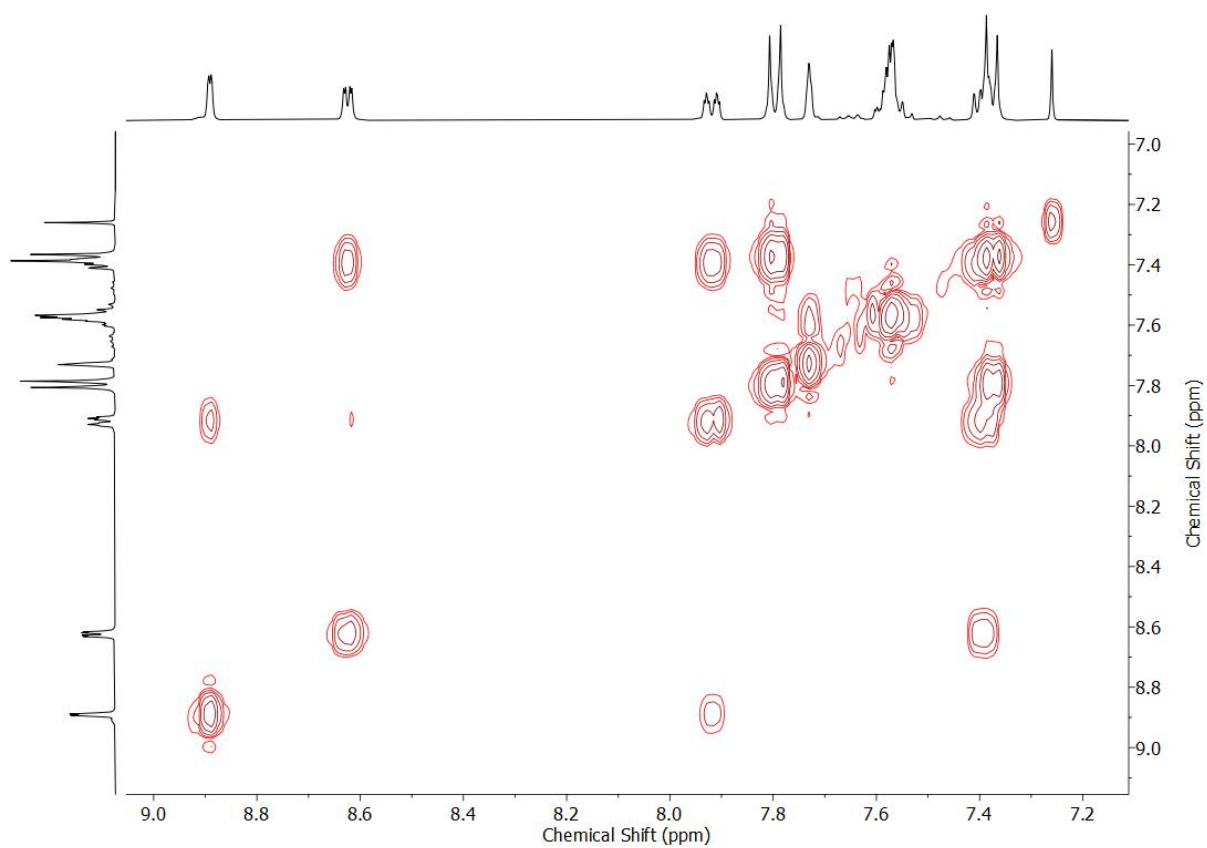

Figure S60 COSY NMR ( $\text{CDCl}_3$ ) of **S7**.

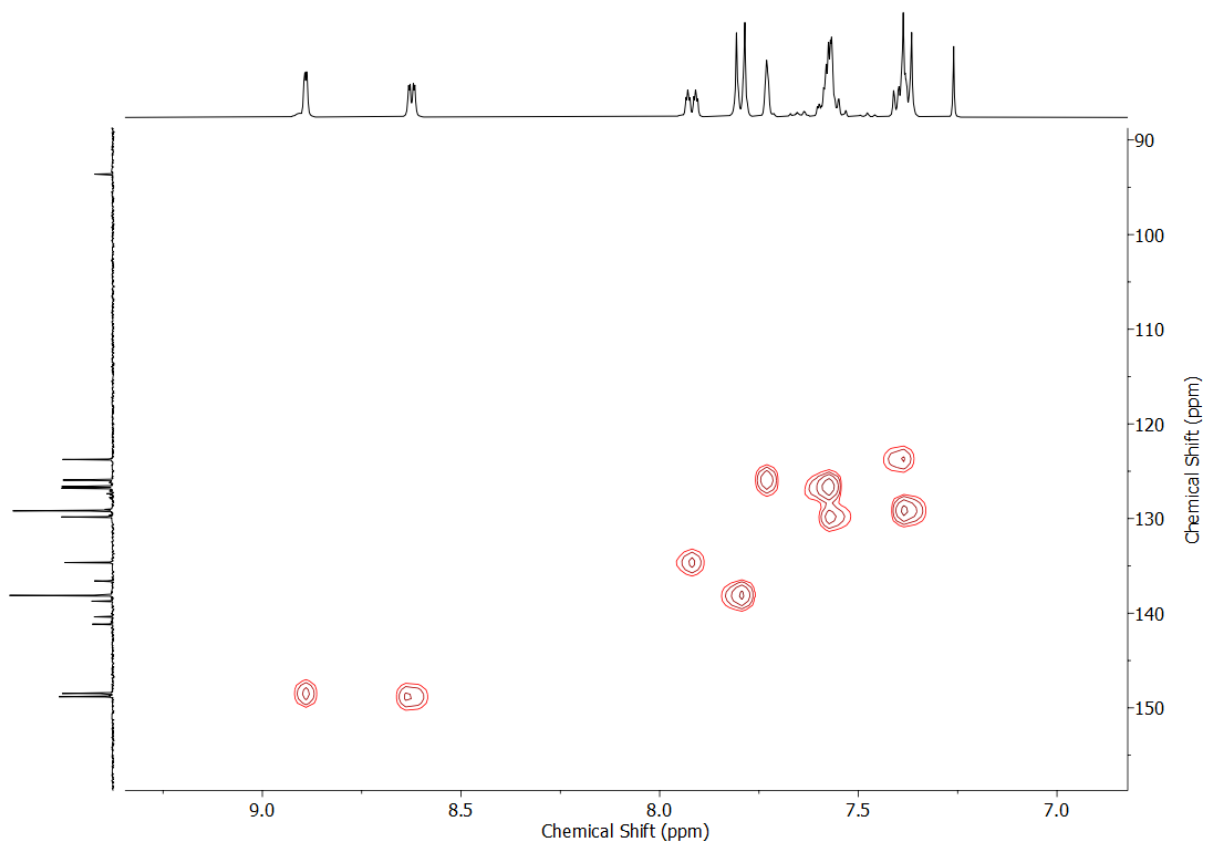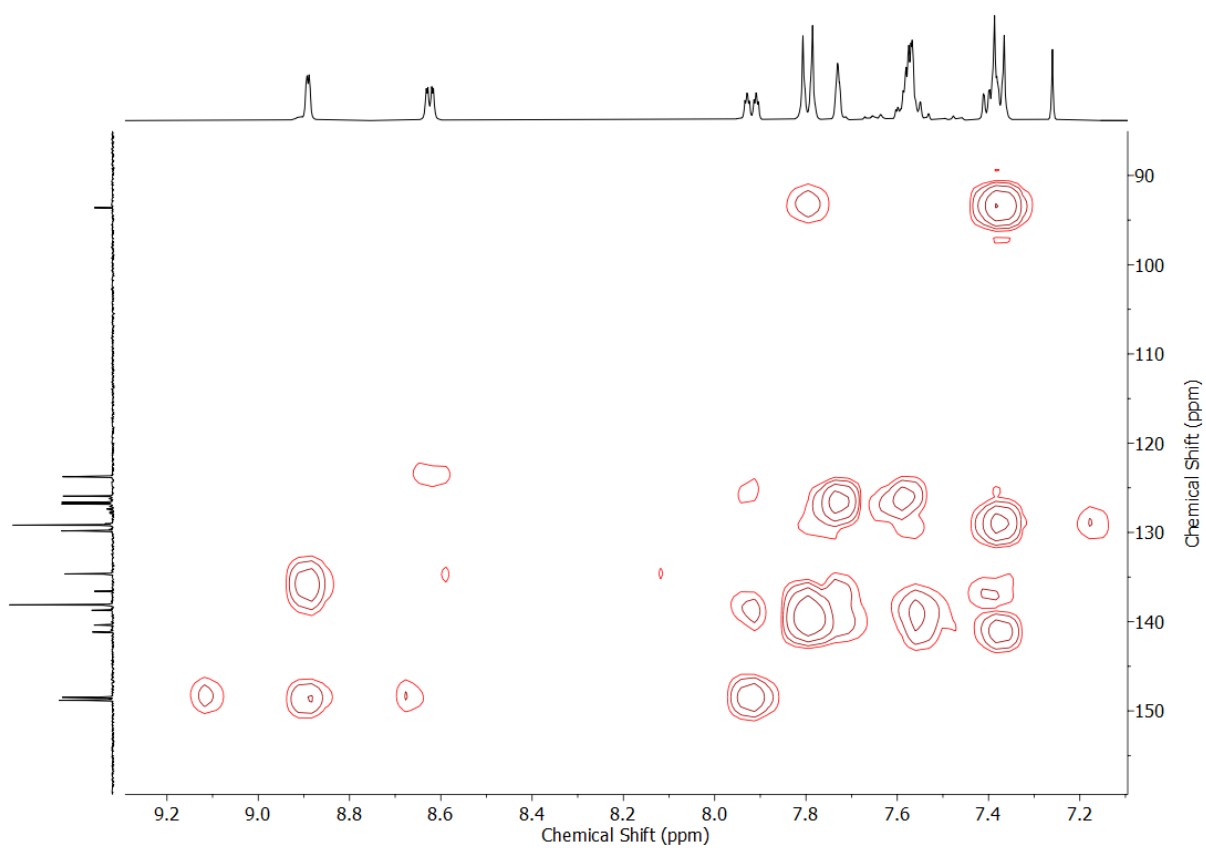

## Synthesis of L1<sup>Ph</sup>

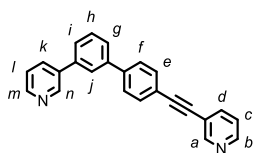

**S7** (0.107 g, 0.3 mmol, 1 eq.), 3-ethynylpyridine (0.034 g, 0.33 mmol, 1.1 eq.), Pd(PPh<sub>3</sub>)<sub>2</sub>Cl<sub>2</sub> (0.011 g, 0.015 mmol, 5 mol%) and CuI (0.0029 g, 0.015 mmol, 5 mol%) were stirred at rt in 1:1 <sup>i</sup>Pr<sub>2</sub>NH/dioxane (3 mL) for 20 h. EDTA solution (20 mL) was added and the aqueous phase extracted with CH<sub>2</sub>Cl<sub>2</sub> (3 × 20 mL). The combined organic phases were dried (MgSO<sub>4</sub>) and the solvent removed *in vacuo*. After purification by column chromatography on silica (pentane with step gradient 0 to 70% EtOAc in 10% increments) the product was obtained as an orange solid (0.090 g, 90%).

**<sup>1</sup>H NMR** (400 MHz, CDCl<sub>3</sub>) δ: 8.91 (d, *J* = 1.7 Hz, 1H, H<sub>n</sub>), 8.79 (dd, *J* = 2.2, 0.9 Hz, 1H, H<sub>a</sub>), 8.63 (dd, *J* = 4.8, 1.5 Hz, 1H, H<sub>m</sub>), 8.56 (dd, *J* = 4.9, 1.6 Hz, 1H, H<sub>b</sub>), 7.94 (dt, *J* = 7.9, 1.9 Hz, 1H, H<sub>k</sub>), 7.83 (dt, *J* = 7.9, 1.9 Hz, 1H, H<sub>d</sub>), 7.80 (s, 1H, 1 of H<sub>j</sub>), 7.66-7.64 (m, 5H, H<sub>e</sub>, H<sub>f</sub>, 1 of H<sub>g</sub>/H<sub>h</sub>/H<sub>i</sub>), 7.59-7.57 (m, 2H, 2 of H<sub>g</sub>/H<sub>h</sub>/H<sub>i</sub>), 7.40 (dd, *J* = 7.9, 4.8, 0.9 Hz, 1H, H<sub>l</sub>), 7.30 (ddd, *J* = 7.9, 4.9, 0.9 Hz, 1H, H<sub>c</sub>).

**<sup>13</sup>C NMR** (101 MHz, CDCl<sub>3</sub>) δ: 152.4 (C<sub>a</sub>), 148.9 (C<sub>m</sub>), 148.8 (C<sub>b</sub>), 148.5 (C<sub>n</sub>), 141.3, 141.2, 138.7, 138.6 (C<sub>d</sub>), 136.6, 134.6 (C<sub>k</sub>), 132.4 (C<sub>e</sub>/C<sub>f</sub>), 129.8 (C<sub>g</sub>/C<sub>h</sub>/C<sub>i</sub>), 127.4 (C<sub>e</sub>/C<sub>f</sub>), 126.9 (C<sub>g</sub>/C<sub>h</sub>/C<sub>i</sub>), 126.7 (C<sub>g</sub>/C<sub>h</sub>/C<sub>i</sub>), 126.1 (C<sub>j</sub>), 123.8 (C<sub>l</sub>), 123.2 (C<sub>c</sub>), 121.9, 120.6, 92.6, 87.0.

**HR-ESI-MS** *m/z* = 333.1396 [M+H]<sup>+</sup> calc. 333.1392.

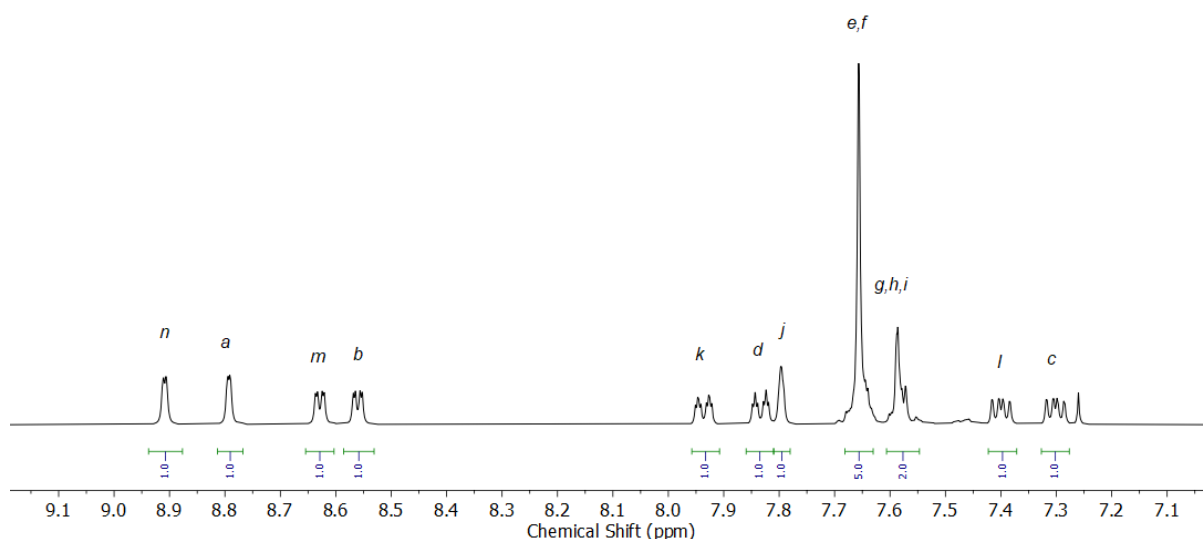

Figure S63 <sup>1</sup>H NMR (400 MHz, CDCl<sub>3</sub>) of L1<sup>Ph</sup>.

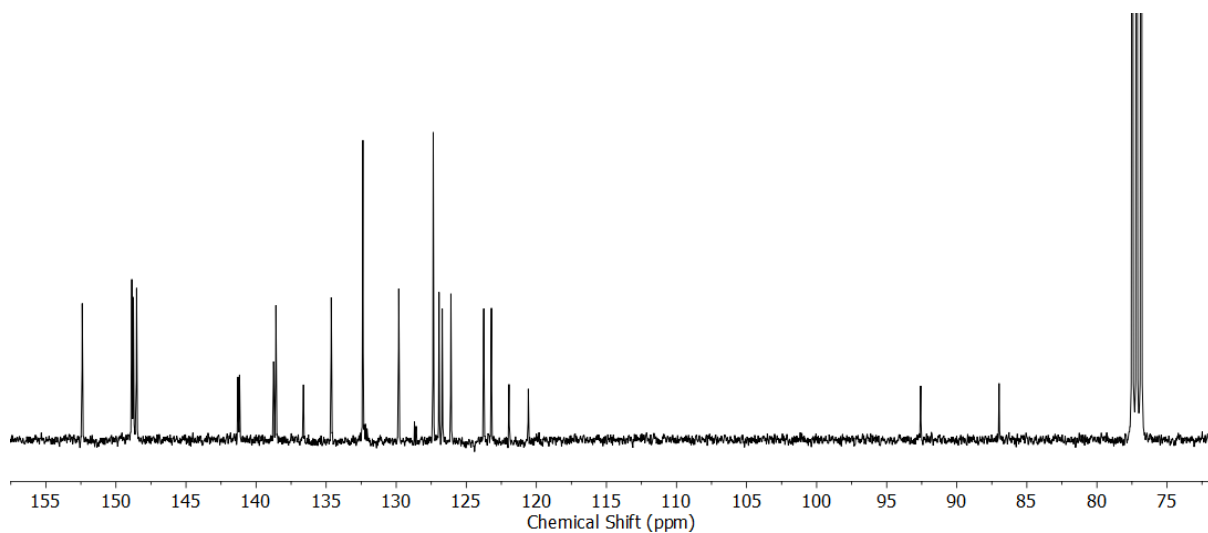

Figure S64  $^{13}\text{C}$  NMR (101 MHz,  $\text{CDCl}_3$ ) of **L1<sup>Ph</sup>**.

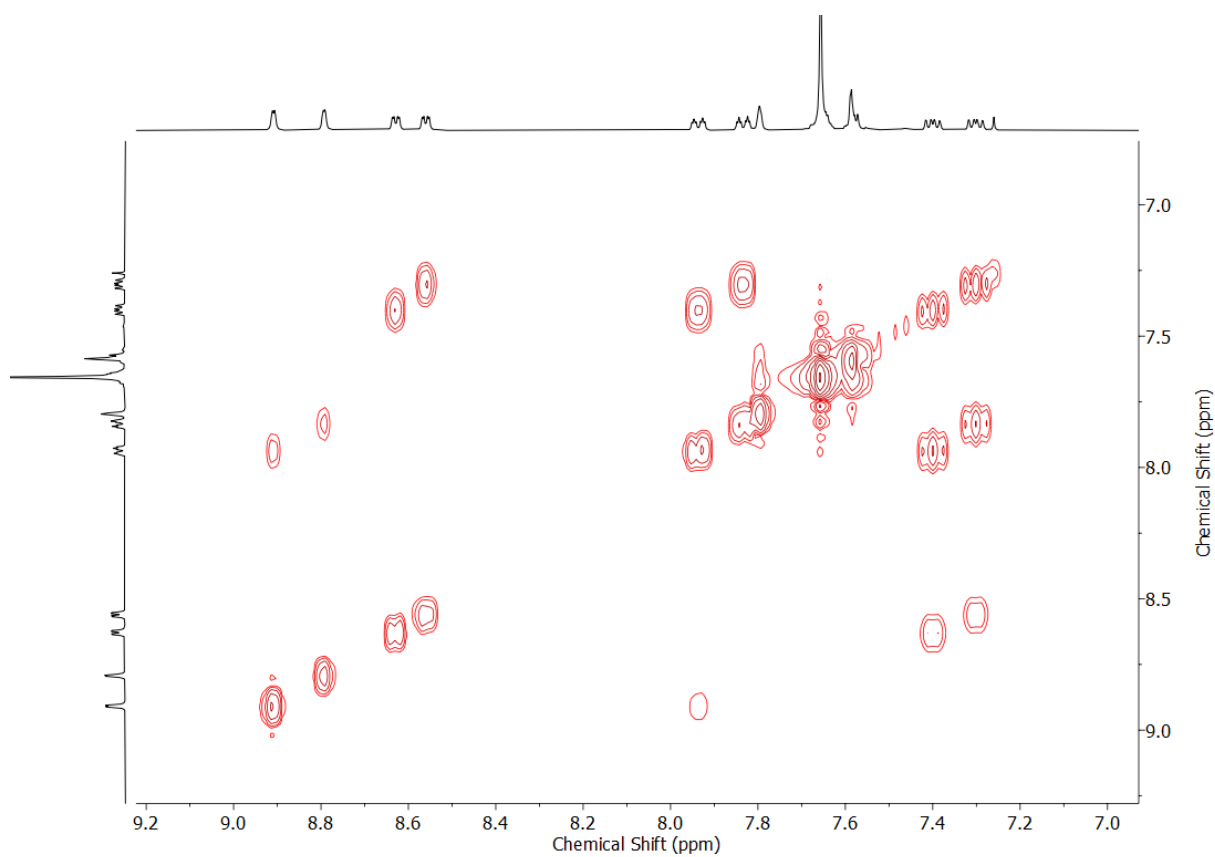

Figure S65 COSY NMR ( $\text{CDCl}_3$ ) of **L1<sup>Ph</sup>**.



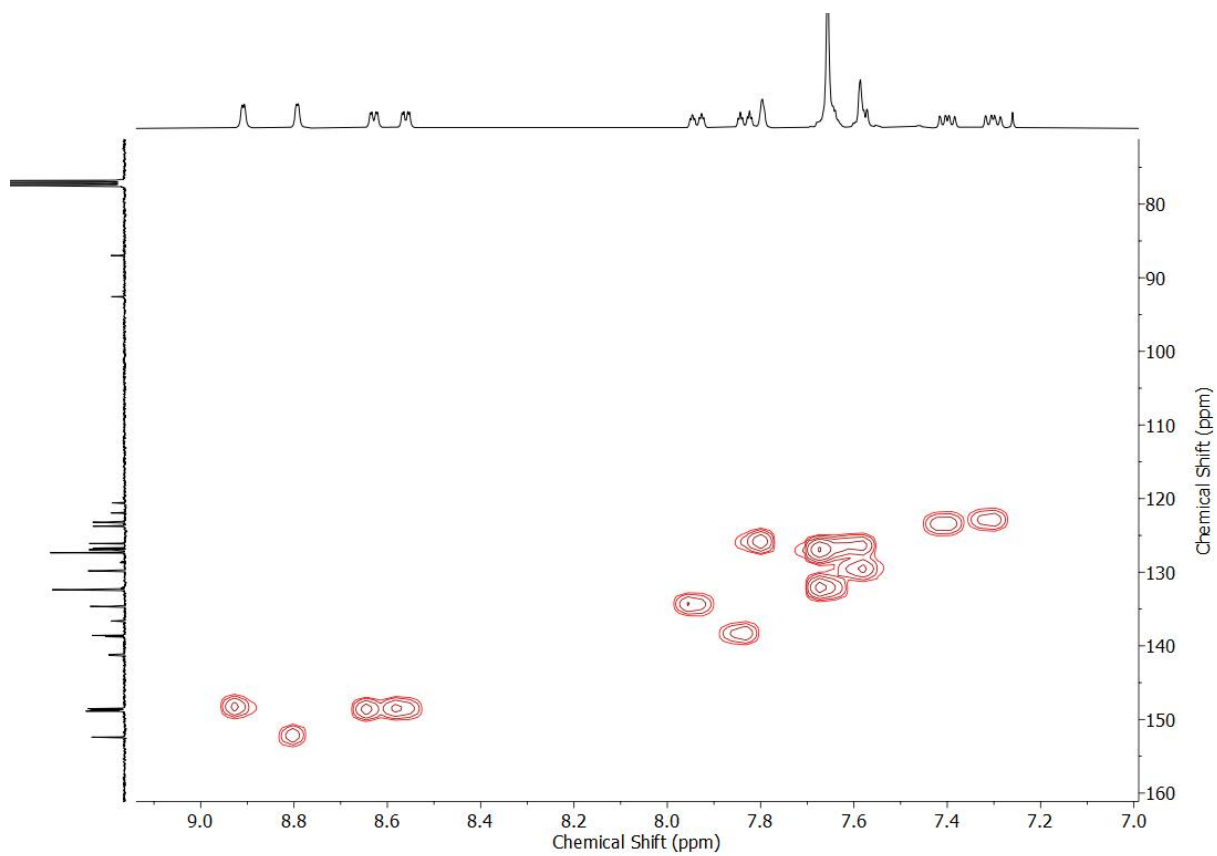

Figure S66 HSQC NMR (CDCl<sub>3</sub>) of L1<sup>Ph</sup>.

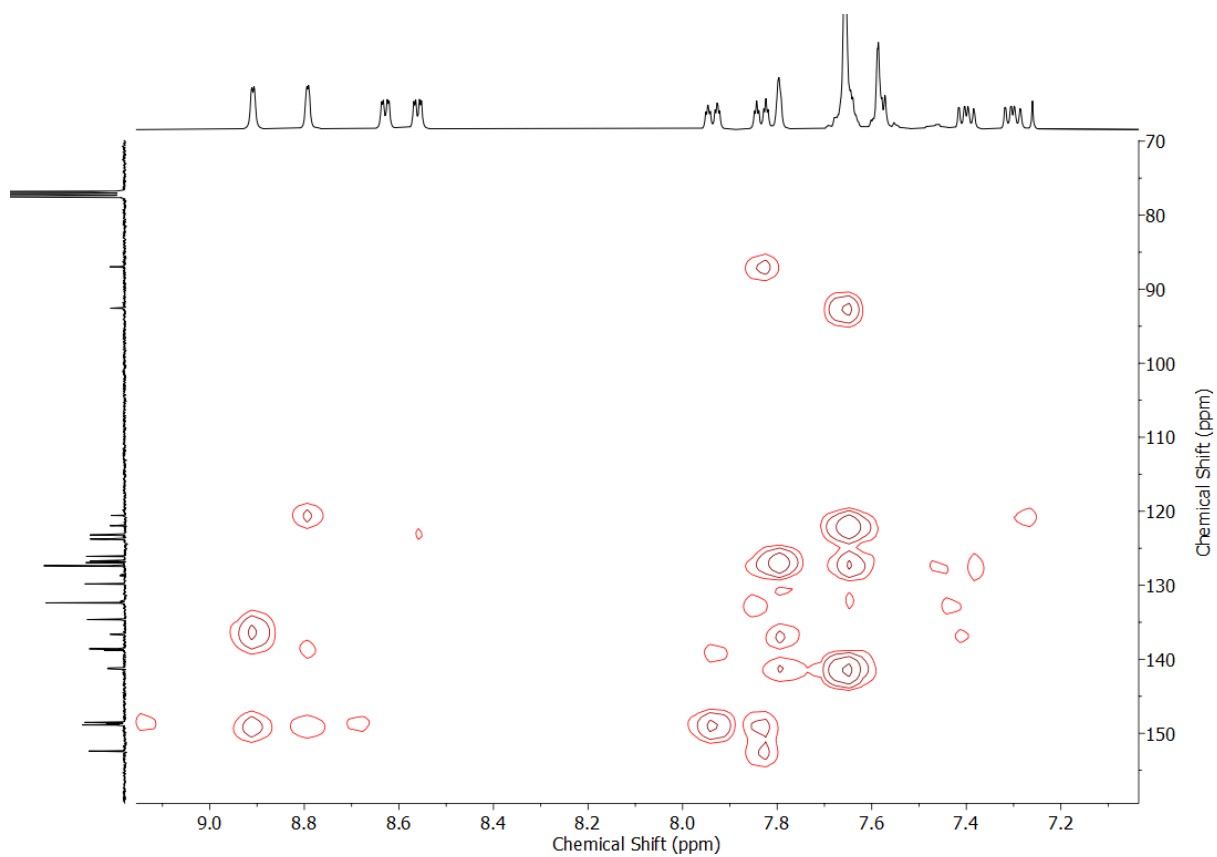

Figure S67 HMBC NMR (CDCl<sub>3</sub>) of L1<sup>Ph</sup>.

## Synthesis of *cis*-[Pd<sub>2</sub>(L1<sup>Ph</sup>)<sub>4</sub>](BF<sub>4</sub>)<sub>4</sub> (C1<sup>Ph</sup>)

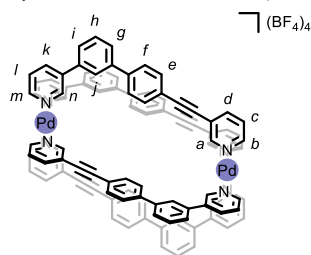

**L1<sup>Ph</sup>** (10.0 mg, 30 μmol, 2 eq.) and [Pd(CH<sub>3</sub>CN)<sub>4</sub>](BF<sub>4</sub>)<sub>2</sub> (6.7 mg, 15 μmol, 1 eq.) were sonicated in *d*<sub>6</sub>-DMSO (0.75 mL) until a homogenous solution was obtained. After standing at rt for 1 d, <sup>1</sup>H NMR demonstrated quantitative conversion to **C1<sup>Ph</sup>**. The solution was diluted with MeCN (0.75 mL), filtered through celite, and left for vapour diffusion of Et<sub>2</sub>O. After 7 d the mother liquor was carefully decanted and the precipitate washed with Et<sub>2</sub>O and dried *in vacuo* to give the product as a yellow solid (12.1 mg, 85%).

**<sup>1</sup>H NMR** (400 MHz, *d*<sub>6</sub>-DMSO) δ: 9.83 (s, 4H, H<sub>a</sub>), 9.47 (s, 4H, H<sub>n</sub>), 9.41 (d, *J* = 5.5 Hz, 4H, H<sub>m</sub>), 9.32 (d, *J* = 5.4 Hz, 4H, H<sub>b</sub>), 8.55 (d, *J* = 8.2 Hz, 4H, H<sub>k</sub>), 8.31 (s, 4H, H<sub>j</sub>), 8.23 (d, *J* = 8.0 Hz, 4H, H<sub>d</sub>), 8.05 (d, *J* = 7.9 Hz, 8H, H<sub>f</sub>), 7.92 (dd, *J* = 8.0, 5.8 Hz, 4H, H<sub>l</sub>), 7.83-7.76 (m, 20H, H<sub>c</sub>, H<sub>e</sub>, H<sub>g</sub>, H<sub>i</sub>), 7.61 (app. t, *J* = 7.7 Hz, 4H, H<sub>h</sub>).

**Diffusion coefficient** (400 MHz, *d*<sub>6</sub>-DMSO) *D*: 9.99 × 10<sup>-11</sup> m<sup>2</sup>s<sup>-1</sup>; *R<sub>H</sub>*: 10.0 Å.

**<sup>13</sup>C NMR** (101 MHz, *d*<sub>6</sub>-DMSO) δ: 153.2 (C<sub>a</sub>), 150.3 (C<sub>b</sub>), 149.8 (C<sub>m</sub>), 148.4 (C<sub>n</sub>), 142.1 (C<sub>d</sub>), 140.7, 139.9, 138.8 (C<sub>k</sub>), 137.9, 134.5, 132.2 (C<sub>e</sub>), 130.4 (C<sub>h</sub>), 128.1 (C<sub>c</sub>/C<sub>g</sub>/C<sub>i</sub>/C<sub>l</sub>), 127.7 (C<sub>f</sub>), 127.5 (C<sub>c</sub>/C<sub>g</sub>/C<sub>i</sub>/C<sub>l</sub>), 127.2 (C<sub>c</sub>/C<sub>g</sub>/C<sub>i</sub>/C<sub>l</sub>), 127.1 (C<sub>c</sub>/C<sub>g</sub>/C<sub>i</sub>/C<sub>l</sub>), 124.4 (C<sub>j</sub>), 122.6, 120.3, 94.6, 84.8.

**ESI-MS** *m/z* = 857.09 {[Pd<sub>2</sub>(L1<sup>Ph</sup>)<sub>4</sub>](BF<sub>4</sub>)<sub>2</sub>}<sup>2+</sup> calc. 857.17; 1762.16 {[Pd<sub>2</sub>(L1<sup>Ph</sup>)<sub>4</sub>](BF<sub>4</sub>)<sub>2</sub>(HCO<sub>2</sub>)}<sup>+</sup> calc. 1762.34.

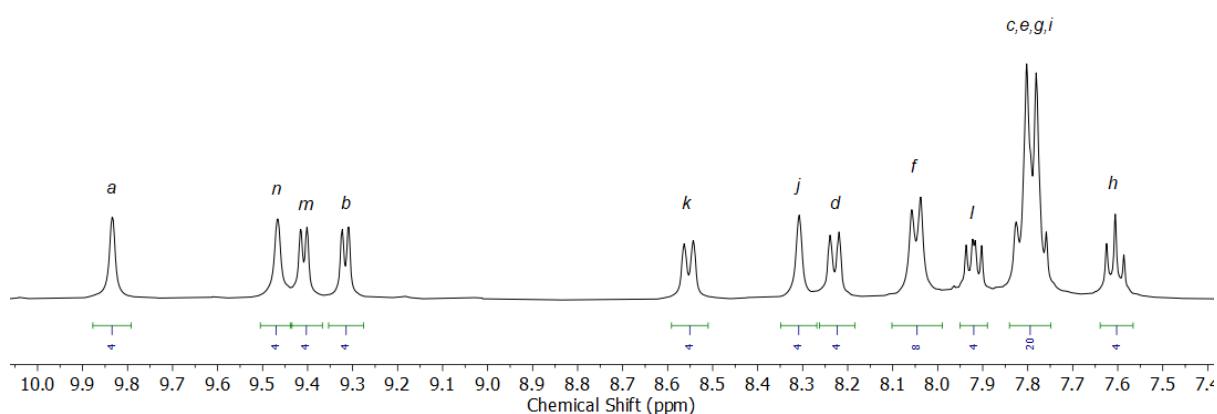

Figure S68 <sup>1</sup>H NMR (400 MHz, *d*<sub>6</sub>-DMSO) of [Pd<sub>2</sub>(L1<sup>Ph</sup>)<sub>2</sub>](BF<sub>4</sub>)<sub>4</sub>.

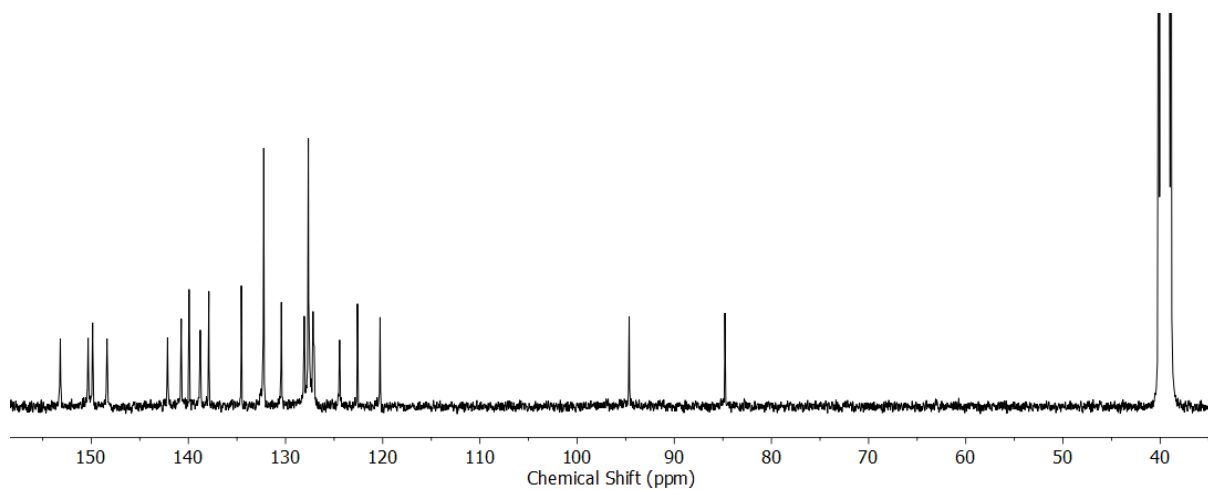

Figure S69  $^{13}\text{C}$  NMR (101 MHz,  $d_6$ -DMSO) of  $[\text{Pd}_2(\text{L1}^{\text{Ph}})_2](\text{BF}_4)_4$ .

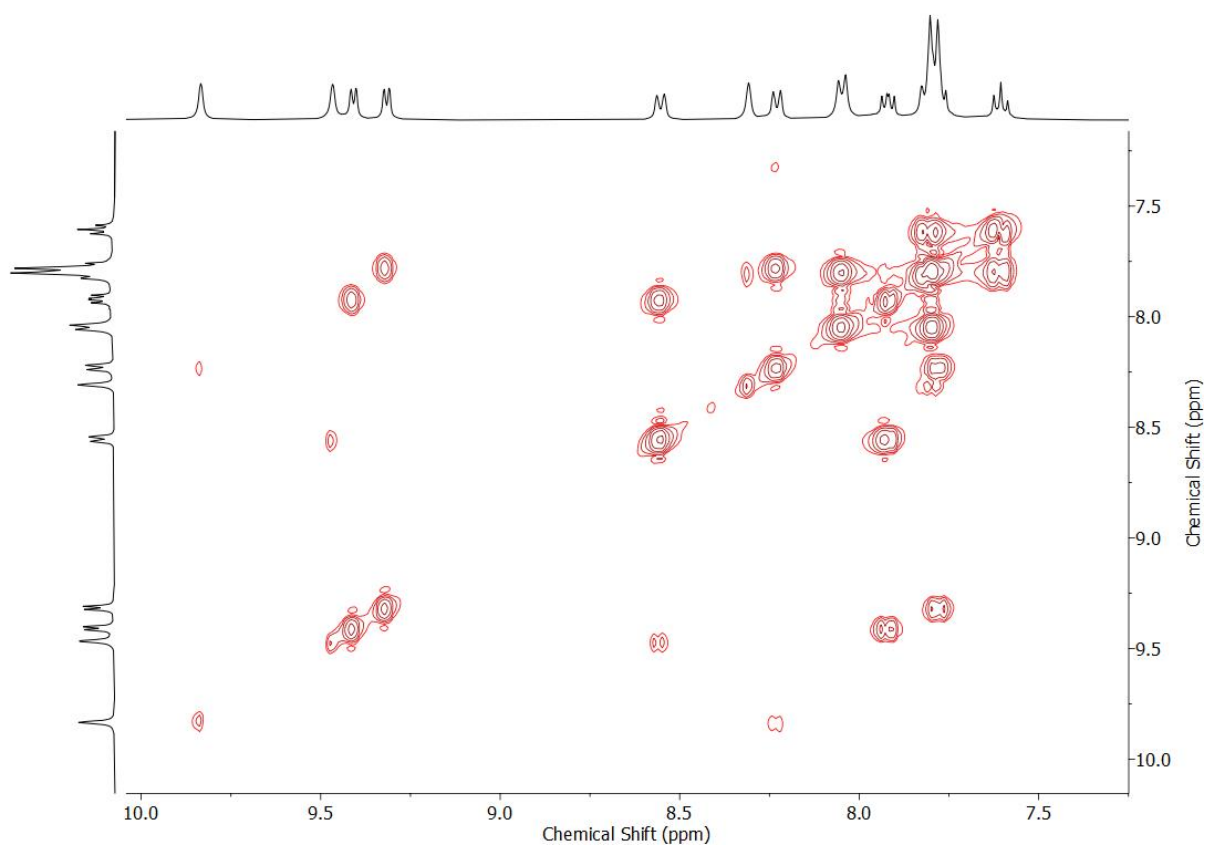

Figure S70 COSY NMR ( $d_6$ -DMSO) of  $[\text{Pd}_2(\text{L1}^{\text{Ph}})_2](\text{BF}_4)_4$ .

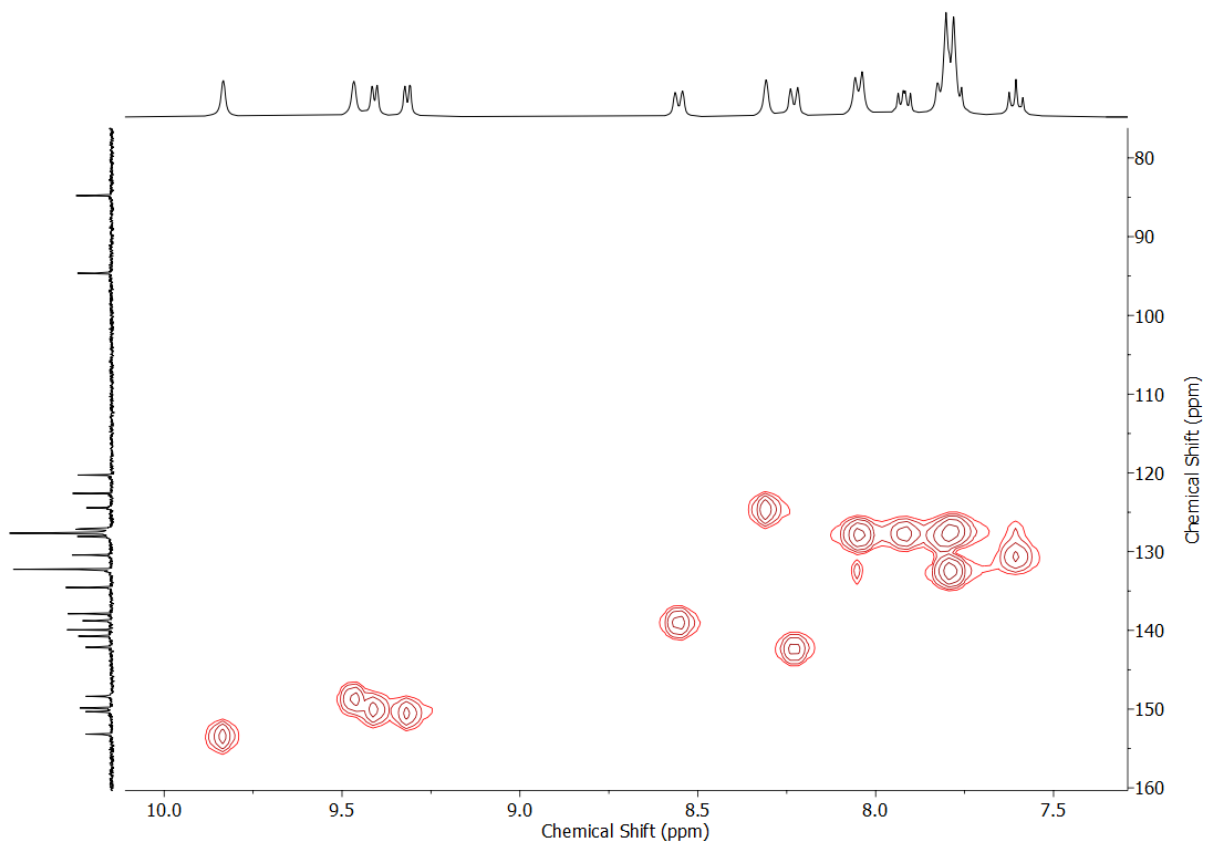

Figure S71 HSQC NMR ( $d_6$ -DMSO) of  $[\text{Pd}_2(\text{L1}^{\text{Ph}})_2](\text{BF}_4)_4$ .

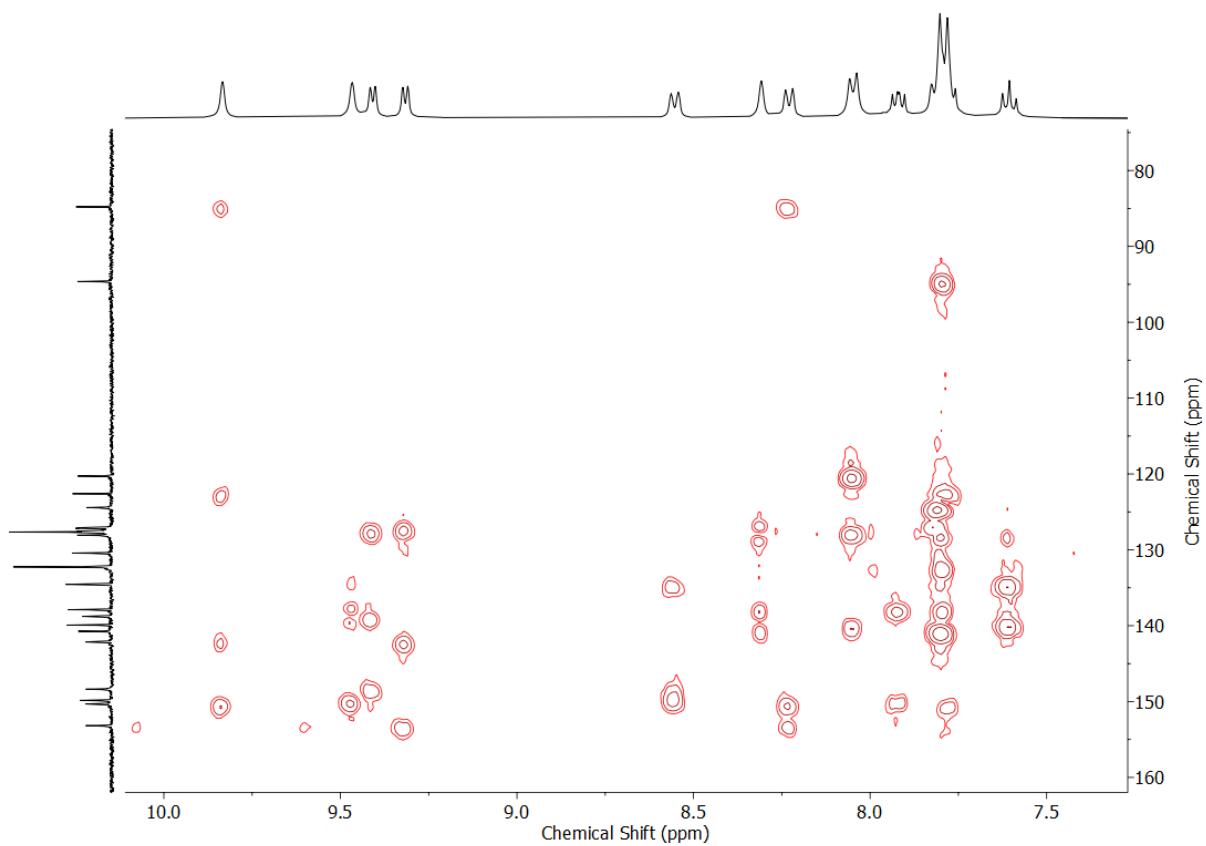

Figure S72 HMBC NMR ( $d_6$ -DMSO) of  $[\text{Pd}_2(\text{L1}^{\text{Ph}})_2](\text{BF}_4)_4$ .

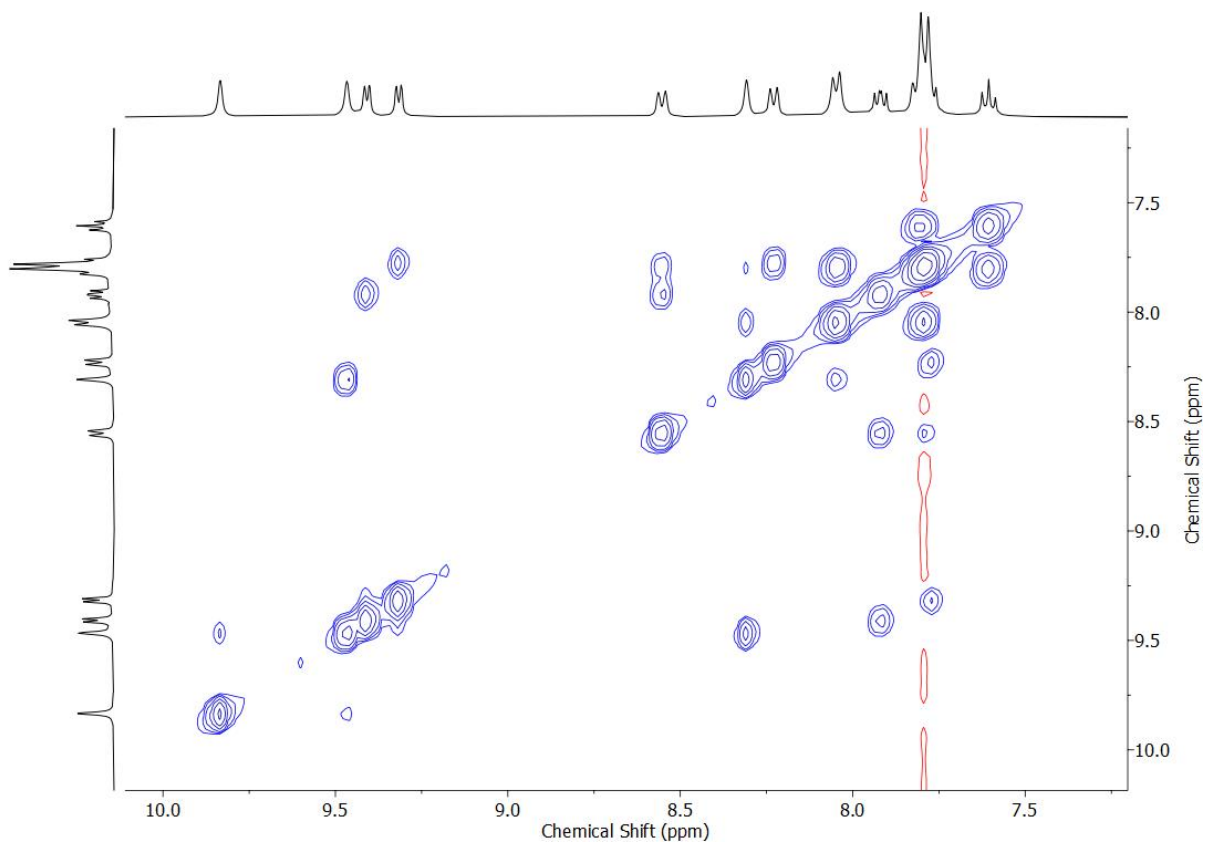

Figure S73 NOESY ( $d_6$ -DMSO) of  $[\text{Pd}_2(\text{L1}^{\text{Ph}})_2](\text{BF}_4)_4$ .

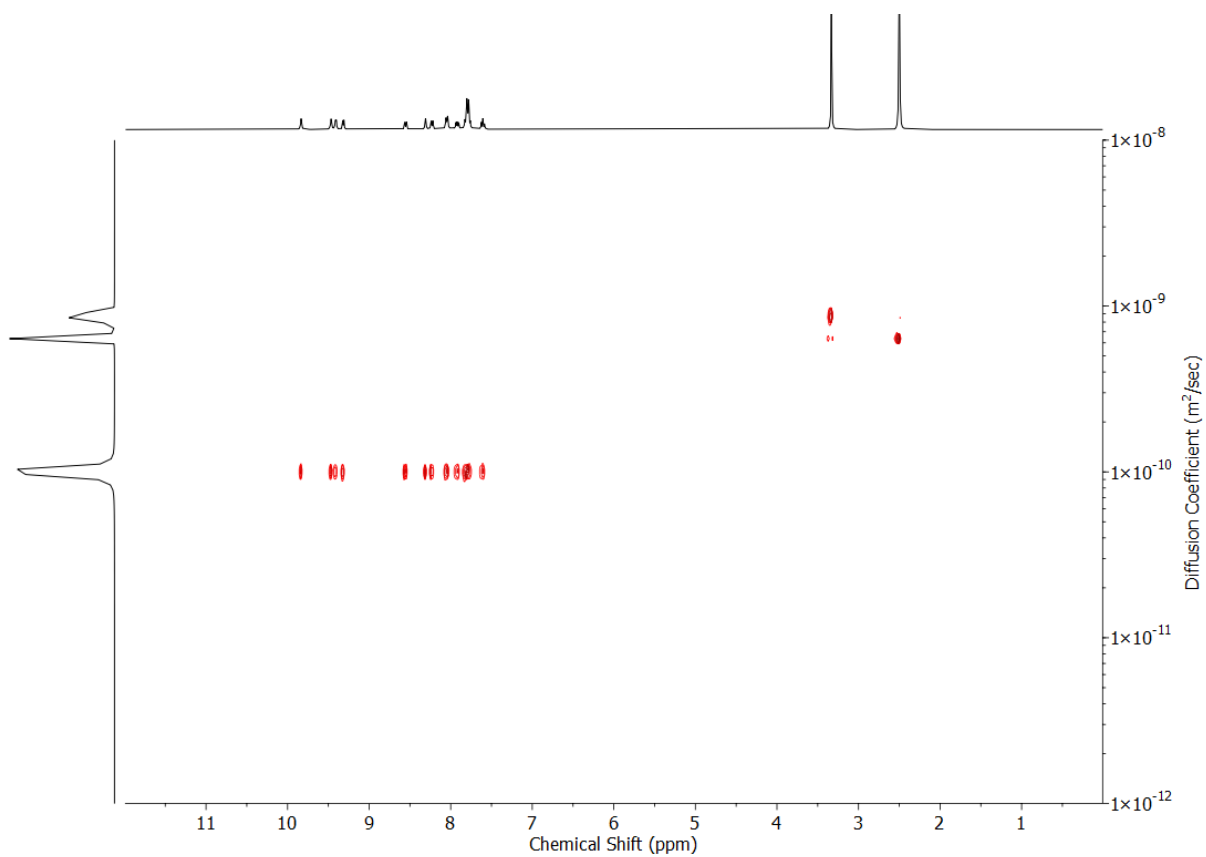

Figure S74 DOSY ( $d_6$ -DMSO) of  $[\text{Pd}_2(\text{L1}^{\text{Ph}})_2](\text{BF}_4)_4$ .

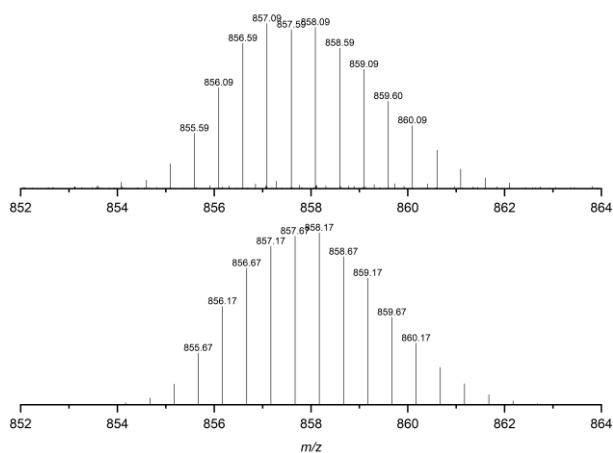

Figure S75 Observed (top) and calculated (bottom) isotopic patterns for  $\{[Pd_2(L1Ph)_4](BF_4)_2\}^{2+}$ .

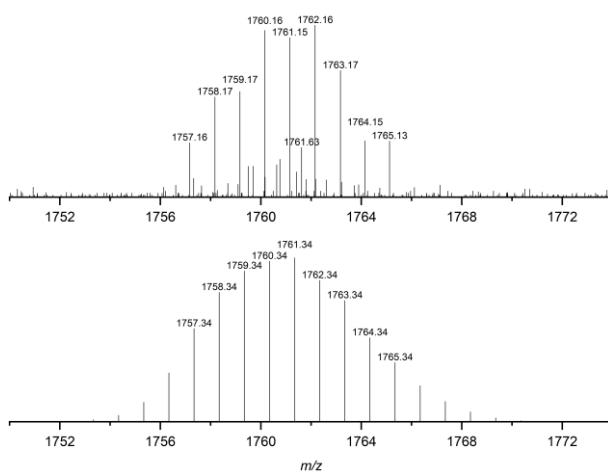

Figure S76 Observed (top) and calculated (bottom) isotopic patterns for  $\{[Pd_2(L1Ph)_4](BF_4)_2(HCO_2)\}^+$ .

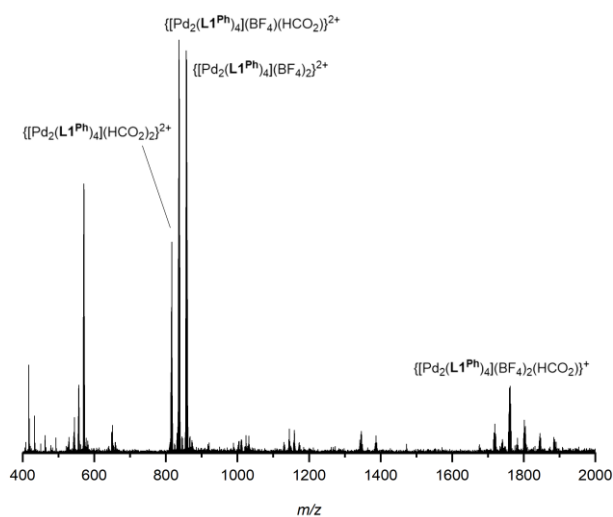

Figure S77 ESI-MS of  $[Pd_2(L1Ph)_2](BF_4)_4$ .

## Synthesis of S8

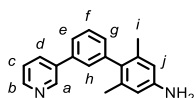

(3-(Pyridin-3-yl)phenyl)boronic acid (0.398 g, 2 mmol, 1 eq.), 4-bromo-3,5-dimethylaniline (0.440 g, 2.2 mmol, 1.1 eq.), Pd(PPh<sub>3</sub>)<sub>2</sub>Cl<sub>2</sub> (0.035 g, 0.05 mmol, 2.5 mol%) and K<sub>2</sub>CO<sub>3</sub> (0.691 g, 5 mmol, 2.5 eq.) were stirred at 100 °C in 2:1 dioxane/H<sub>2</sub>O (6 mL) in a sealed vial for 18 h. H<sub>2</sub>O (20 mL) was added and the aqueous phase extracted with CH<sub>2</sub>Cl<sub>2</sub> (3 × 25 mL). The combined organic phases were dried (MgSO<sub>4</sub>) and the solvent removed *in vacuo*. After purification by column chromatography on silica gel (CH<sub>2</sub>Cl<sub>2</sub> with step gradient 0 to 20% acetone in 5% increments) the product was obtained as an orange oil that solidified on standing (0.531 g, 97%).

<sup>1</sup>H NMR (400 MHz, *d*<sub>6</sub>-DMSO) δ: 8.91 (s, 1H, H<sub>a</sub>), 8.56 (d, *J* = 4.6 Hz, 1H, H<sub>b</sub>), 8.10 (d, *J* = 7.9 Hz, 1H, H<sub>d</sub>), 7.65 (d, *J* = 7.7 Hz, 1H, H<sub>e</sub>), 7.52 (app. t, *J* = 7.7 Hz, 1H, H<sub>f</sub>), 7.46 (dd, *J* = 7.7, 4.9 Hz, 1H, H<sub>c</sub>), 7.42 (s, 1H, H<sub>h</sub>), 7.14 (d, *J* = 7.5 Hz, 1H, H<sub>g</sub>), 6.34 (s, 2H, H<sub>j</sub>), 4.93 (s, 2H, H<sub>NH</sub>), 1.89 (s, 6H, H<sub>i</sub>).

<sup>13</sup>C NMR (101 MHz, *d*<sub>6</sub>-DMSO) δ: 148.4 (C<sub>b</sub>), 147.7 (C<sub>a</sub>), 147.4, 142.1, 137.0, 135.6, 135.5, 134.2 (C<sub>d</sub>), 129.8 (C<sub>g</sub>), 129.1 (C<sub>f</sub>), 128.3 (C<sub>h</sub>), 124.7 (C<sub>e</sub>), 123.9 (C<sub>c</sub>), 113.0 (C<sub>j</sub>), 20.8 (C<sub>i</sub>) (1 signal missing).

HR-ESI-MS *m/z* = 275.1544 [M+H]<sup>+</sup> calc. 275.1548.

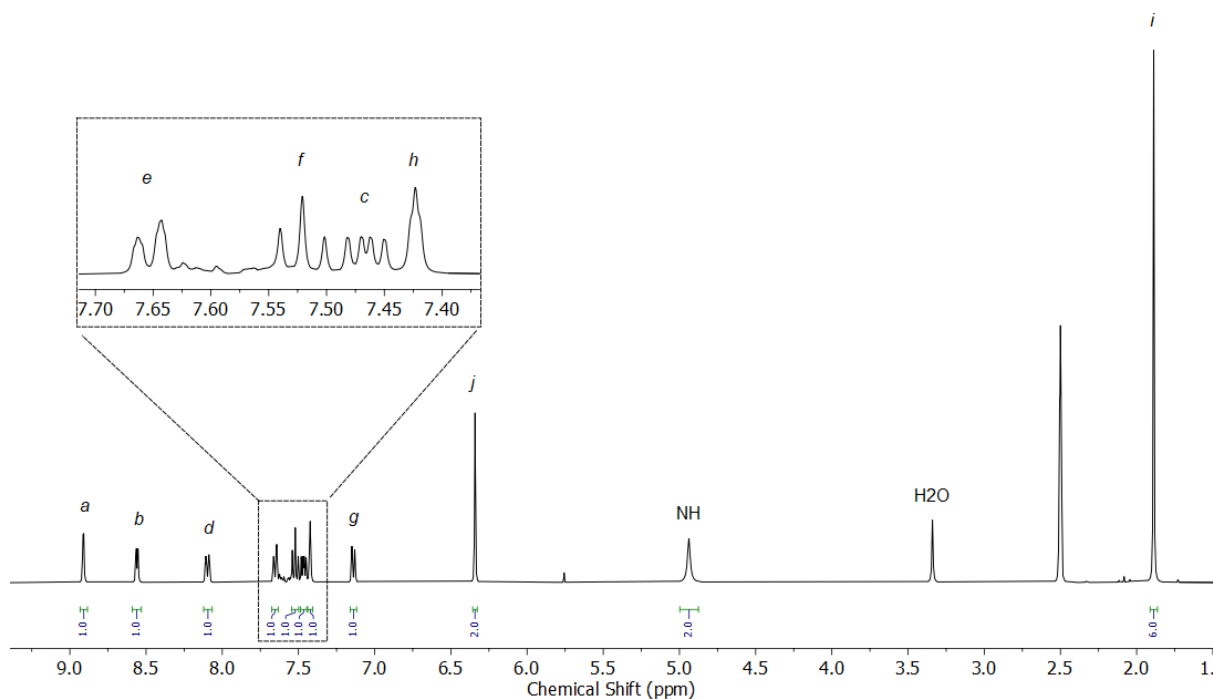

Figure S78 <sup>1</sup>H NMR (400 MHz, *d*<sub>6</sub>-DMSO) of S8.

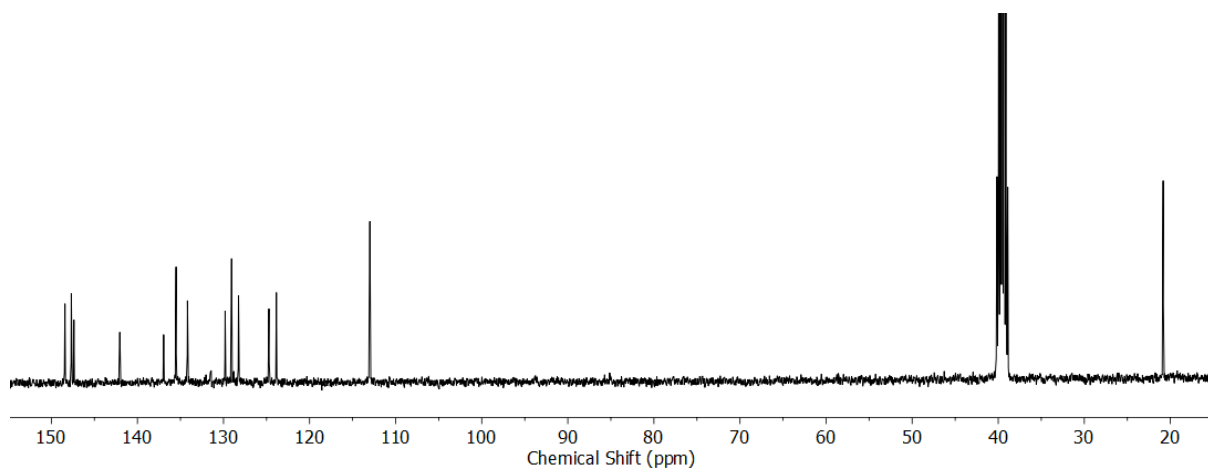

Figure S79 <sup>13</sup>C NMR (101 MHz, *d*<sub>6</sub>-DMSO) of **S8**.

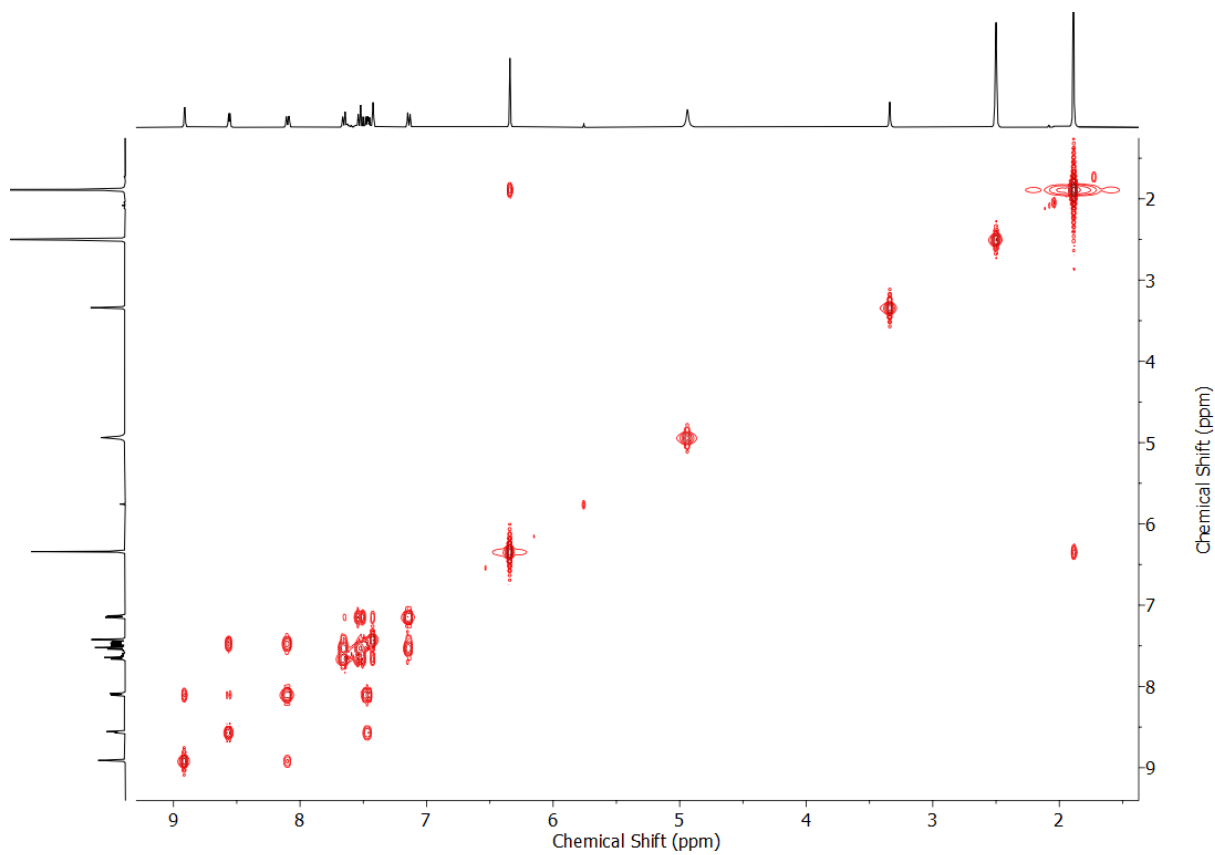

Figure S80 COSY NMR (*d*<sub>6</sub>-DMSO) of **S8**.



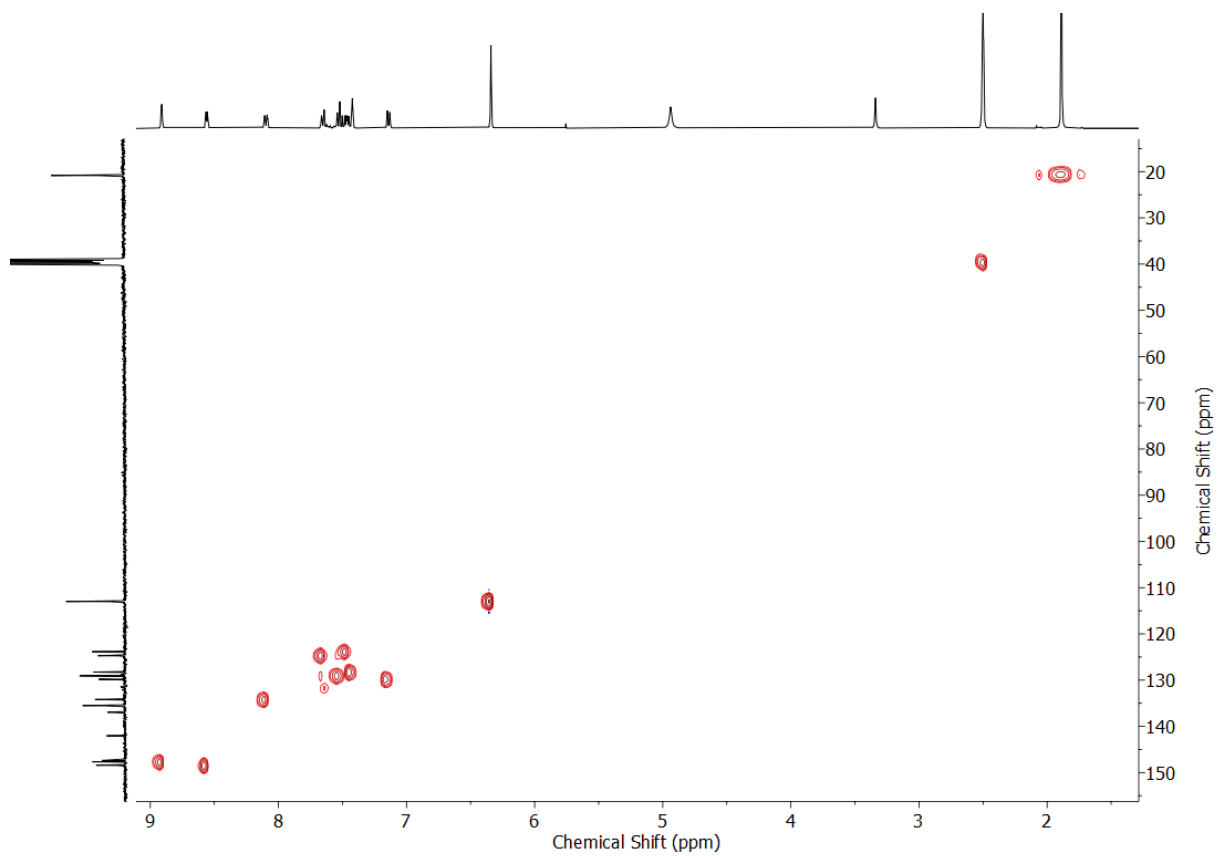

Figure S81 HSQC NMR ( $d_6$ -DMSO) of **S8**.

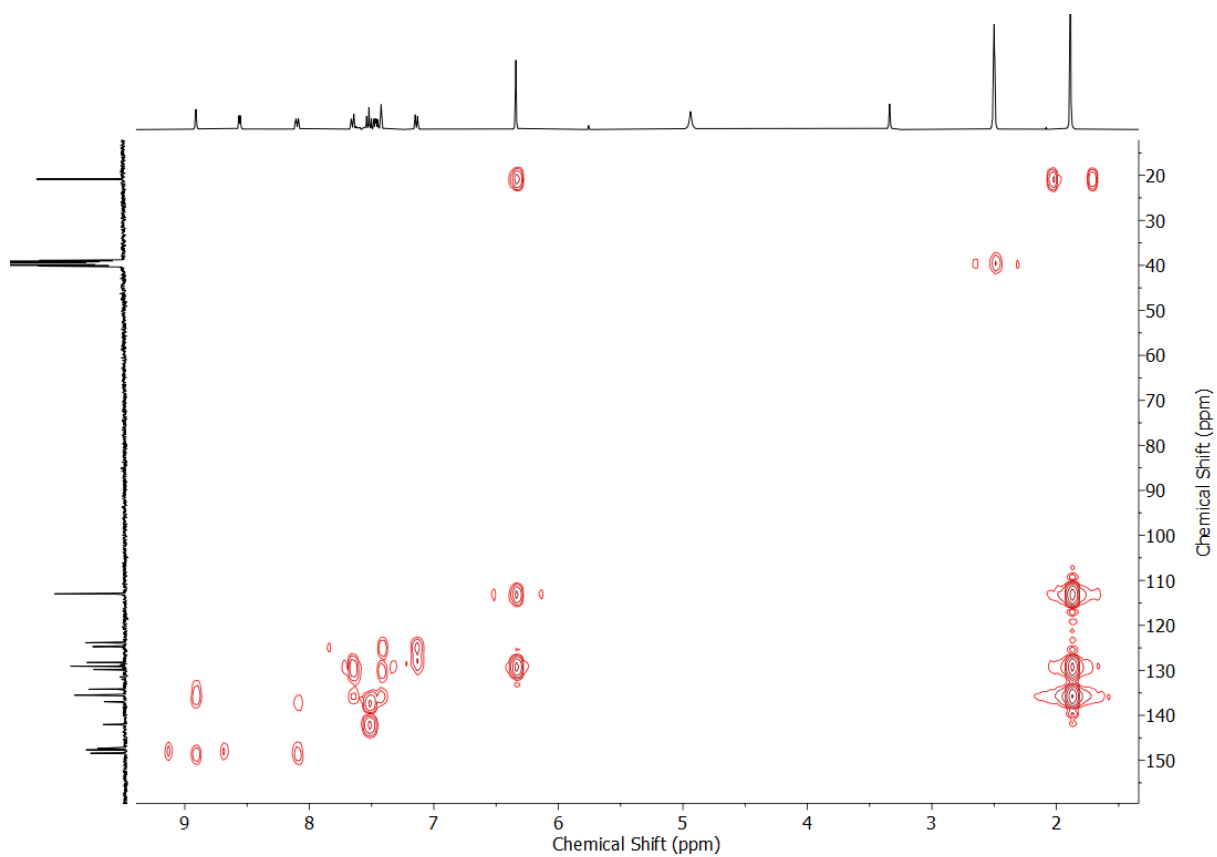

Figure S82 HMBC NMR ( $d_6$ -DMSO) of **S8**.

## Synthesis of S9

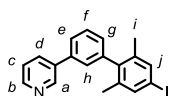

To a vigorously stirring solution of **S8** (0.412 g, 1.5 mmol, 1 eq.) in CH<sub>3</sub>CN (9 mL) at 0 °C under air was added TsOH·H<sub>2</sub>O (0.856 g, 4.5 mmol, 3 eq.) portionwise. A solution of NaNO<sub>2</sub> (0.207 g, 3 mmol, 2 eq.) and KI (0.623 g, 2.75 mmol, 2.5 eq.) in H<sub>2</sub>O (1 mL) was added dropwise and the reaction mixture stirred, allowing to warm to rt, for 15 h. H<sub>2</sub>O (20 mL), sat. aq. NaHCO<sub>3</sub> (20 mL) and 0.5 M Na<sub>2</sub>S<sub>2</sub>O<sub>3(aq)</sub> were added sequentially. The aqueous phase was extracted with EtOAc (3 × 25 mL) and the combined organic phases dried (MgSO<sub>4</sub>) and the solvent removed *in vacuo*. After purification by column chromatography on silica gel (1:9 acetone/CH<sub>2</sub>Cl<sub>2</sub>) the product was obtained as an orange oil (0.427 g, 74%).

**<sup>1</sup>H NMR** (400 MHz, CDCl<sub>3</sub>) δ: 8.87 (dd, *J* = 2.4, 0.9 Hz, 1H, H<sub>a</sub>), 8.60 (dd, *J* = 4.8, 1.6 Hz, 1H, H<sub>b</sub>), 7.89 (ddd, *J* = 7.9, 2.4, 1.6 Hz, 1H, H<sub>d</sub>), 7.60-7.52 (m, 2H, H<sub>e</sub>/H<sub>g</sub>, H<sub>f</sub>), 7.50 (s, 2H, H<sub>j</sub>), 7.38-7.34 (m, 2H, H<sub>c</sub>, H<sub>h</sub>) 7.16 (app. dt, *J* = 7.2, 1.6 Hz, 1H, H<sub>e</sub>/H<sub>g</sub>), 2.02 (s, 6H, H<sub>i</sub>).

**<sup>13</sup>C NMR** (101 MHz, CDCl<sub>3</sub>) δ: 148.8 (C<sub>b</sub>), 148.5 (C<sub>a</sub>), 141.1, 141.1, 138.5, 138.3, 136.5, 136.3 (C<sub>j</sub>), 134.5 (C<sub>d</sub>), 129.6 (C<sub>f</sub>), 128.8 (C<sub>e</sub>/C<sub>g</sub>), 127.6 (C<sub>h</sub>), 125.9 (C<sub>e</sub>/C<sub>g</sub>), 123.7 (C<sub>c</sub>), 93.1, 20.6 (C<sub>i</sub>).

**HR-ESI-MS** *m/z* = 386.0394 [M+H]<sup>+</sup> calc. 386.0406.

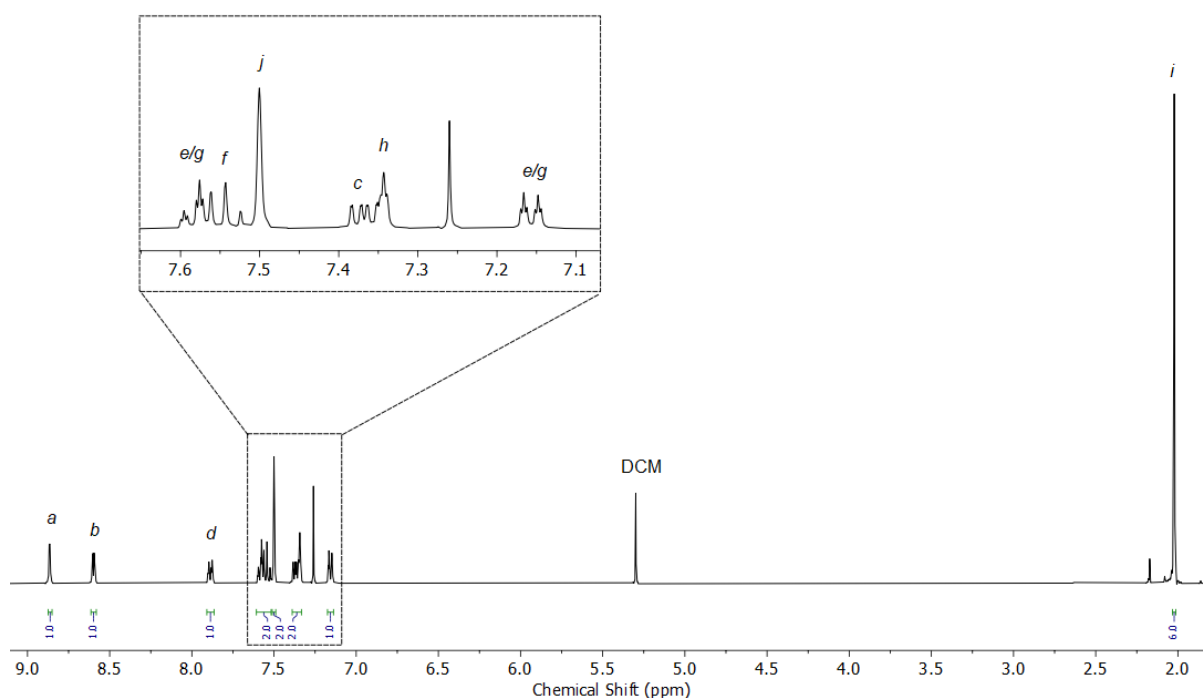

Figure S83 <sup>1</sup>H NMR (400 MHz, CDCl<sub>3</sub>) of **S9**.

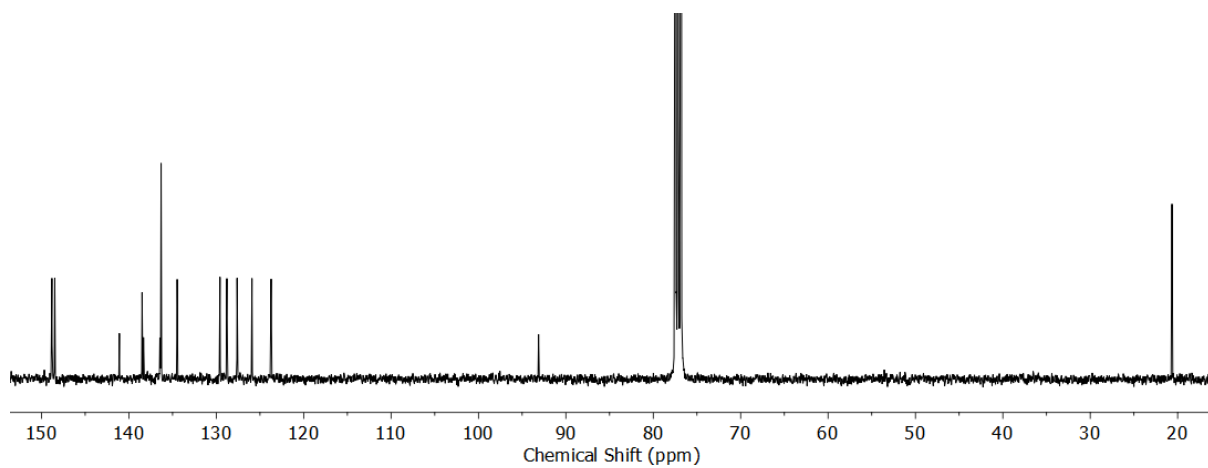

Figure S84  $^{13}\text{C}$  NMR (101 MHz,  $\text{CDCl}_3$ ) of **S9**.

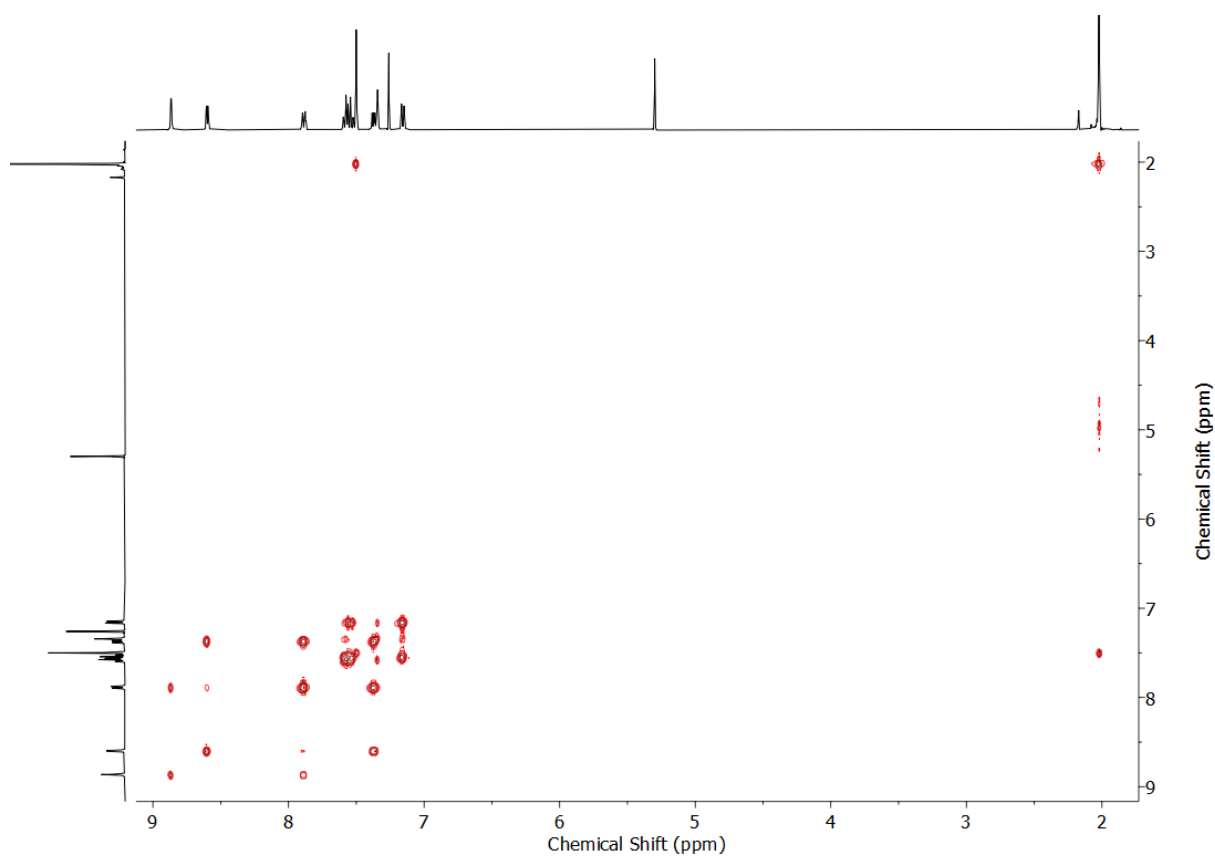

Figure S85 COSY NMR ( $\text{CDCl}_3$ ) of **S9**.

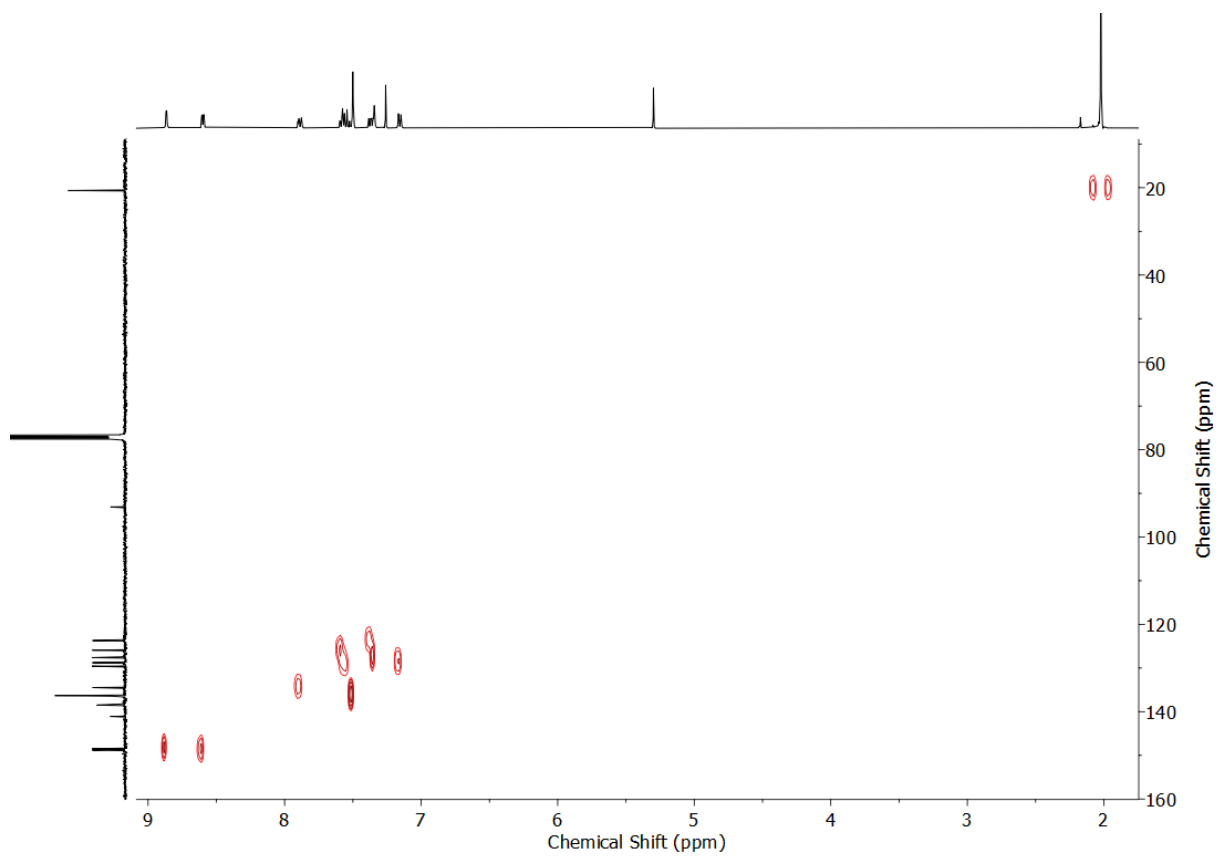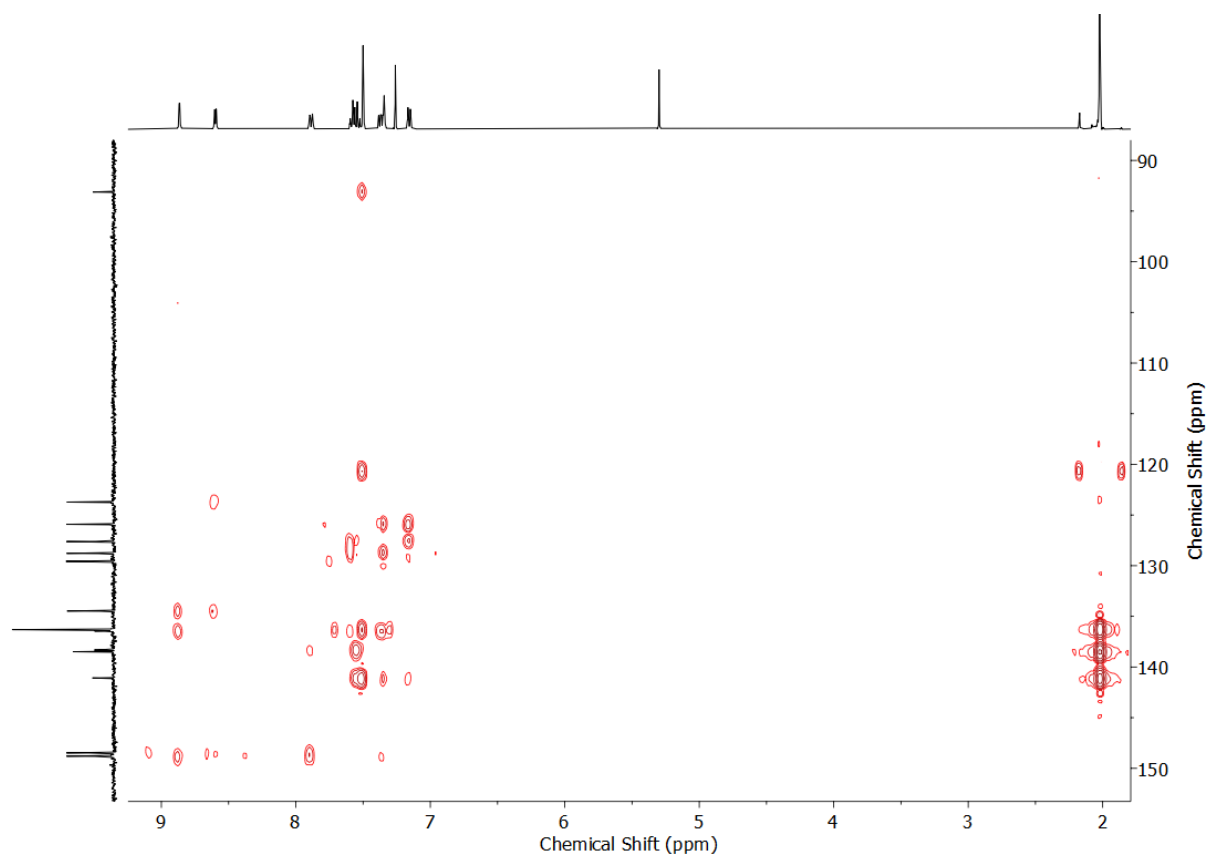

## Synthesis of L1<sup>XY</sup>

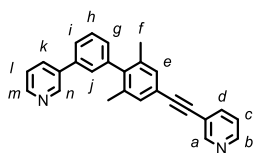

**S9** (0.193 g, 0.5 mmol, 1 eq.), 3-ethynylpyridine (0.057 g, 0.55 mmol, 1.1 eq.), Pd(PPh<sub>3</sub>)<sub>2</sub>Cl<sub>2</sub> (0.0088 g, 0.013 mmol, 2.5 mol%) and CuI (0.0048 g, 0.025 mmol, 5 mol%) were stirred at rt in <sup>i</sup>Pr<sub>2</sub>NH (5 mL) for 2 d. EDTA solution (20 mL) was added and the aqueous phase extracted with CH<sub>2</sub>Cl<sub>2</sub> (3 × 10 mL). The combined organic phases were dried (MgSO<sub>4</sub>) and the solvent removed *in vacuo*. Following purification by column chromatography (pentane with step gradient 0 to 45% EtOAc in 15% increments) the product was obtained as a thick, orange oil (0.178 g, 99%).

**<sup>1</sup>H NMR** (400 MHz, CDCl<sub>3</sub>) δ: 8.88 (dd, *J* = 2.4, 0.9 Hz, 1H, H<sub>n</sub>), 8.78 (dd, *J* = 2.1, 0.9 Hz, 1H, H<sub>a</sub>), 8.60 (dd, *J* = 4.8, 1.6 Hz, 1H, H<sub>m</sub>), 8.55 (dd, *J* = 4.9, 1.7 Hz, 1H, H<sub>b</sub>), 7.90 (m, 1H, H<sub>k</sub>), 7.82 (dt, *J* = 7.9, 1.9 Hz, 1H, H<sub>d</sub>), 7.61-7.54 (m, 2H, 2 of H<sub>g</sub>/H<sub>h</sub>/H<sub>i</sub>/H<sub>j</sub>), 7.39-7.34 (m, 4H, H<sub>e</sub>, H<sub>i</sub>, 1 of H<sub>g</sub>/H<sub>h</sub>/H<sub>i</sub>/H<sub>j</sub>), 7.29 (ddd, *J* = 7.9, 4.9, 0.9 Hz, 1H, H<sub>c</sub>), 7.19 (app. dt, *J* = 7.1, 1.6 Hz, 1H, H<sub>g</sub>/H<sub>i</sub>), 2.09 (s, 6H, H<sub>f</sub>).

**<sup>13</sup>C NMR** (101 MHz, CDCl<sub>3</sub>) δ: 152.4 (C<sub>a</sub>), 148.8 (C<sub>m</sub>), 148.6 (C<sub>b</sub>), 148.5 (C<sub>n</sub>), 142.3, 141.4, 138.6 (C<sub>d</sub>), 138.3, 136.6, 136.5, 134.5 (C<sub>k</sub>), 130.7 (C<sub>e</sub>), 129.5 (C<sub>g</sub>/C<sub>h</sub>/C<sub>i</sub>/C<sub>j</sub>), 128.8 (C<sub>g</sub>/C<sub>i</sub>), 127.6 (C<sub>i</sub>/C<sub>g</sub>/C<sub>h</sub>/C<sub>i</sub>/C<sub>j</sub>), 125.9 (C<sub>g</sub>/C<sub>h</sub>/C<sub>i</sub>/C<sub>j</sub>), 123.7 (C<sub>i</sub>/C<sub>g</sub>/C<sub>h</sub>/C<sub>i</sub>/C<sub>j</sub>), 123.2 (C<sub>c</sub>), 121.4, 120.8, 92.9, 85.7, 20.9 (C<sub>f</sub>).

**HR-ESI-MS** *m/z* = 361.1705 [M+H]<sup>+</sup> calc. 361.1705.

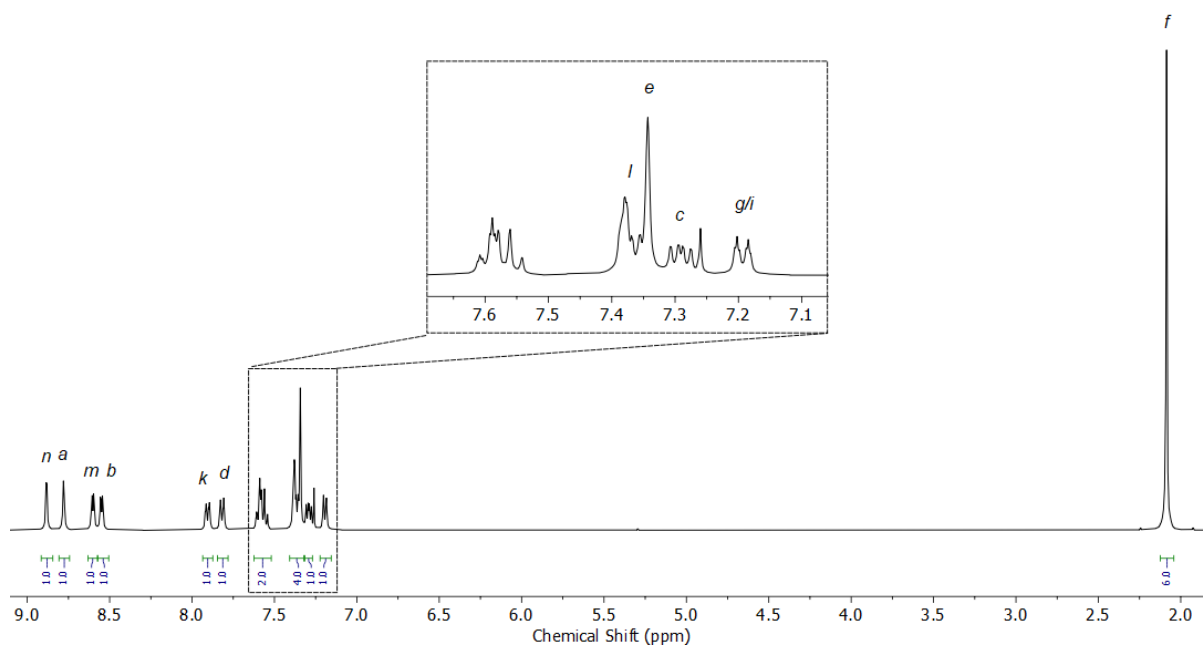

Figure S88 <sup>1</sup>H NMR (400 MHz, CDCl<sub>3</sub>) of L1<sup>XY</sup>.

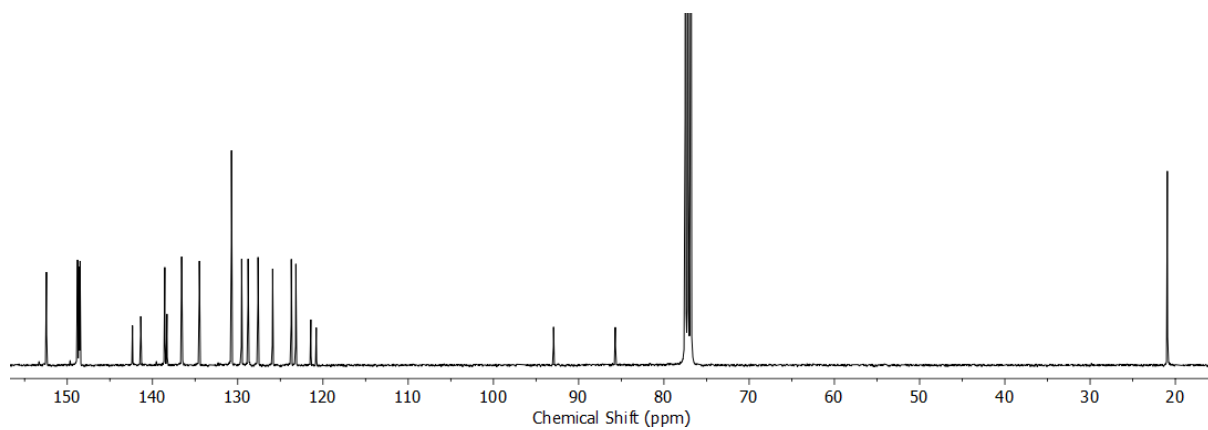

Figure S89  $^{13}\text{C}$  NMR (101 MHz,  $\text{CDCl}_3$ ) of **L1<sup>xy</sup>**.

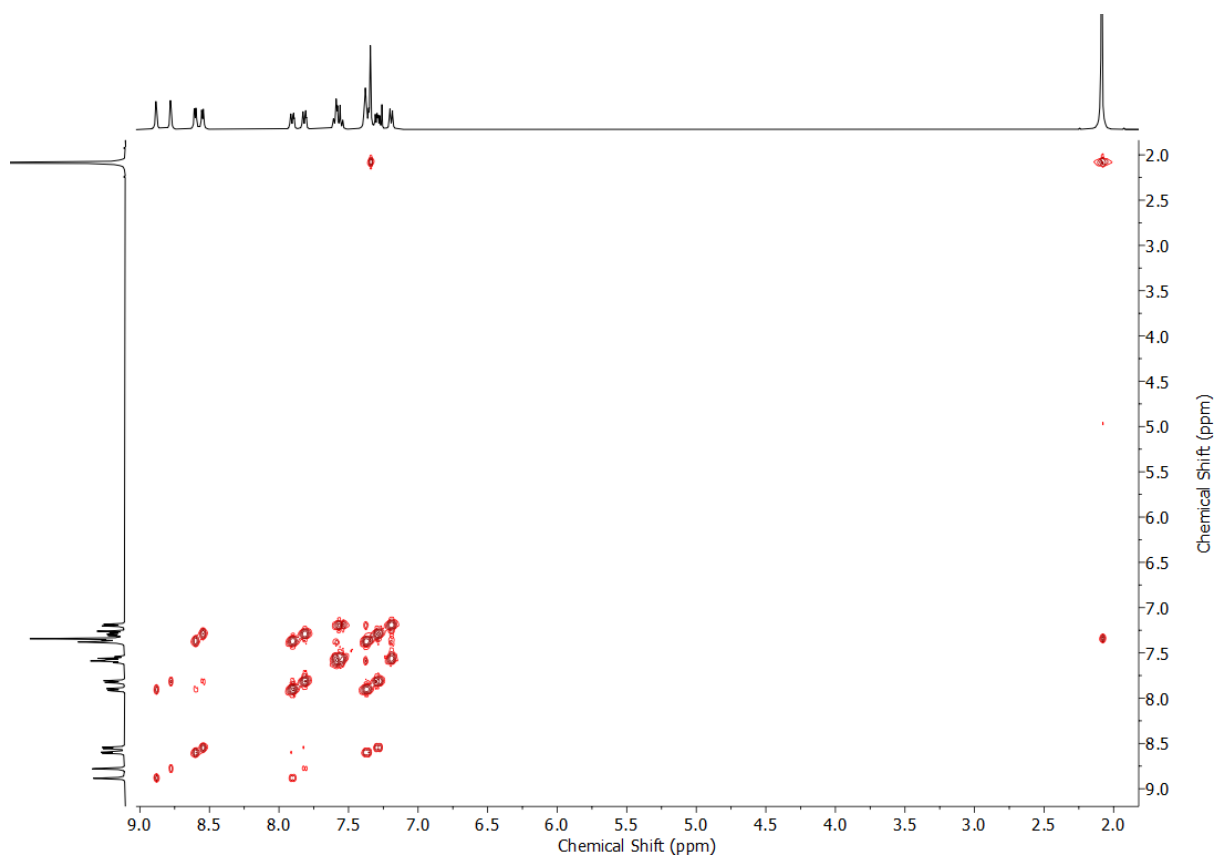

Figure S90 COSY NMR ( $\text{CDCl}_3$ ) of **L1<sup>xy</sup>**.

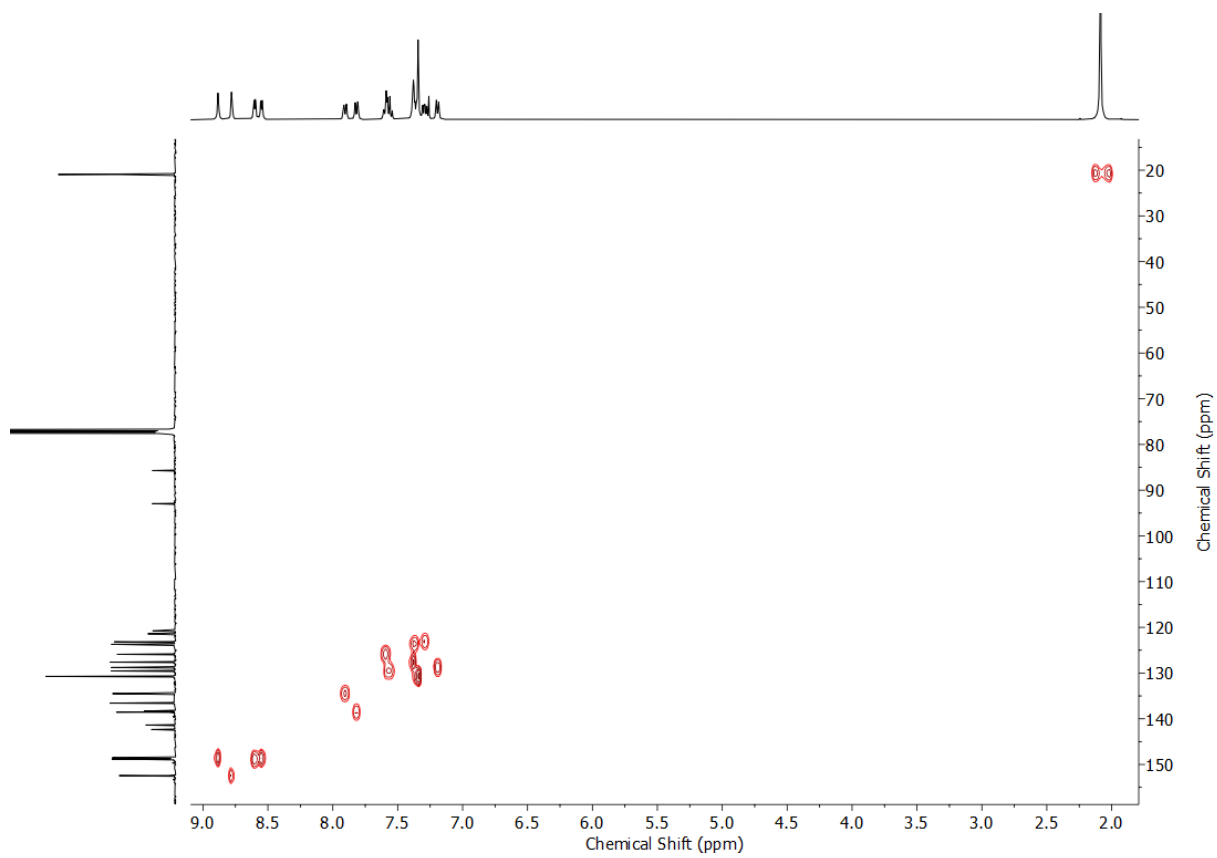

Figure S91 HSQC NMR ( $\text{CDCl}_3$ ) of  $\text{L1}^{\text{xy}}$ .

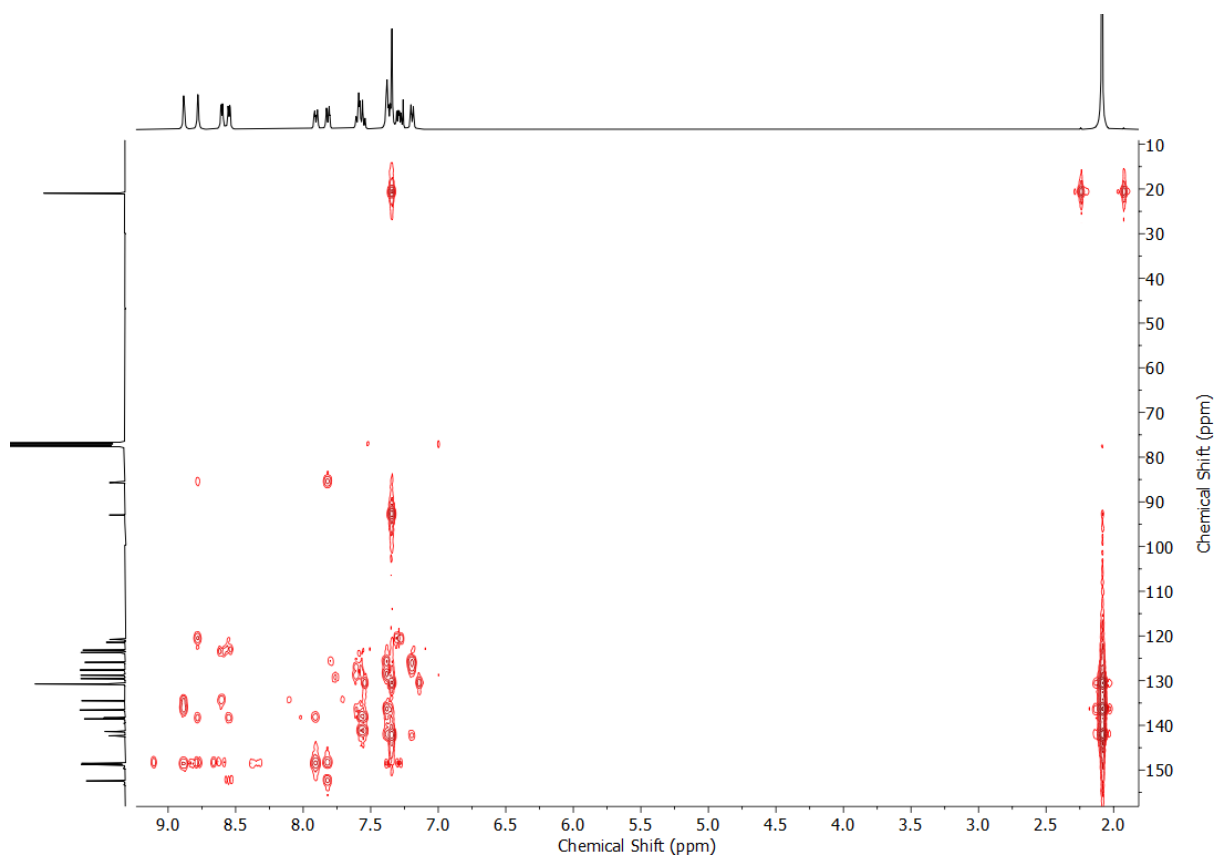

Figure S92 HMBC NMR ( $\text{CDCl}_3$ ) of  $\text{L1}^{\text{xy}}$ .

### Synthesis of *cis*-[Pd<sub>2</sub>(L1<sup>Xy</sup>)<sub>4</sub>](BF<sub>4</sub>)<sub>4</sub> (C1<sup>Xy</sup>)

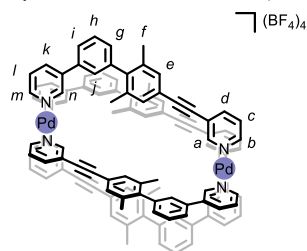

L1<sup>Xy</sup> (10.8 mg, 30 μmol, 2 eq.) and [Pd(CH<sub>3</sub>CN)<sub>4</sub>](BF<sub>4</sub>)<sub>2</sub> (6.7 mg, 15 μmol, 1 eq.) were sonicated in *d*<sub>6</sub>-DMSO (0.75 mL) until a homogenous solution was obtained. After standing at rt for 6 h, quantitative conversion to *cis*-[Pd<sub>2</sub>(L1<sup>Xy</sup>)<sub>4</sub>](BF<sub>4</sub>)<sub>4</sub> was observed by <sup>1</sup>H NMR.

<sup>1</sup>H NMR (400 MHz, *d*<sub>6</sub>-DMSO) δ: 9.61 (s, 4H, H<sub>a</sub>), 9.27 (d, *J* = 5.5 Hz, 4H, H<sub>m</sub>), 9.16-9.13 (m, 8H, H<sub>b</sub>, H<sub>n</sub>), 8.60 (d, *J* = 8.7 Hz, 4H, H<sub>k</sub>), 8.20 (app. dt, *J* = 8.0, 1.5 Hz, 4H, H<sub>d</sub>), 7.93 (dd, *J* = 8.1, 5.7 Hz, 4H, H<sub>l</sub>), 7.81 (d, *J* = 7.7 Hz, 4H, H<sub>i</sub>), 7.73-7.70 (m, 8H, H<sub>c</sub>, H<sub>j</sub>), 7.64 (app. t, *J* = 7.6 Hz, 4H, H<sub>h</sub>), 7.45 (s, 4H, H<sub>e</sub>), 7.30-7.28 (m, 8H, H<sub>e'</sub>, H<sub>g</sub>), 2.13 (s, 12H, H<sub>f</sub>), 1.99 (s, 12H, H<sub>f'</sub>).

Diffusion coefficient (400 MHz, *d*<sub>6</sub>-DMSO) *D*: 9.10 × 10<sup>-11</sup> m<sup>2</sup>s<sup>-1</sup>; *R*<sub>H</sub>: 11.0 Å.

<sup>13</sup>C NMR (101 MHz, *d*<sub>6</sub>-DMSO) δ: 152.6 (C<sub>a</sub>), 150.6 (C<sub>b</sub>/C<sub>n</sub>), 149.6 (C<sub>m</sub>), 149.0 (C<sub>b</sub>/C<sub>n</sub>), 142.6 (C<sub>d</sub>), 142.5, 140.2, 138.4 (C<sub>k</sub>), 137.7, 137.0, 136.7, 134.3, 130.3 (C<sub>e</sub>), 130.1 (C<sub>h</sub>), 129.8 (C<sub>e'</sub>/C<sub>g</sub>), 129.8 (C<sub>e'</sub>/C<sub>g</sub>), 127.5 (C<sub>i</sub>), 127.2 (C<sub>d</sub>/C<sub>j</sub>), 126.3 (C<sub>i</sub>), 126.2 (C<sub>d</sub>/C<sub>j</sub>), 122.4, 119.7, 94.0, 82.7, 20.6 (C<sub>f</sub>/C<sub>f'</sub>), 20.5 (C<sub>f</sub>/C<sub>f'</sub>).

ESI-MS *m/z* = 914.73 {[Pd<sub>2</sub>(L1<sup>Xy</sup>)<sub>4</sub>](BF<sub>4</sub>)<sub>2</sub>}<sup>2+</sup> calc. 914.73; 1874.41 {[Pd<sub>2</sub>(L1<sup>Xy</sup>)<sub>4</sub>](BF<sub>4</sub>)<sub>2</sub>(HCO<sub>2</sub>)<sub>2</sub>}<sup>+</sup> calc. 1874.47.

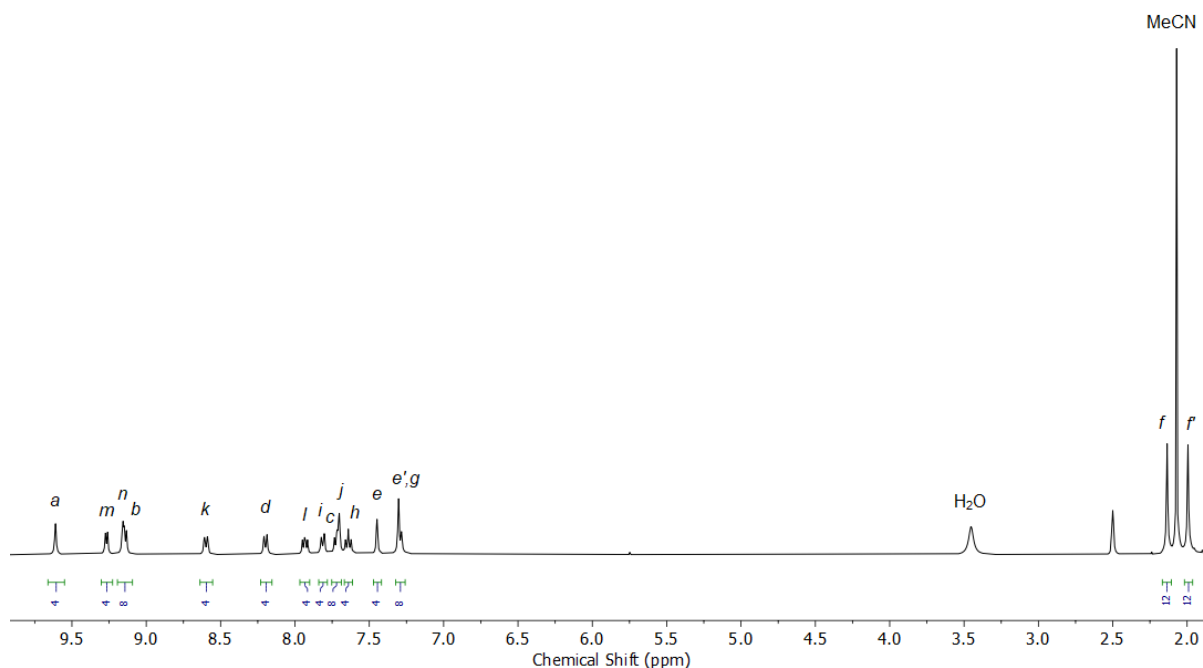

Figure S93 <sup>1</sup>H NMR (400 MHz, *d*<sub>6</sub>-DMSO) of [Pd<sub>2</sub>(L1<sup>Xy</sup>)<sub>4</sub>](BF<sub>4</sub>)<sub>4</sub>.



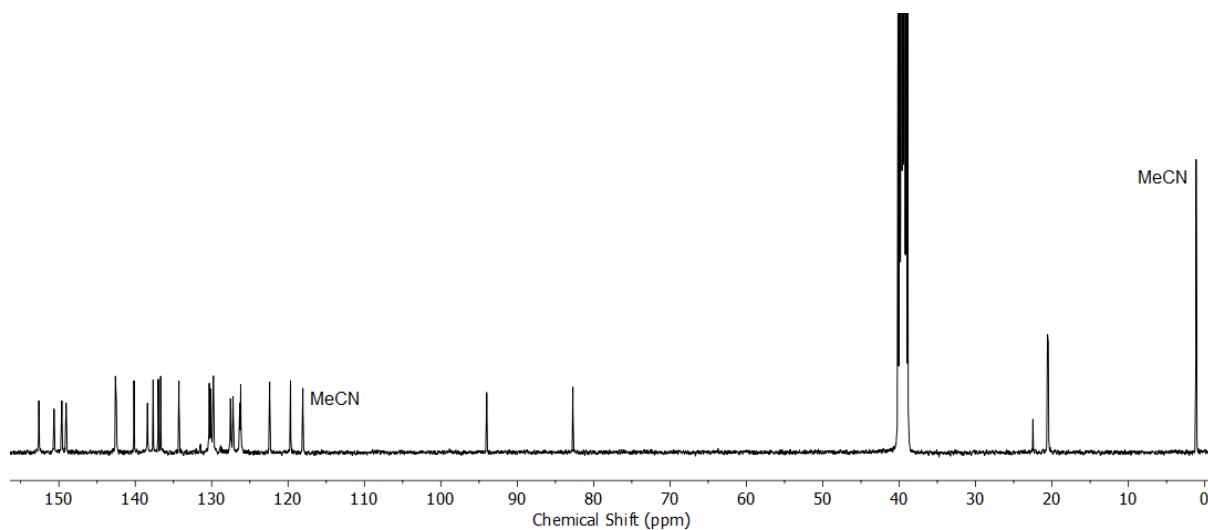

Figure S94  $^{13}\text{C}$  NMR (101 MHz,  $d_6$ -DMSO) of  $[\text{Pd}_2(\text{L1}^{\text{xy}})_4](\text{BF}_4)_4$ .

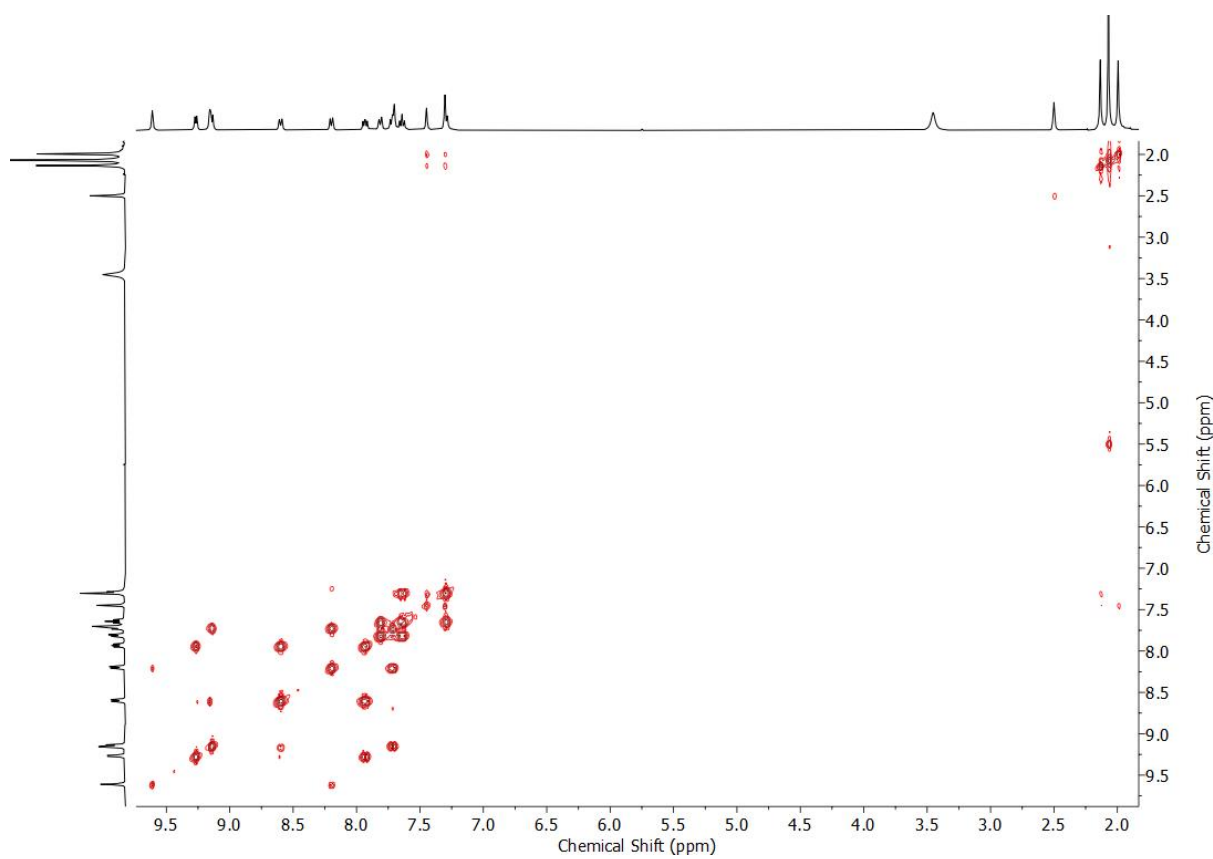

Figure S95 COSY NMR ( $d_6$ -DMSO) of  $[\text{Pd}_2(\text{L1}^{\text{xy}})_4](\text{BF}_4)_4$ .

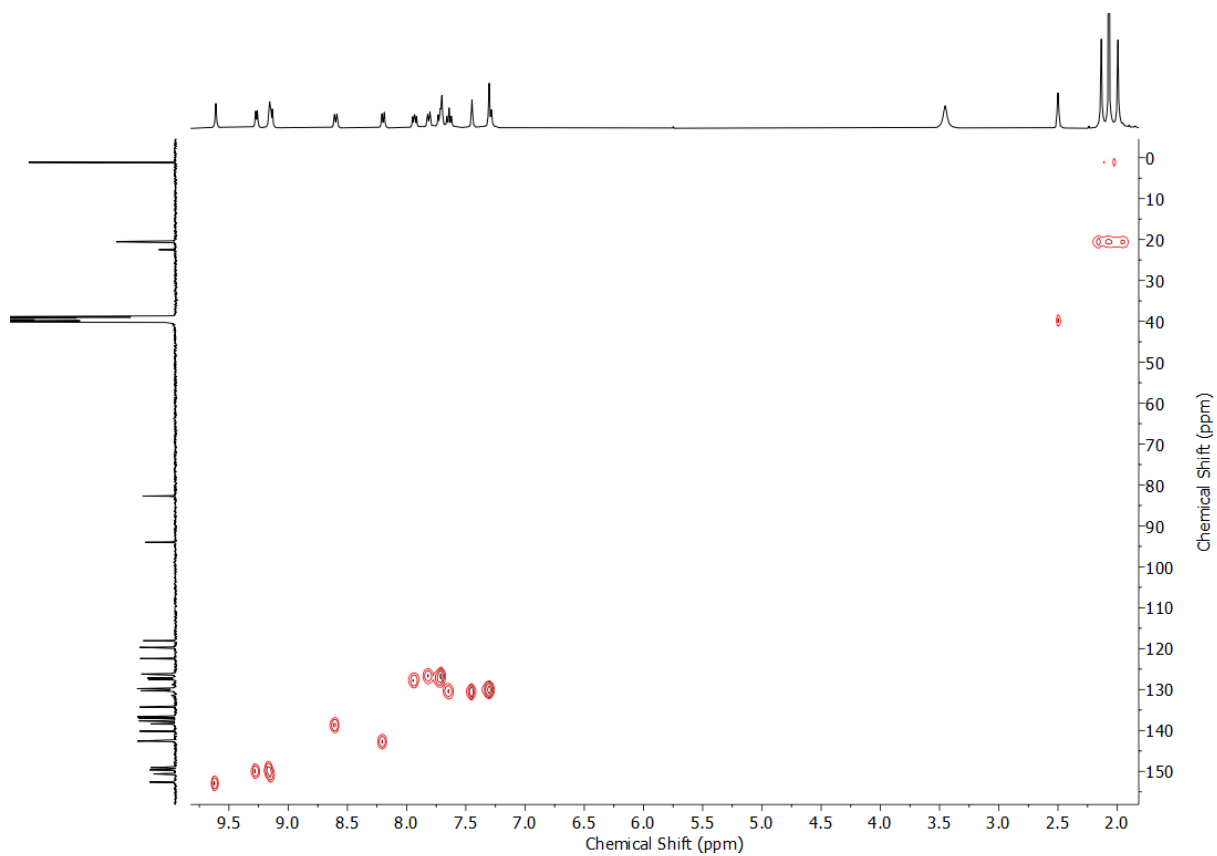

Figure S96 HSQC NMR ( $d_6$ -DMSO) of  $[\text{Pd}_2(\text{L1}^{\text{xy}})_4](\text{BF}_4)_4$ .

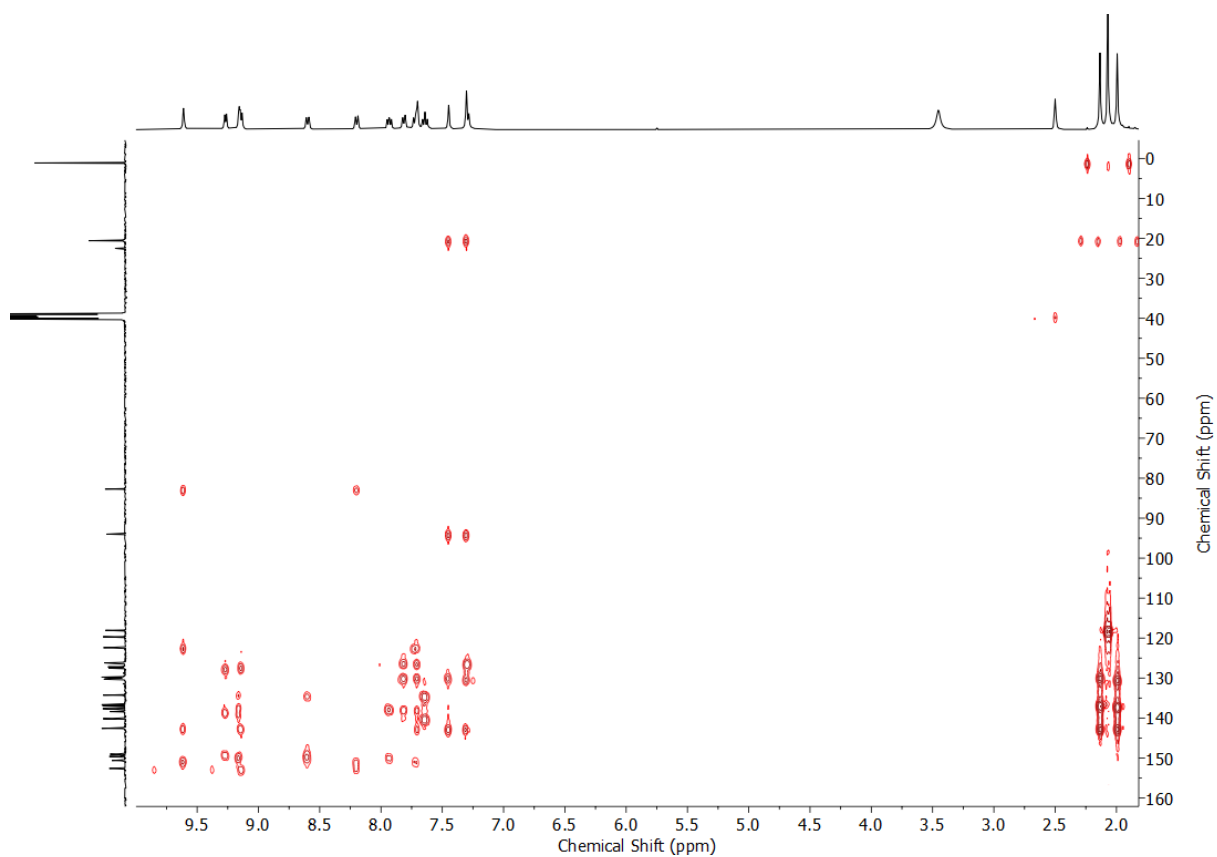

Figure S97 HMBC NMR ( $d_6$ -DMSO) of  $[\text{Pd}_2(\text{L1}^{\text{xy}})_4](\text{BF}_4)_4$ .

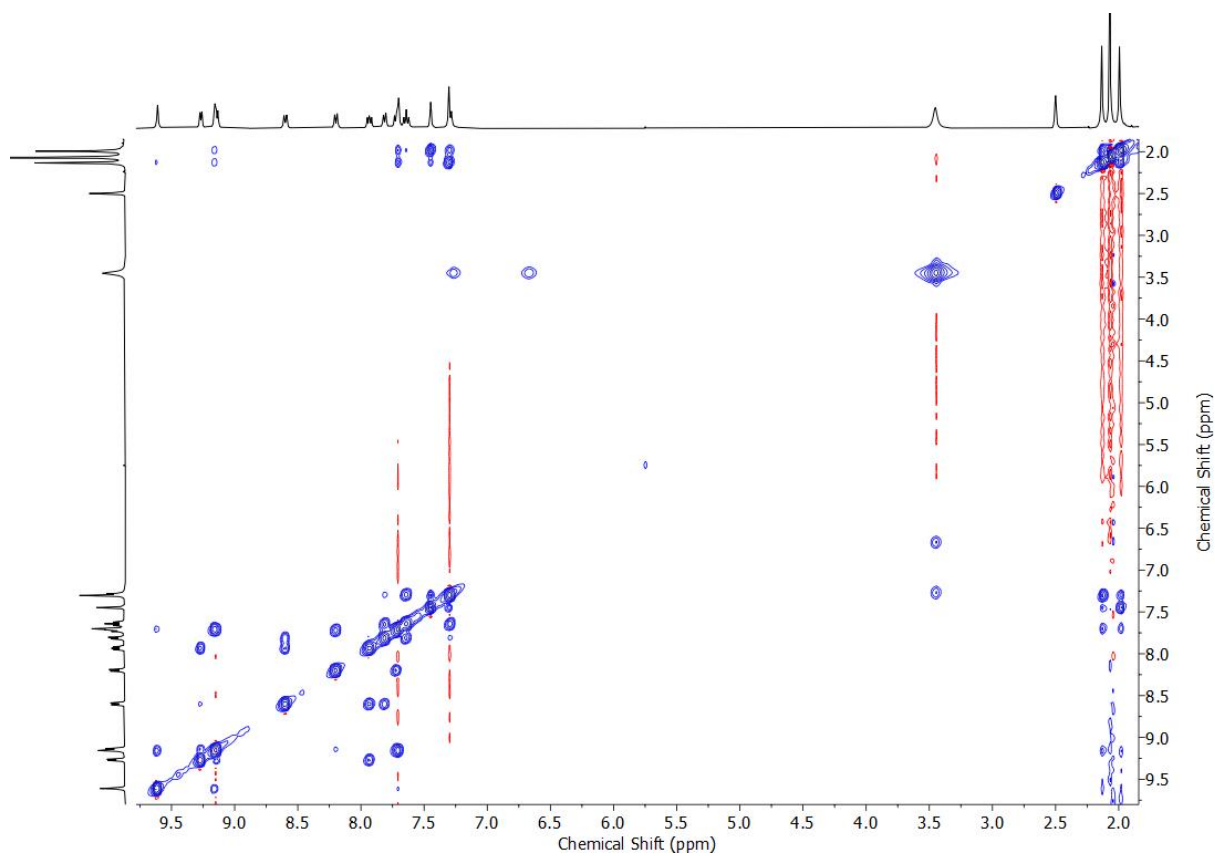

Figure S98 NOESY ( $d_6$ -DMSO) of  $[\text{Pd}_2(\text{L1}^{\text{xy}})_4](\text{BF}_4)_4$ .

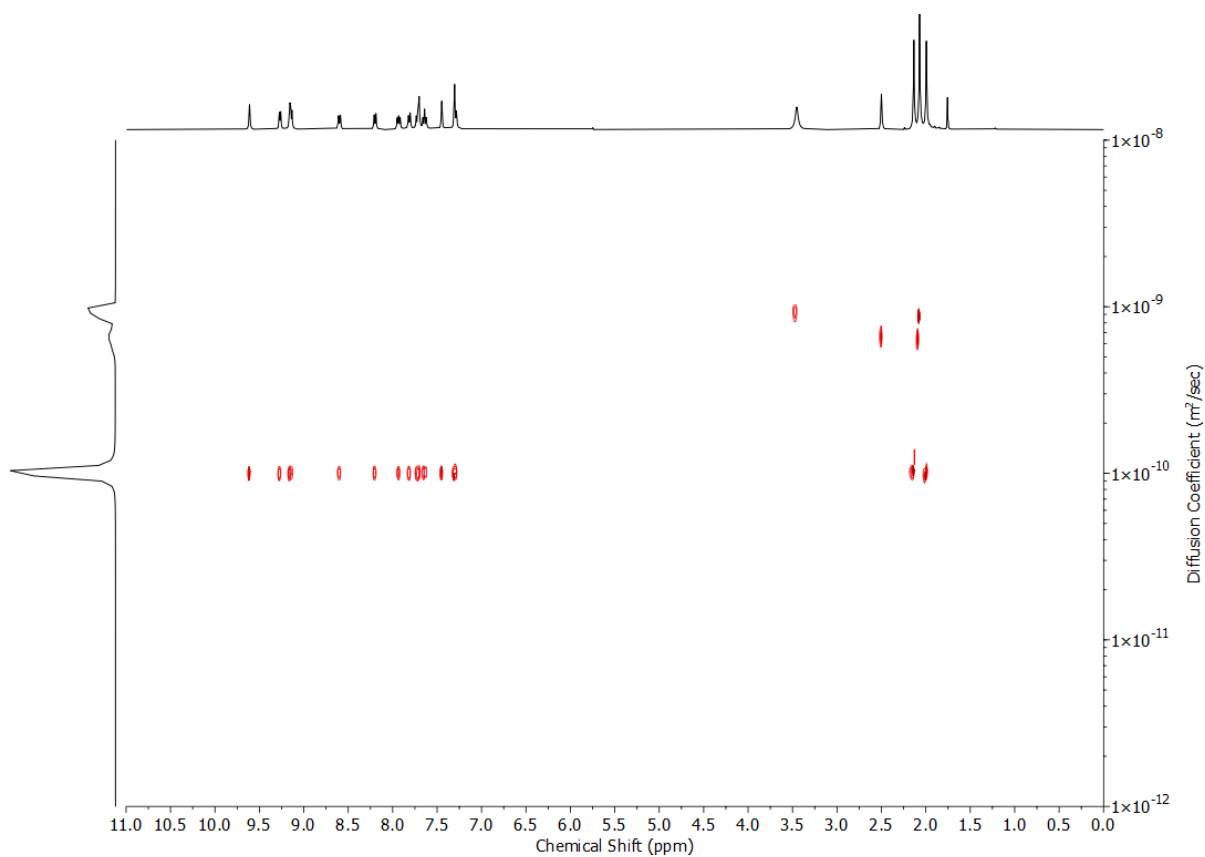

Figure S99 DOSY ( $d_6$ -DMSO) of  $[\text{Pd}_2(\text{L1}^{\text{xy}})_4](\text{BF}_4)_4$ .

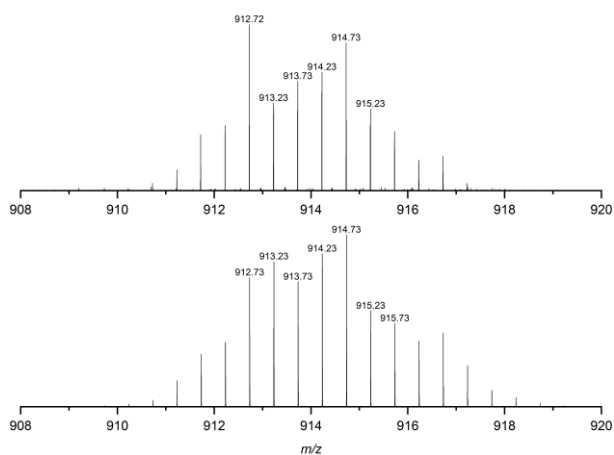

Figure S100 Observed (top) and calculated (bottom) isotopic patterns for  $\{[Pd_2(L1^{Xy})_4](BF_4)_2\}^{2+}$ .

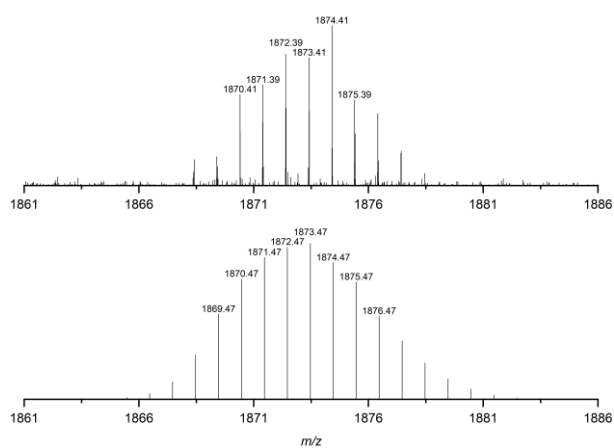

Figure S101 Observed (top) and calculated (bottom) isotopic patterns for  $\{[Pd_2(L1^{Xy})_4](BF_4)_2(HCO_2)\}^+$ .

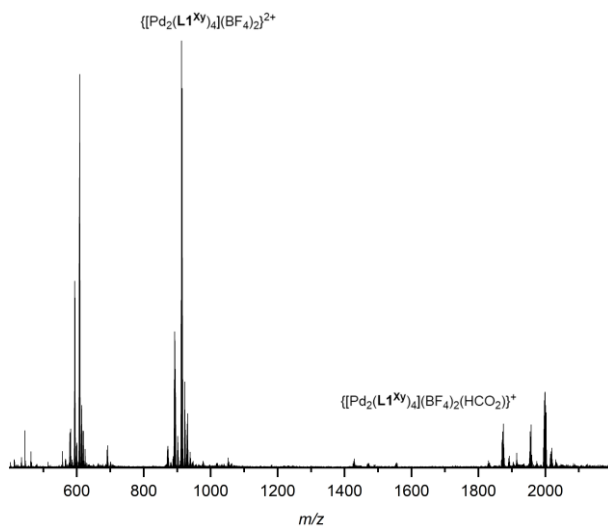

Figure S102 ESI-MS of  $[Pd_2(L1^{Xy})_4](BF_4)_4$ .

## Synthesis of S10

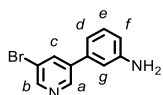

3-Aminophenylboronic acid (1.37 g, 10.0 mmol, 1 eq.), 3,5-dibromopyridine (3.55 g, 15.0 mmol, 1.5 eq.), Pd(PPh<sub>3</sub>)<sub>2</sub>Cl<sub>2</sub> (0.070 g, 0.10 mmol, 1 mol%) and K<sub>2</sub>CO<sub>3</sub> (3.46 g, 25.0 mmol, 2.5 eq.) were stirred at 80 °C in 2:1 1,4-dioxane/H<sub>2</sub>O (30 mL) for 22 h. H<sub>2</sub>O (100 mL) was added and the reaction mixture extracted with CH<sub>2</sub>Cl<sub>2</sub> (3 × 50 mL). The combined organic phases were dried (MgSO<sub>4</sub>) and the solvent removed *in vacuo*. Following purification by column chromatography on silica gel (1:19 acetone/CH<sub>2</sub>Cl<sub>2</sub>) the product was obtained as a waxy off-white solid (1.66 g, 67%).

<sup>1</sup>H NMR (400 MHz, CDCl<sub>3</sub>) δ: 8.72 (d, *J* = 1.9 Hz, 1H, H<sub>a/b</sub>), 8.63 (d, *J* = 2.2 Hz, 1H, H<sub>a/b</sub>), 7.98 (app. t, *J* = 2.1 Hz, 1H, H<sub>c</sub>), 7.26 (m, H<sub>e</sub>), 6.93 (d, *J* = 7.6 Hz, 1H, H<sub>d/f</sub>), 6.84 (s, H<sub>g</sub>) 6.74 (dd, *J* = 8.1, 2.3 Hz, 1H, H<sub>d/f</sub>).

<sup>13</sup>C NMR (101 MHz, CDCl<sub>3</sub>) δ: 149.4 (C<sub>d/C<sub>b</sub></sub>), 147.3, 146.5 (C<sub>d/C<sub>b</sub></sub>), 138.6, 137.6, 137.0 (C<sub>c</sub>), 130.3 (C<sub>e</sub>), 121.0, 117.6 (C<sub>d/C<sub>f</sub></sub>), 115.5 (C<sub>g</sub>), 113.6 (C<sub>d/C<sub>f</sub></sub>).

HR-ESI-MS *m/z* = 249.0031 [M+H]<sup>+</sup> calc. 249.0022.

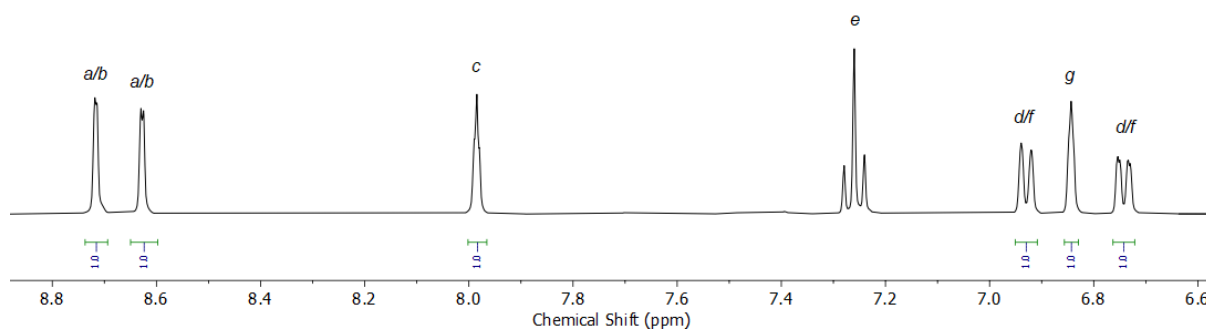

Figure S103 <sup>1</sup>H NMR (400 MHz, CDCl<sub>3</sub>) of **S10**.

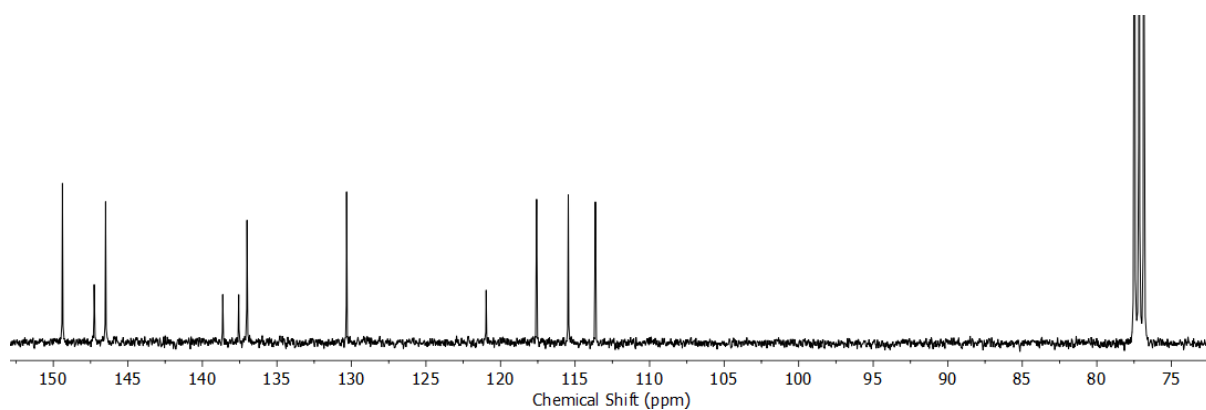

Figure S104 <sup>13</sup>C NMR (101 MHz, CDCl<sub>3</sub>) of **S10**.

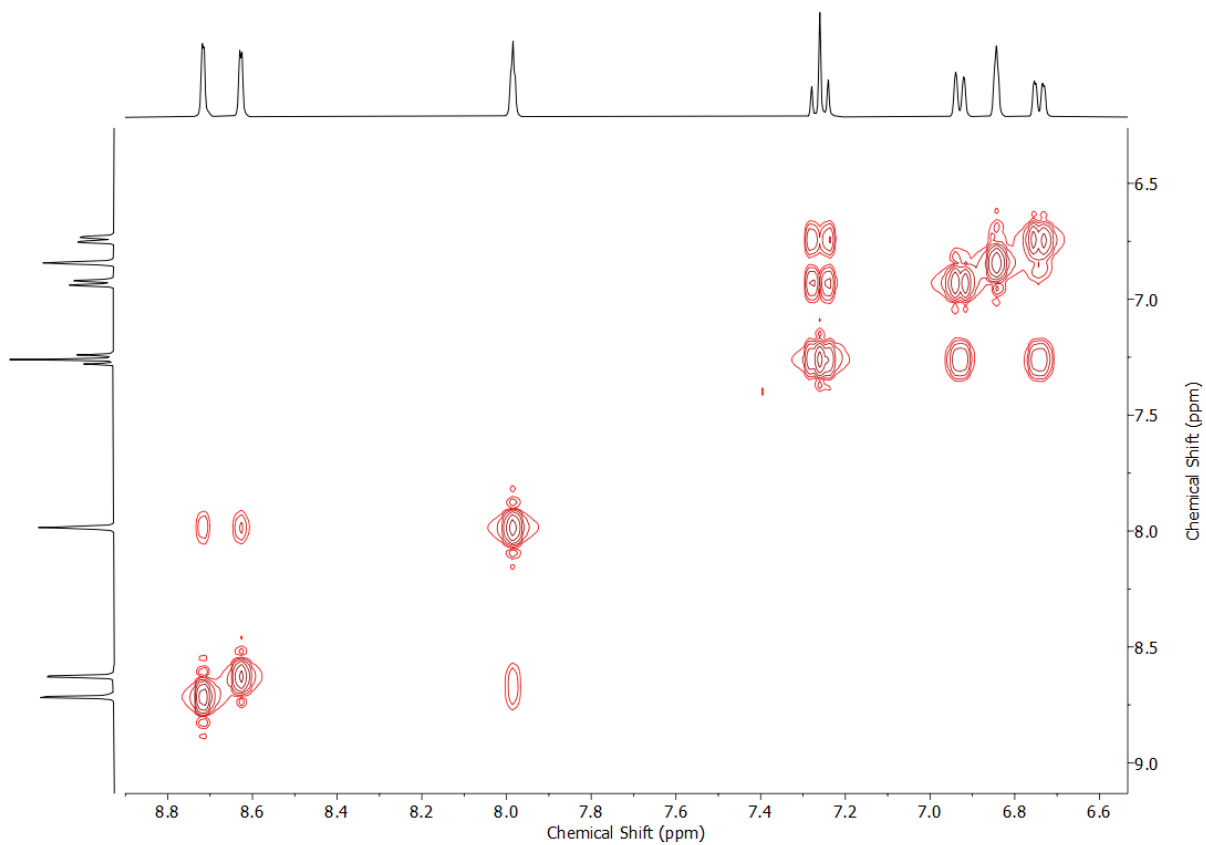

Figure S105 COSY NMR (CDCl<sub>3</sub>) of **S10**.

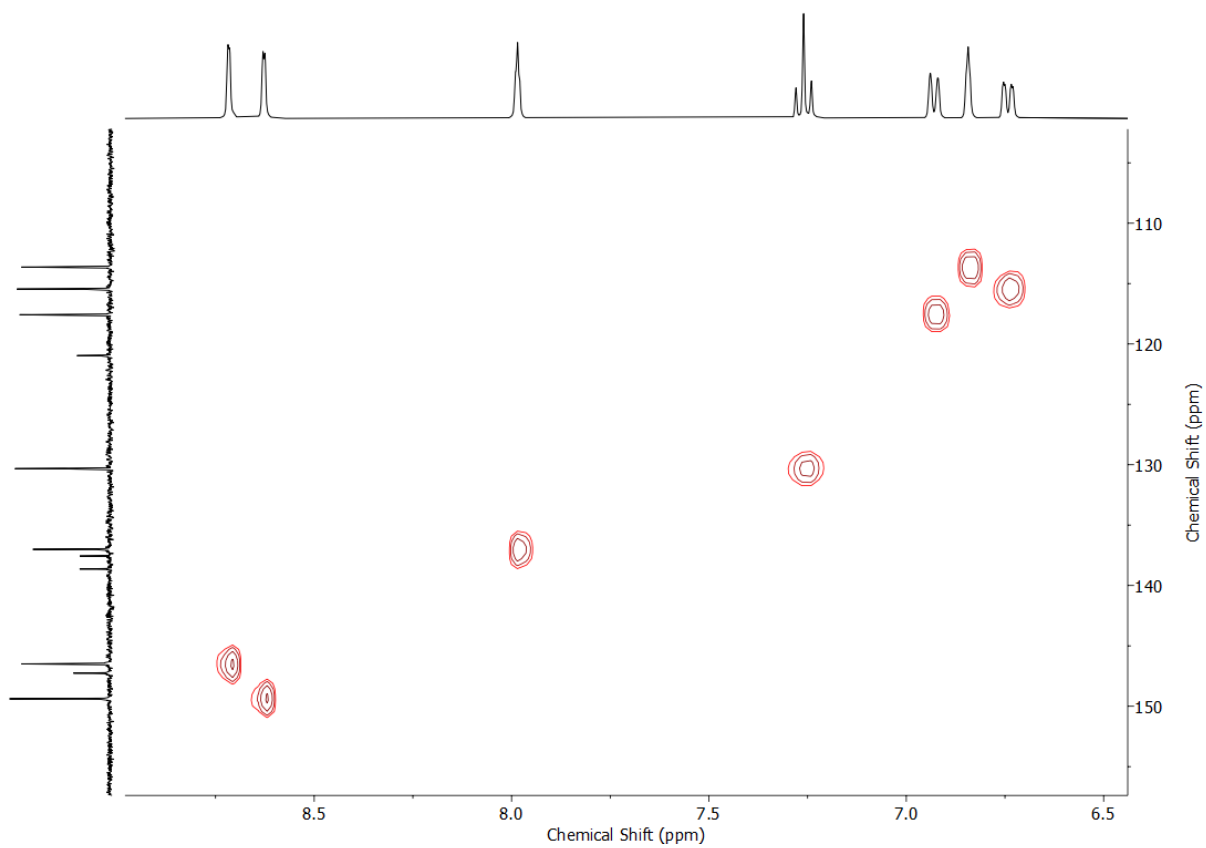

Figure S106 HSQC NMR (CDCl<sub>3</sub>) of **S10**.

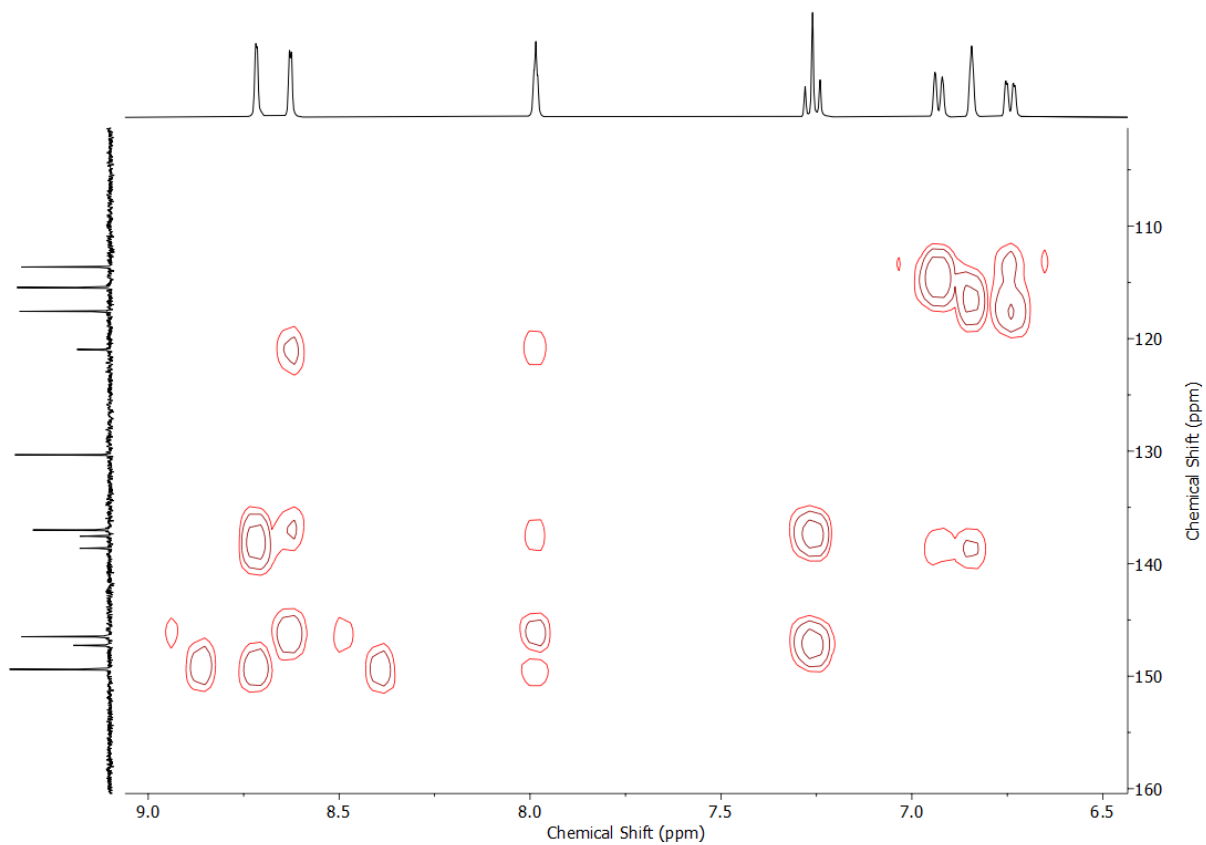

Figure S107 HMBC NMR (CDCl<sub>3</sub>) of S10.

## Synthesis of S11

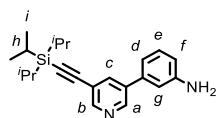

**S10** (1.25 g, 5.0 mmol, 1.0 eq.), triisopropylsilylacetylene (1.35 mL, 6.0 mmol, 1.2 eq.), Pd(PPh<sub>3</sub>)<sub>2</sub>Cl<sub>2</sub> (0.070 g, 0.10 mmol, 2 mol%) and CuI (0.048 g, 0.25 mmol, 5 mol%) in 1:1 1,4-dioxane/*i*Pr<sub>2</sub>NH (20 mL) were stirred at 80 °C in a sealed vial for 20 h. EDTA solution (50 mL) was added to the cooled reaction mixture and extracted with CH<sub>2</sub>Cl<sub>2</sub> (3 × 25 mL), dried (MgSO<sub>4</sub>) and the solvent removed *in vacuo*. After purification by column chromatography on silica gel (15:85 EtOAc/pentane) the product was obtained as a brown oil (1.74 g, 99%).

**<sup>1</sup>H NMR** (500 MHz, CD<sub>3</sub>OD) δ: 8.71 (br. s, 1H, H<sub>a</sub>/H<sub>b</sub>), 8.54 (br. s, 1H, H<sub>a</sub>/H<sub>b</sub>), 7.98 (s, 1H, H<sub>c</sub>), 7.21 (app. t, *J* = 7.9 Hz, 1H, H<sub>e</sub>), 6.97 (t, *J* = 1.9 Hz, 1H, H<sub>g</sub>), 6.92 (ddd, *J* = 7.6, 1.7, 0.9 Hz, 1H, H<sub>d</sub>/H<sub>f</sub>), 6.77 (ddd, *J* = 8.0, 2.3, 0.9 Hz, 1H, H<sub>d</sub>/H<sub>f</sub>), 1.16 (app. s, 21H, H<sub>h</sub>, H<sub>i</sub>).

**<sup>13</sup>C NMR** (126 MHz, CD<sub>3</sub>OD) δ: 151.0 (C<sub>a</sub>/C<sub>b</sub>), 149.9, 147.7 (C<sub>a</sub>/C<sub>b</sub>), 138.4, 138.3, 131.0 (C<sub>e</sub>), 117.5 (C<sub>d</sub>/C<sub>f</sub>), 116.7 (C<sub>d</sub>/C<sub>f</sub>), 114.6 (C<sub>g</sub>), 104.5, 96.0, 19.0 (C<sub>i</sub>), 12.4 (C<sub>h</sub>) (2 × 4° signals missing).

**HR-EI-MS** *m/z* = 350.2181 [M]<sup>+</sup> calc. 350.2173.

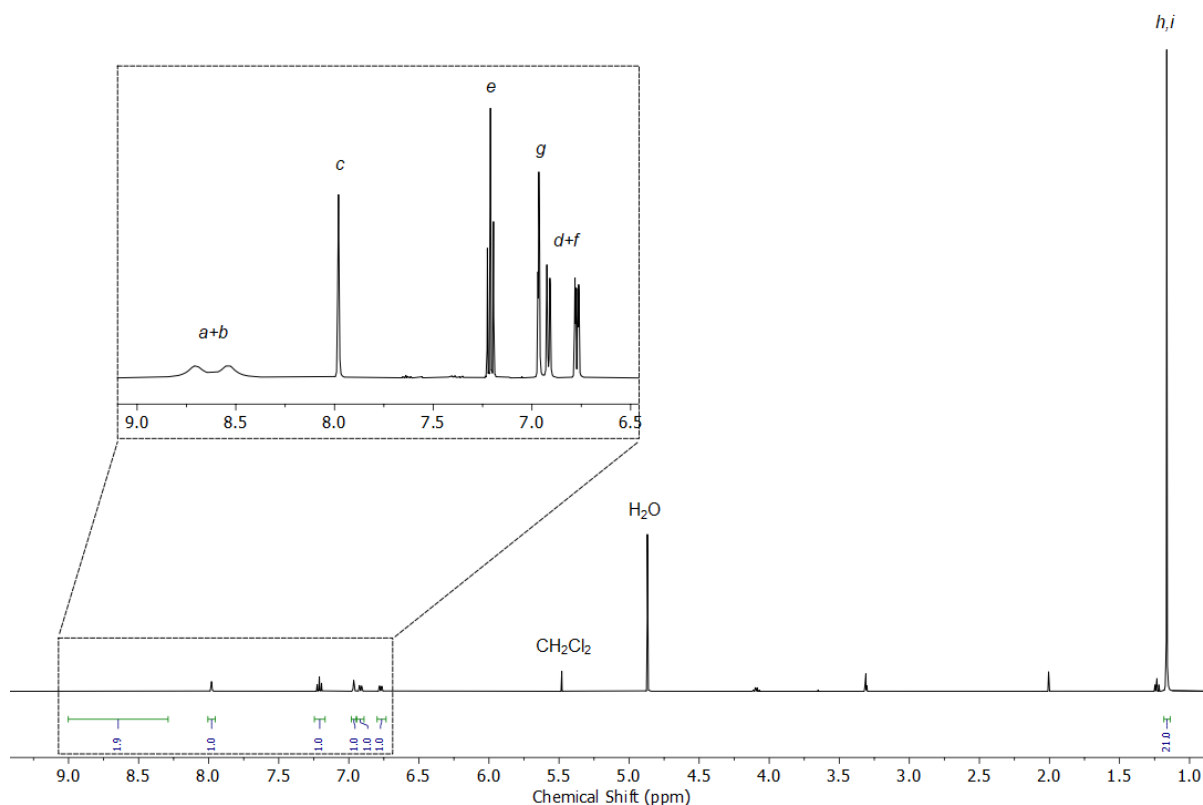

Figure S108 <sup>1</sup>H NMR (500 MHz, CD<sub>3</sub>OD) of **S11**.



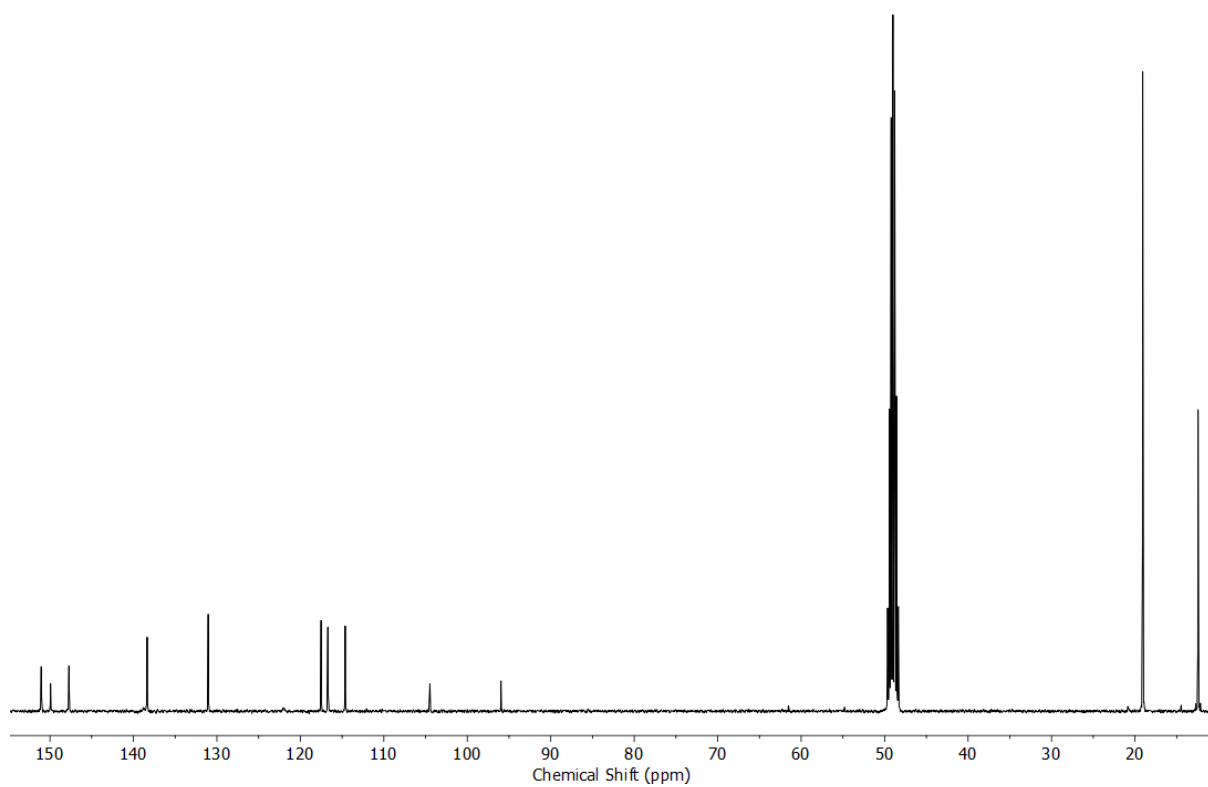

Figure S109  $^{13}\text{C}$  NMR (126 MHz,  $\text{CD}_3\text{OD}$ ) of **S11**.

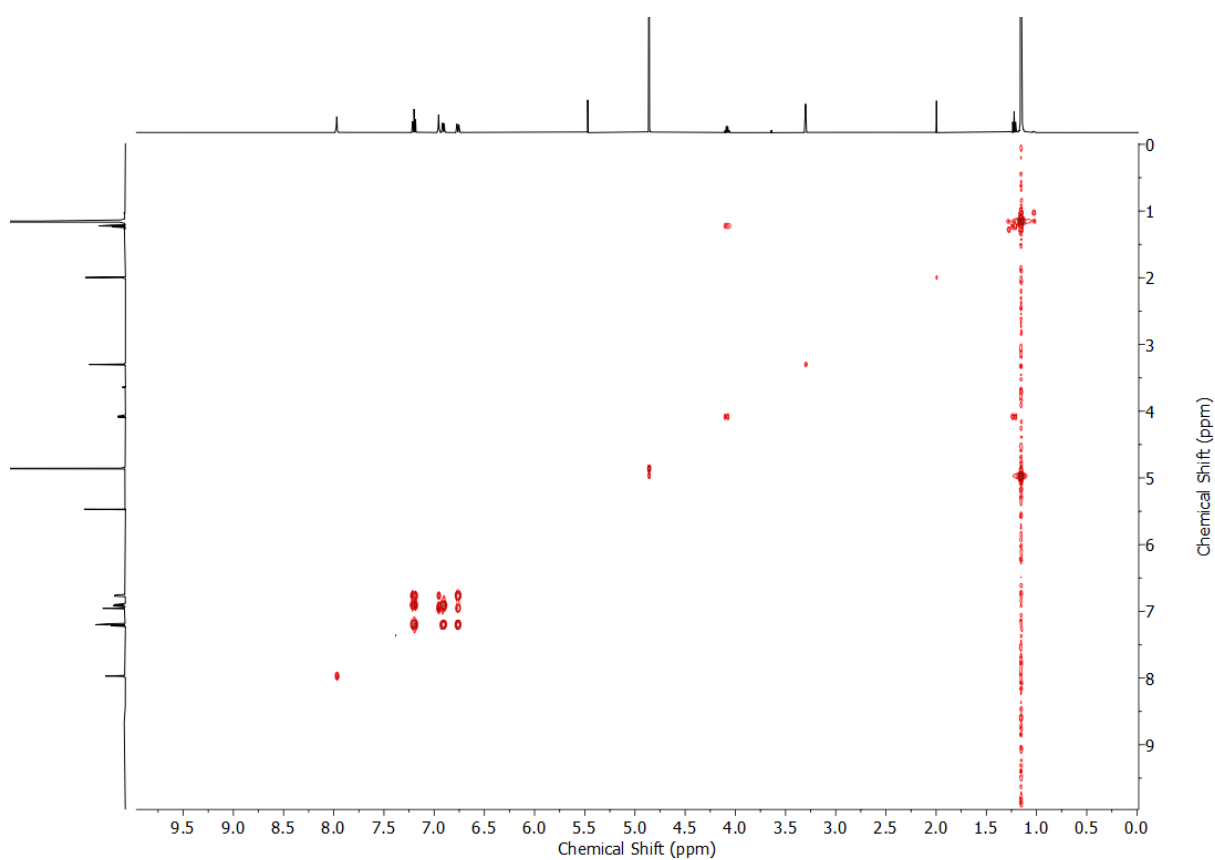

Figure S110 COSY NMR ( $\text{CD}_3\text{OD}$ ) of **S11**.

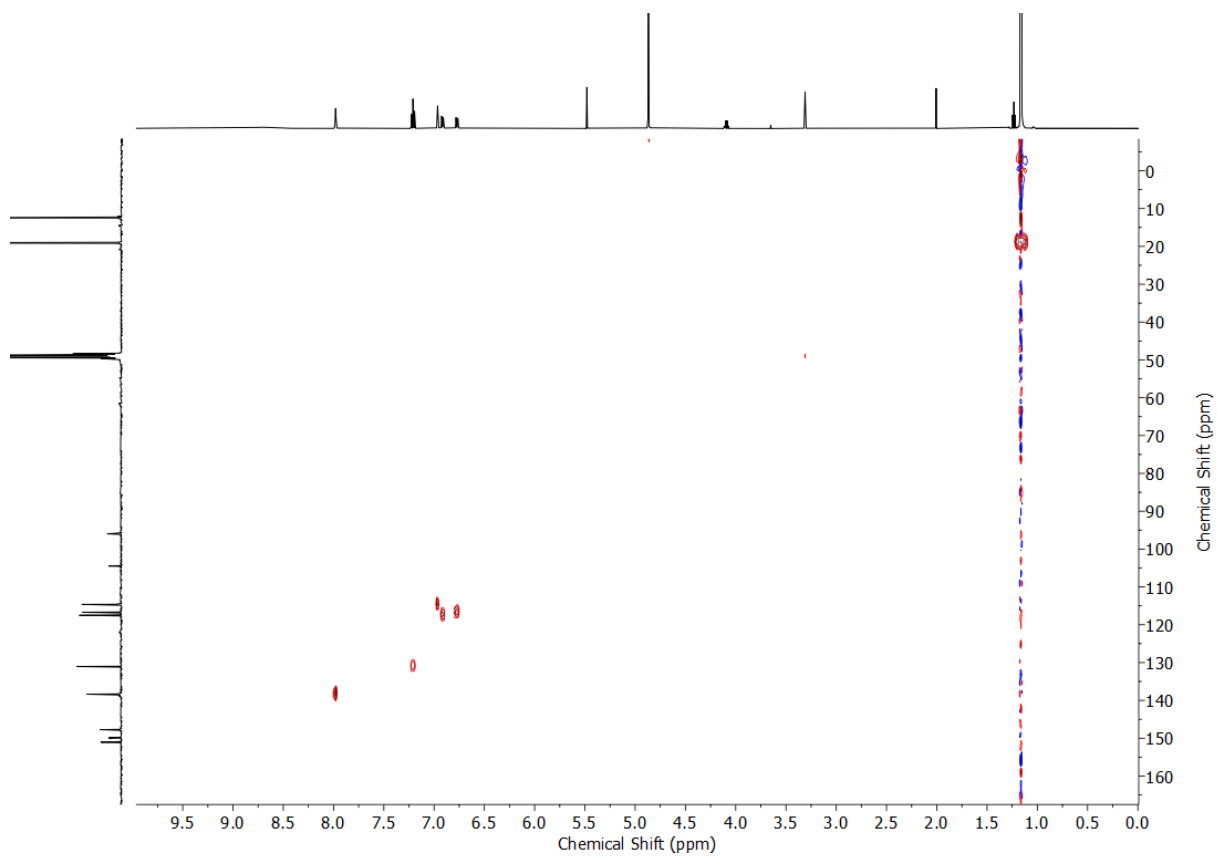

Figure S111 HSQC NMR ( $\text{CD}_3\text{OD}$ ) of **S11**.

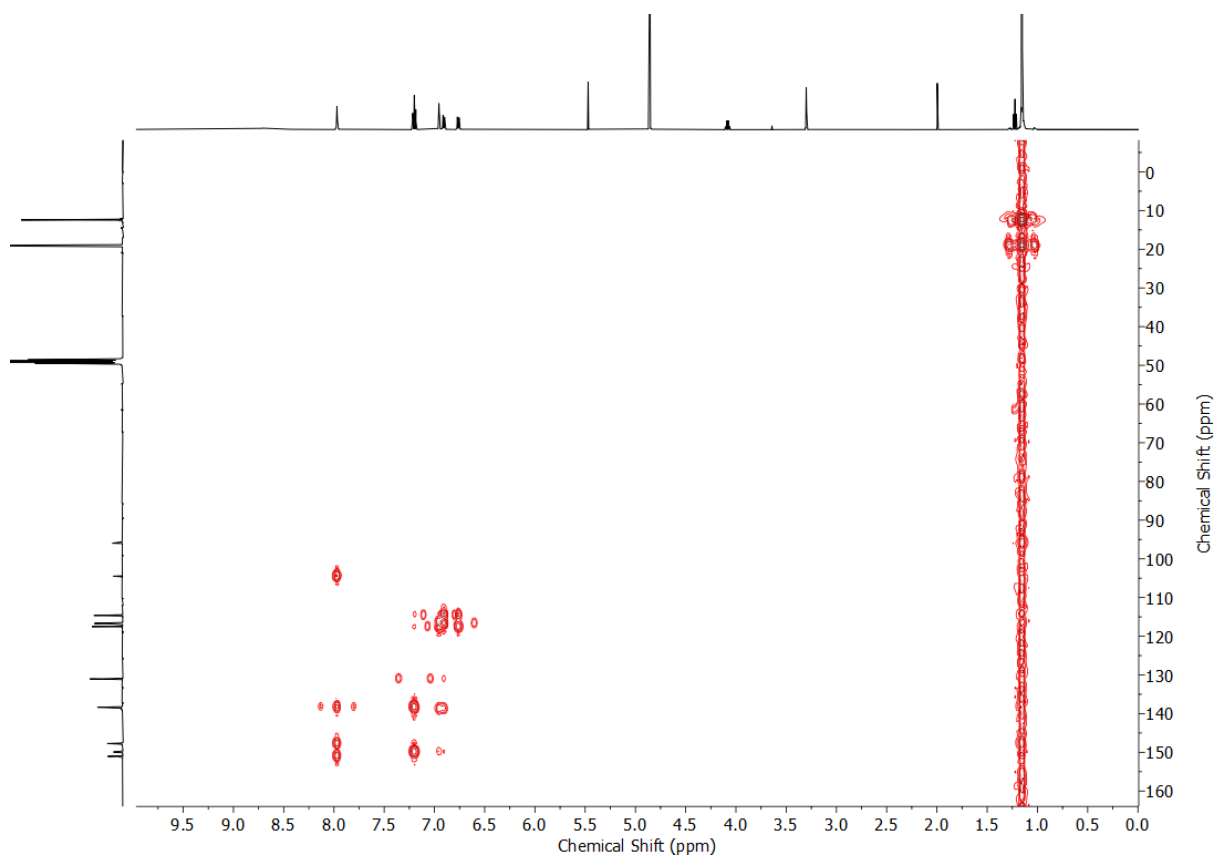

Figure S112 HMBC NMR ( $\text{CD}_3\text{OD}$ ) of **S11**.

## Synthesis of S12

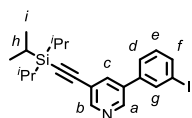

To a solution of **S11** (1.72 g, 4.91 mmol, 1.0 eq) in CH<sub>3</sub>CN (30 mL) was added TsOH·H<sub>2</sub>O (2.80 g, 14.7 mmol, 3.0 eq.). The resultant suspension was cooled to 0 °C and NaNO<sub>2</sub> (0.677 g, 9.81 mmol, 2.0 eq) and KI (2.04 g, 12.3 mmol, 2.5 eq.) in H<sub>2</sub>O (3 mL) was added dropwise. The reaction mixture was allowed to warm to rt and stirred for 17 h. H<sub>2</sub>O (50 mL), sat. aq. NaHCO<sub>3</sub> (50 mL) and 0.5 M Na<sub>2</sub>S<sub>2</sub>O<sub>3</sub> (50 mL) were added and extracted with EtOAc (3 × 50 mL). The combined organic phases were dried (MgSO<sub>4</sub>) and the solvent removed *in vacuo*. After purification by column chromatography on silica gel (5:95 EtOAc/pentane) the product was obtained as a yellow oil (1.56 g, 69%).

**<sup>1</sup>H NMR** (400 MHz, CDCl<sub>3</sub>) δ: 8.69 (br. s, 2H, H<sub>a</sub>, H<sub>b</sub>), 7.92-7.90 (m, 2H, H<sub>c</sub>, H<sub>g</sub>), 7.76 (ddd, *J* = 7.9, 1.7, 1.0 Hz, 1H, H<sub>d</sub>/H<sub>f</sub>), 7.53 (ddd, *J* = 7.8, 1.8, 1.0 Hz, 1H, H<sub>d</sub>/H<sub>f</sub>), 7.22 (app. t, *J* = 7.8 Hz, 1H, H<sub>e</sub>), 1.15-1.14 (m, 21H, H<sub>h</sub>, H<sub>i</sub>).

**<sup>13</sup>C NMR** (101 MHz, CDCl<sub>3</sub>) δ: 151.5 (C<sub>a</sub>/C<sub>b</sub>), 146.6 (C<sub>a</sub>/C<sub>b</sub>), 139.2, 137.6 (C<sub>c</sub>/C<sub>d</sub>/C<sub>f</sub>/C<sub>g</sub>), 137.5 (C<sub>c</sub>/C<sub>d</sub>/C<sub>f</sub>/C<sub>g</sub>), 136.2 (C<sub>c</sub>/C<sub>g</sub>), 135.0, 130.9 (C<sub>e</sub>), 126.6 (C<sub>d</sub>/C<sub>f</sub>), 121.0, 103.0, 96.0, 95.1, 18.8 (C<sub>i</sub>), 11.4 (C<sub>h</sub>).

**HR-EI-MS** *m/z* = 461.1032 [M]<sup>+</sup> calc. 461.1030.

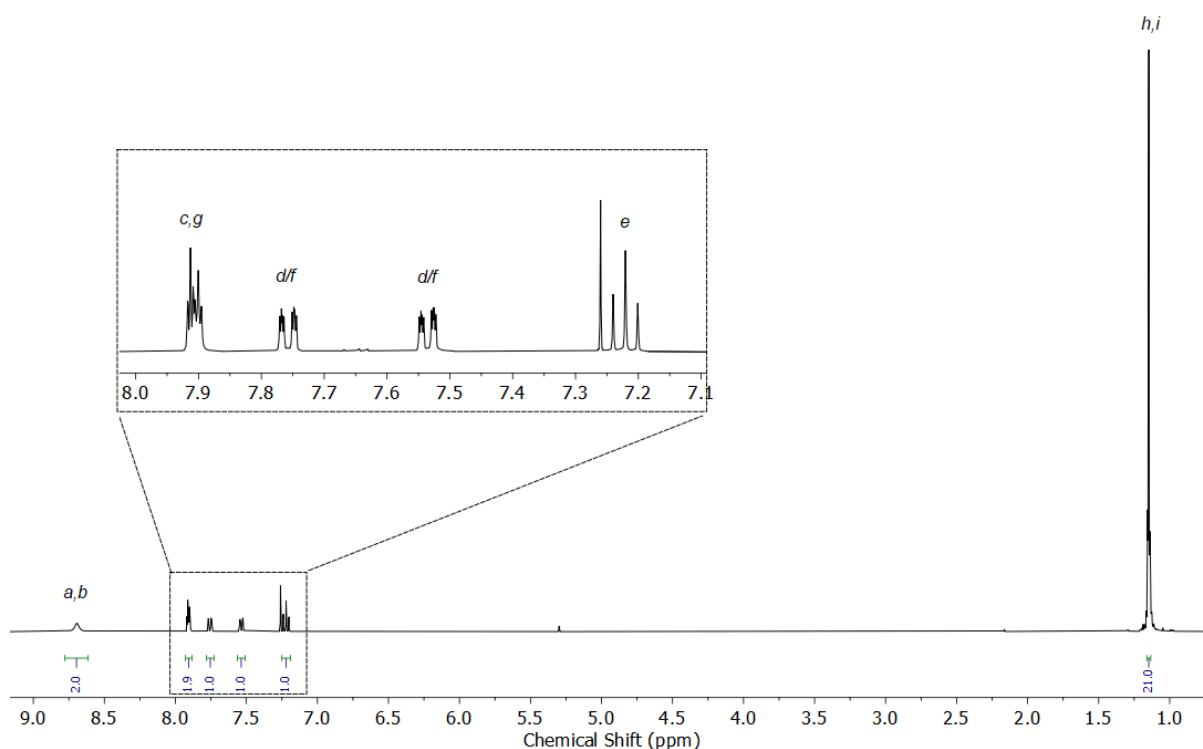

Figure S113 <sup>1</sup>H NMR (400 MHz, CDCl<sub>3</sub>) of **S12**.

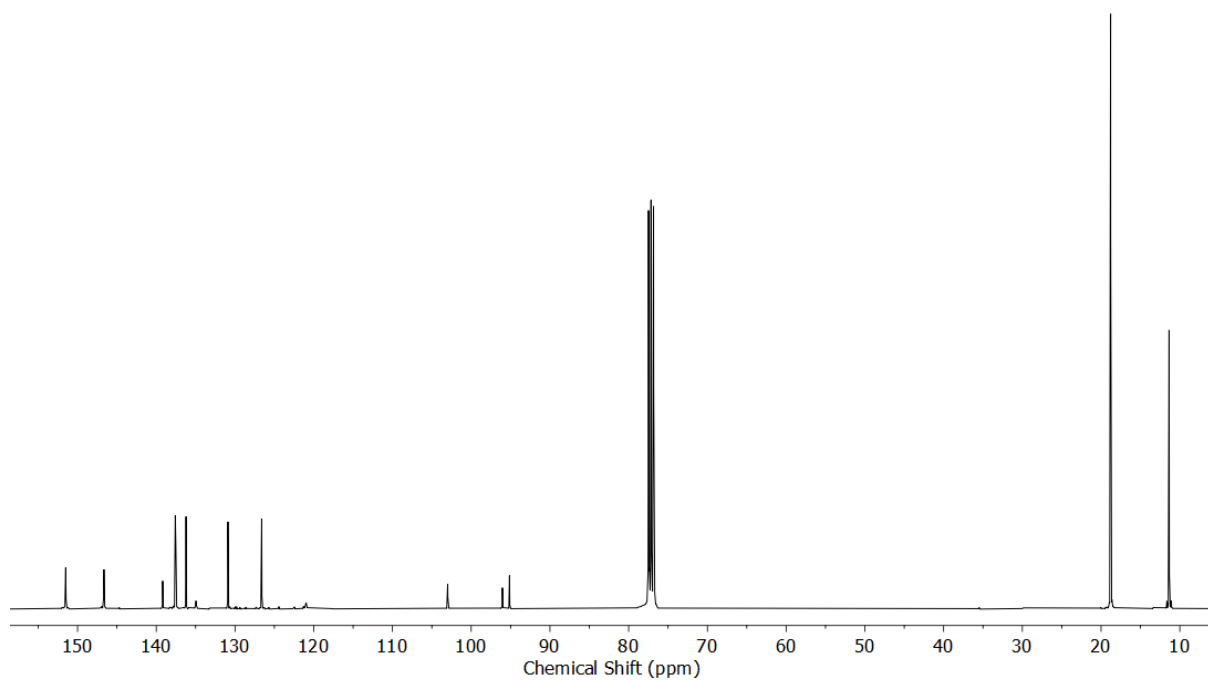

Figure S114  $^{13}\text{C}$  NMR (101 MHz,  $\text{CDCl}_3$ ) of **S12**.

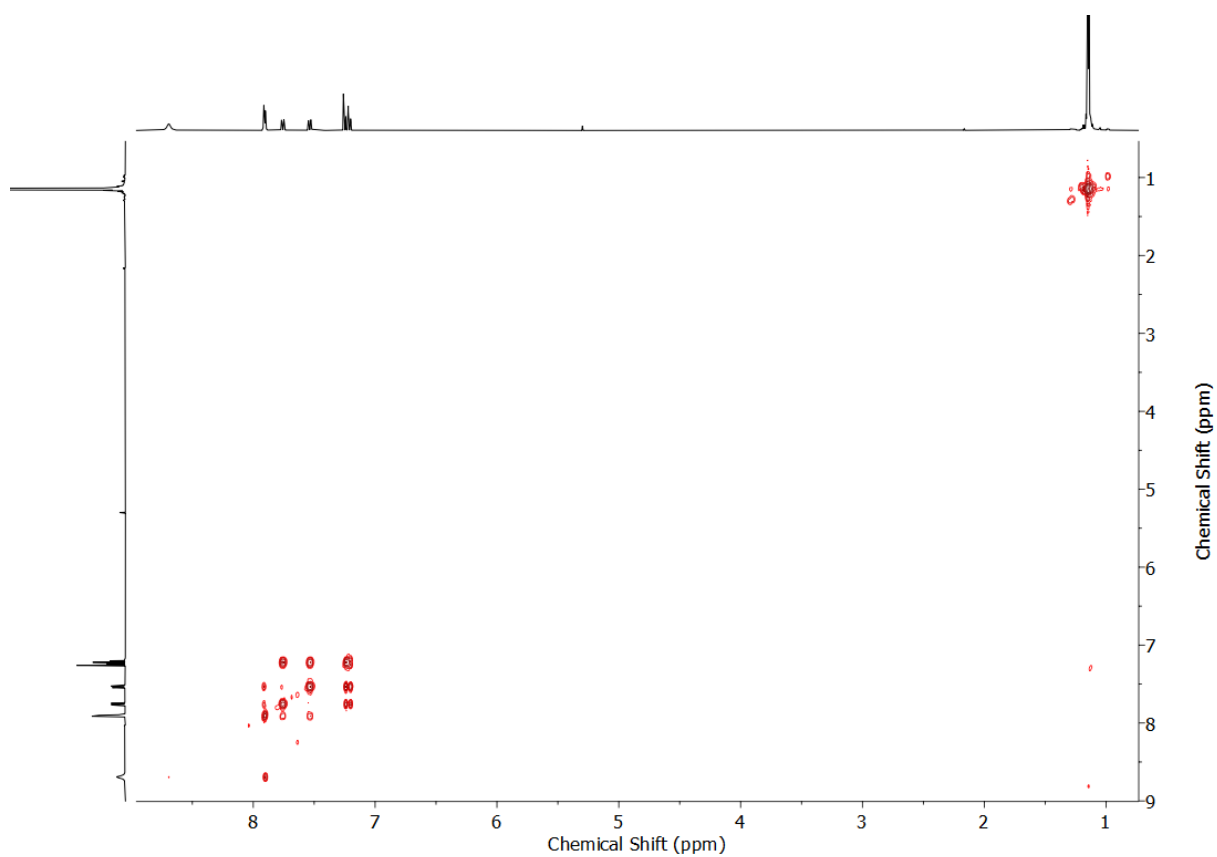

Figure S115 COSY NMR ( $\text{CDCl}_3$ ) of **S12**.

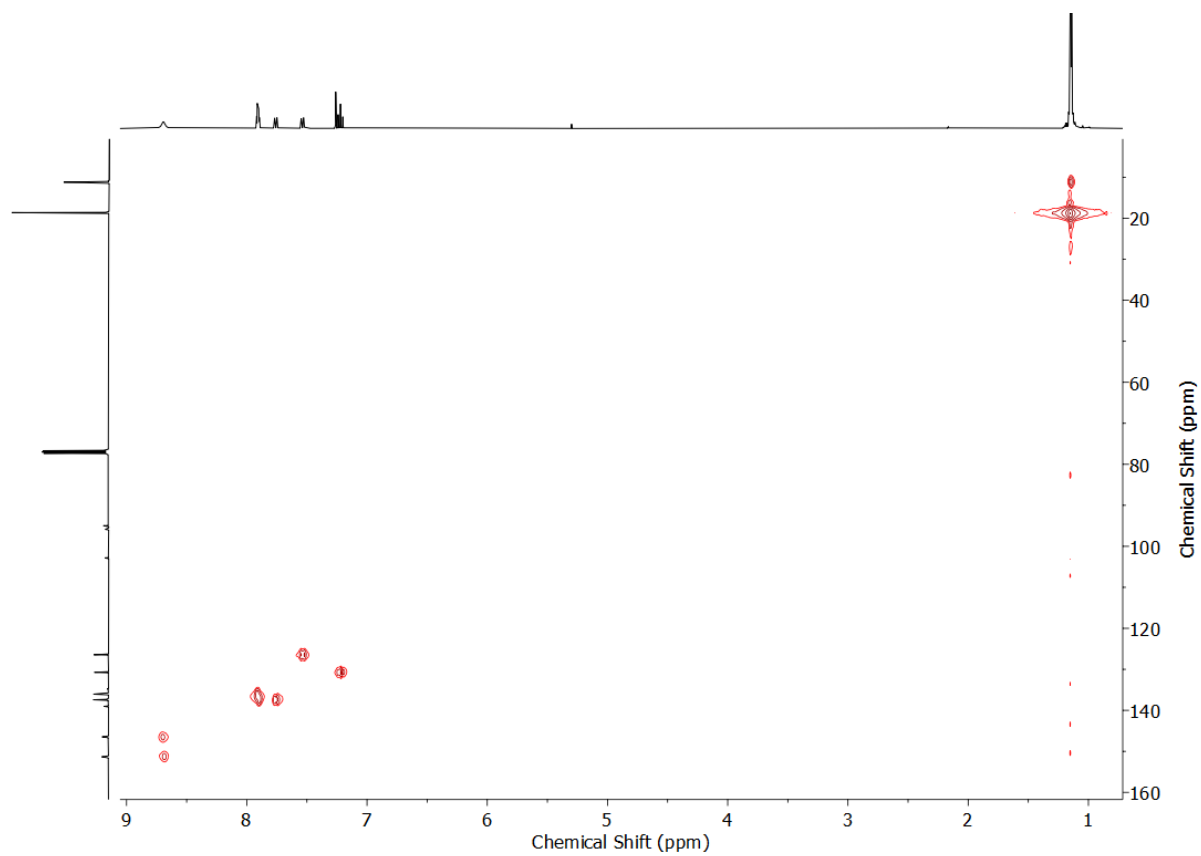

Figure S116 HSQC NMR (CDCl<sub>3</sub>) of **S12**.

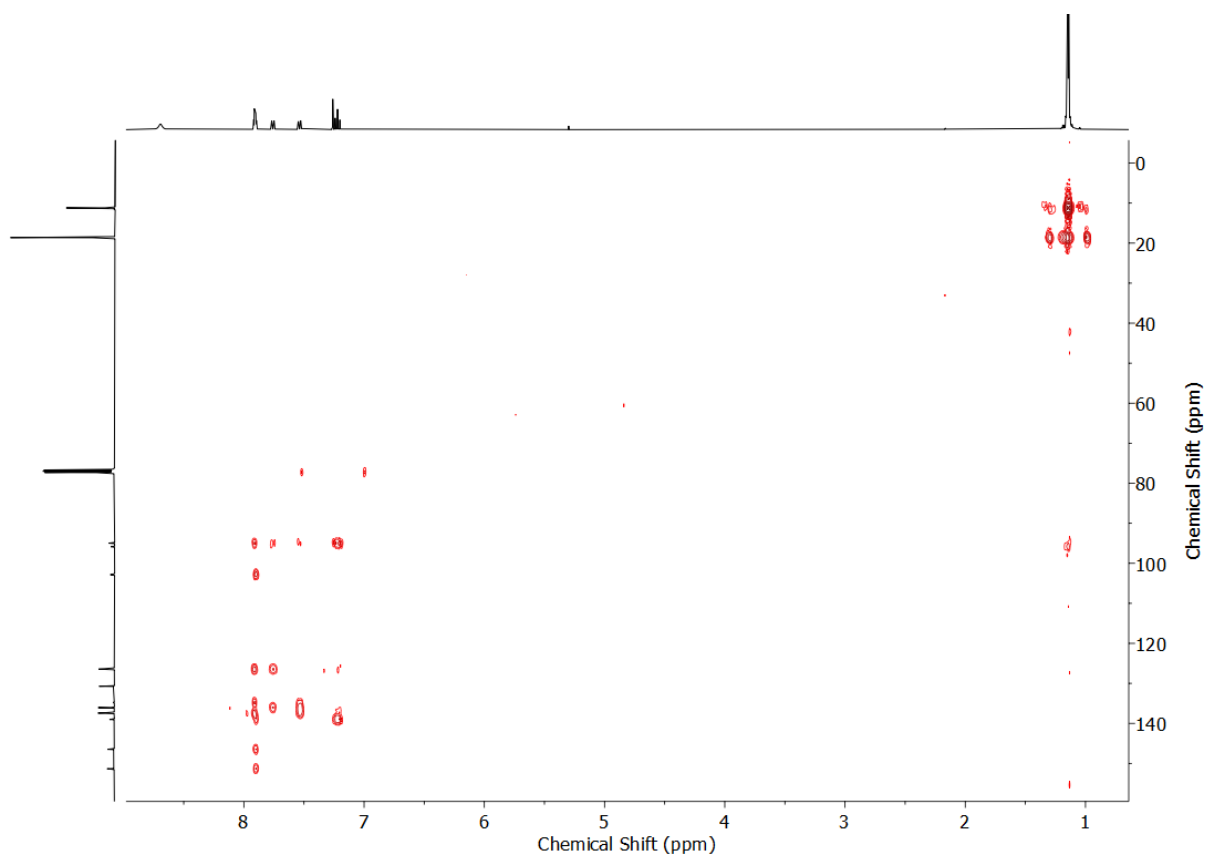

Figure S117 HMBC NMR (CDCl<sub>3</sub>) of **S12**.

## Synthesis of S13

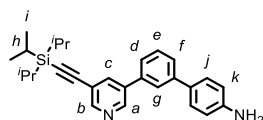

**S12** (1.35 g, 2.93 mmol, 1.0 eq.), 4-aminophenylboronic acid pinacol ester (0.802 g, 3.66 mmol, 1.25 eq.), Pd(PPh<sub>3</sub>)<sub>2</sub>Cl<sub>2</sub> (0.051 g, 0.073 mmol, 2.5 mol%) and K<sub>2</sub>CO<sub>3</sub> (1.01 g, 7.33 mmol, 2.5 eq.) in 2:1 1,4-dioxane/H<sub>2</sub> (9.0 mL) were stirred at 90 °C in a sealed vial for 22 h. H<sub>2</sub>O (50 mL) was added and the aqueous phase extracted with EtOAc (3 × 50 mL). The combined organic phases were dried (MgSO<sub>4</sub>) and the solvent removed *in vacuo*. Following purification by column chromatography (1<sup>st</sup> column 0→3% acetone in 1:1 CH<sub>2</sub>Cl<sub>2</sub>/pentane; 2<sup>nd</sup> column 0→10% EtOAc in 1:1 CH<sub>2</sub>Cl<sub>2</sub>/pentane) the product was obtained as an orange/brown oil that solidified on standing (1.06 g, 85%).

**<sup>1</sup>H NMR** (400 MHz, CD<sub>3</sub>OD) δ: 8.79 (d, *J* = 1.8 Hz, 1H, H<sub>a</sub>), 8.57 (d, *J* = 1.4 Hz, 1H, H<sub>b</sub>), 8.09 (t, *J* = 2.1 Hz, 1H, H<sub>c</sub>), 7.77 (m, 1H, H<sub>g</sub>), 7.60 (m, 1H, H<sub>f</sub>), 7.51-7.50 (m, 2H, H<sub>d</sub>, H<sub>e</sub>), 7.46 (d, *J* = 8.7 Hz, 2H, H<sub>j</sub>), 6.81 (d, *J* = 8.7 Hz, 2H, H<sub>k</sub>), 1.18 (app. s, 21H, H<sub>h</sub>, H<sub>i</sub>).

**<sup>13</sup>C NMR** (101 MHz, CD<sub>3</sub>OD) δ: 151.4 (C<sub>b</sub>), 148.9, 148.0 (C<sub>a</sub>), 143.9, 138.6 (C<sub>c</sub>), 138.1, 131.3, 130.7 (C<sub>d</sub>/C<sub>e</sub>), 128.8 (C<sub>j</sub>), 127.5 (C<sub>f</sub>), 125.9 (C<sub>d</sub>/C<sub>e</sub>/C<sub>g</sub>), 125.9 (C<sub>d</sub>/C<sub>e</sub>/C<sub>g</sub>), 122.1, 116.8 (C<sub>k</sub>), 104.4, 96.2, 19.1 (C<sub>i</sub>), 12.5 (C<sub>h</sub>) (one 4° signal missing).

**HR-APCI-MS** *m/z* = 427.2563 [M+H]<sup>+</sup> calc. 427.2564.

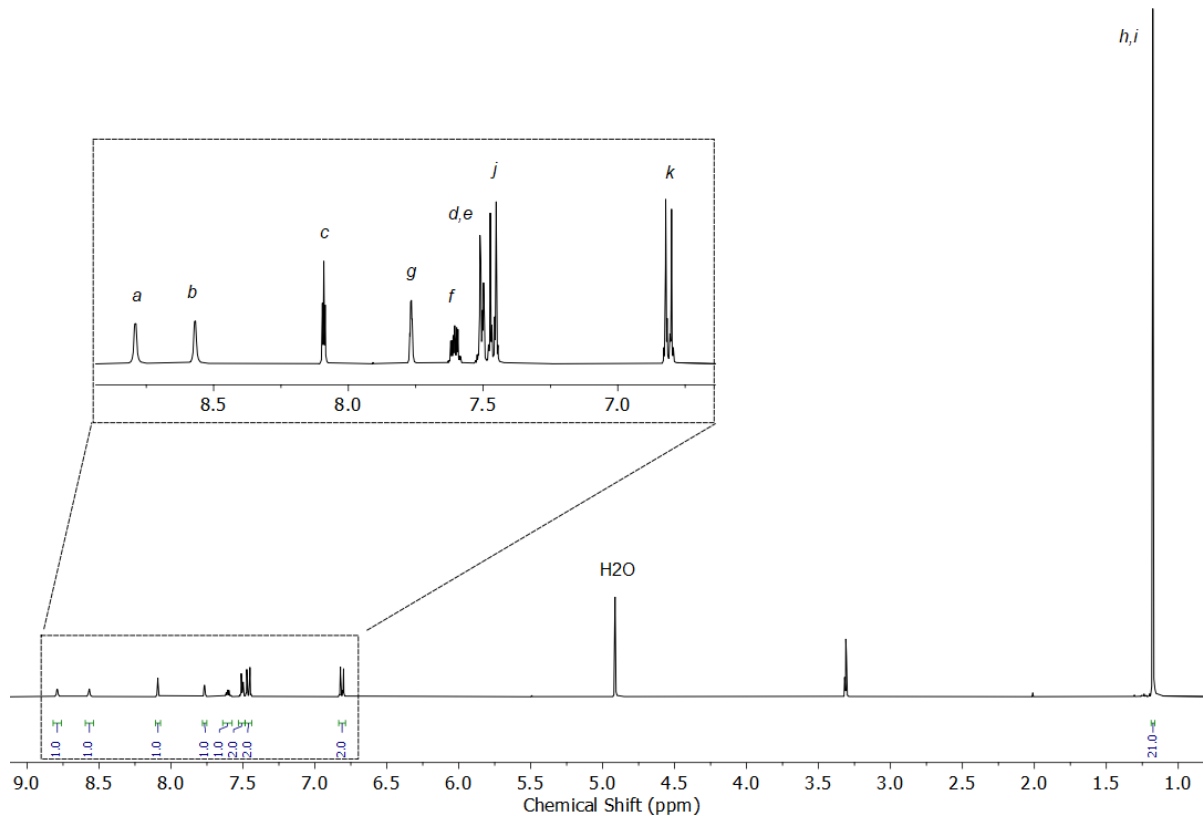

Figure S118 <sup>1</sup>H NMR (400 MHz, CD<sub>3</sub>OD) of **S13**.

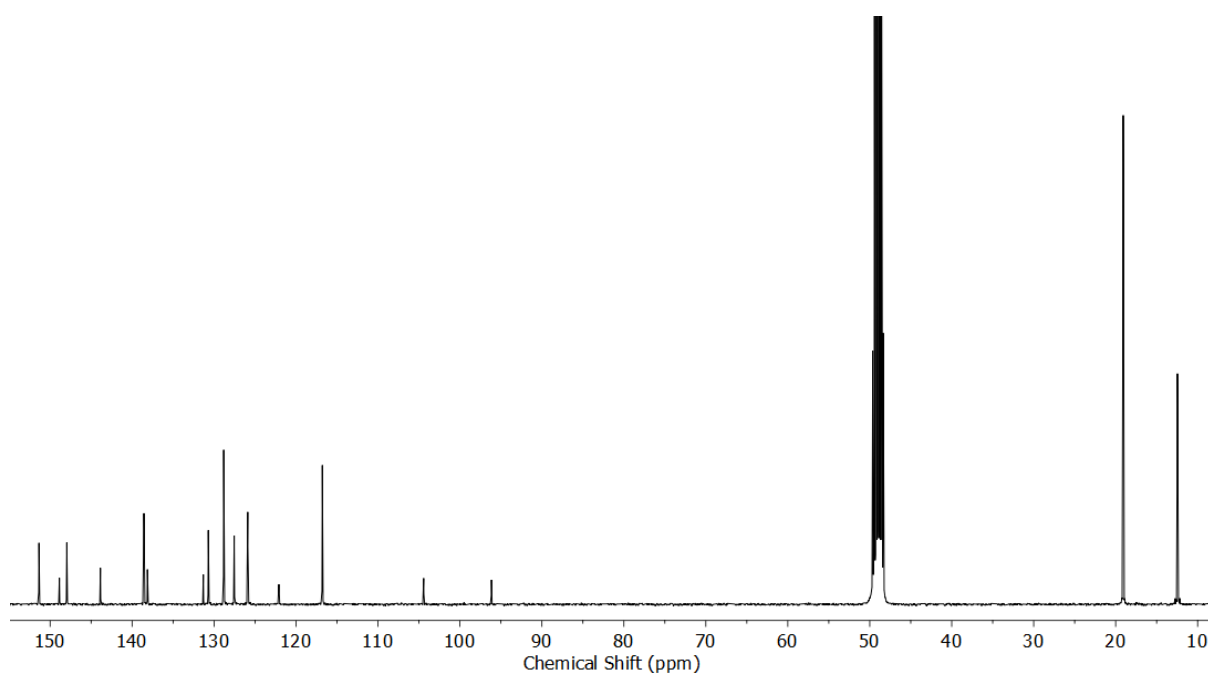

Figure S119  $^{13}\text{C}$  NMR (101 MHz,  $\text{CD}_3\text{OD}$ ) of **S13**.

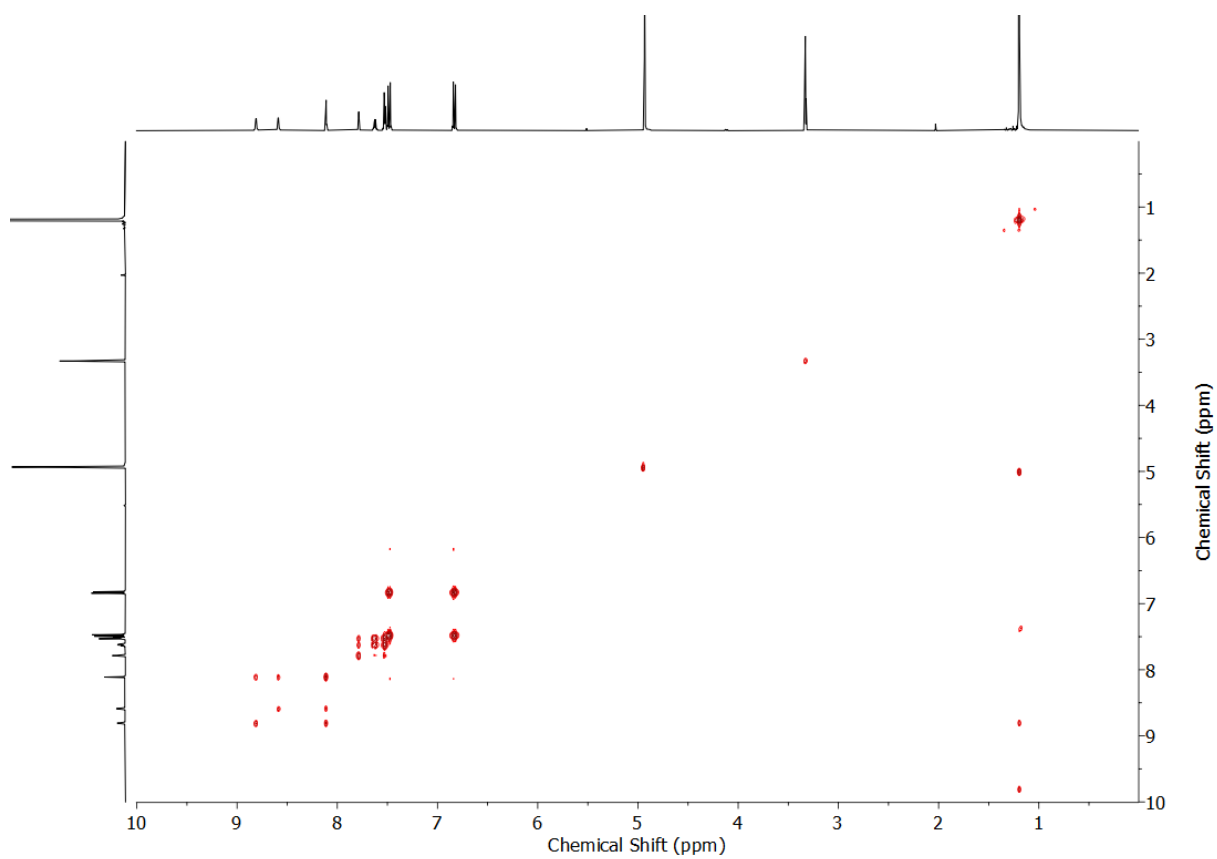

Figure S120 COSY NMR ( $\text{CD}_3\text{OD}$ ) of **S13**.

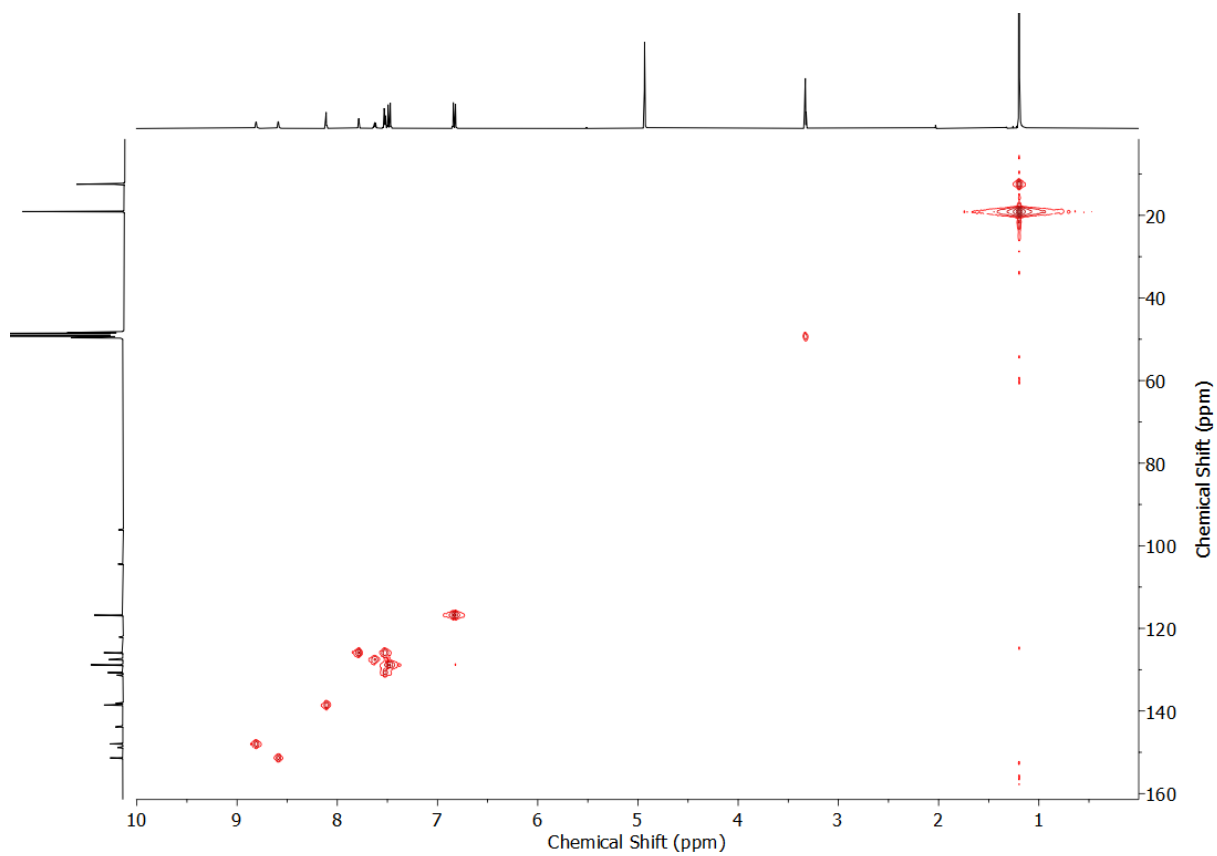

Figure S121 HSQC NMR (CD<sub>3</sub>OD) of **S13**.

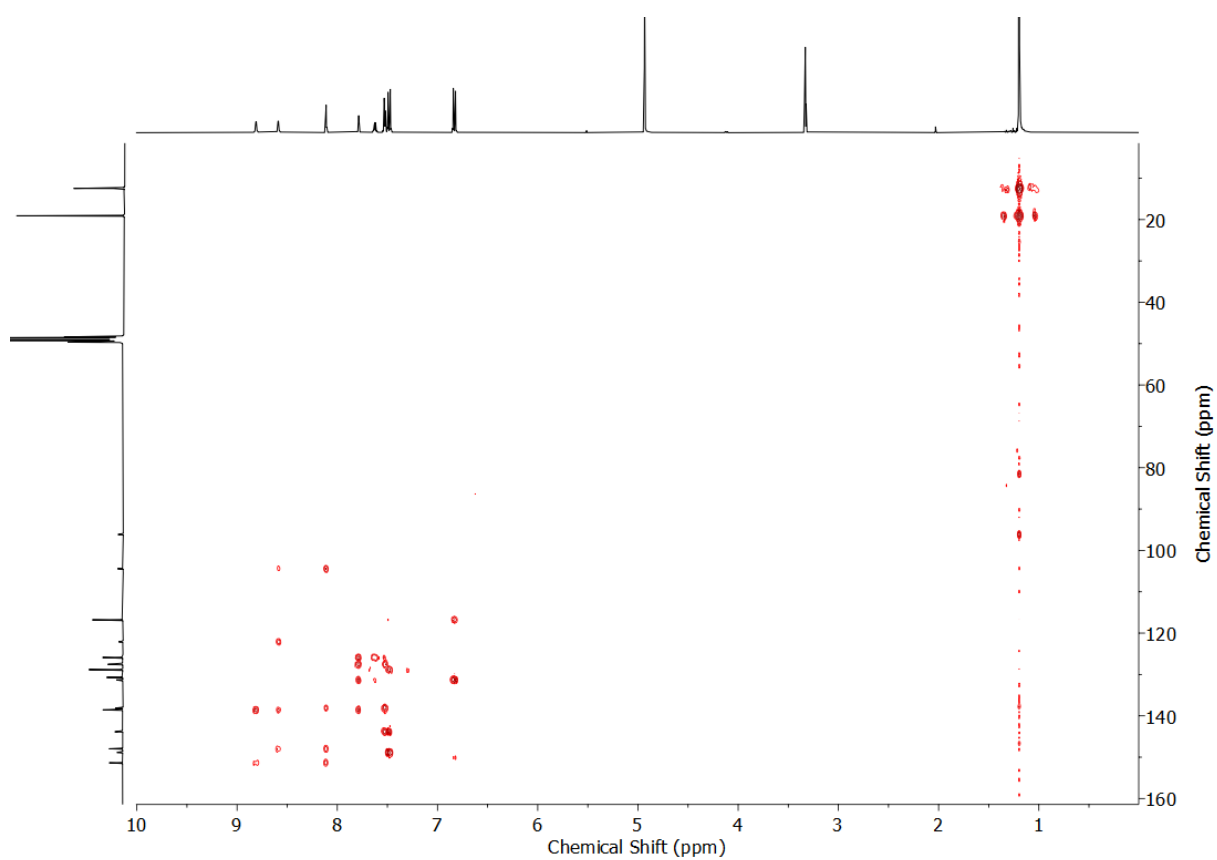

Figure S122 HMBC NMR (CD<sub>3</sub>OD) of **S13**.



## Synthesis of S14

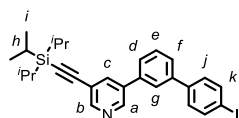

To a solution of **S13** (0.812 g, 1.90 mmol, 1.0 eq) in CH<sub>3</sub>CN (19 mL) was added TsOH·H<sub>2</sub>O (1.09 g, 5.71 mmol, 3.0 eq.). The resultant suspension was cooled to 0 °C and NaNO<sub>2</sub> (0.263 g, 3.81 mmol, 2.0 eq) and KI (0.790 g, 4.76 mmol, 2.5 eq.) in H<sub>2</sub>O (2 mL) was added dropwise. The reaction mixture was allowed to warm to rt and stirred for 19 h. H<sub>2</sub>O (50 mL), sat. aq. NaHCO<sub>3</sub> (50 mL) and 0.5 M Na<sub>2</sub>S<sub>2</sub>O<sub>3</sub> (50 mL) were added and the aqueous phase extracted with EtOAc (3 × 50 mL). The combined organic phases were dried (MgSO<sub>4</sub>) and the solvent removed *in vacuo*. After purification by column chromatography on silica gel (1:1 CH<sub>2</sub>Cl<sub>2</sub>/pentane) the product was obtained as a light yellow oil (0.755 g, 74%).

<sup>1</sup>H NMR (400 MHz, CDCl<sub>3</sub>) δ: 8.80-8.72 (br. m, 2H, H<sub>a</sub>, H<sub>b</sub>), 7.99 (s, H<sub>c</sub>), 7.81 (d, *J* = 8.6 Hz, 2H, H<sub>j</sub>), 7.71 (m, 1H, H<sub>g</sub>), 7.62-7.55 (m, 3H, H<sub>d</sub>, H<sub>e</sub>, H<sub>f</sub>), 7.38 (d, *J* = 8.6 Hz, H<sub>k</sub>), 1.16-1.15 (m, 21H, H<sub>h</sub>, H<sub>i</sub>).

<sup>13</sup>C NMR (101 MHz, CDCl<sub>3</sub>) δ: 151.0 (C<sub>a</sub>/C<sub>b</sub>), 146.6 (C<sub>a</sub>/C<sub>b</sub>), 141.3, 140.2, 138.2 (C<sub>j</sub>), 137.8, 137.8, 129.9 (C<sub>d</sub>/C<sub>e</sub>/C<sub>f</sub>), 129.2 (C<sub>k</sub>), 127.2 (C<sub>d</sub>/C<sub>e</sub>/C<sub>f</sub>), 126.7 (C<sub>d</sub>/C<sub>e</sub>/C<sub>f</sub>), 126.0 (C<sub>g</sub>), 103.1, 96.0, 93.7, 18.8 (C<sub>i</sub>), 11.4 (C<sub>h</sub>) (2 × 4° signals missing).

HR-APCI-MS *m/z* = 538.1412 [M+H]<sup>+</sup> calc. 538.1421.

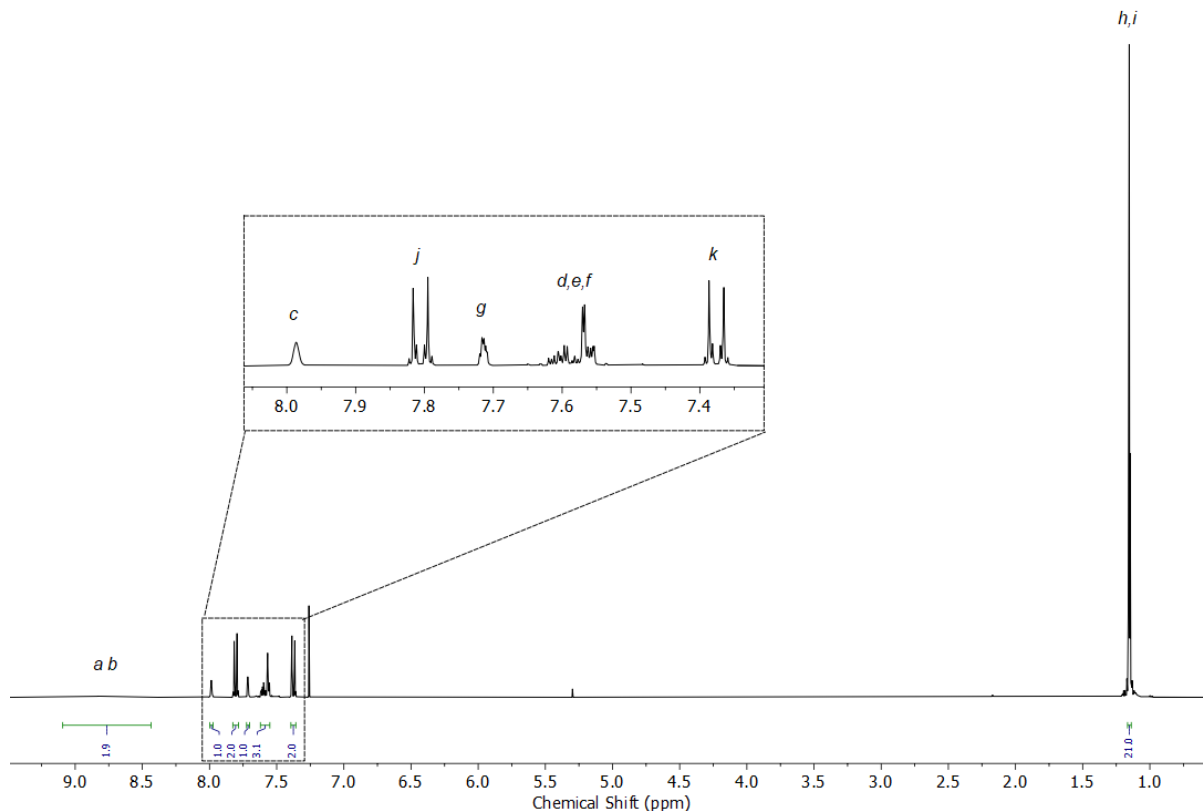

Figure S123 <sup>1</sup>H NMR (400 MHz, CDCl<sub>3</sub>) of **S14**.

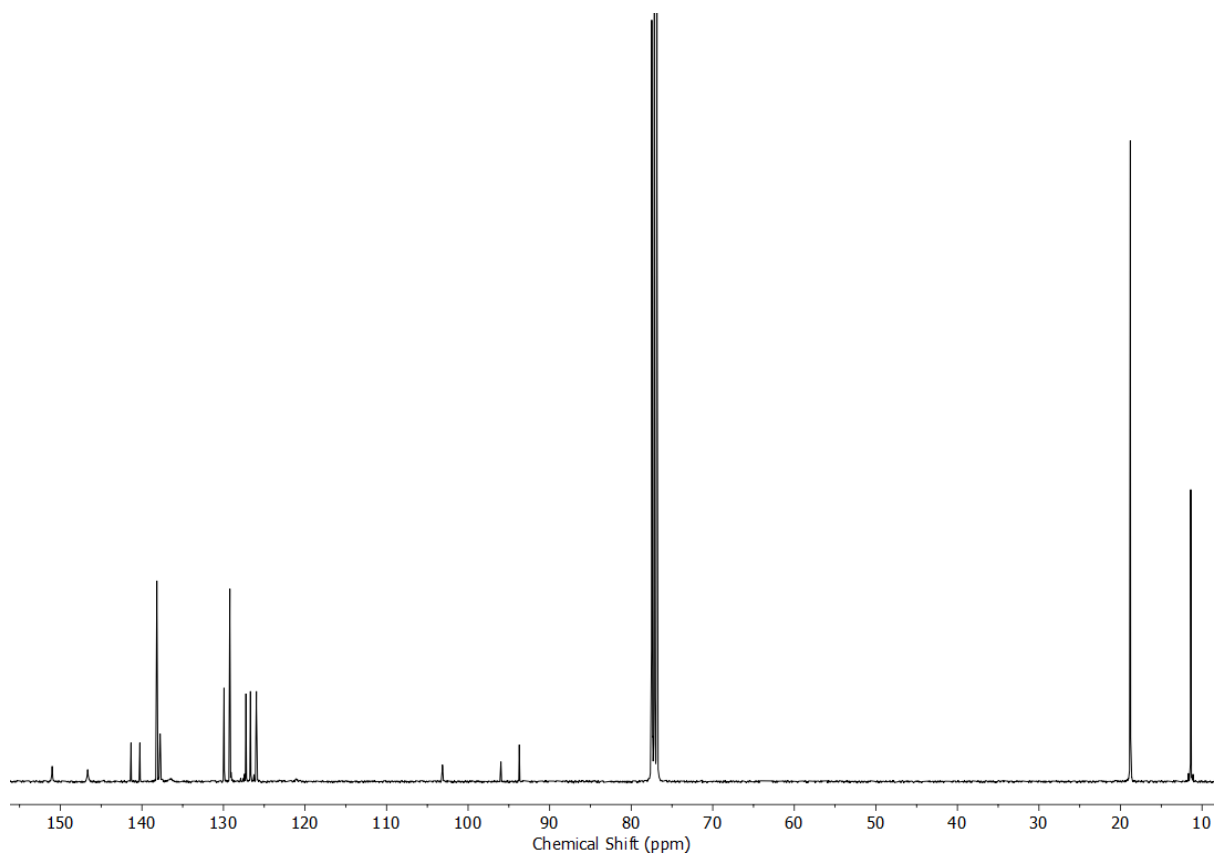

Figure S124  $^{13}\text{C}$  NMR (101 MHz,  $\text{CDCl}_3$ ) of **S14**.

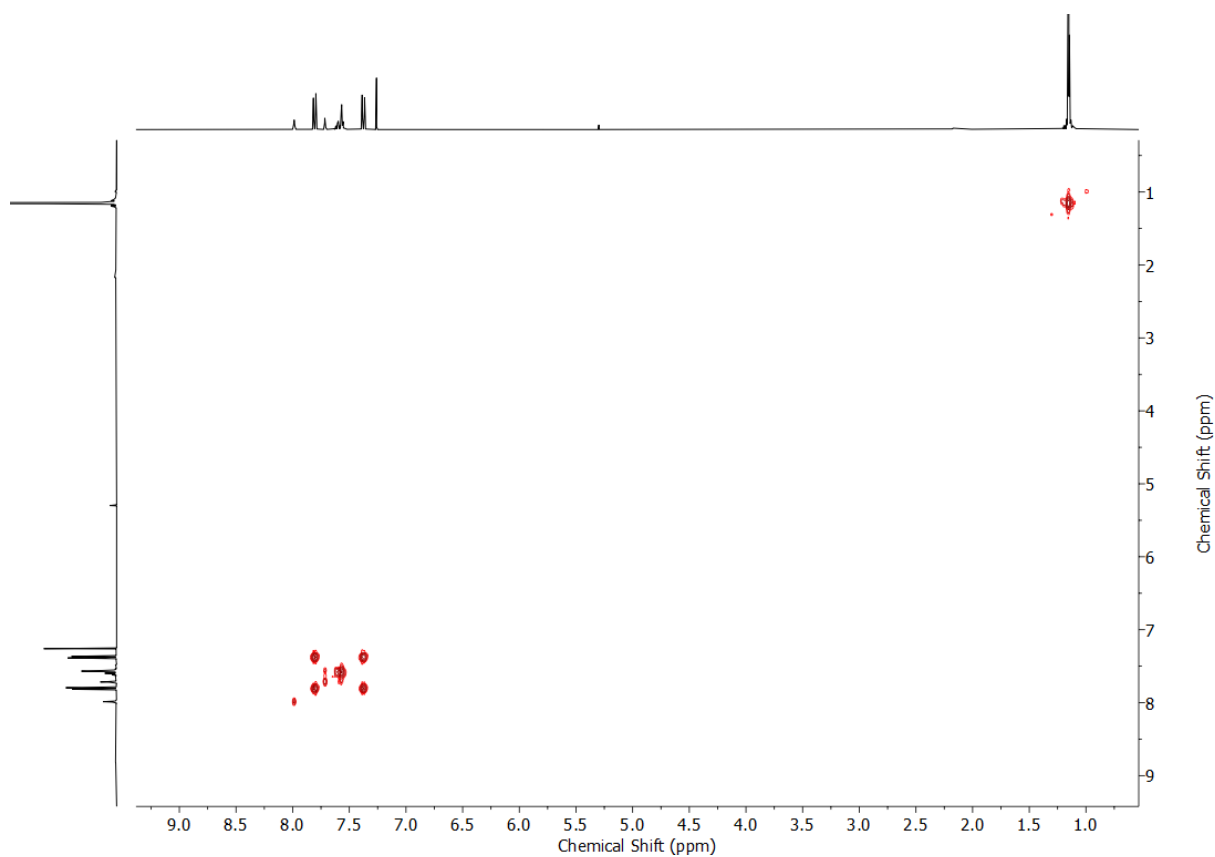

Figure S125 COSY NMR ( $\text{CDCl}_3$ ) of **S14**.

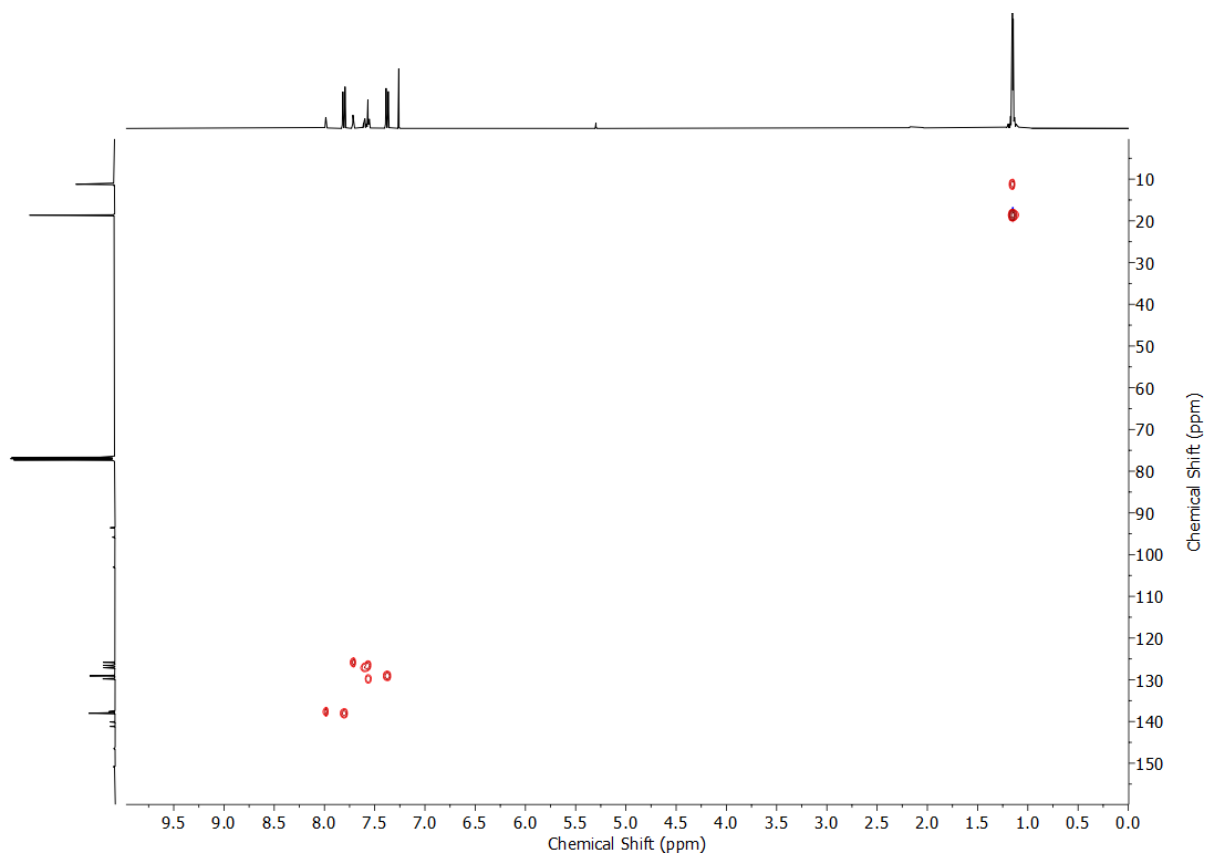

Figure S126 HSQC NMR (CDCl<sub>3</sub>) of **S14**.

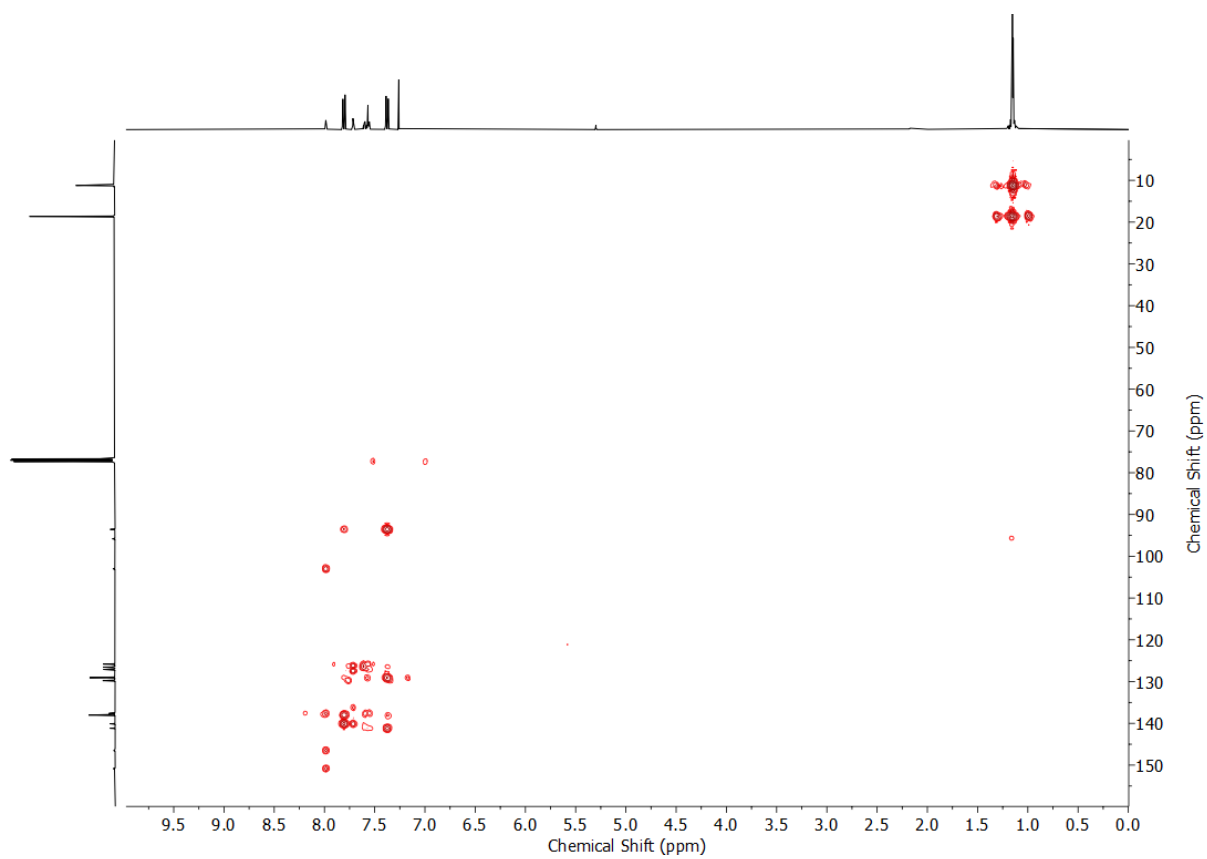

Figure S127 HMBC NMR (CDCl<sub>3</sub>) of **S14**.

## Synthesis of L1<sup>TIPS</sup>

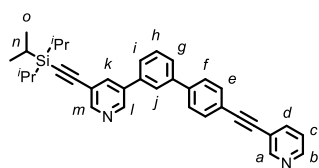

**S14** (0.403 g, 0.75 mmol, 1.0 eq.), 3-ethynylpyridine (0.085 g, 0.83 mmol, 1.1 eq.), Pd(PPh<sub>3</sub>)<sub>4</sub> (0.022 g, 0.019 mmol, 2.5 mol%) and CuI (0.0036 g, 0.019 mmol, 2.5 mol%) in 1:1 1,4-dioxane/*i*Pr<sub>2</sub>NH (7.5 mL) were stirred at rt for 22 h. EDTA solution (50 mL) was added and the aqueous phase extracted with CH<sub>2</sub>Cl<sub>2</sub> (3 × 25 mL). The combined organic phases were dried (MgSO<sub>4</sub>) and the solvent removed *in vacuo*. After purification by column chromatography on silica gel (pentane with step gradient 0 to 20% EtOAc in 5% increments) the product was obtained as an off-white solid (0.343 g, 89%).

**<sup>1</sup>H NMR** (400 MHz, CDCl<sub>3</sub>) δ: 8.80 (app. s, 2H, H<sub>a</sub>, H<sub>l</sub>), 8.70 (s, 1H, H<sub>m</sub>), 8.57 (d, *J* = 4.8 Hz, 1H, H<sub>b</sub>), 8.00 (br. s, 1H, H<sub>k</sub>), 7.88 (m, 1H, H<sub>d</sub>), 7.78 (s, 1H, H<sub>j</sub>), 7.66 (app. s, 5H, H<sub>e</sub>, H<sub>f</sub>, H<sub>h</sub>), 7.58 (app. d, *J* = 4.4 Hz, 2H, H<sub>g</sub>, H<sub>i</sub>), 7.34 (dd, *J* = 7.9, 5.0 Hz, 1H, H<sub>c</sub>), 1.16 (app. s, 21 H, H<sub>n</sub>, H<sub>o</sub>).

**<sup>13</sup>C NMR** (101 MHz, CDCl<sub>3</sub>) δ: 151.9 (C<sub>a</sub>), 151.2 (C<sub>m</sub>), 148.2 (C<sub>b</sub>), 146.9 (C<sub>l</sub>), 141.4, 141.1, 139.1 (C<sub>d</sub>), 137.8, 137.7 (C<sub>k</sub>), 136.3, 132.4 (C<sub>e</sub>/C<sub>f</sub>), 129.9 (C<sub>g</sub>/C<sub>i</sub>), 127.4 (C<sub>e</sub>/C<sub>f</sub>), 127.4, 126.8 (C<sub>g</sub>/C<sub>i</sub>), 126.1 (C<sub>j</sub>), 123.4 (C<sub>c</sub>), 121.9, 120.9, 120.8, 103.2, 95.8, 92.9, 86.8, 18.8 (C<sub>o</sub>), 11.4 (C<sub>n</sub>).

**HR-APCI-MS** *m/z* = 513.2722 [M+H]<sup>+</sup> calc. 513.2721.

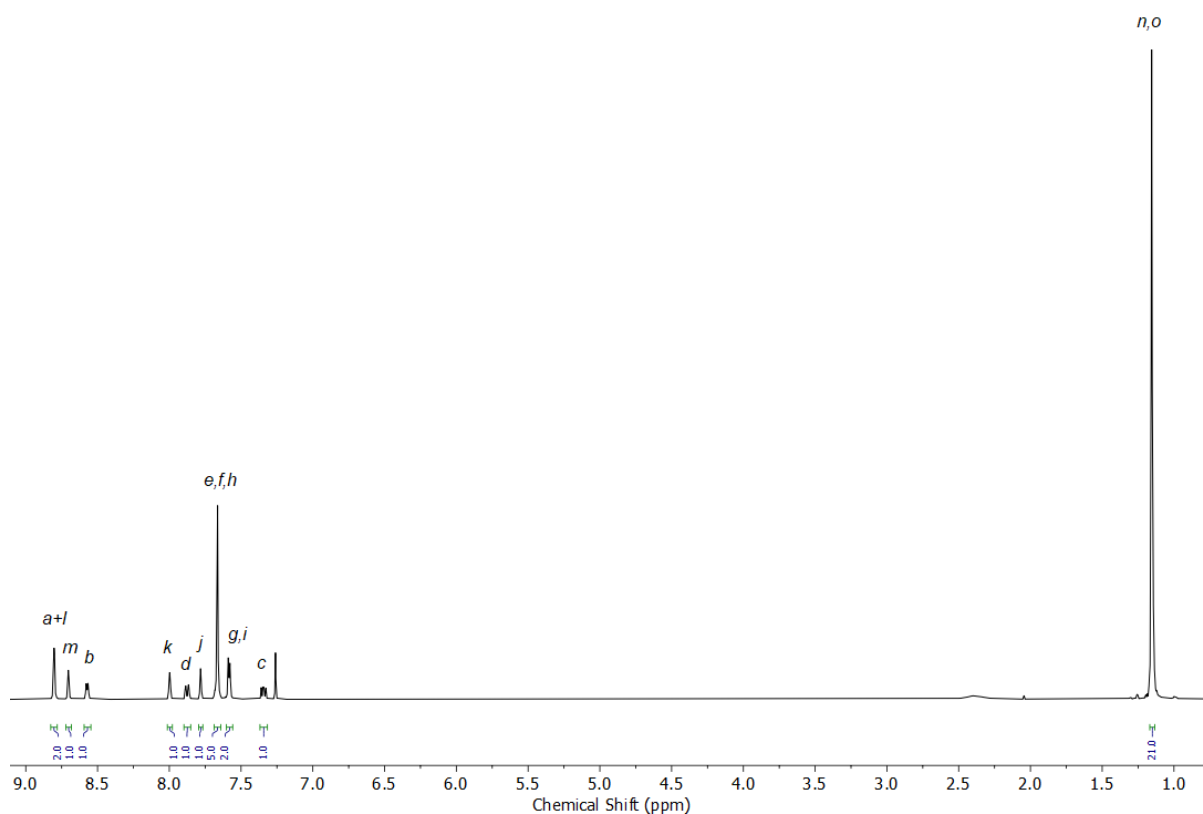

Figure S128 <sup>1</sup>H NMR (400 MHz, CDCl<sub>3</sub>) of L1<sup>TIPS</sup>.

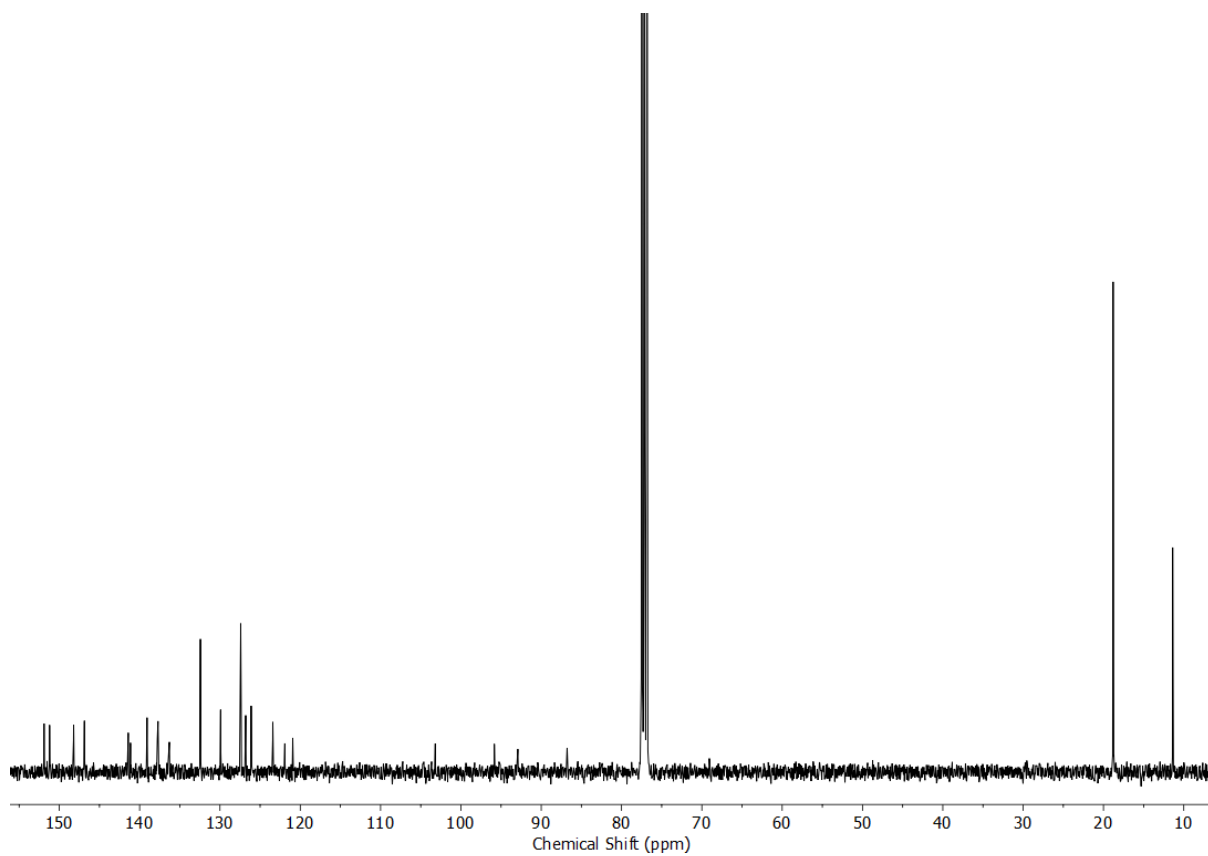

Figure S129  $^{13}\text{C}$  NMR (101 MHz,  $\text{CDCl}_3$ ) of **L1**<sup>TIPS</sup>.

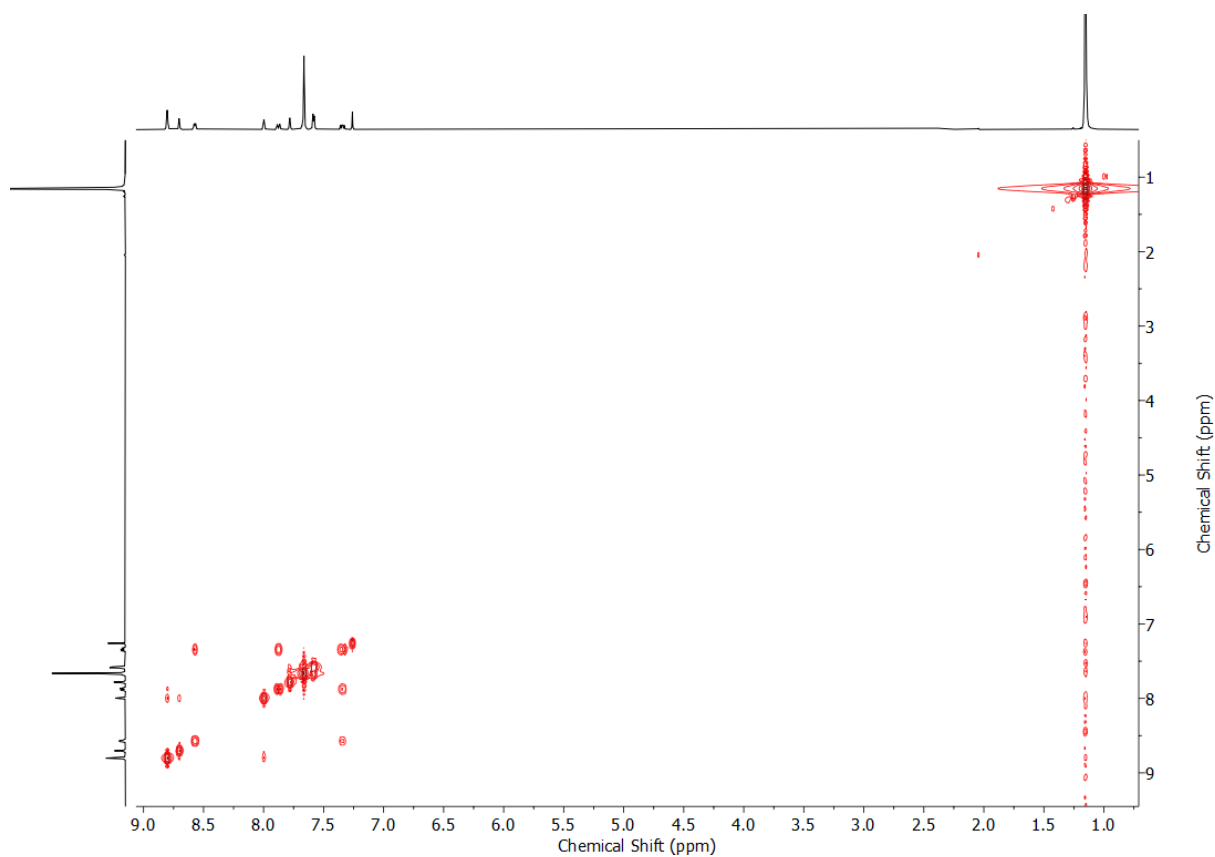

Figure S130 COSY NMR ( $\text{CDCl}_3$ ) of **L1**<sup>TIPS</sup>.

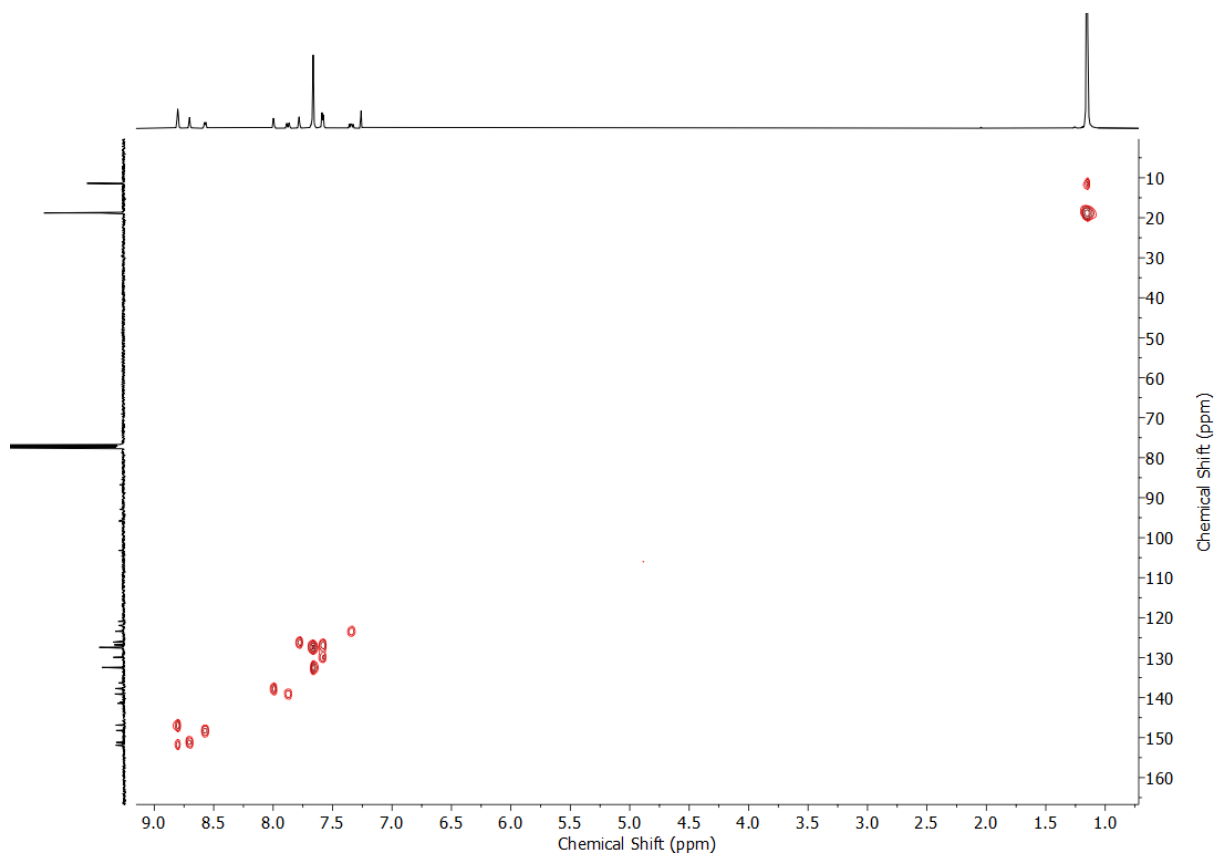

Figure S131 HSQC NMR (CDCl<sub>3</sub>) of L1TIPS.

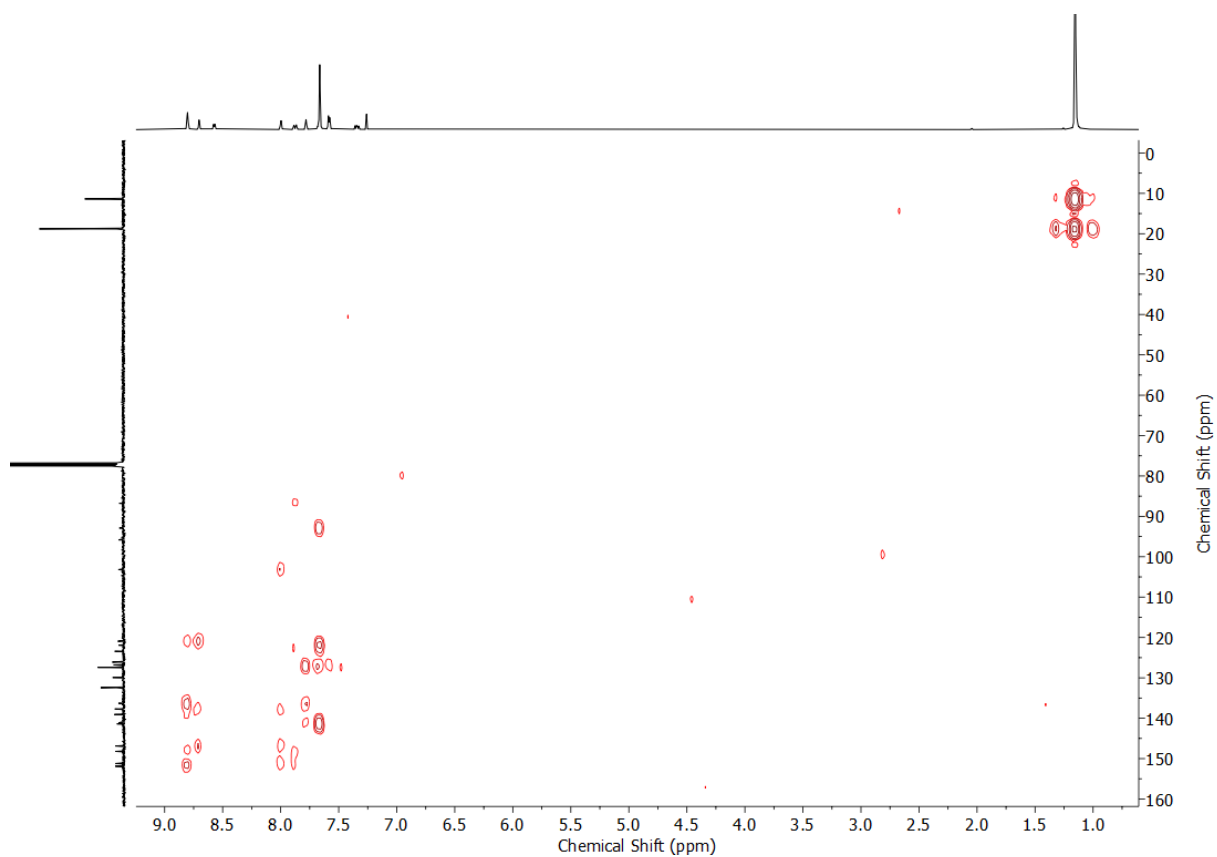

Figure S132 HMBC NMR (CDCl<sub>3</sub>) of L1TIPS.

## Synthesis of L1<sup>CCH</sup>

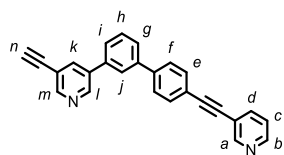

To a solution of L1<sup>TIPS</sup> (0.256 g, 0.5 mmol, 1 eq.) in THF (5 mL) was added 1M TBAF in THF (1.0 mL, 1.0 mmol, 2 eq.). After stirring at rt for 2 h, sat. aq. NH<sub>4</sub>Cl (20 mL) was added and the aqueous phase extracted with CH<sub>2</sub>Cl<sub>2</sub> (3 × 20 mL). The combined organic phases were dried (MgSO<sub>4</sub>) and the solvent removed *in vacuo*. After purification by column chromatography (1:9 acetone/CH<sub>2</sub>Cl<sub>2</sub>) the product was obtained as a white solid (0.175 g, 98%).

<sup>1</sup>H NMR (400 MHz, CDCl<sub>3</sub>) δ: 8.85 (s, 1H, H<sub>l</sub>), 8.80 (s, 1H, H<sub>a</sub>), 8.72 (s, 1H, H<sub>m</sub>), 8.56 (d, *J* = 4.0 Hz, 1H, H<sub>b</sub>), 8.03 (s, 1H, H<sub>k</sub>), 7.84 (d, *J* = 7.8 Hz, 1H, H<sub>d</sub>), 7.78 (s, 1H, H<sub>j</sub>), 7.68-7.64 (m, 5H, H<sub>e</sub>, H<sub>f</sub>, 1 of H<sub>g</sub>/H<sub>h</sub>/H<sub>i</sub>), 7.58-7.57 (m, 2H, 2 of H<sub>g</sub>/H<sub>h</sub>/H<sub>i</sub>), 7.30 (dd, *J* = 7.8, 5.0 Hz, 1H, H<sub>c</sub>), 3.27 (s, 1H, H<sub>n</sub>).

<sup>13</sup>C NMR (101 MHz, CDCl<sub>3</sub>) δ: 152.4 (C<sub>a</sub>), 151.6 (C<sub>m</sub>), 148.8 (C<sub>b</sub>), 147.9 (C<sub>i</sub>), 141.4, 141.0, 138.6 (C<sub>d</sub>), 137.7, 137.6 (C<sub>k</sub>), 136.1, 132.4 (C<sub>e</sub>/C<sub>f</sub>), 129.9 (C<sub>g</sub>/C<sub>h</sub>/C<sub>i</sub>), 127.4 (× 2, 1 of C<sub>e</sub>/C<sub>f</sub>, 1 of C<sub>g</sub>/C<sub>h</sub>/C<sub>i</sub>), 126.7 (C<sub>g</sub>/C<sub>h</sub>/C<sub>i</sub>), 126.1 (C<sub>j</sub>), 123.2 (C<sub>c</sub>), 122.0, 120.6, 119.4, 92.5, 87.0, 81.1 (C<sub>n</sub>), 80.4.

HR-ESI-MS *m/z* = 357.1381 [M+H]<sup>+</sup> calc. 357.1392.

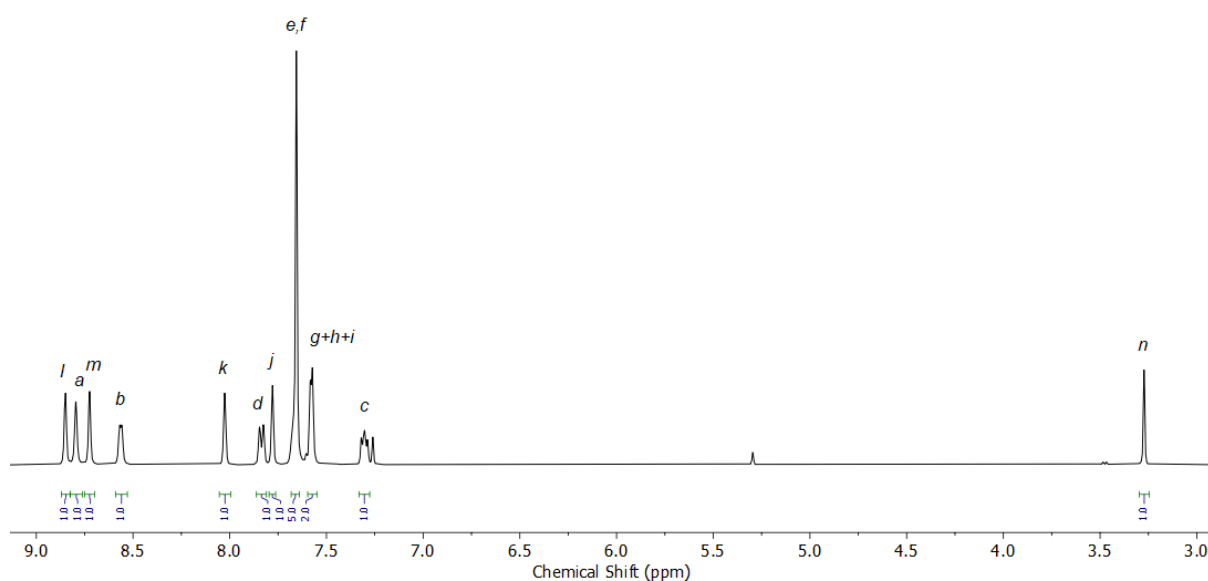

Figure S133 <sup>1</sup>H NMR (400 MHz, CDCl<sub>3</sub>) of L1<sup>CCH</sup>.

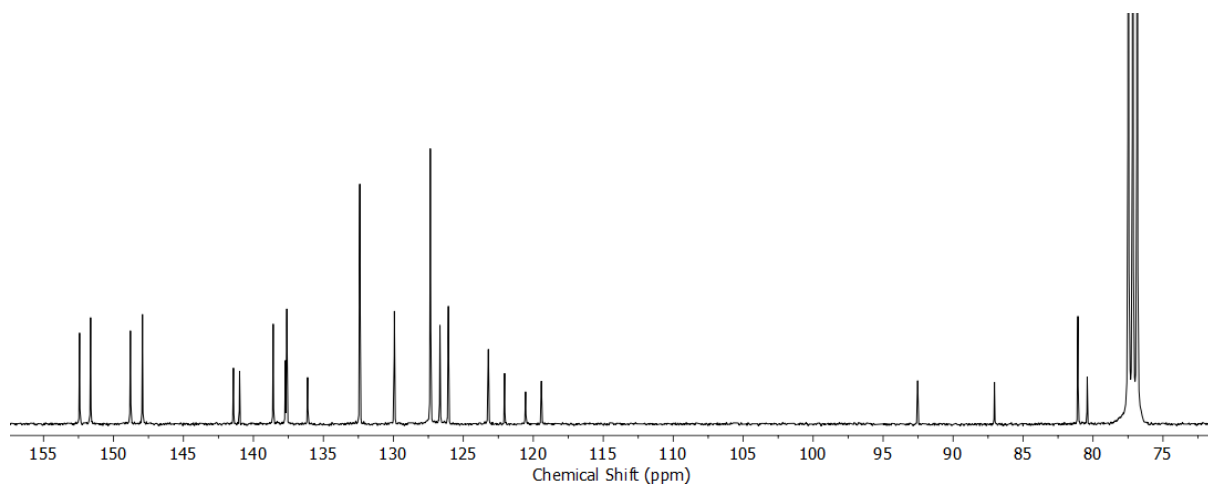

Figure S134  $^{13}\text{C}$  NMR (101 MHz,  $\text{CDCl}_3$ ) of  $\text{L1}^{\text{CCH}}$ .

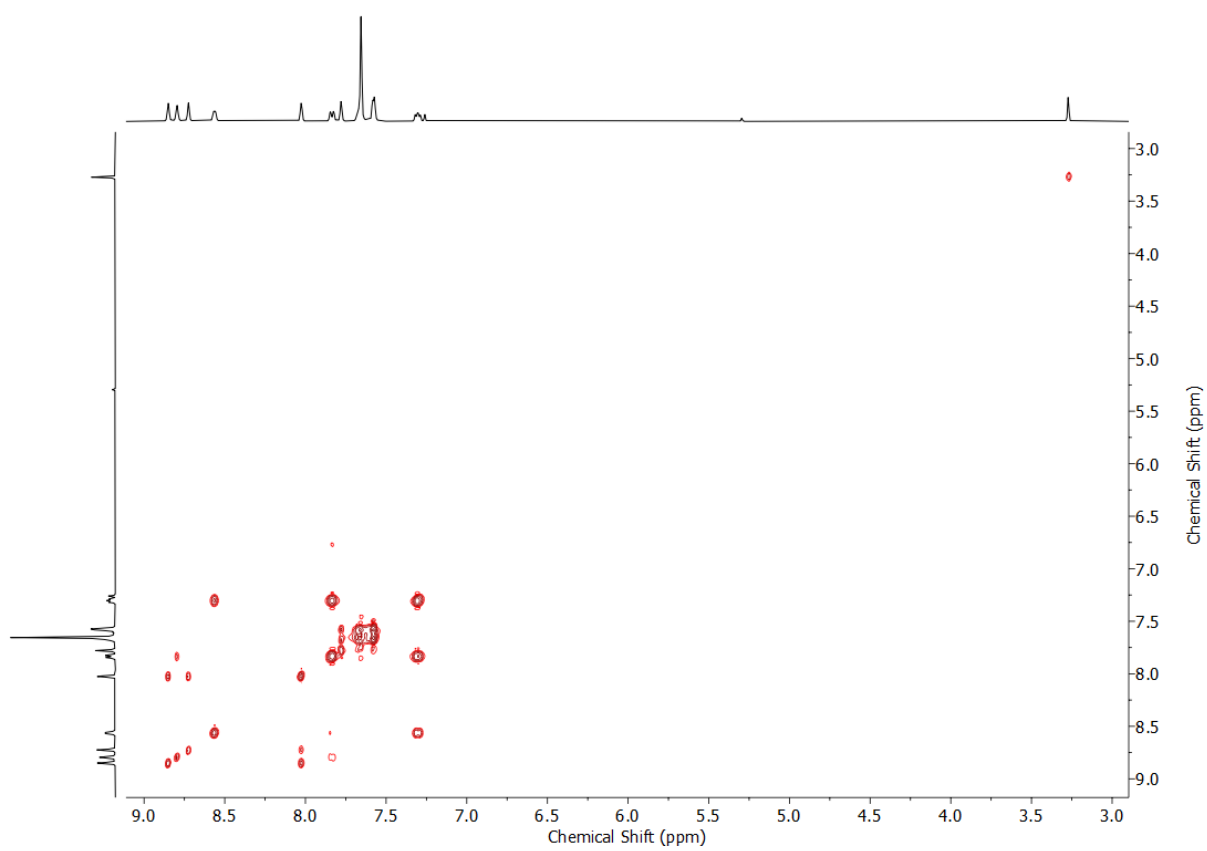

Figure S135 COSY NMR ( $\text{CDCl}_3$ ) of  $\text{L1}^{\text{CCH}}$ .



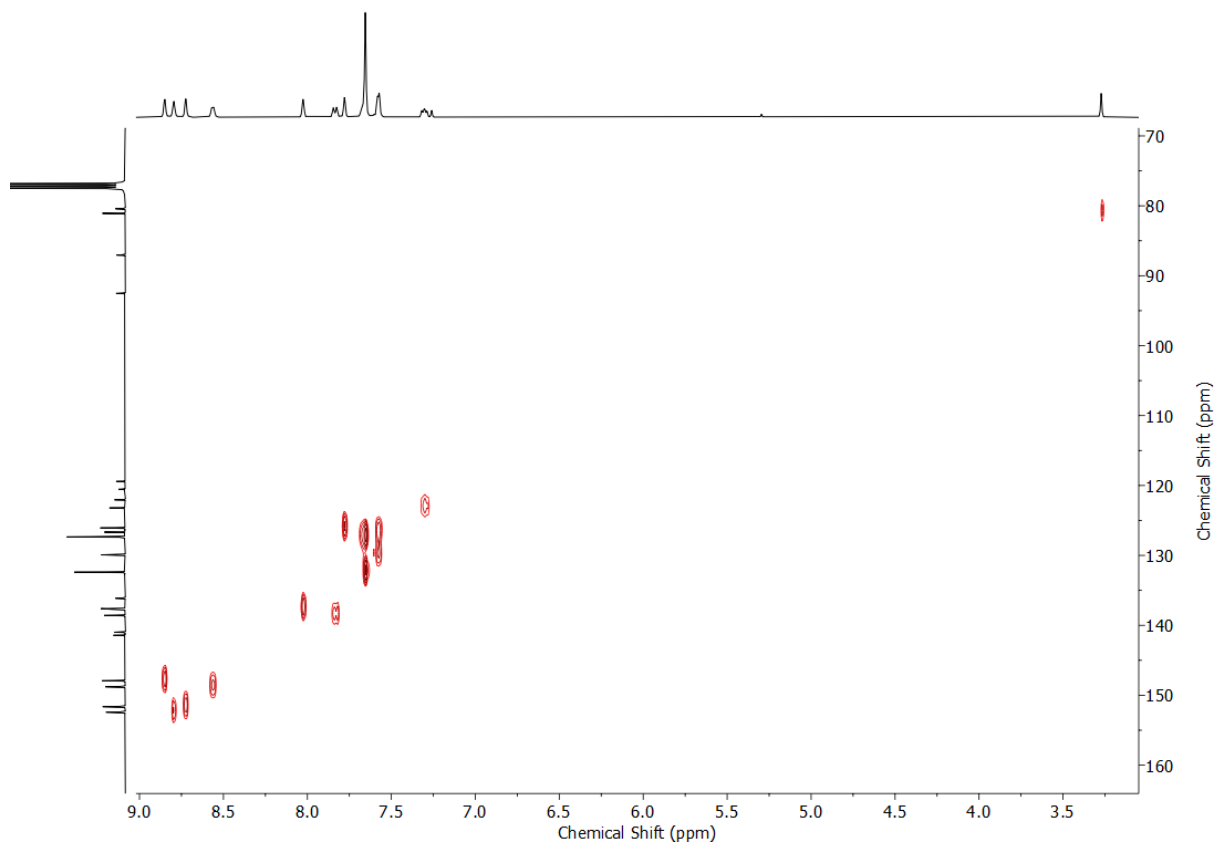

Figure S136 HSQC NMR (CDCl<sub>3</sub>) of L1<sup>CCH</sup>.

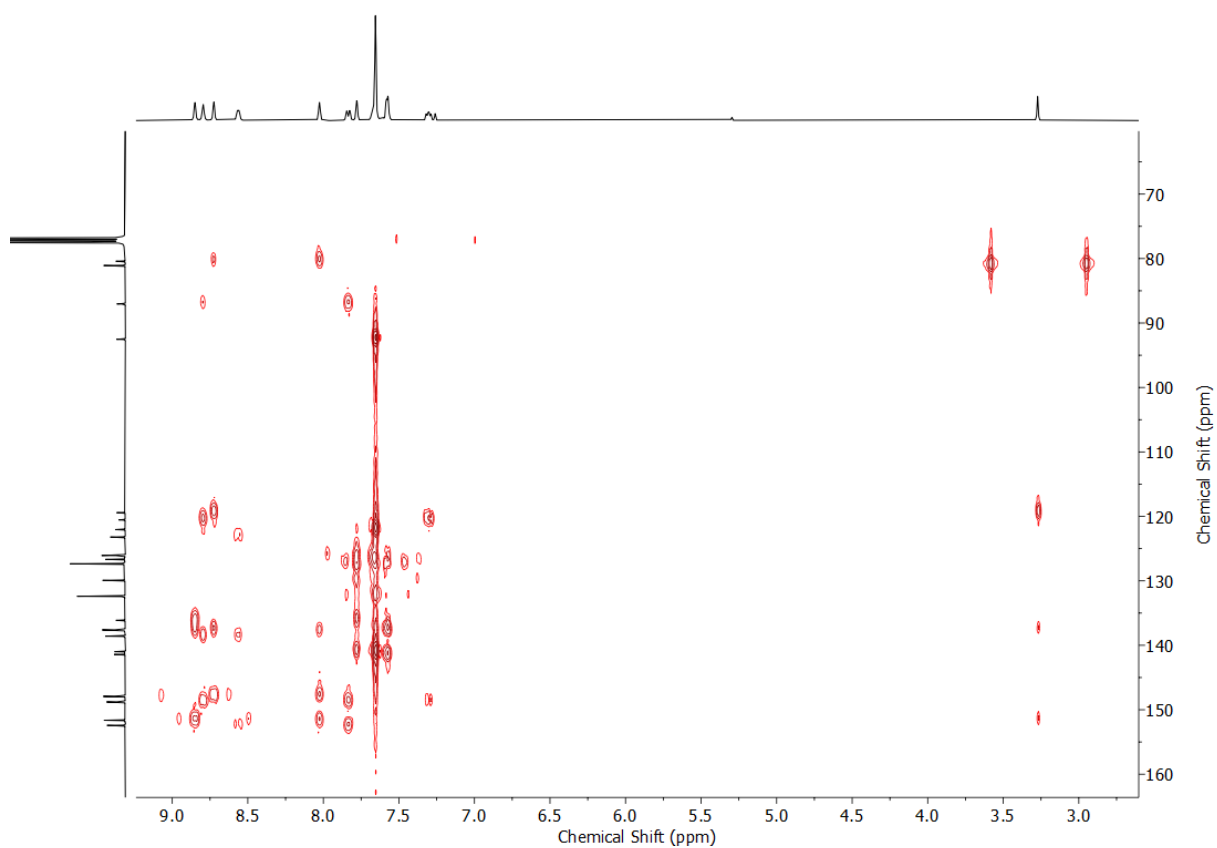

Figure S137 HMBC NMR (CDCl<sub>3</sub>) of L1<sup>CCH</sup>.

## Synthesis of L2<sup>Ph</sup>

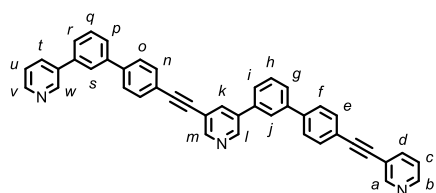

**L1<sup>CCH</sup>** (0.0535 g, 0.15 mmol, 1 eq.), **S9** (0.0534 g, 0.15 mmol, 1 eq.), Pd(PPh<sub>3</sub>)<sub>4</sub> (0.0087 g, 0.0075 mmol, 5 mol%) and CuI (0.0014 g, 0.0075 mmol, 5 mol%) were stirred at rt in 1:1 dioxane/*i*Pr<sub>2</sub>NH (2 mL) for 19 h, with additional dioxane (1 mL) added after 2 h. EDTA solution (20 mL) was added and the aqueous phase extracted with CH<sub>2</sub>Cl<sub>2</sub> (3 × 10 mL). The combined organic phases were dried (MgSO<sub>4</sub>) and the solvent removed *in vacuo*. The crude residue was dissolved in 2:1 CH<sub>2</sub>Cl<sub>2</sub>/*i*PrOH (6 mL). The CH<sub>2</sub>Cl<sub>2</sub> was removed *in vacuo* to give a precipitate. Following addition of pentane (4 mL) the suspension was filtered over celite, washing copiously with pentane until the filtrate ran clear. After discarding the filtrate, the solid was dissolved in CH<sub>2</sub>Cl<sub>2</sub> and the solvent removed *in vacuo* to give the product as a yellow solid (0.0804 g, 91%).

**<sup>1</sup>H NMR** (400 MHz, CDCl<sub>3</sub>) δ: 8.92 (s, 1H, H<sub>w</sub>), 8.84 (d, *J* = 1.9 Hz, 1H, H<sub>l</sub>), 8.80 (br. app. s, 2H, H<sub>a</sub>, H<sub>m</sub>), 8.63 (d, *J* = 4.8 Hz, 1H, H<sub>v</sub>), 8.56 (dd, *J* = 5.0, 1.7 Hz, 1H, H<sub>b</sub>), 8.09 (app. t, *J* = 2.1 Hz, 1H, H<sub>k</sub>), 7.94 (app. dt, *J* = 7.9, 1.9 Hz, 1H, H<sub>t</sub>), 7.85-7.80 (m, 3H, H<sub>d</sub>, H<sub>j</sub>, H<sub>s</sub>), 7.69-7.57 (m, 14H, H<sub>e</sub>, H<sub>f</sub>, H<sub>g</sub>, H<sub>h</sub>, H<sub>i</sub>, H<sub>n</sub>, H<sub>o</sub>, H<sub>p</sub>, H<sub>q</sub>, H<sub>r</sub>), 7.41 (dd, *J* = 7.9, 4.8 Hz, 1H, H<sub>u</sub>), 7.30 (ddd, *J* = 7.9, 4.9, 0.9 Hz, 1H, H<sub>c</sub>).

**<sup>13</sup>C NMR** (101 MHz, CDCl<sub>3</sub>) δ: 152.4 (C<sub>a</sub>/C<sub>m</sub>), 151.1 (C<sub>a</sub>/C<sub>m</sub>), 148.8 (× 2, C<sub>b</sub>, C<sub>v</sub>), 148.4 (C<sub>w</sub>), 147.4 (C<sub>l</sub>), 141.4, 141.3, 141.0, 138.7, 138.6 (C<sub>d</sub>/C<sub>j</sub>/C<sub>s</sub>), 137.9, 137.0 (C<sub>k</sub>), 136.7, 136.2, 134.7 (C<sub>t</sub>), 132.4 (1 of C<sub>e</sub>/C<sub>f</sub>/C<sub>o</sub>/C<sub>n</sub>), 132.4 (1 of C<sub>e</sub>/C<sub>f</sub>/C<sub>o</sub>/C<sub>n</sub>), 129.9, 129.8, 127.4 (1 of C<sub>e</sub>/C<sub>f</sub>/C<sub>o</sub>/C<sub>n</sub>), 127.4 (1 of C<sub>e</sub>/C<sub>f</sub>/C<sub>o</sub>/C<sub>n</sub>), 127.3, 127.0, 126.7, 126.7, 126.1 (2 of C<sub>d</sub>/C<sub>j</sub>/C<sub>s</sub>), 123.8 (C<sub>u</sub>), 123.2 (C<sub>c</sub>), 122.0, 121.9, 120.6, 92.9, 92.6, 87.0, 86.9 (3 signals missing due to peak overlap).

**HR-ESI-MS** *m/z* = 586.2265 [M+H]<sup>+</sup> calc. 586.2283.

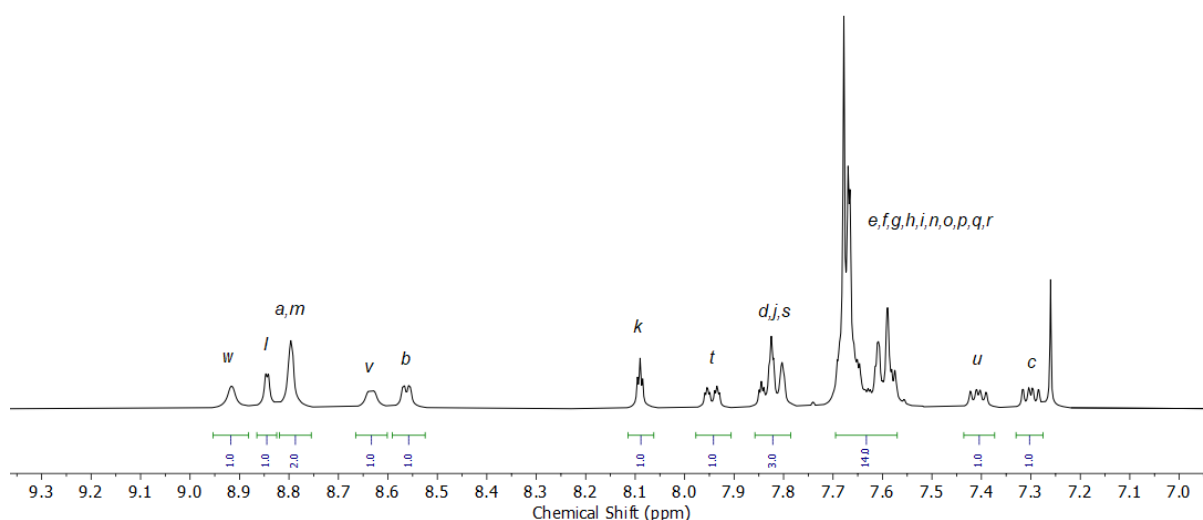

Figure S138 <sup>1</sup>H NMR (400 MHz, CDCl<sub>3</sub>) of L2<sup>Ph</sup>.

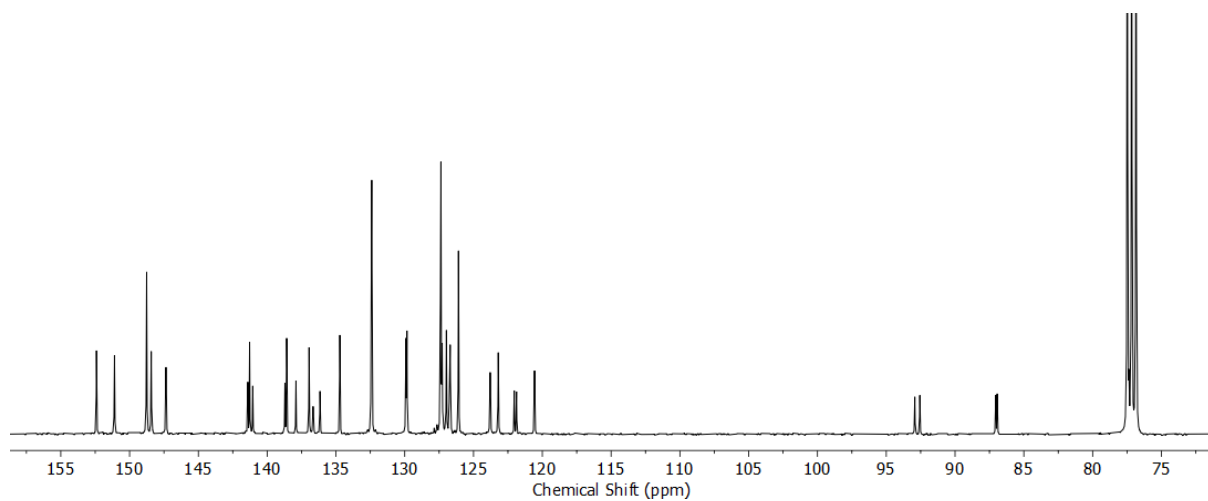

Figure S139  $^{13}\text{C}$  NMR (101 MHz,  $\text{CDCl}_3$ ) of  $\text{L2}^{\text{Ph}}$ .

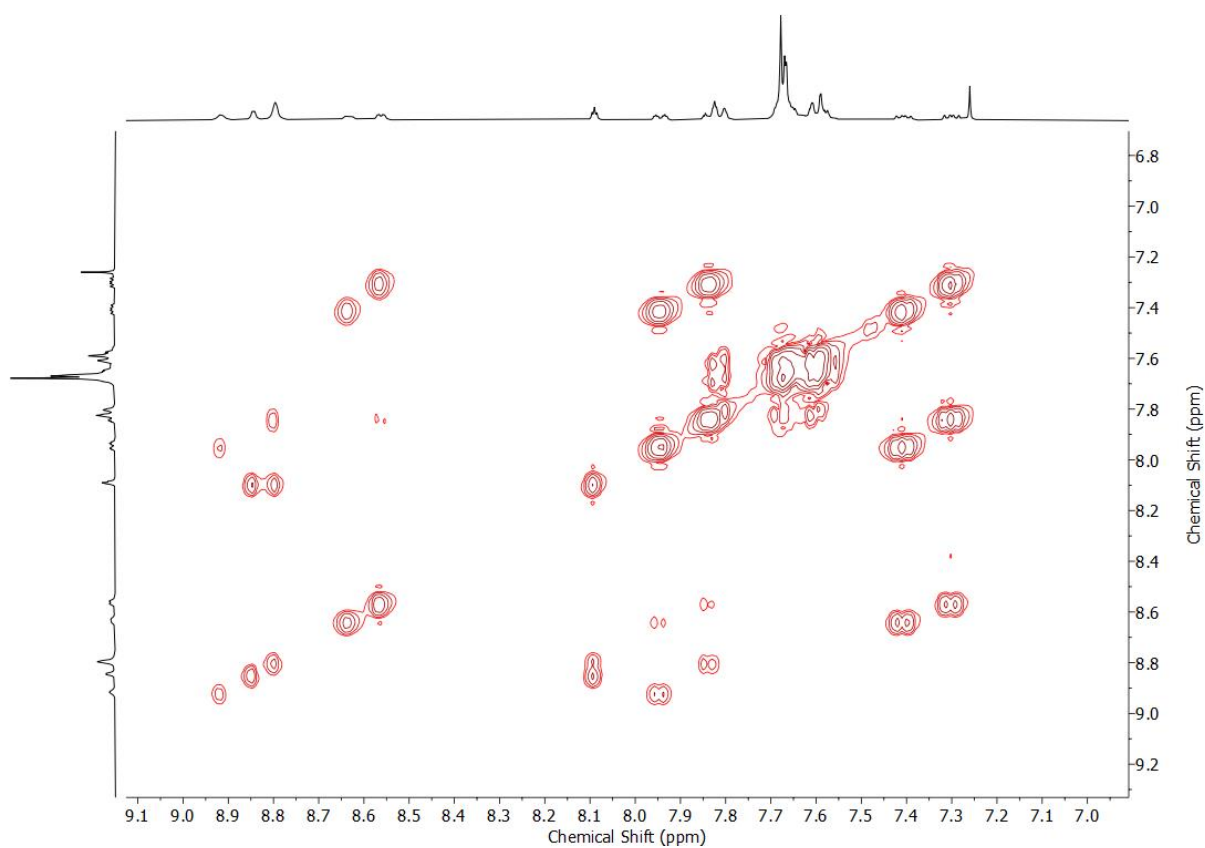

Figure S140 COSY NMR ( $\text{CDCl}_3$ ) of  $\text{L2}^{\text{Ph}}$ .

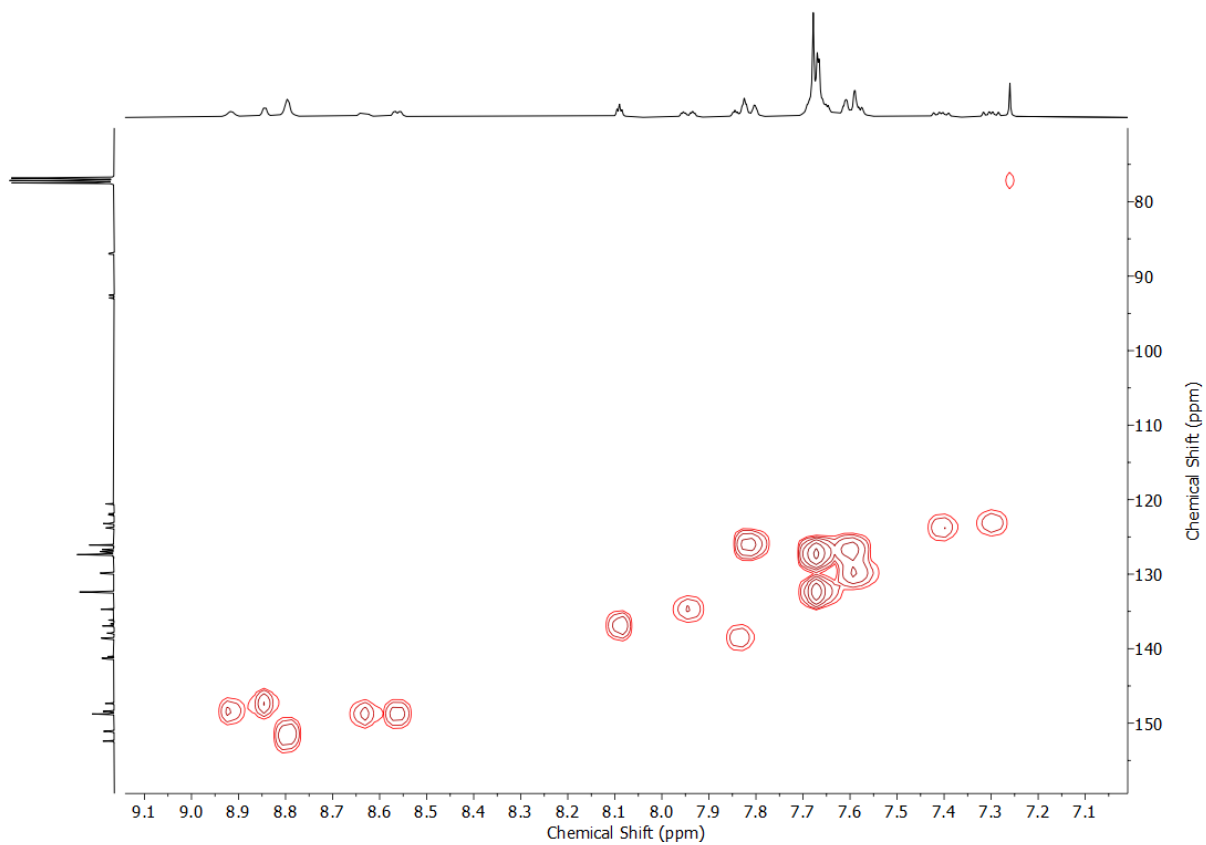

Figure S141 HSQC NMR ( $\text{CDCl}_3$ ) of  $\text{L2}^{\text{Ph}}$ .

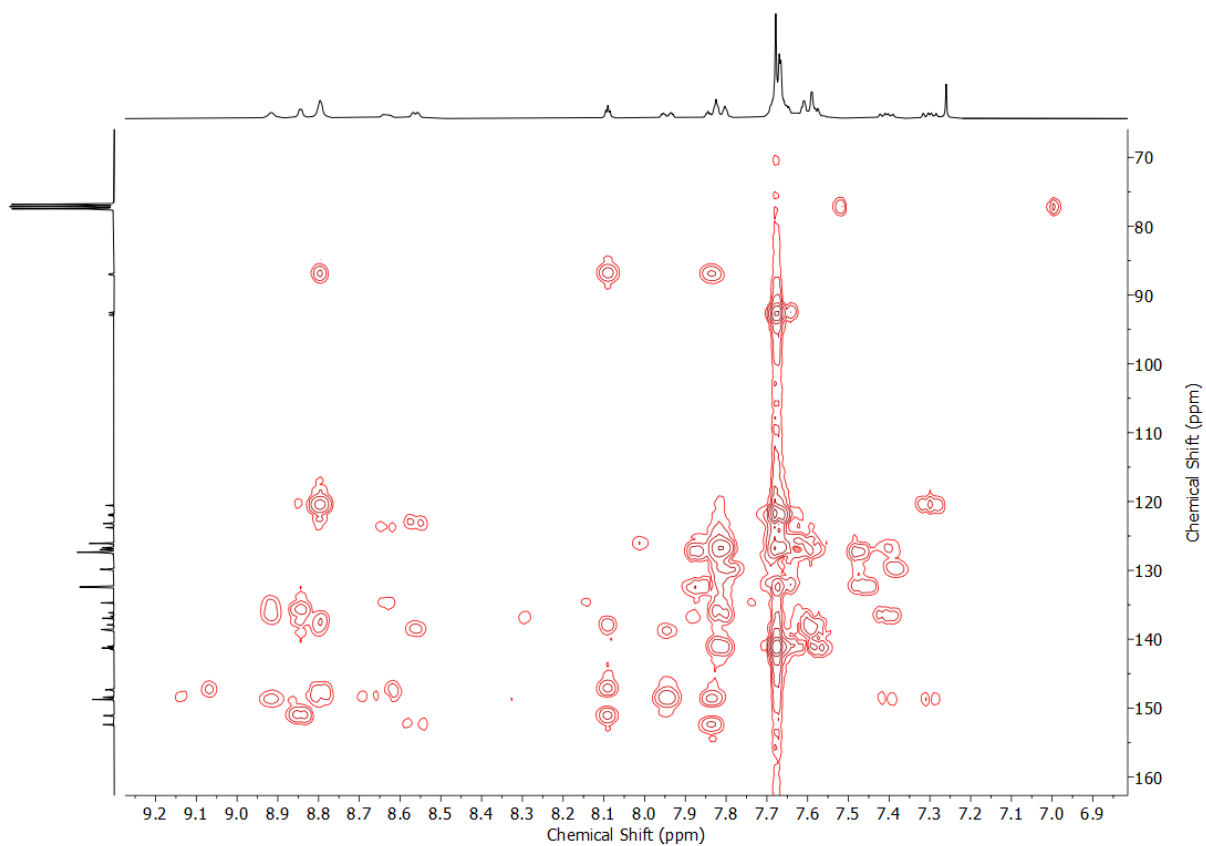

Figure S142 HMBC NMR ( $\text{CDCl}_3$ ) of  $\text{L2}^{\text{Ph}}$ .

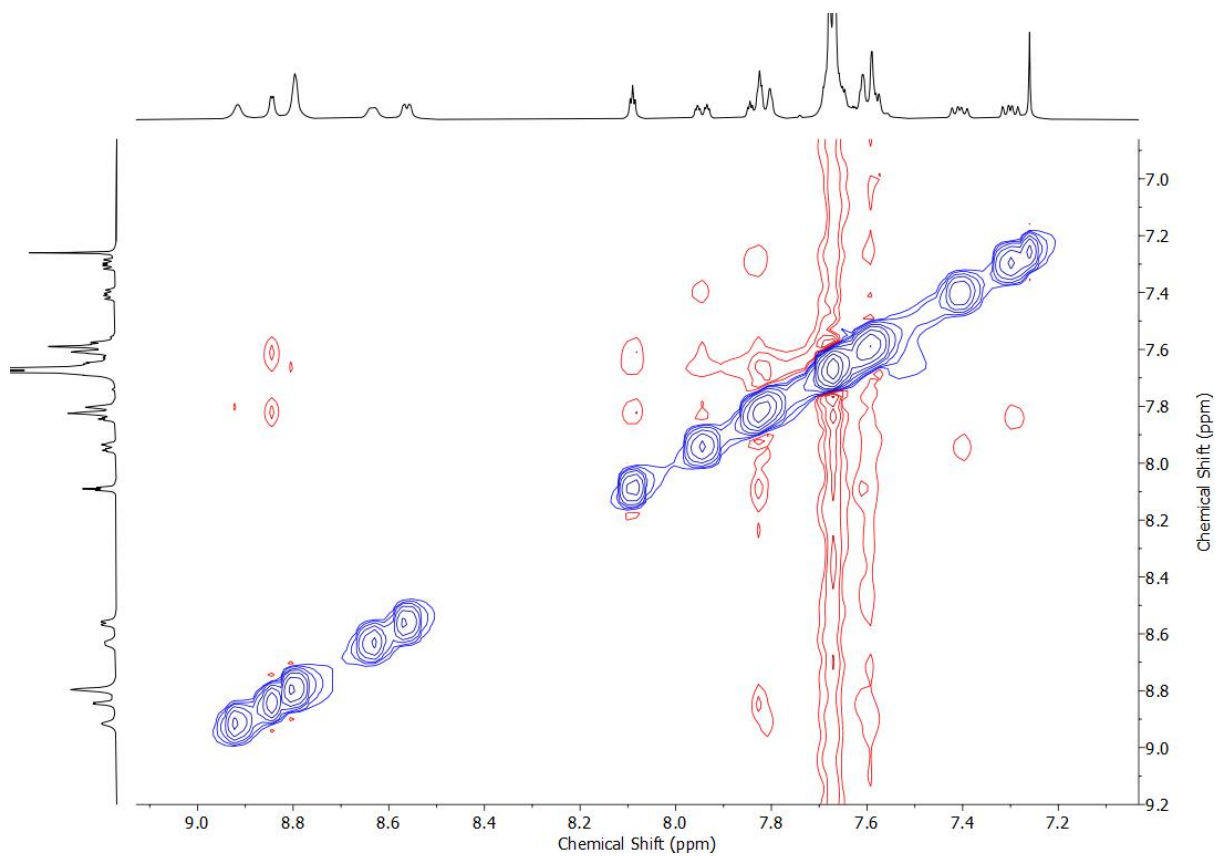

Figure S143 NOESY (CDCl<sub>3</sub>) of L2<sup>Ph</sup>.

### Synthesis of *cis*-[Pd<sub>3</sub>(L<sup>2Ph</sup>)<sub>4</sub>](BF<sub>4</sub>)<sub>6</sub> (C<sup>2Ph</sup>)

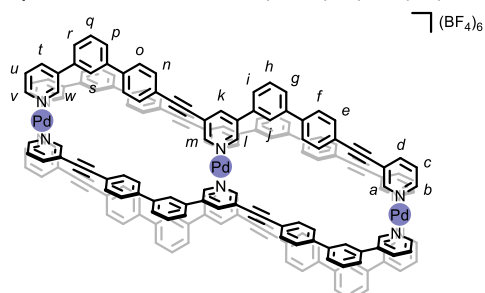

To a solution of [Pd(CH<sub>3</sub>CN)<sub>4</sub>](BF<sub>4</sub>)<sub>2</sub> (6.7 mg, 15 μL) in *d*<sub>6</sub>-DMSO (0.75 mL) was added L<sup>2Ph</sup> (11.7 mg, 20 μmol, 4 eq.) in CDCl<sub>3</sub> (0.25 mL). After standing at 50 °C for 3 d, quantitative conversion to *cis*-[Pd<sub>3</sub>(L<sup>2Ph</sup>)<sub>4</sub>](BF<sub>4</sub>)<sub>6</sub> (C<sup>2Ph</sup>) was observed by <sup>1</sup>H NMR.

<sup>1</sup>H NMR (400 MHz, 3:1 *d*<sub>6</sub>-DMSO/CDCl<sub>3</sub>) δ: 9.94 (s, 4H, H<sub>m</sub>), 9.89 (s, 4H, H<sub>a</sub>), 9.60 (s, 4H, H<sub>i</sub>), 9.51 (s, 4H, H<sub>w</sub>), 9.44 (d, *J* = 5.9 Hz, 4H, H<sub>v</sub>), 9.33 (d, *J* = 5.5 Hz, 4H, H<sub>b</sub>), 8.78 (s, 4H, H<sub>k</sub>), 8.55 (d, *J* = 8.3 Hz, 8H, H<sub>t</sub>), 8.42 (s, 4H, H<sub>j</sub>), 8.34 (s, 4H, H<sub>s</sub>), 8.20 (d, *J* = 8.1 Hz, 4H, H<sub>d</sub>), 8.09 (d, *J* = 7.7 Hz, 8H, H<sub>o</sub>), 8.04 (d, *J* = 7.8 Hz, 8H, H<sub>f</sub>), 7.94-7.90 (m, 8H, H<sub>i</sub>, H<sub>u</sub>), 7.86-7.75 (m, 64H, H<sub>c</sub>, H<sub>e</sub>, H<sub>g</sub>, H<sub>n</sub>, H<sub>p</sub>, H<sub>r</sub>), 7.63-7.59 (m, 8H, H<sub>h</sub>, H<sub>q</sub>).

**Diffusion coefficient** (400 MHz, 3:1 *d*<sub>6</sub>-DMSO/CDCl<sub>3</sub>) *D*: 8.73 × 10<sup>-11</sup> m<sup>2</sup>s<sup>-1</sup>.

<sup>13</sup>C NMR (101 MHz, 3:1 *d*<sub>6</sub>-DMSO/CDCl<sub>3</sub>) δ: 153.6 (C<sub>a</sub>), 152.0 (C<sub>m</sub>), 150.6 (C<sub>b</sub>), 150.2 (C<sub>v</sub>), 148.6 (C<sub>w</sub>), 148.1 (C<sub>i</sub>), 142.5 (C<sub>d</sub>), 141.2, 140.6, 140.1 (C<sub>k</sub>), 139.1 (C<sub>t</sub>), 138.6, 138.0, 134.9, 133.9, 132.7, 130.8, 129.1, 128.4, 128.2, 128.0, 127.5, 127.3, 124.9 (×2, C<sub>j</sub>, C<sub>s</sub>), 123.6, 123.5, 121.0, 120.8, 118.0, 95.8, 95.3, 85.3, 85.0 (5 signals missing due to peak overlap).

**ESI-MS** *m/z* = 973.74 {[Pd<sub>3</sub>(L<sup>2Ph</sup>)<sub>4</sub>(BF<sub>4</sub>)<sub>3</sub>]<sup>3+</sup> calc. 973.87; 1504.10 {[Pd<sub>3</sub>(L<sup>2Ph</sup>)<sub>4</sub>(BF<sub>4</sub>)<sub>4</sub>]<sup>2+</sup> calc. 1504.31.

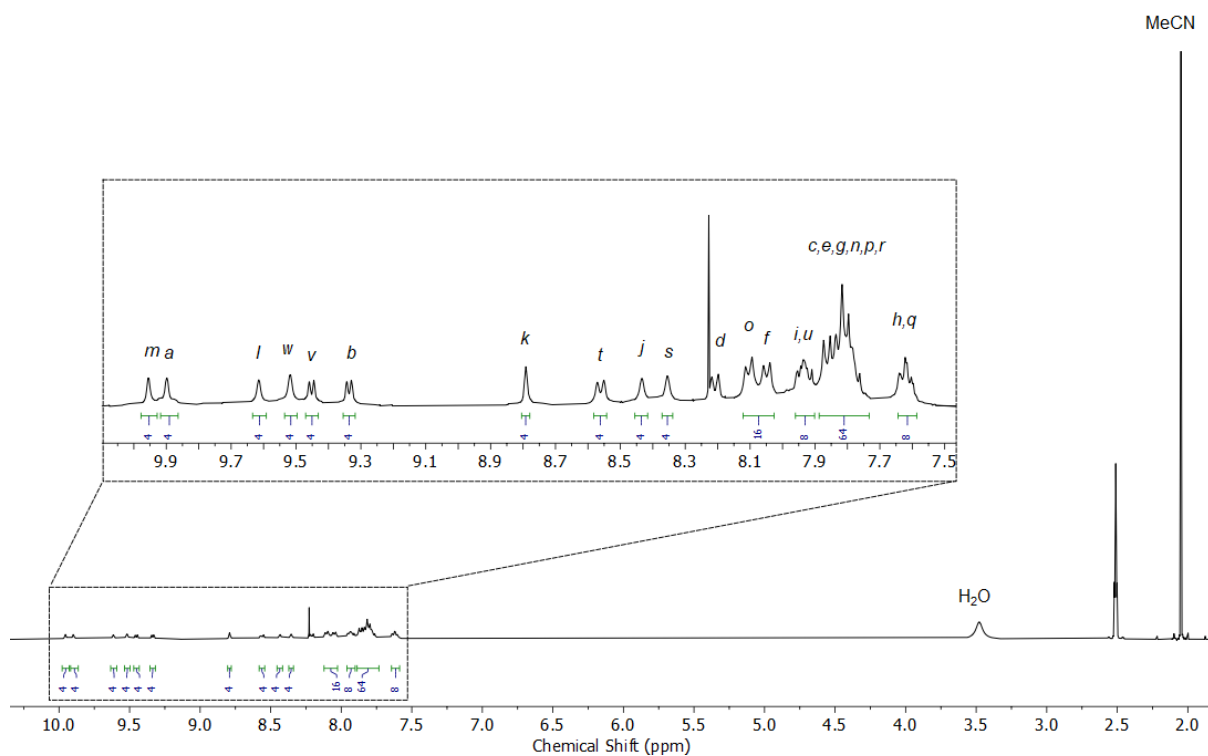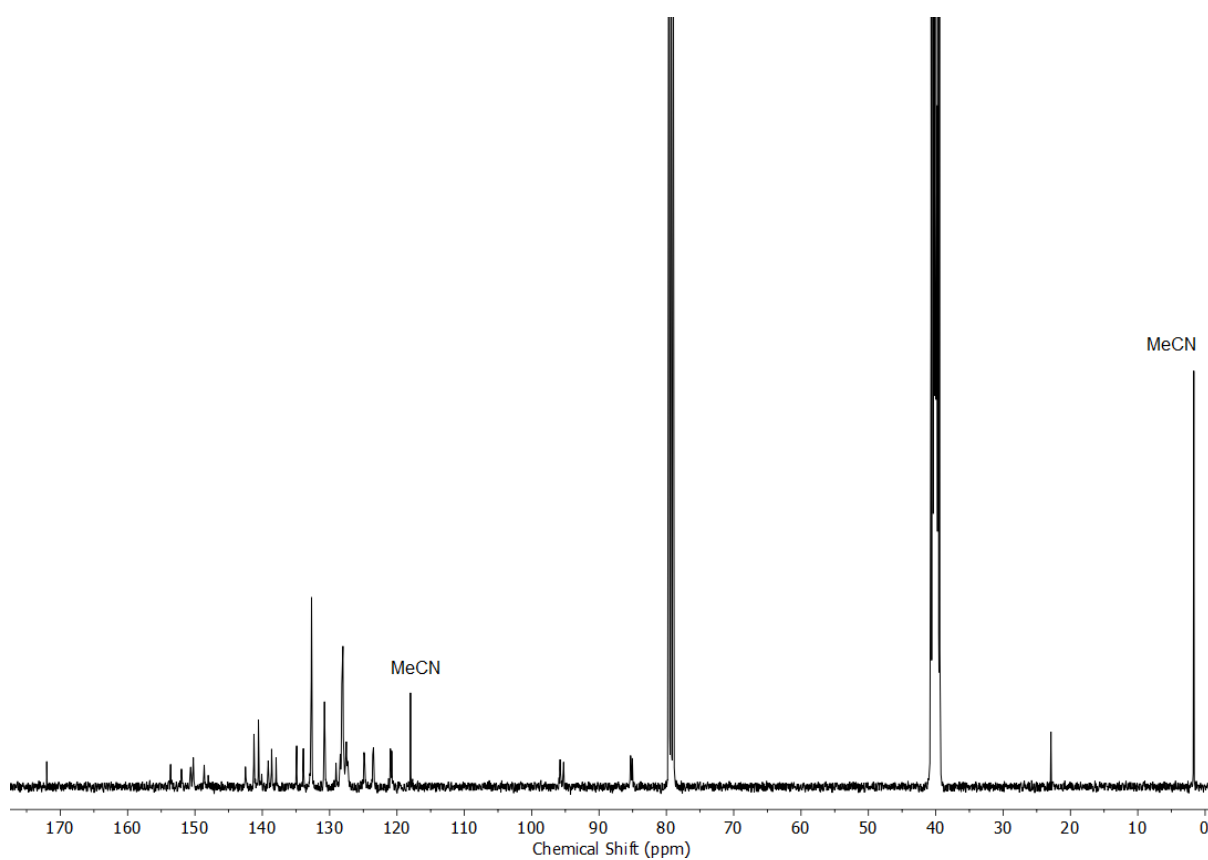

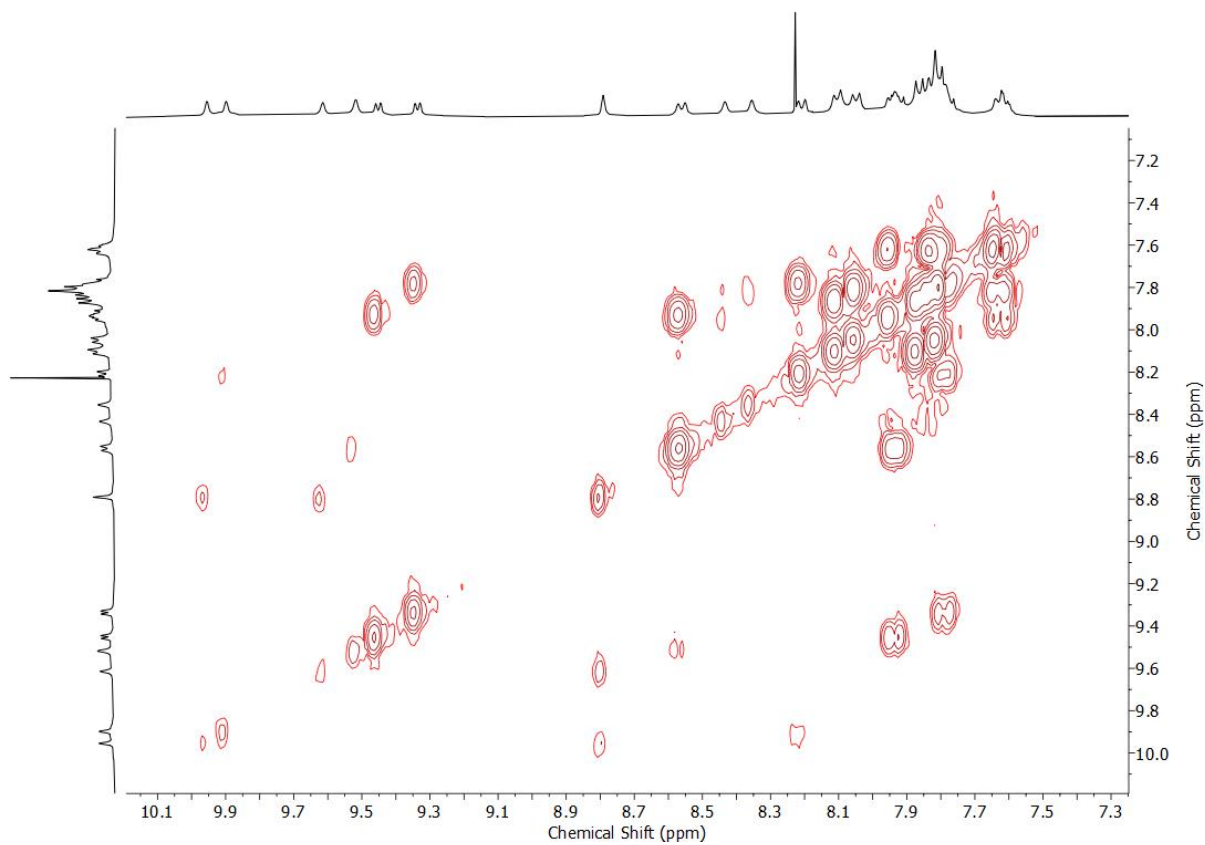

Figure S146 COSY NMR (3:1  $d_6$ -DMSO/ $CDCl_3$ ) of  $[Pd_3(L2^{Ph})_4](BF_4)_6$ .

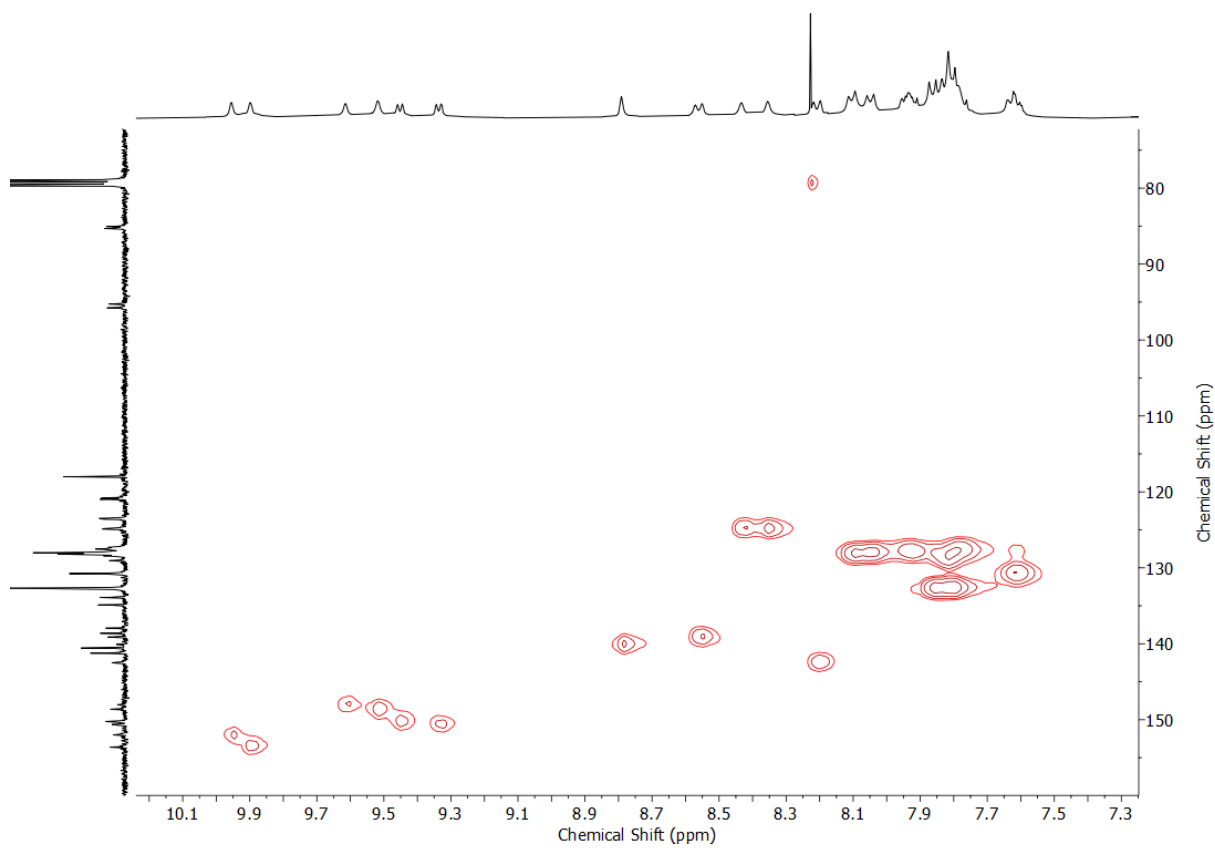

Figure S147 HSQC NMR (3:1  $d_6$ -DMSO/ $CDCl_3$ ) of  $[Pd_3(L2^{Ph})_4](BF_4)_6$ .



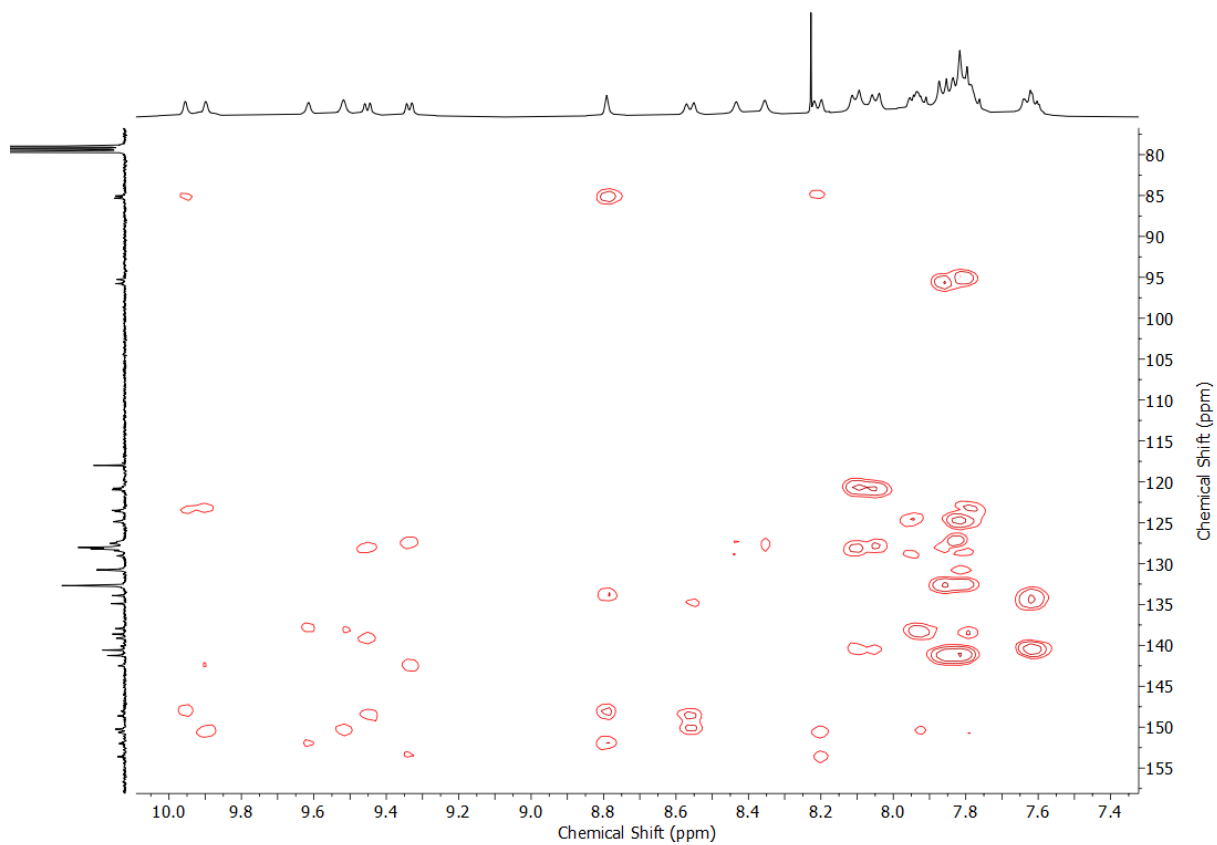

Figure S148 HMBC NMR (3:1  $d_6$ -DMSO/ $CDCl_3$ ) of  $[Pd_3(L2^{Ph})_4](BF_4)_6$ .

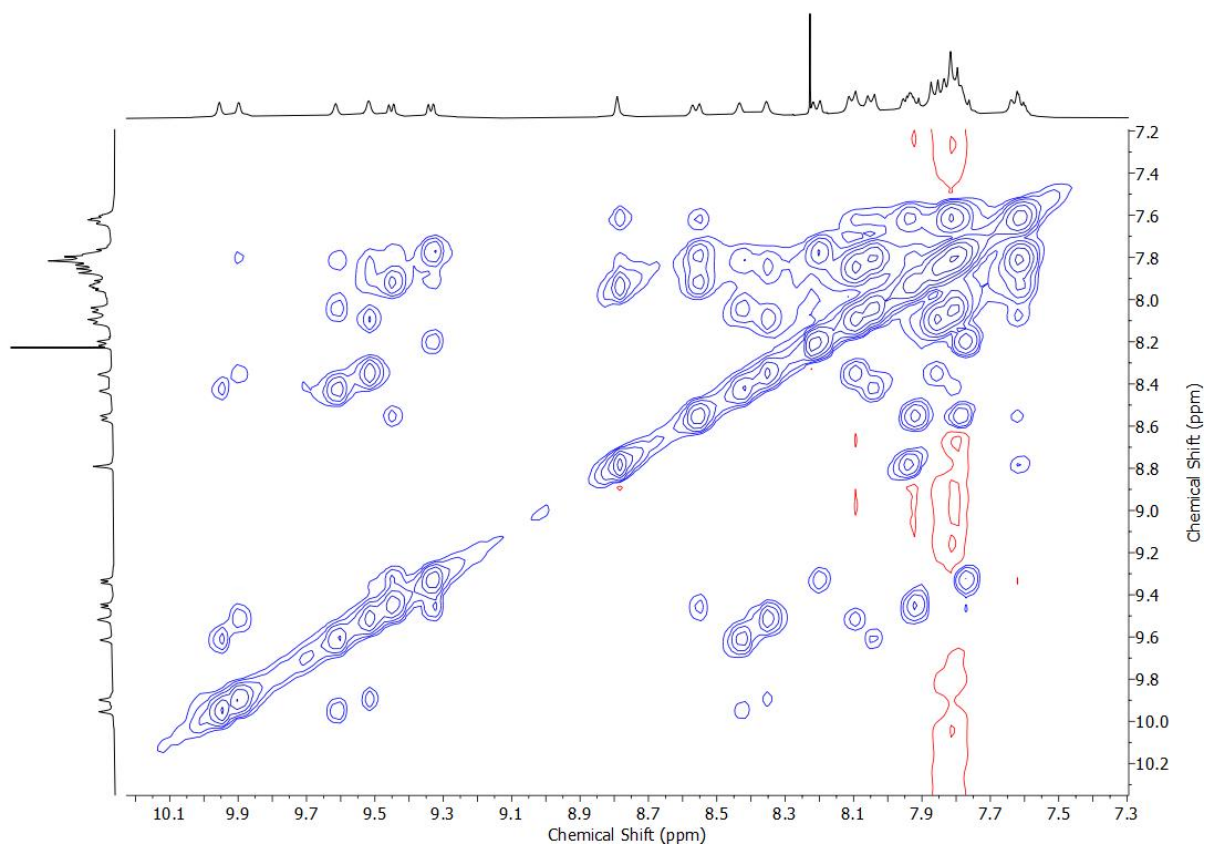

Figure S149 NOESY (3:1  $d_6$ -DMSO/ $CDCl_3$ ) of  $[Pd_3(L2^{Ph})_4](BF_4)_6$ .

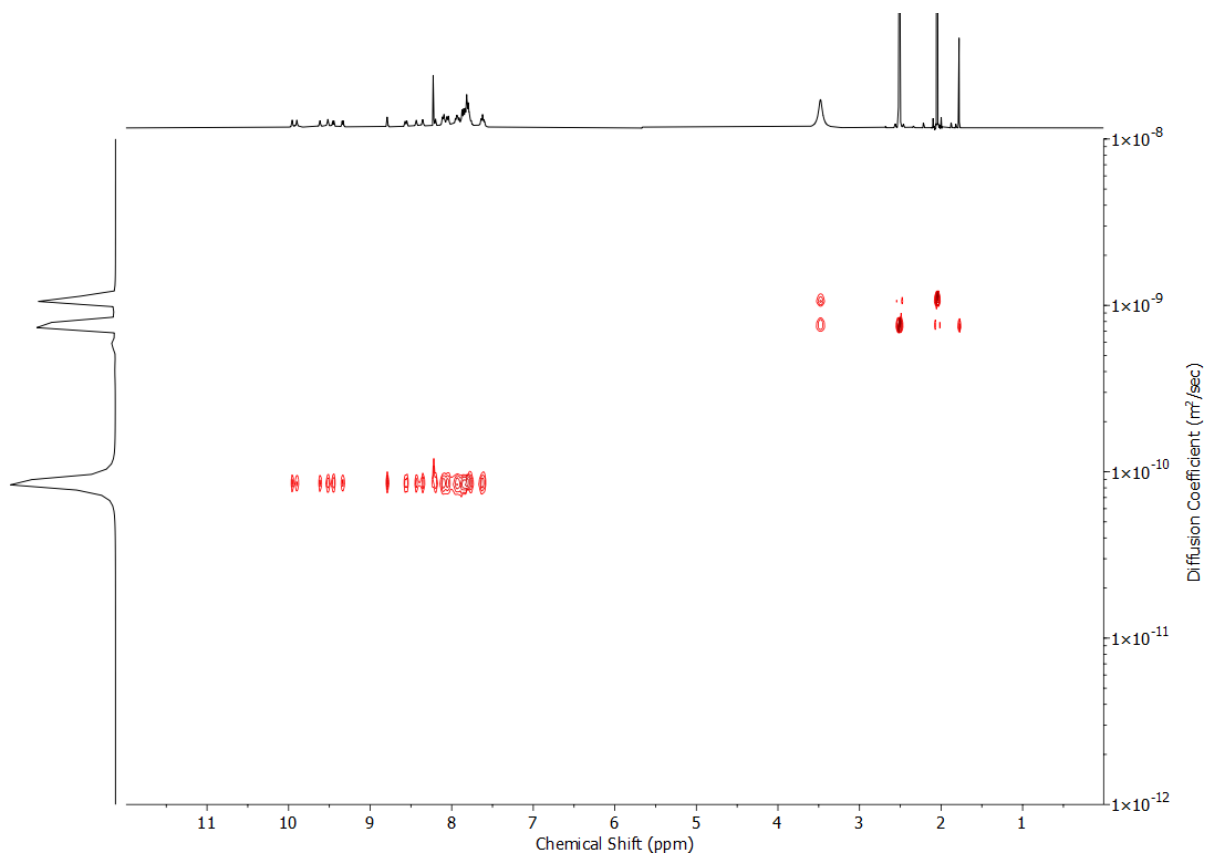

Figure S150 DOSY (3:1  $d_6$ -DMSO/ $CDCl_3$ ) of  $[Pd_3(L2^{Ph})_4](BF_4)_6$ .

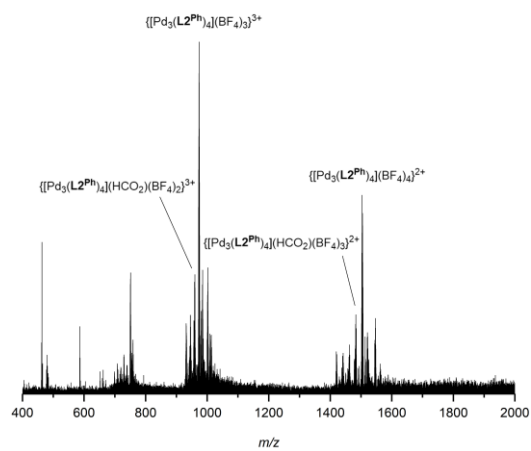

Figure S151 ESI-MS of  $[Pd_3(L2^{Ph})_4](BF_4)_6$ .

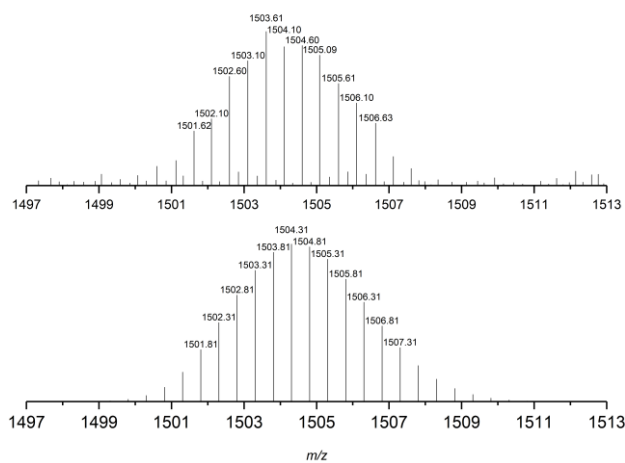

Figure S152 Observed (top) and calculated (bottom) isotopic patterns for  $\{[\text{Pd}_3(\text{L2}^{\text{Ph}})_4(\text{BF}_4)_4]^{2+}$ .

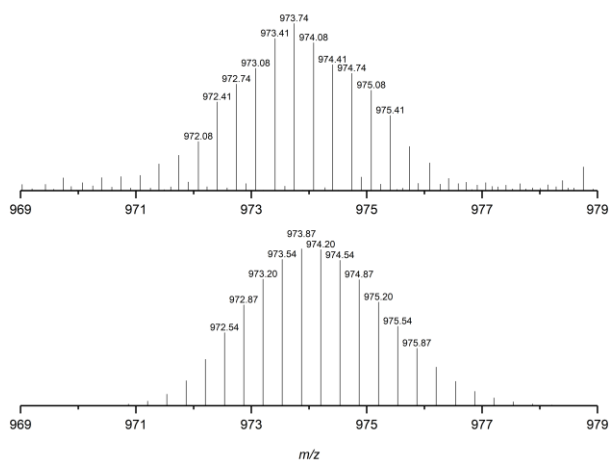

Figure S153 Observed (top) and calculated (bottom) isotopic patterns for  $\{[\text{Pd}_3(\text{L2}^{\text{Ph}})_4(\text{BF}_4)_3]^{3+}$ .

## Synthesis of L2<sup>Xy</sup>

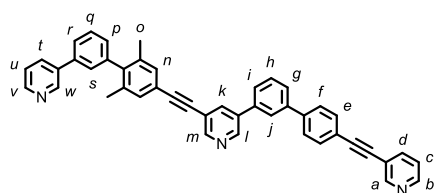

**L1<sup>CH</sup>** (0.0535 g, 0.15 mmol, 1 eq.), **S9** (0.0578 g, 0.15 mmol, 1 eq.), Pd(PPh<sub>3</sub>)<sub>4</sub> (0.0087 g, 0.0075 mmol, 5 mol%) and CuI (0.0014 g, 0.0075 mmol, 5 mol%) were stirred at rt in 1:1 <sup>i</sup>Pr<sub>2</sub>NH/dioxane (2 mL) for 24 h. EDTA solution (20 mL) was added and the aqueous phase extracted with CH<sub>2</sub>Cl<sub>2</sub> (3 × 10 ML). The combined organic phases were dried (MgSO<sub>4</sub>) and the solvent removed *in vacuo*. Following purification by column chromatography on silica gel (CH<sub>2</sub>Cl<sub>2</sub> with step gradient 0 to 30% acetone in 10% increments) a light orange oil was obtained. This was dissolved in a minimal amount of CH<sub>2</sub>Cl<sub>2</sub> before the addition of <sup>i</sup>PrOH (2 mL). The CH<sub>2</sub>Cl<sub>2</sub> was removed under a flow of air before an excess of pentane was added. The mother liquor was carefully decanted from the resultant precipitate which was dried *in vacuo* to give the product as an off-white foam (0.0647 g, 70%).

**<sup>1</sup>H NMR** (400 MHz, CDCl<sub>3</sub>) δ: 8.89 (br. s, 1H, H<sub>w</sub>), 8.84 (d, *J* = 2.2 Hz, 1H, H<sub>l</sub>), 8.80 (d, *J* = 1.5 Hz, 1H, H<sub>a</sub>), 8.78 (d, *J* = 1.9 Hz, 1H, H<sub>m</sub>), 8.61 (br. d, *J* = 4.8 Hz, 1H, H<sub>v</sub>), 8.57 (dd, *J* = 4.9, 1.7 Hz, 1H, H<sub>b</sub>), 8.08 (t, *J* = 2.1 Hz, 1H, H<sub>k</sub>), 7.94 (ddd, *J* = 7.9, 2.4, 1.6 Hz, 1H, H<sub>t</sub>), 7.86-7.82 (m, 2H, H<sub>d</sub>, H<sub>j</sub>), 7.70-7.55 (m, 9H, H<sub>e</sub>, H<sub>f</sub>, H<sub>g</sub>, H<sub>h</sub>, H<sub>i</sub>, H<sub>q</sub>, H<sub>r</sub>), 7.42-7.37 (m, 4H, H<sub>n</sub>, H<sub>s</sub>, H<sub>u</sub>), 7.31 (ddd, *J* = 7.9, 4.9, 0.9 Hz, 1H, H<sub>c</sub>), 7.21 (app. dt, *J* = 6.9, 1.7 Hz, 1H, H<sub>p</sub>), 2.10 (s, 6H, H<sub>o</sub>).

**<sup>13</sup>C NMR** (101 MHz, CDCl<sub>3</sub>) δ: 152.4 (C<sub>a</sub>), 151.1 (C<sub>m</sub>), 148.8 (C<sub>b</sub>), 148.4 (C<sub>v</sub>), 148.1 (C<sub>w</sub>), 147.2 (C<sub>i</sub>), 142.4, 141.4 (×2), 141.1, 138.6 (C<sub>d</sub>), 138.1, 138.0, 137.0, 136.7, 136.6 (C<sub>k</sub>), 136.1, 134.8 (C<sub>t</sub>), 132.4 (C<sub>e</sub>/C<sub>f</sub>), 130.8 (C<sub>n</sub>/C<sub>s</sub>/C<sub>u</sub>), 129.9 (C<sub>g</sub>/C<sub>h</sub>/C<sub>i</sub>/C<sub>q</sub>/C<sub>r</sub>), 129.6 (C<sub>g</sub>/C<sub>h</sub>/C<sub>i</sub>/C<sub>q</sub>/C<sub>r</sub>), 128.9 (C<sub>p</sub>), 127.6 (C<sub>n</sub>/C<sub>s</sub>/C<sub>u</sub>), 127.4 (C<sub>e</sub>/C<sub>f</sub>), 127.3 (C<sub>g</sub>/C<sub>h</sub>/C<sub>i</sub>/C<sub>q</sub>/C<sub>r</sub>), 126.7 (C<sub>g</sub>/C<sub>h</sub>/C<sub>i</sub>/C<sub>q</sub>/C<sub>r</sub>), 126.1 (C<sub>g</sub>/C<sub>h</sub>/C<sub>i</sub>/C<sub>q</sub>/C<sub>r</sub>), 125.9 (C<sub>j</sub>), 123.9 (C<sub>n</sub>/C<sub>s</sub>/C<sub>u</sub>), 123.2 (C<sub>c</sub>), 122.0, 121.3, 120.8, 120.6, 93.3, 92.6, 87.0, 85.6, 21.0 (C<sub>o</sub>).

**HR-ESI-MS** *m/z* = 614.2582 [M+H]<sup>+</sup> calc. 614.2596.

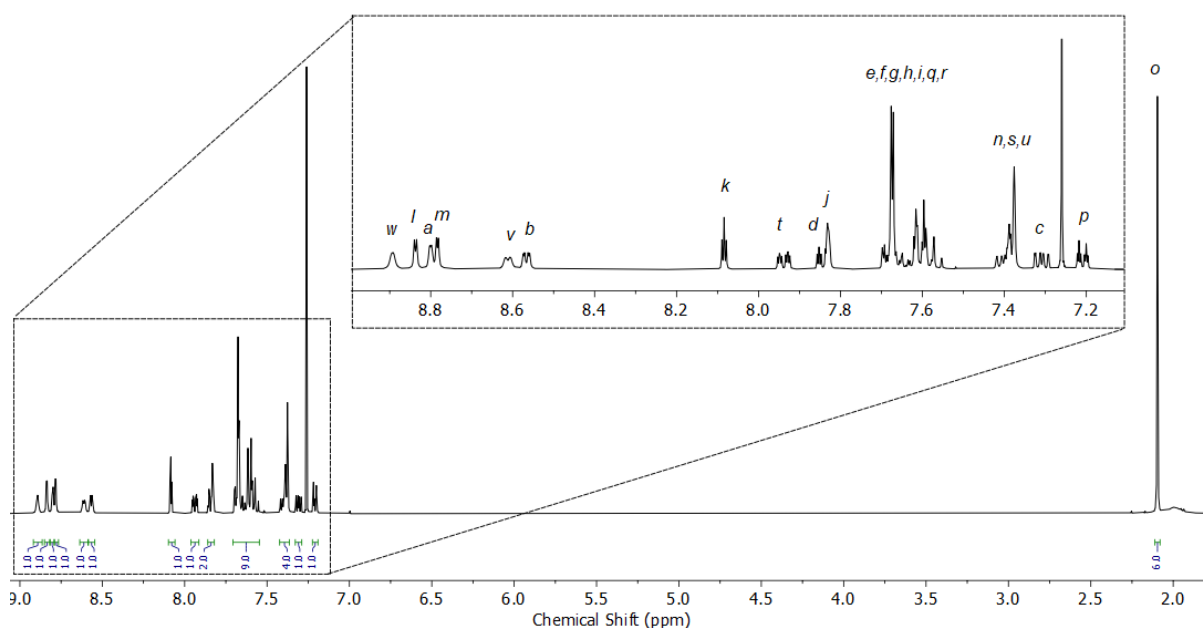

Figure S154  $^1\text{H}$  NMR (400 MHz,  $\text{CDCl}_3$ ) of  $\text{L2}^{\text{xy}}$ .

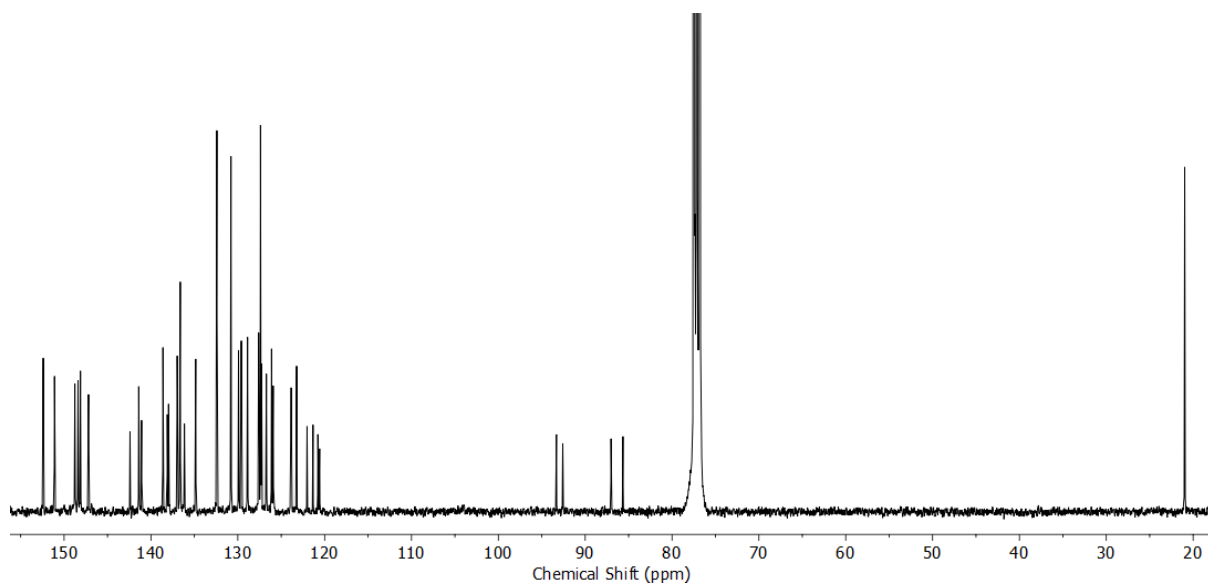

Figure S155  $^{13}\text{C}$  NMR (101 MHz,  $\text{CDCl}_3$ ) of  $\text{L2}^{\text{xy}}$ .

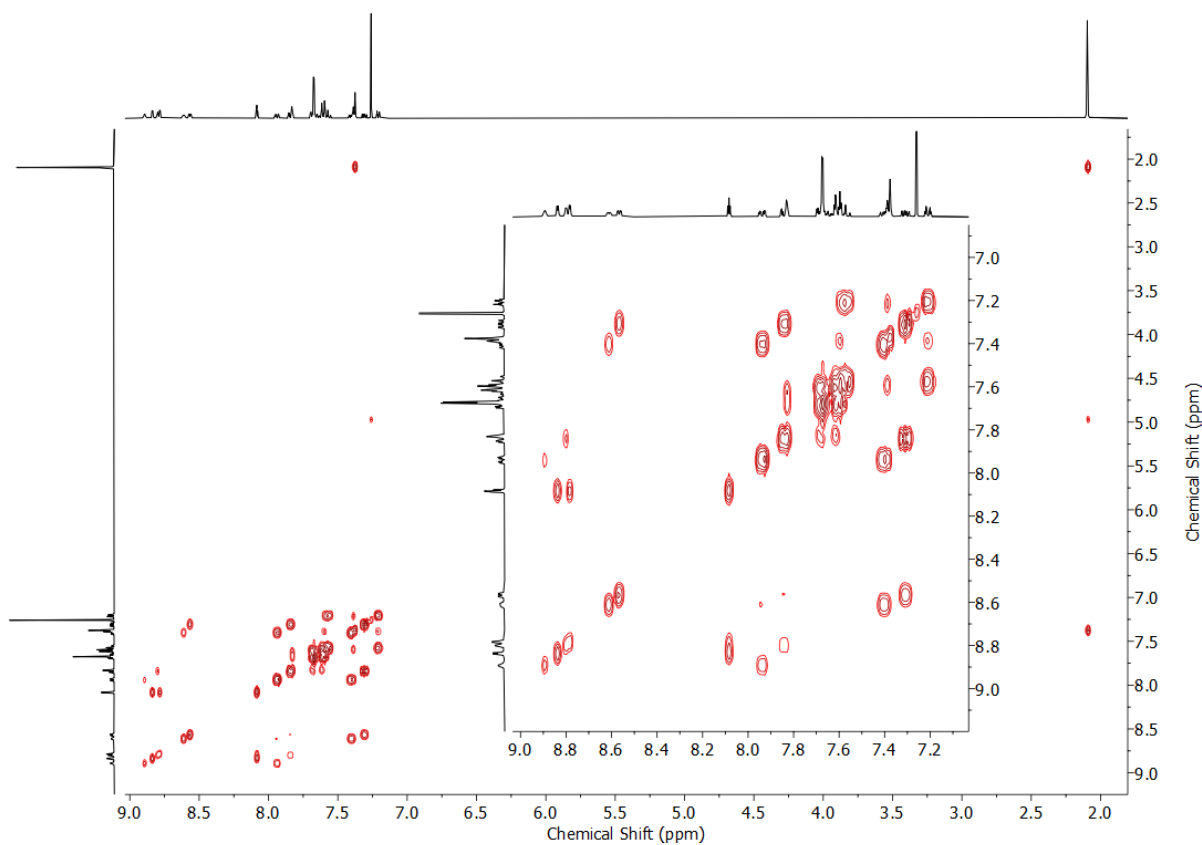

Figure S156 COSY NMR ( $\text{CDCl}_3$ ) of  $\text{L2}^{\text{xy}}$ .

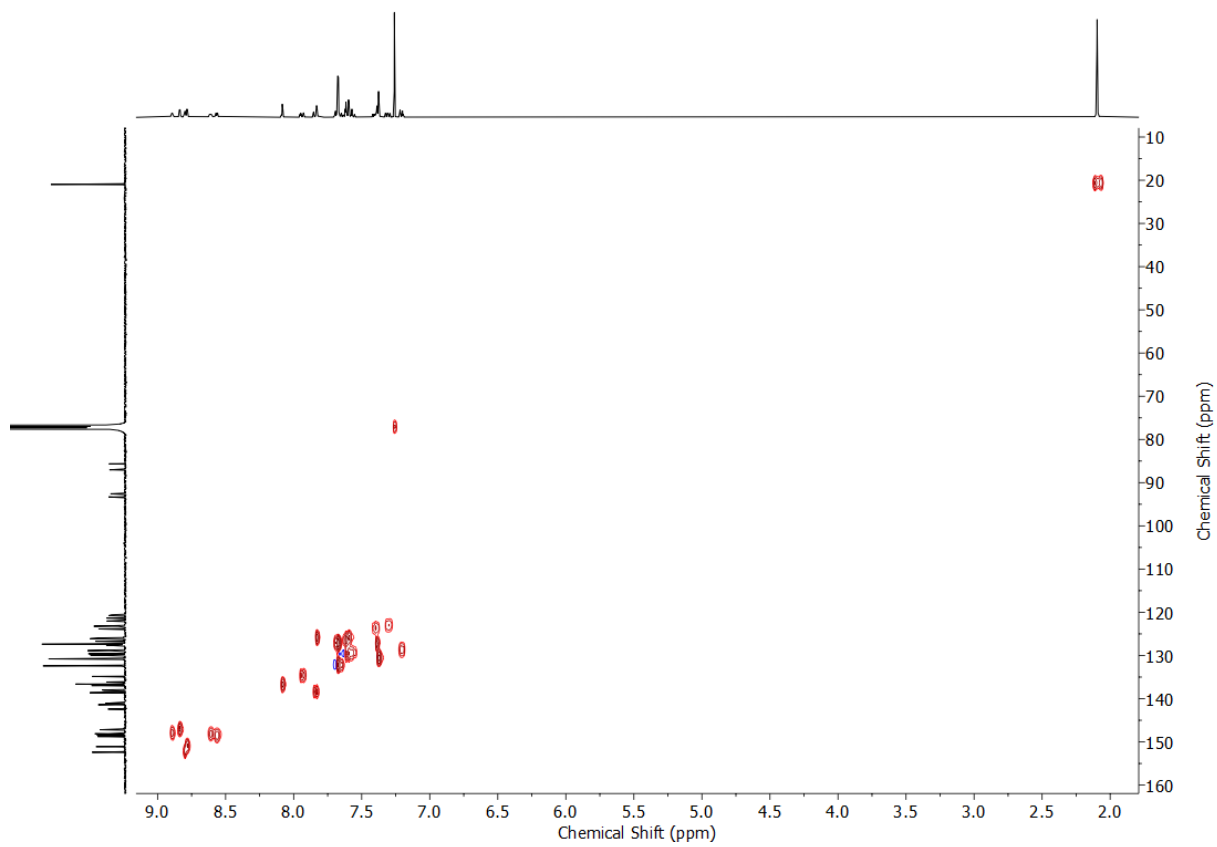

Figure S157 HSQC NMR (CDCl<sub>3</sub>) of L2<sup>xy</sup>.

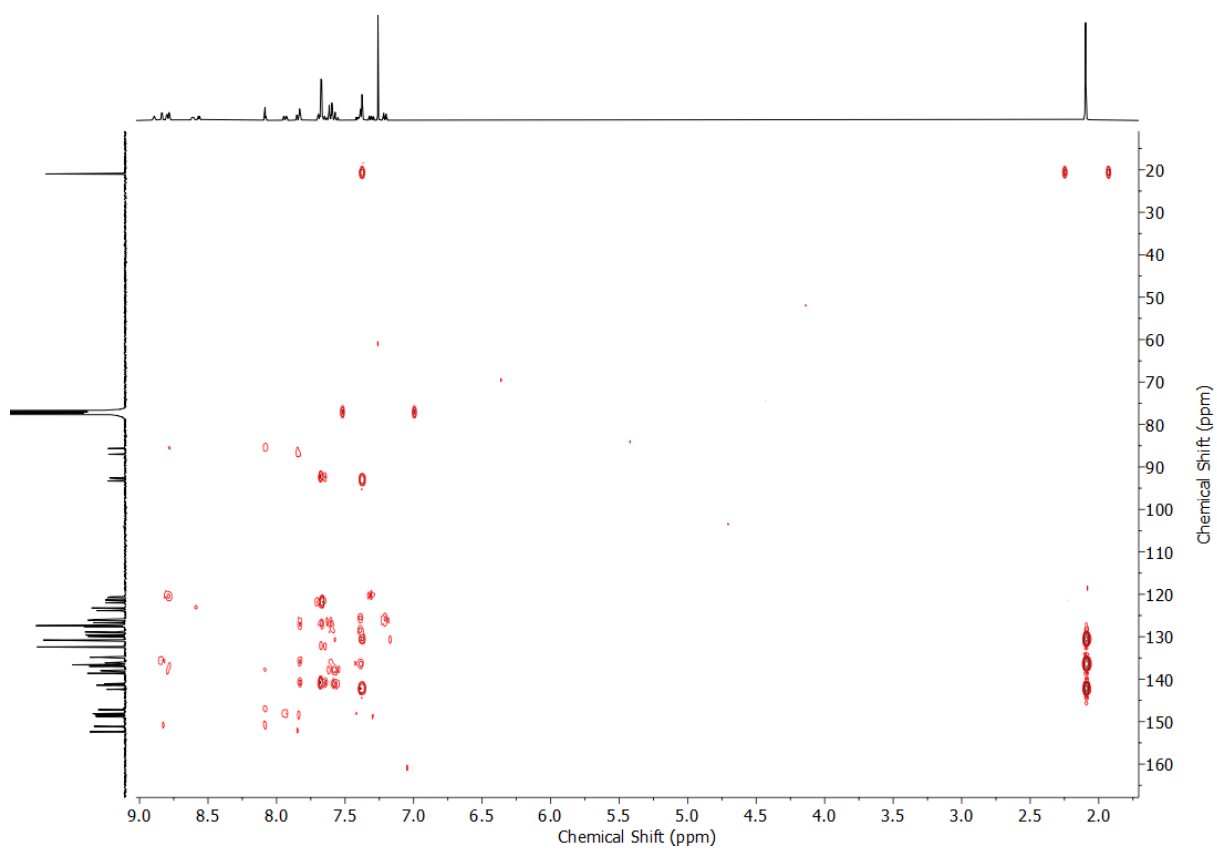

Figure S158 HMBC NMR (CDCl<sub>3</sub>) of L2<sup>xy</sup>.

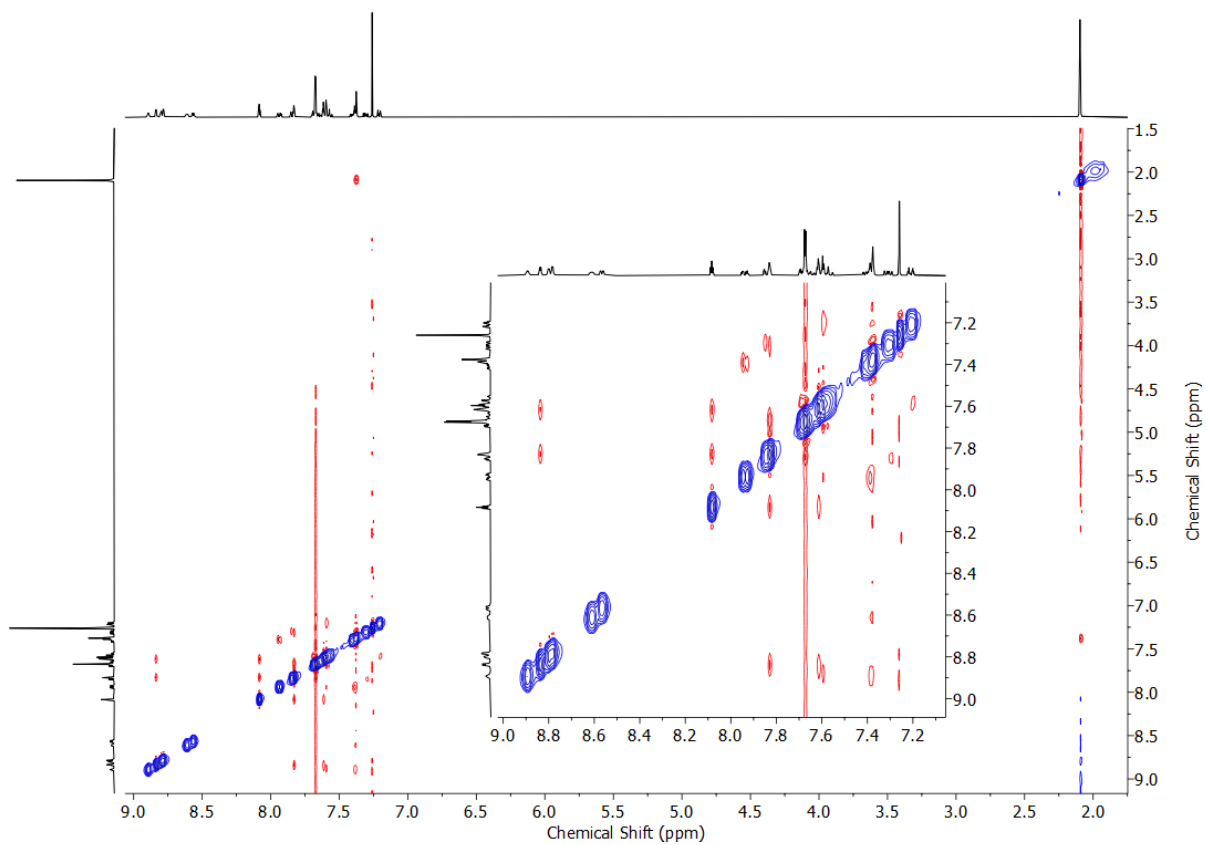

Figure S159 NOESY (CDCl<sub>3</sub>) of L2<sup>xy</sup>.

## Synthesis of *cis*-[Pd<sub>3</sub>(L<sup>2<sup>Xy</sup></sup>)<sub>4</sub>](BF<sub>4</sub>)<sub>6</sub> (C<sup>2<sup>Xy</sup></sup>)

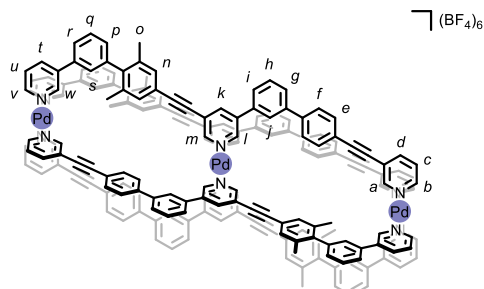

To a solution of [Pd(CH<sub>3</sub>CN)<sub>4</sub>](BF<sub>4</sub>)<sub>2</sub> (6.7 mg, 15 μL) in *d*<sub>6</sub>-DMSO (0.75 mL) was added L<sup>2<sup>Xy</sup></sup> (12.3 mg, 20 μmol, 4 eq.) in CDCl<sub>3</sub> (0.25 mL). After standing at 50 °C for 3 d, quantitative conversion to *cis*-[Pd<sub>3</sub>(L<sup>2<sup>Xy</sup></sup>)<sub>4</sub>](BF<sub>4</sub>)<sub>6</sub> (C<sup>2<sup>Xy</sup></sup>) was observed by <sup>1</sup>H NMR.

<sup>1</sup>H NMR (400 MHz, 3:1 *d*<sub>6</sub>-DMSO/CDCl<sub>3</sub>) δ: 10.00 (s, 4H, H<sub>m</sub>), 9.71 (s, 4H, H<sub>o</sub>), 9.61 (s, 4H, H<sub>l</sub>), 9.30 (d, *J* = 5.3 Hz, 4H, H<sub>v</sub>), 9.26 (d, *J* = 5.9 Hz, 4H, H<sub>b</sub>), 9.16 (s, 4H, H<sub>w</sub>), 8.78 (s, 4H, H<sub>k</sub>), 8.55-8.53 (m, 8H, H<sub>j</sub>, H<sub>t</sub>), 8.24 (m, 8H, H<sub>i</sub>), 8.18 (d, *J* = 8.1 Hz, 4H, H<sub>d</sub>), 7.96 (d, *J* = 7.9 Hz, 4H, H<sub>i</sub>), 7.92-7.89 (m, 8H, H<sub>g</sub>, H<sub>u</sub>), 7.80 (d, *J* = 7.9 Hz, 8H, H<sub>e</sub>), 7.76-7.73 (m, 8H, H<sub>c</sub>, H<sub>r</sub>), 7.65-7.60 (m, 12H, H<sub>h</sub>, H<sub>p</sub>, H<sub>s</sub>), 7.47 (s, 4H, H<sub>n</sub>), 7.29-7.27 (m, 8H, H<sub>n'</sub>, H<sub>q</sub>), 2.03 (s, 12H, H<sub>o</sub>), 1.93 (s, 12H, H<sub>o'</sub>).

**Diffusion coefficient** (400 MHz, 3:1 *d*<sub>6</sub>-DMSO/CDCl<sub>3</sub>) *D*: 8.68 × 10<sup>-11</sup> m<sup>2</sup>s<sup>-1</sup>.

<sup>13</sup>C NMR (101 MHz, 3:1 *d*<sub>6</sub>-DMSO/CDCl<sub>3</sub>) δ: 152.3 (C<sub>o</sub>), 151.8 (C<sub>m</sub>), 150.2 (C<sub>b</sub>), 149.4 (C<sub>v</sub>), 148.2 (C<sub>w</sub>), 147.1 (C<sub>i</sub>), 142.4, 142.1 (C<sub>d</sub>), 140.5, 140.1, 139.6, 139.3 (C<sub>k</sub>), 138.4 (C<sub>j</sub>/C<sub>t</sub>), 137.9, 137.8, 136.3, 136.1, 134.3, 133.5, 132.3 (C<sub>e</sub>), 130.3, 130.1, 129.5, 128.1, 127.6, 127.4, 127.1, 127.0, 126.3, 125.5, 123.7 (C<sub>j</sub>/C<sub>t</sub>), 123.5, 122.9, 120.2, 120.1, 117.5, 95.0, 94.9, 84.3, 82.9, 20.5 (C<sub>o</sub>), 20.3 (C<sub>o'</sub>).

**ESI-MS** *m/z* = 969.48 {[Pd<sub>3</sub>(L<sup>2<sup>Xy</sup></sup>)<sub>4</sub>(HCO<sub>2</sub>)<sub>3</sub>]<sup>3+</sup> calc. 969.57; 1477.36 {[Pd<sub>3</sub>(L<sup>2<sup>Xy</sup></sup>)<sub>4</sub>(HCO<sub>2</sub>)<sub>4</sub>]<sup>2+</sup> calc. 1477.23.



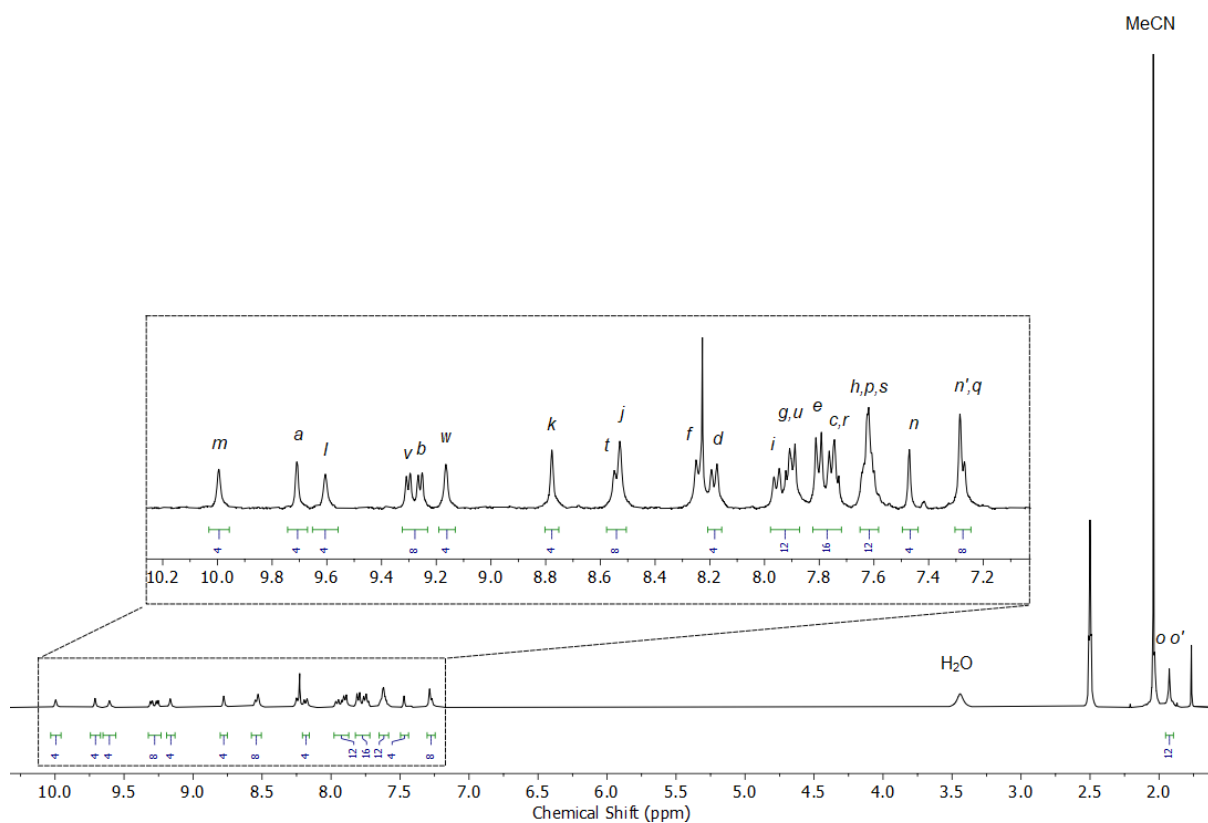

Figure S160  $^1\text{H}$  NMR (400 MHz, 3:1  $d_6$ -DMSO/ $\text{CDCl}_3$ ) of  $[\text{Pd}_3(\text{L}2^{\text{xy}})_4](\text{BF}_4)_6$ .

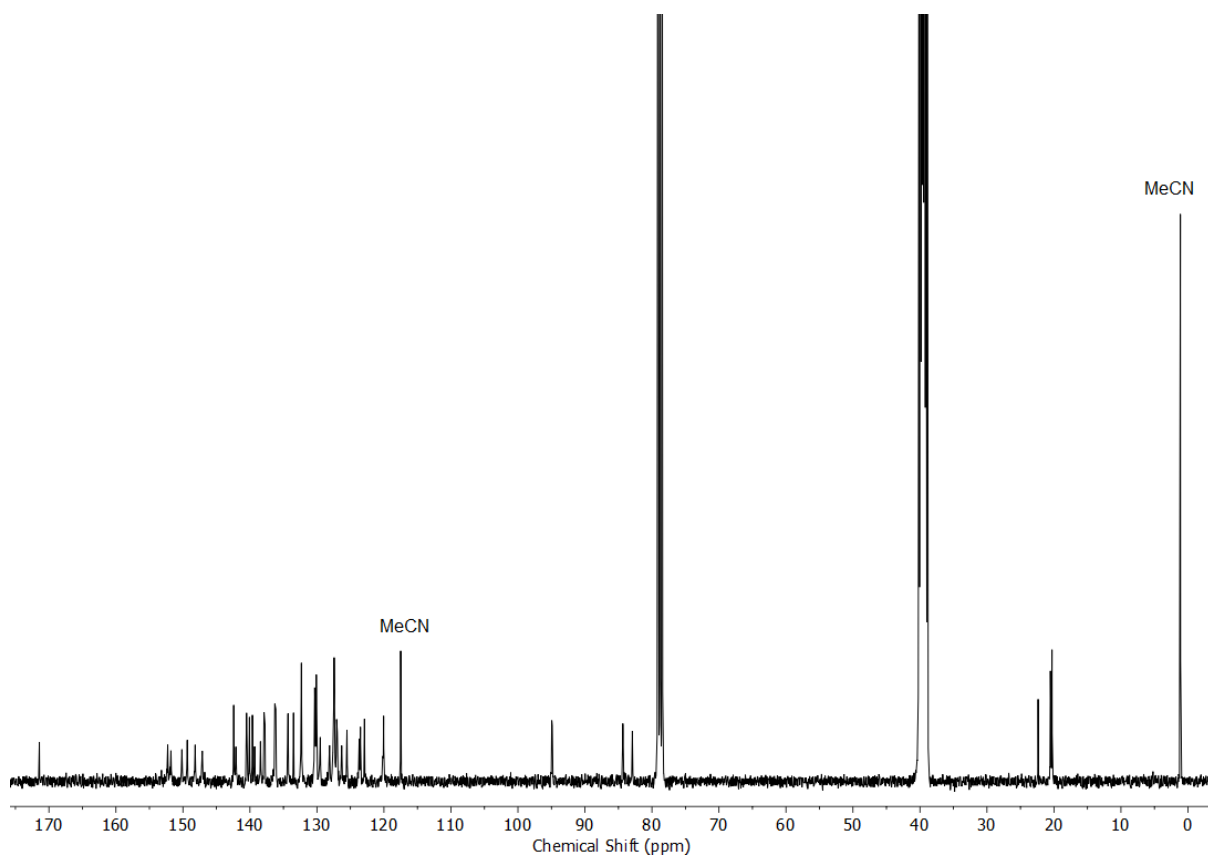

Figure S161  $^{13}\text{C}$  NMR (101 MHz, 3:1  $d_6$ -DMSO/ $\text{CDCl}_3$ ) of  $[\text{Pd}_3(\text{L}2^{\text{xy}})_4](\text{BF}_4)_6$ .

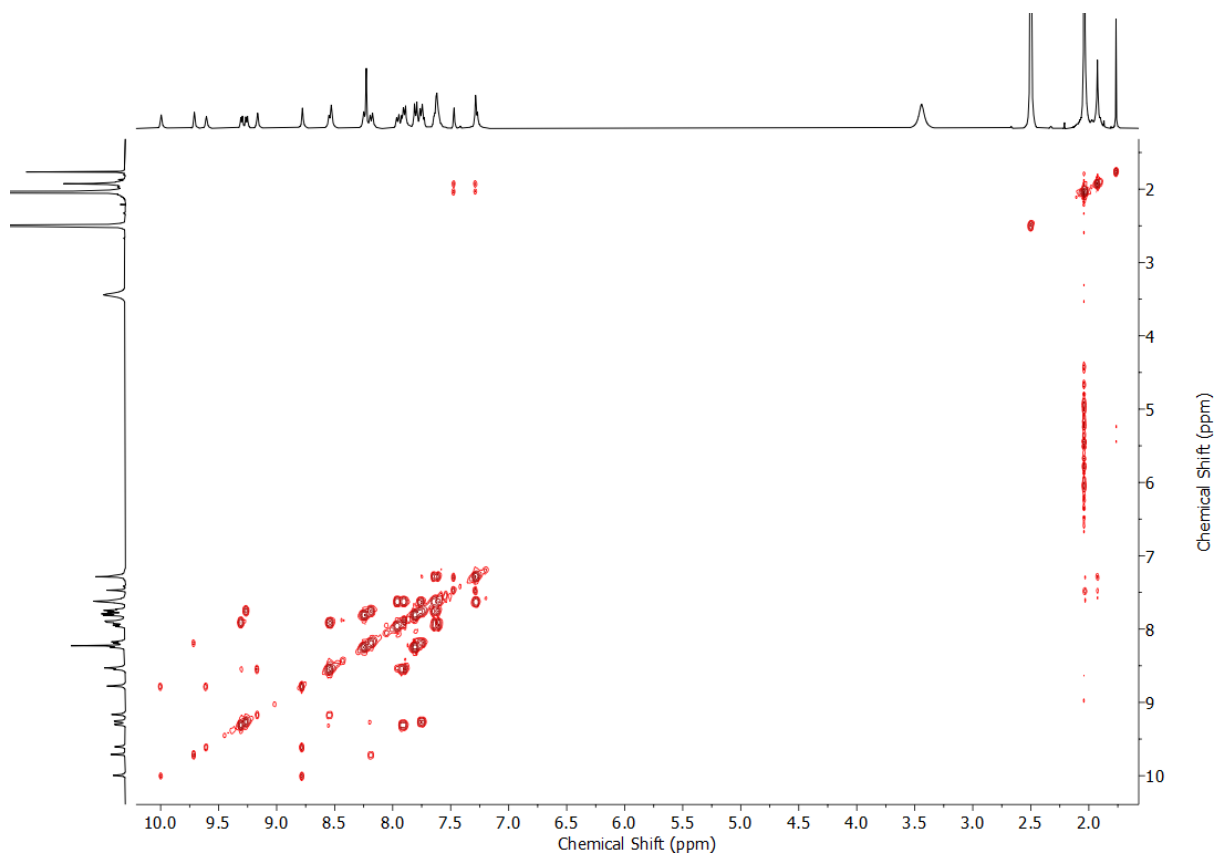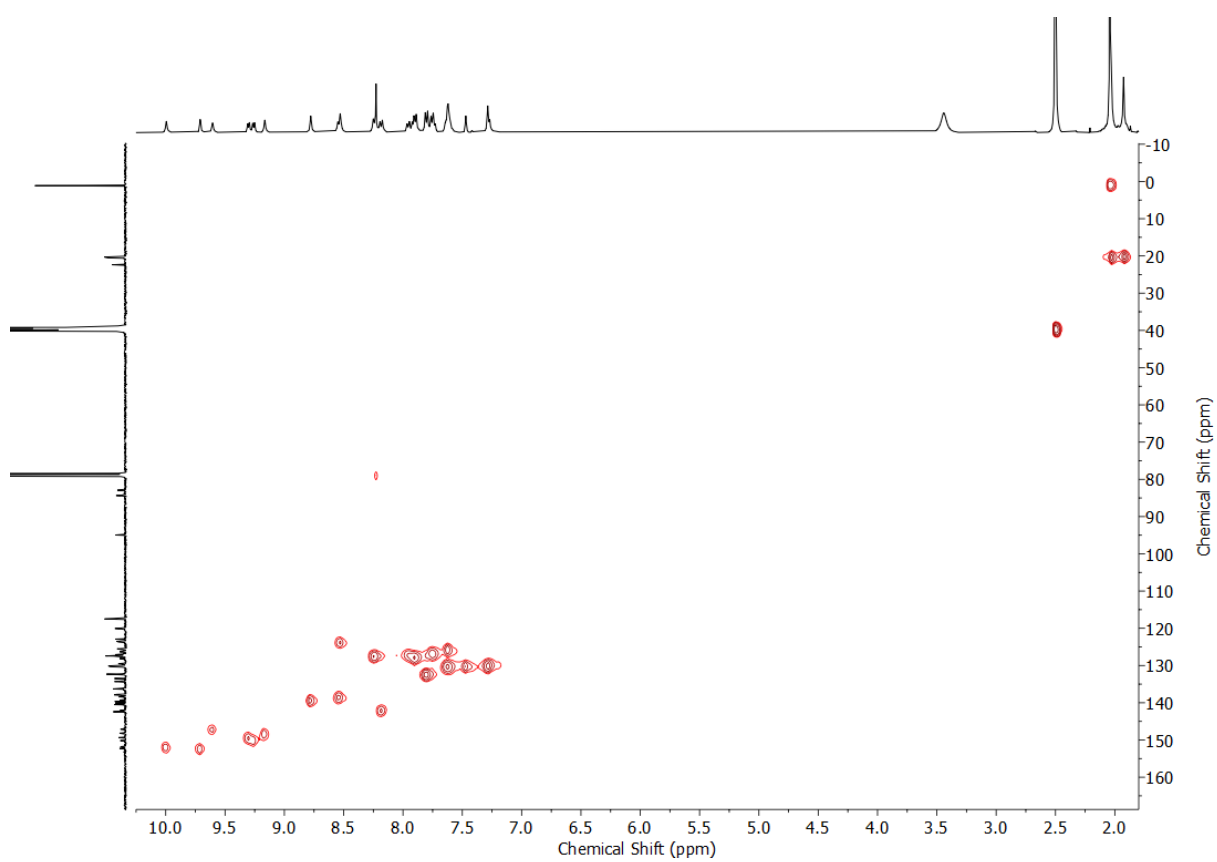

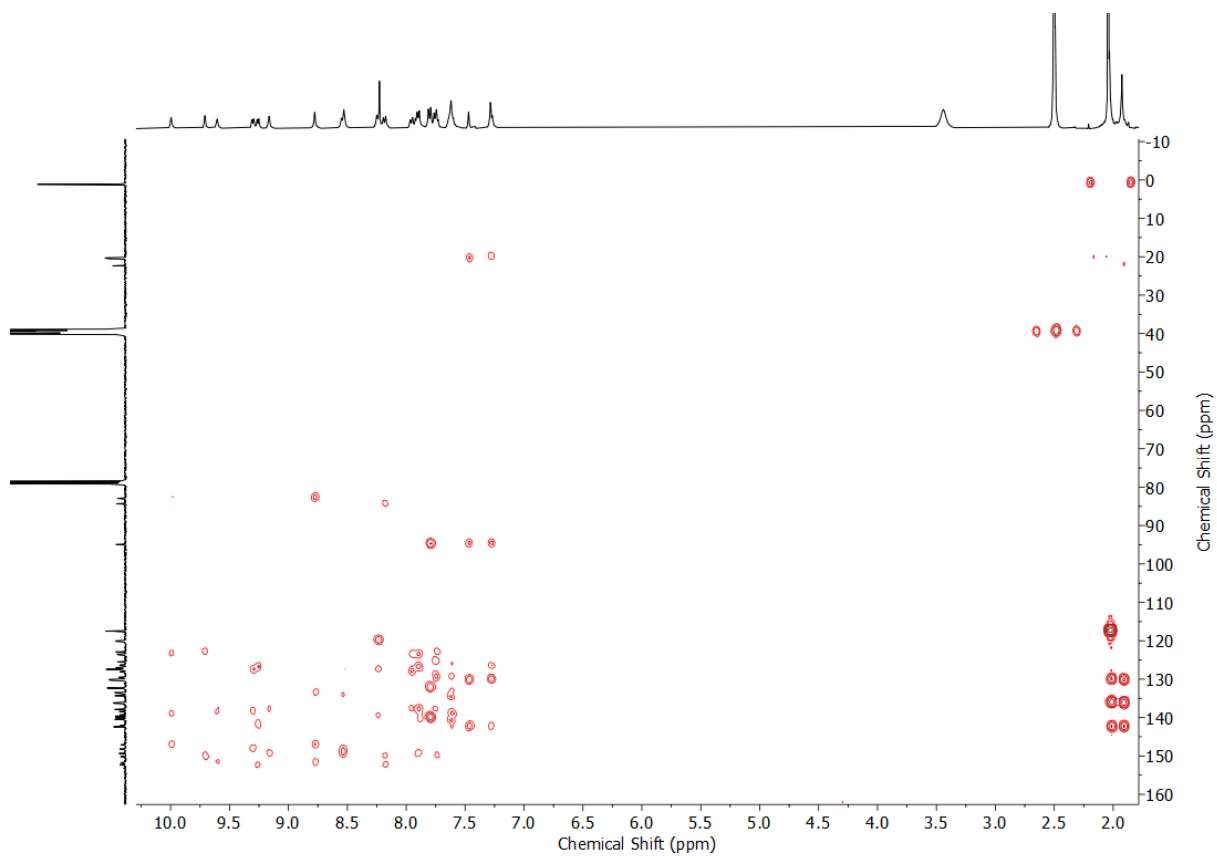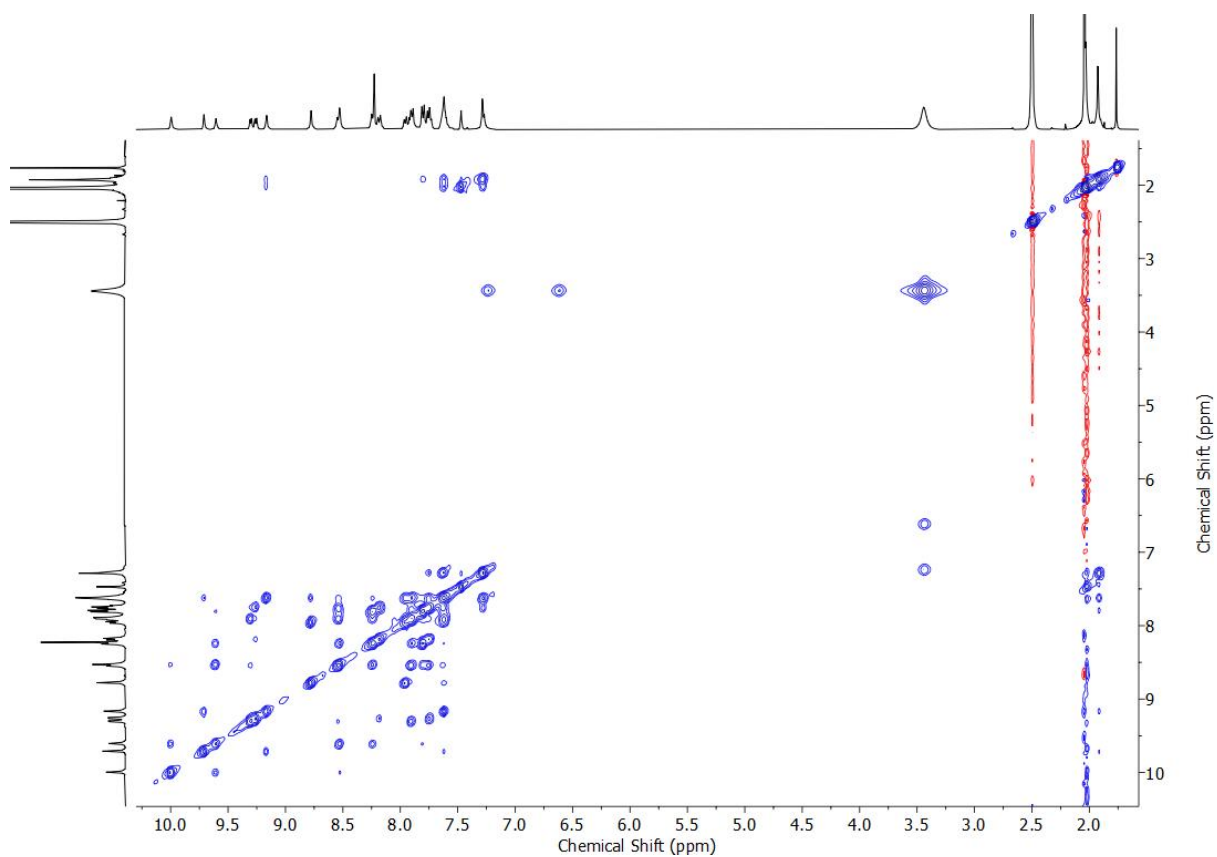

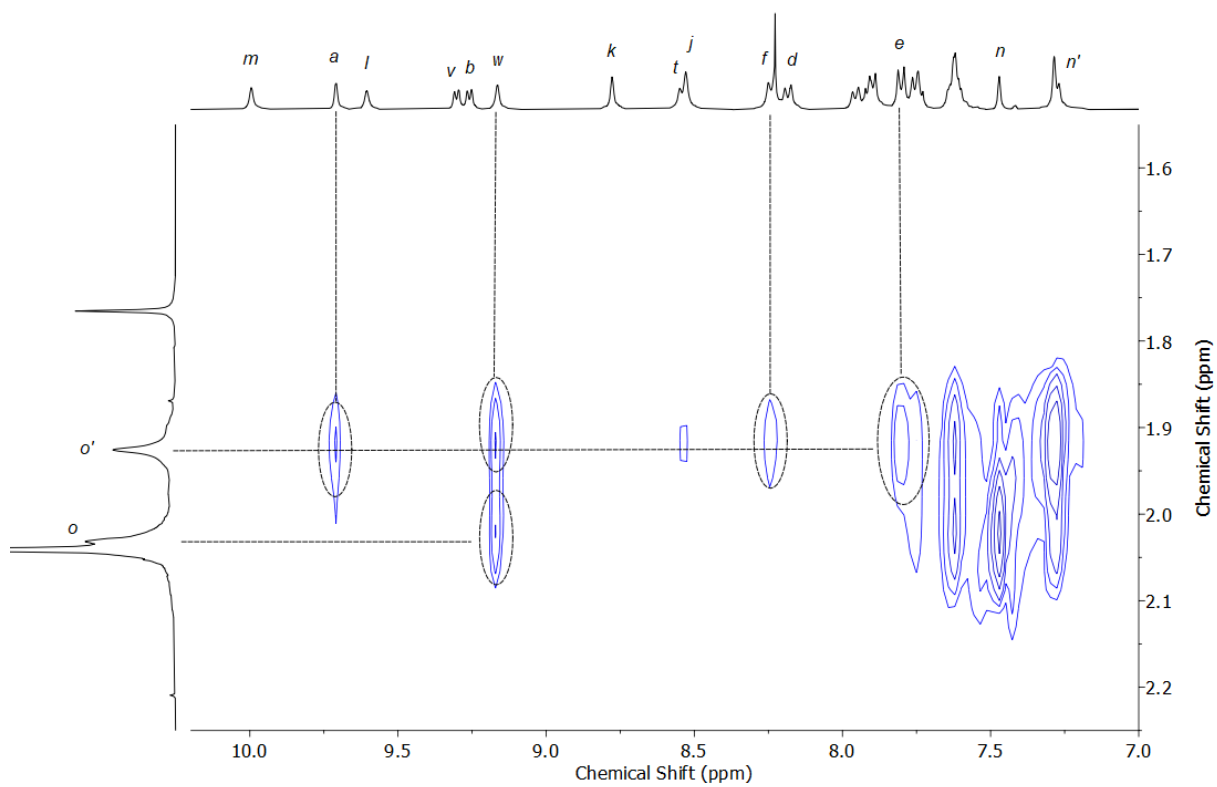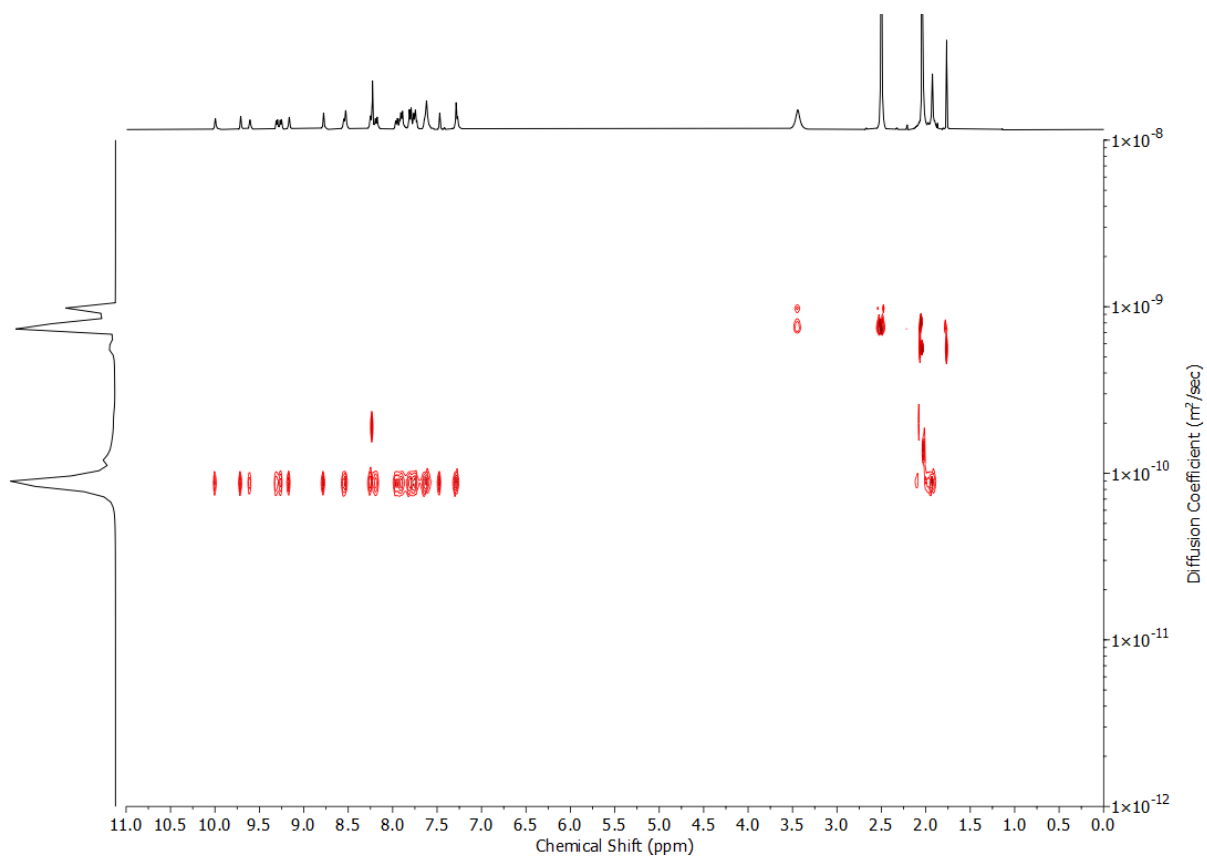

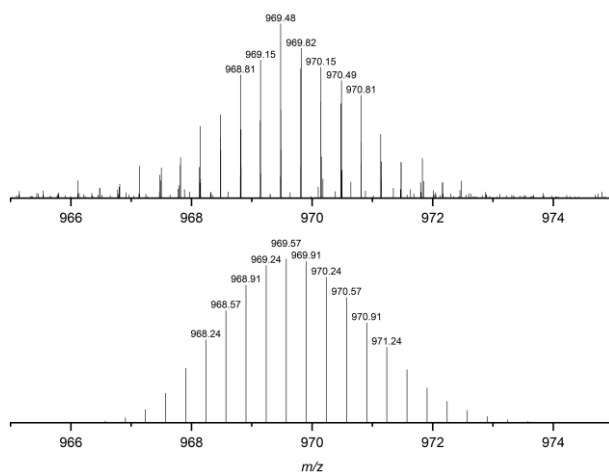

Figure S168 Observed (top) and calculated (bottom) isotopic patterns for  $\{[Pd_3(L2^{Xy})_4(HCO_2)_3]\}^{3+}$ .

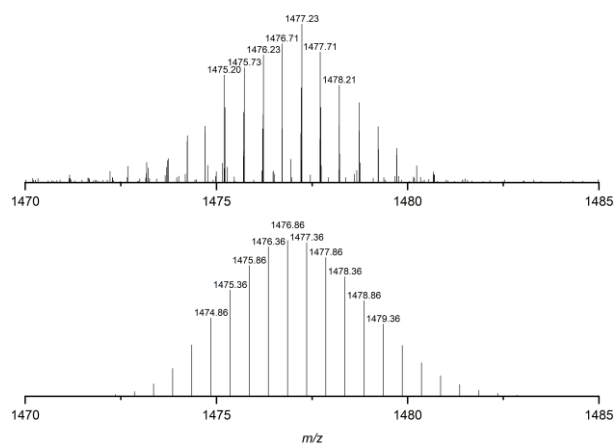

Figure S169 Observed (top) and calculated (bottom) isotopic patterns for  $\{[Pd_3(L2^{Xy})_4(HCO_2)_4]\}^{2+}$ .

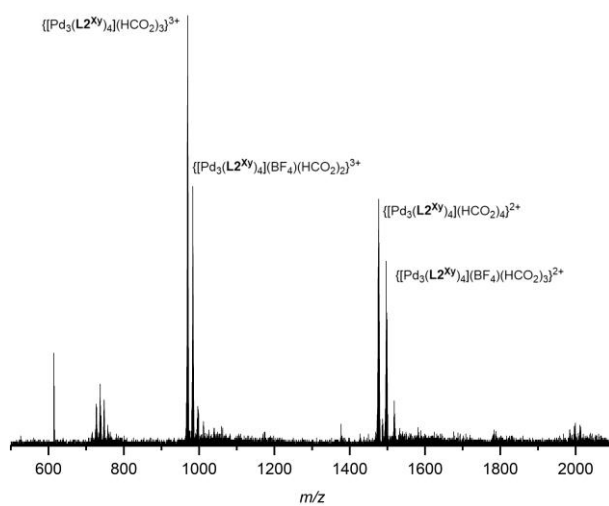

Figure S170 ESI-MS of  $[Pd_3(L2^{Xy})_4](BF_4)_6$ .

### 3. Geometry Optimised Structures

Geometry optimisations were performed using the semi-empirical method PM6<sup>[2]</sup> in Gaussian 16.<sup>[3]</sup>

C2<sup>Ph</sup>

Calculation Type = FOPT

Calculation Method = RPM6

Formula = C<sub>172</sub>H<sub>108</sub>N<sub>12</sub>Pd<sub>3</sub>

Basis Set = ZDO

Charge = 6

Spin = Singlet

Solvation = None

E(RPM6) = 3.7386819 Hartree

RMS Gradient Norm = 3.2e-08 Hartree/Bohr

Dipole Moment = 0.84660001 Debye

Point Group = C1

Molecular Mass = 2658.5924 amu

Maximum force = 0

RMS force = 0

Maximum displacement = 0.000714

RMS displacement = 8.8e-05

Predicted energy change = -3.740876e-11 Hartree

Atom coordinates:

|        |         |         |         |    |
|--------|---------|---------|---------|----|
| 1 Pd1  | -0.0000 | 0.0000  | -0.0161 | Pd |
| 2 N2   | -0.5059 | -1.3334 | 1.4511  | N  |
| 3 C3   | -1.8163 | -1.6402 | 1.6397  | C  |
| 4 C4   | 0.4288  | -1.8862 | 2.2687  | C  |
| 5 C5   | -2.2352 | -2.5471 | 2.6438  | C  |
| 6 H6   | -2.5493 | -1.1593 | 0.9786  | H  |
| 7 H7   | 1.4732  | -1.5954 | 2.0872  | H  |
| 8 C8   | -1.2581 | -3.1287 | 3.4697  | C  |
| 9 H9   | -1.5643 | -3.8504 | 4.2390  | H  |
| 10 N10 | 0.5059  | 1.3332  | 1.4512  | N  |
| 11 C11 | -0.4288 | 1.8860  | 2.2689  | C  |
| 12 C12 | 1.8163  | 1.6400  | 1.6399  | C  |
| 13 C13 | -0.0973 | 2.7888  | 3.3105  | C  |
| 14 H14 | -1.4732 | 1.5952  | 2.0874  | H  |
| 15 H15 | 2.5493  | 1.1592  | 0.9787  | H  |
| 16 C16 | 1.2581  | 3.1283  | 3.4701  | C  |
| 17 H17 | 1.5643  | 3.8499  | 4.2394  | H  |
| 18 N18 | -0.5029 | -1.3355 | -1.4782 | N  |
| 19 C19 | 0.4295  | -1.8785 | -2.3046 | C  |
| 20 C20 | -1.8112 | -1.6604 | -1.6493 | C  |
| 21 H21 | 1.4720  | -1.5714 | -2.1393 | H  |

|    |     |          |         |         |   |
|----|-----|----------|---------|---------|---|
| 22 | C22 | -2.2305  | -2.5780 | -2.6442 | C |
| 23 | H23 | -2.5432  | -1.1844 | -0.9838 | H |
| 24 | C24 | -1.2548  | -3.1503 | -3.4788 | C |
| 25 | H25 | -1.5597  | -3.8798 | -4.2406 | H |
| 26 | N26 | 0.5029   | 1.3357  | -1.4780 | N |
| 27 | C27 | 1.8112   | 1.6606  | -1.6492 | C |
| 28 | C28 | -0.4295  | 1.8788  | -2.3044 | C |
| 29 | H29 | 2.5432   | 1.1846  | -0.9837 | H |
| 30 | C30 | -0.0973  | 2.7913  | -3.3377 | C |
| 31 | H31 | -1.4720  | 1.5717  | -2.1391 | H |
| 32 | C32 | 1.2548   | 3.1507  | -3.4785 | C |
| 33 | H33 | 1.5597   | 3.8803  | -4.2402 | H |
| 34 | C34 | -1.1392  | 3.3213  | 4.2092  | C |
| 35 | C35 | -0.7959  | 3.7555  | 5.5028  | C |
| 36 | C36 | -2.4852  | 3.3804  | 3.8018  | C |
| 37 | C37 | -1.7782  | 4.2452  | 6.3677  | C |
| 38 | H38 | 0.2381   | 3.7103  | 5.8503  | H |
| 39 | C39 | -3.4716  | 3.8489  | 4.6798  | C |
| 40 | H40 | -2.7726  | 3.0786  | 2.7966  | H |
| 41 | C41 | -3.1136  | 4.2934  | 5.9643  | C |
| 42 | H42 | -1.4993  | 4.5905  | 7.3689  | H |
| 43 | H43 | -3.8794  | 4.6690  | 6.6496  | H |
| 44 | C44 | -4.8981  | 3.8485  | 4.2796  | C |
| 45 | C45 | -5.5217  | 2.6346  | 3.9410  | C |
| 46 | C46 | -5.6409  | 5.0391  | 4.2721  | C |
| 47 | C47 | -6.8743  | 2.6089  | 3.6077  | C |
| 48 | H48 | -4.9507  | 1.7078  | 3.9665  | H |
| 49 | C49 | -6.9967  | 5.0208  | 3.9384  | C |
| 50 | H50 | -5.1608  | 5.9859  | 4.5352  | H |
| 51 | C51 | -7.6213  | 3.8040  | 3.6058  | C |
| 52 | H52 | -7.3597  | 1.6650  | 3.3641  | H |
| 53 | H53 | -7.5729  | 5.9499  | 3.9448  | H |
| 54 | C54 | -9.0002  | 3.7658  | 3.2804  | C |
| 55 | C55 | -10.1770 | 3.7094  | 2.9968  | C |
| 56 | C56 | -11.5480 | 3.6546  | 2.6709  | C |
| 57 | C57 | -12.4769 | 4.5650  | 3.2214  | C |
| 58 | C58 | -12.0220 | 2.6757  | 1.7682  | C |
| 59 | C59 | -13.8182 | 4.4730  | 2.8536  | C |
| 60 | H60 | -12.1412 | 5.3329  | 3.9307  | H |
| 61 | H61 | -11.3381 | 1.9399  | 1.3256  | H |
| 62 | C62 | -14.2204 | 3.4830  | 1.9400  | C |
| 63 | H63 | -14.5594 | 5.1683  | 3.2704  | H |
| 64 | H64 | -15.2700 | 3.3937  | 1.6233  | H |
| 65 | C65 | -3.6028  | -2.8740 | -2.7714 | C |
| 66 | C66 | -4.7882  | -3.1089 | -2.8699 | C |
| 67 | C67 | -6.1813  | -3.3513 | -2.9523 | C |
| 68 | C68 | -6.7627  | -3.8181 | -4.1465 | C |
| 69 | C69 | -6.9927  | -3.1159 | -1.8232 | C |

|          |          |         |           |
|----------|----------|---------|-----------|
| 70 C70   | -8.1401  | -4.0369 | -4.2110 C |
| 71 H71   | -6.1381  | -4.0130 | -5.0218 H |
| 72 C72   | -8.3663  | -3.3357 | -1.8953 C |
| 73 H73   | -6.5436  | -2.7701 | -0.8933 H |
| 74 C74   | -8.9493  | -3.7954 | -3.0898 C |
| 75 H75   | -8.5892  | -4.4004 | -5.1403 H |
| 76 H76   | -8.9908  | -3.1701 | -1.0183 H |
| 77 C77   | -10.4093 | -4.0418 | -3.1466 C |
| 78 C78   | -11.3131 | -2.9923 | -2.9273 C |
| 79 C79   | -10.8866 | -5.3373 | -3.4049 C |
| 80 C80   | -12.6962 | -3.2396 | -2.9485 C |
| 81 H81   | -10.9354 | -1.9852 | -2.7677 H |
| 82 C82   | -12.2617 | -5.5803 | -3.4268 C |
| 83 H83   | -10.1854 | -6.1562 | -3.5858 H |
| 84 C84   | -13.1668 | -4.5408 | -3.1955 C |
| 85 H85   | -12.6339 | -6.5907 | -3.6283 H |
| 86 H86   | -14.2381 | -4.7537 | -3.2040 H |
| 87 C87   | -13.6607 | -2.1487 | -2.7046 C |
| 88 C88   | -14.8555 | -2.0458 | -3.4465 C |
| 89 C89   | -13.4236 | -1.1853 | -1.7027 C |
| 90 C90   | -15.7645 | -1.0298 | -3.1542 C |
| 91 H91   | -15.0685 | -2.7603 | -4.2533 H |
| 92 H92   | -12.5048 | -1.2126 | -1.1028 H |
| 93 C93   | -15.4705 | -0.1146 | -2.1294 C |
| 94 H94   | -16.7041 | -0.9430 | -3.7157 H |
| 95 H95   | -16.1728 | 0.6889  | -1.8633 H |
| 96 N96   | -14.3104 | -0.1867 | -1.4201 N |
| 97 N97   | -13.3344 | 2.5972  | 1.4063 N  |
| 98 C98   | -1.1345  | 3.3115  | -4.2490 C |
| 99 C99   | -2.4875  | 3.3499  | -3.8620 C |
| 100 C100 | -0.7778  | 3.7535  | -5.5363 C |
| 101 C101 | -3.4677  | 3.7951  | -4.7585 C |
| 102 H102 | -2.7862  | 3.0394  | -2.8630 H |
| 103 C103 | -1.7540  | 4.2267  | -6.4172 C |
| 104 H104 | 0.2624   | 3.7275  | -5.8664 H |
| 105 C105 | -3.0969  | 4.2448  | -6.0377 C |
| 106 H106 | -1.4644  | 4.5825  | -7.4114 H |
| 107 H107 | -3.8581  | 4.6138  | -6.7320 H |
| 108 C108 | -4.9011  | 3.7705  | -4.3833 C |
| 109 C109 | -5.7894  | 2.9663  | -5.1180 C |
| 110 C110 | -5.3819  | 4.5480  | -3.3188 C |
| 111 C111 | -7.1429  | 2.9292  | -4.7866 C |
| 112 H112 | -5.4214  | 2.3759  | -5.9599 H |
| 113 C113 | -6.7369  | 4.5187  | -2.9839 C |
| 114 H114 | -4.7007  | 5.1988  | -2.7683 H |
| 115 H115 | -7.8315  | 2.3136  | -5.3687 H |
| 116 H116 | -7.1112  | 5.1411  | -2.1696 H |
| 117 C117 | -3.6102  | -2.8277 | 2.7901 C  |



|           |          |         |           |
|-----------|----------|---------|-----------|
| 118 C118  | -4.7941  | -3.0582 | 2.9089 C  |
| 119 C119  | -6.1870  | -3.3009 | 3.0150 C  |
| 120 C120  | -6.8273  | -4.1290 | 2.0720 C  |
| 121 C121  | -6.9340  | -2.7135 | 4.0540 C  |
| 122 C122  | -8.2018  | -4.3445 | 2.1573 C  |
| 123 H123  | -6.2466  | -4.6144 | 1.2860 H  |
| 124 C124  | -8.3107  | -2.9289 | 4.1295 C  |
| 125 H125  | -6.4362  | -2.1007 | 4.8074 H  |
| 126 C126  | -8.9527  | -3.7387 | 3.1796 C  |
| 127 H127  | -8.6955  | -4.9994 | 1.4361 H  |
| 128 H128  | -8.8872  | -2.4868 | 4.9455 H  |
| 129 C129  | -10.4146 | -3.9721 | 3.2500 C  |
| 130 C130  | -11.3108 | -2.9140 | 3.0448 C  |
| 131 C131  | -10.8996 | -5.2647 | 3.5085 C  |
| 132 C132  | -12.6955 | -3.1523 | 3.0716 C  |
| 133 H133  | -10.9277 | -1.9099 | 2.8816 H  |
| 134 C134  | -12.2763 | -5.4951 | 3.5517 C  |
| 135 H135  | -10.2023 | -6.0880 | 3.6862 H  |
| 136 C136  | -13.1750 | -4.4482 | 3.3276 C  |
| 137 H137  | -12.6548 | -6.5010 | 3.7635 H  |
| 138 H138  | -14.2480 | -4.6512 | 3.3487 H  |
| 139 C139  | -13.6530 | -2.0576 | 2.8182 C  |
| 140 C140  | -14.8333 | -1.9215 | 3.5772 C  |
| 141 C141  | -13.4237 | -1.1266 | 1.7844 C  |
| 142 C142  | -15.7370 | -0.9047 | 3.2707 C  |
| 143 H143  | -15.0392 | -2.6110 | 4.4073 H  |
| 144 H144  | -12.5156 | -1.1817 | 1.1702 H  |
| 145 C145  | -15.4523 | -0.0234 | 2.2139 C  |
| 146 H146  | -16.6656 | -0.7914 | 3.8456 H  |
| 147 H147  | -16.1515 | 0.7788  | 1.9363 H  |
| 148 N148  | -14.3059 | -0.1284 | 1.4867 N  |
| 149 Pd149 | -13.8591 | 1.2001  | 0.0054 Pd |
| 150 N150  | -13.3325 | 2.5363  | -1.4537 N |
| 151 C151  | -12.0182 | 2.6086  | -1.8106 C |
| 152 C152  | -14.2228 | 3.3855  | -2.0379 C |
| 153 C153  | -11.5473 | 3.5432  | -2.7603 C |
| 154 H154  | -11.3304 | 1.9033  | -1.3265 H |
| 155 C155  | -13.8234 | 4.3308  | -2.9985 C |
| 156 H156  | -15.2736 | 3.3030  | -1.7235 H |
| 157 C157  | -12.4804 | 4.4153  | -3.3628 C |
| 158 H158  | -14.5674 | 4.9977  | -3.4546 H |
| 159 H159  | -12.1461 | 5.1492  | -4.1084 H |
| 160 C160  | -10.1749 | 3.5947  | -3.0843 C |
| 161 C161  | -8.9997  | 3.6547  | -3.3726 C |
| 162 C162  | -7.6228  | 3.7012  | -3.7105 C |
| 163 Pd163 | 13.8591  | -1.2002 | 0.0053 Pd |
| 164 N164  | 13.3343  | -2.5974 | 1.4060 N  |
| 165 C165  | 12.0220  | -2.6759 | 1.7679 C  |

|     |      |         |         |         |   |
|-----|------|---------|---------|---------|---|
| 166 | C166 | 14.2204 | -3.4833 | 1.9396  | C |
| 167 | C167 | 11.5480 | -3.6550 | 2.6705  | C |
| 168 | H168 | 11.3381 | -1.9401 | 1.3254  | H |
| 169 | C169 | 13.8182 | -4.4734 | 2.8530  | C |
| 170 | H170 | 15.2700 | -3.3940 | 1.6229  | H |
| 171 | C171 | 12.4769 | -4.5654 | 3.2209  | C |
| 172 | H172 | 14.5594 | -5.1687 | 3.2697  | H |
| 173 | H173 | 12.1412 | -5.3334 | 3.9301  | H |
| 174 | N174 | 14.3059 | 0.1282  | 1.4867  | N |
| 175 | C175 | 13.4237 | 1.1264  | 1.7845  | C |
| 176 | C176 | 15.4523 | 0.0231  | 2.2139  | C |
| 177 | C177 | 13.6531 | 2.0572  | 2.8184  | C |
| 178 | H178 | 12.5156 | 1.1815  | 1.1704  | H |
| 179 | C179 | 15.7370 | 0.9043  | 3.2708  | C |
| 180 | H180 | 16.1515 | -0.7791 | 1.9362  | H |
| 181 | C181 | 14.8334 | 1.9211  | 3.5774  | C |
| 182 | H182 | 16.6656 | 0.7909  | 3.8457  | H |
| 183 | H183 | 15.0392 | 2.6104  | 4.4076  | H |
| 184 | N184 | 13.3325 | -2.5362 | -1.4540 | N |
| 185 | C185 | 14.2227 | -3.3854 | -2.0383 | C |
| 186 | C186 | 12.0182 | -2.6084 | -1.8110 | C |
| 187 | C187 | 13.8233 | -4.3305 | -2.9990 | C |
| 188 | H188 | 15.2736 | -3.3029 | -1.7239 | H |
| 189 | C189 | 11.5473 | -3.5429 | -2.7607 | C |
| 190 | H190 | 11.3304 | -1.9031 | -1.3267 | H |
| 191 | C191 | 12.4803 | -4.4149 | -3.3633 | C |
| 192 | H192 | 14.5674 | -4.9974 | -3.4551 | H |
| 193 | H193 | 12.1460 | -5.1488 | -4.1090 | H |
| 194 | N194 | 14.3104 | 0.1868  | -1.4201 | N |
| 195 | C195 | 15.4705 | 0.1148  | -2.1294 | C |
| 196 | C196 | 13.4236 | 1.1855  | -1.7026 | C |
| 197 | C197 | 15.7645 | 1.0301  | -3.1541 | C |
| 198 | H198 | 16.1728 | -0.6887 | -1.8634 | H |
| 199 | C199 | 13.6607 | 2.1490  | -2.7044 | C |
| 200 | H200 | 12.5048 | 1.2127  | -1.1027 | H |
| 201 | C201 | 14.8555 | 2.0462  | -3.4463 | C |
| 202 | H202 | 16.7041 | 0.9434  | -3.7156 | H |
| 203 | H203 | 15.0685 | 2.7607  | -4.2530 | H |
| 204 | C204 | 12.6955 | 3.1519  | 3.0719  | C |
| 205 | C205 | 13.1750 | 4.4477  | 3.3281  | C |
| 206 | C206 | 11.3108 | 2.9137  | 3.0452  | C |
| 207 | C207 | 12.2763 | 5.4946  | 3.5523  | C |
| 208 | H208 | 14.2480 | 4.6508  | 3.3492  | H |
| 209 | C209 | 10.4146 | 3.9717  | 3.2504  | C |
| 210 | H210 | 10.9278 | 1.9095  | 2.8818  | H |
| 211 | C211 | 10.8996 | 5.2643  | 3.5091  | C |
| 212 | H212 | 12.6548 | 6.5005  | 3.7643  | H |
| 213 | H213 | 10.2023 | 6.0876  | 3.6869  | H |

|          |         |         |           |
|----------|---------|---------|-----------|
| 214 C214 | 8.9527  | 3.7383  | 3.1800 C  |
| 215 C215 | 8.3107  | 2.9284  | 4.1298 C  |
| 216 C216 | 8.2018  | 4.3442  | 2.1578 C  |
| 217 C217 | 6.9340  | 2.7130  | 4.0543 C  |
| 218 H218 | 8.8872  | 2.4862  | 4.9458 H  |
| 219 C219 | 6.8274  | 4.1288  | 2.0725 C  |
| 220 H220 | 8.6955  | 4.9993  | 1.4366 H  |
| 221 C221 | 6.1870  | 3.3005  | 3.0153 C  |
| 222 H222 | 6.4362  | 2.1002  | 4.8077 H  |
| 223 H223 | 6.2466  | 4.6142  | 1.2866 H  |
| 224 C224 | 4.7941  | 3.0579  | 2.9092 C  |
| 225 C225 | 10.1749 | -3.5943 | -3.0848 C |
| 226 C226 | 8.9997  | -3.6543 | -3.3730 C |
| 227 C227 | 7.6228  | -3.7008 | -3.7110 C |
| 228 C228 | 7.1429  | -2.9286 | -4.7870 C |
| 229 C229 | 6.7369  | -4.5184 | -2.9845 C |
| 230 C230 | 5.7894  | -2.9656 | -5.1183 C |
| 231 H231 | 7.8315  | -2.3130 | -5.3689 H |
| 232 C232 | 5.3819  | -4.5476 | -3.3194 C |
| 233 H233 | 7.1112  | -5.1409 | -2.1702 H |
| 234 C234 | 4.9011  | -3.7699 | -4.3838 C |
| 235 H235 | 5.4214  | -2.3751 | -5.9602 H |
| 236 H236 | 4.7007  | -5.1985 | -2.7690 H |
| 237 C237 | 3.4677  | -3.7945 | -4.7590 C |
| 238 C238 | 2.4875  | -3.3494 | -3.8624 C |
| 239 C239 | 3.0969  | -4.2440 | -6.0382 C |
| 240 H240 | 2.7862  | -3.0390 | -2.8633 H |
| 241 C241 | 1.7540  | -4.2258 | -6.4177 C |
| 242 H242 | 3.8580  | -4.6129 | -6.7325 H |
| 243 C243 | 0.7778  | -3.7527 | -5.5368 C |
| 244 H244 | 1.4643  | -4.5815 | -7.4120 H |
| 245 H245 | -0.2624 | -3.7267 | -5.8669 H |
| 246 C246 | 12.6962 | 3.2398  | -2.9481 C |
| 247 C247 | 11.3131 | 2.9926  | -2.9270 C |
| 248 C248 | 13.1668 | 4.5411  | -3.1950 C |
| 249 C249 | 10.4094 | 4.0421  | -3.1462 C |
| 250 H250 | 10.9354 | 1.9855  | -2.7675 H |
| 251 C251 | 12.2618 | 5.5807  | -3.4261 C |
| 252 H252 | 14.2381 | 4.7540  | -3.2035 H |
| 253 C253 | 10.8866 | 5.3376  | -3.4043 C |
| 254 H254 | 12.6340 | 6.5911  | -3.6276 H |
| 255 H255 | 10.1854 | 6.1566  | -3.5851 H |
| 256 C256 | 8.9493  | 3.7957  | -3.0894 C |
| 257 C257 | 8.1401  | 4.0374  | -4.2105 C |
| 258 C258 | 8.3663  | 3.3359  | -1.8949 C |
| 259 C259 | 6.7628  | 3.8186  | -4.1460 C |
| 260 H260 | 8.5893  | 4.4010  | -5.1398 H |
| 261 C261 | 6.9927  | 3.1161  | -1.8229 C |

|          |         |         |         |   |
|----------|---------|---------|---------|---|
| 262 H262 | 8.9908  | 3.1702  | -1.0180 | H |
| 263 H263 | 6.1382  | 4.0135  | -5.0213 | H |
| 264 H264 | 6.5436  | 2.7702  | -0.8930 | H |
| 265 C265 | 10.1770 | -3.7097 | 2.9964  | C |
| 266 C266 | 9.0002  | -3.7662 | 3.2800  | C |
| 267 C267 | 7.6213  | -3.8044 | 3.6054  | C |
| 268 C268 | 6.9967  | -5.0212 | 3.9379  | C |
| 269 C269 | 6.8743  | -2.6093 | 3.6074  | C |
| 270 C270 | 5.6409  | -5.0395 | 4.2716  | C |
| 271 H271 | 7.5729  | -5.9504 | 3.9443  | H |
| 272 C272 | 5.5217  | -2.6350 | 3.9407  | C |
| 273 H273 | 7.3597  | -1.6654 | 3.3638  | H |
| 274 C274 | 4.8981  | -3.8489 | 4.2792  | C |
| 275 H275 | 5.1608  | -5.9864 | 4.5346  | H |
| 276 H276 | 4.9507  | -1.7082 | 3.9663  | H |
| 277 C277 | 3.4716  | -3.8494 | 4.6794  | C |
| 278 C278 | 2.4852  | -3.3808 | 3.8014  | C |
| 279 C279 | 3.1136  | -4.2939 | 5.9638  | C |
| 280 H280 | 2.7726  | -3.0789 | 2.7963  | H |
| 281 C281 | 1.7782  | -4.2458 | 6.3672  | C |
| 282 H282 | 3.8794  | -4.6696 | 6.6491  | H |
| 283 C283 | 0.7959  | -3.7560 | 5.5024  | C |
| 284 H284 | 1.4993  | -4.5912 | 7.3684  | H |
| 285 H285 | -0.2380 | -3.7108 | 5.8499  | H |
| 286 C286 | 4.7882  | 3.1092  | -2.8696 | C |
| 287 C287 | 6.1813  | 3.3516  | -2.9519 | C |
| 288 C288 | 1.1344  | -3.3110 | -4.2494 | C |
| 289 C289 | 0.0973  | -2.7909 | -3.3381 | C |
| 290 C290 | 2.2352  | 2.5468  | 2.6441  | C |
| 291 C291 | 2.2305  | 2.5783  | -2.6439 | C |
| 292 C292 | 0.0973  | -2.7892 | 3.3102  | C |
| 293 C293 | 1.1392  | -3.3217 | 4.2088  | C |
| 294 C294 | 3.6028  | 2.8743  | -2.7710 | C |
| 295 C295 | 3.6102  | 2.8274  | 2.7904  | C |

C2<sup>Xy</sup>

Calculation Type = FOPT  
Calculation Method = RPM6  
Formula = C<sub>180</sub>H<sub>124</sub>N<sub>12</sub>Pd<sub>3</sub>  
Basis Set = ZDO  
Charge = 6  
Spin = Singlet  
Solvation = None  
E(RPM6) = 3.6079528 Hartree  
RMS Gradient Norm = 3e-08 Hartree/Bohr  
Dipole Moment = 2.486 Debye  
Point Group = C1  
Molecular Mass = 2770.7176 amu

Maximum force = 0  
RMS force = 0  
Maximum displacement = 5.6e-05  
RMS displacement = 9e-06  
Predicted energy change = -1.065522e-11 Hartree

Atom Coordinates:

|        |         |         |         |    |
|--------|---------|---------|---------|----|
| 1 Pd1  | -0.0000 | -0.4068 | -0.0000 | Pd |
| 2 N2   | 0.4711  | 1.0435  | -1.3602 | N  |
| 3 C3   | 1.7091  | 1.6026  | -1.3039 | C  |
| 4 C4   | -0.4015 | 1.4504  | -2.3200 | C  |
| 5 C5   | 2.1186  | 2.6015  | -2.2210 | C  |
| 6 H6   | 2.3872  | 1.2501  | -0.5160 | H  |
| 7 H7   | -1.3778 | 0.9471  | -2.3442 | H  |
| 8 C8   | 1.1962  | 3.0413  | -3.1876 | C  |
| 9 H9   | 1.4836  | 3.8417  | -3.8822 | H  |
| 10 N10 | -0.4711 | 1.0435  | 1.3602  | N  |
| 11 C11 | 0.4015  | 1.4504  | 2.3199  | C  |
| 12 C12 | -1.7091 | 1.6026  | 1.3039  | C  |
| 13 C13 | 0.0815  | 2.4615  | 3.2590  | C  |
| 14 H14 | 1.3778  | 0.9471  | 2.3442  | H  |
| 15 H15 | -2.3872 | 1.2501  | 0.5160  | H  |
| 16 C16 | -1.1962 | 3.0413  | 3.1876  | C  |
| 17 H17 | -1.4836 | 3.8417  | 3.8822  | H  |
| 18 N18 | 0.4628  | -1.8473 | -1.3636 | N  |
| 19 C19 | -0.4733 | -2.7118 | -1.8373 | C  |
| 20 C20 | 1.7451  | -1.9521 | -1.7986 | C  |
| 21 H21 | -1.4916 | -2.6029 | -1.4379 | H  |
| 22 C22 | 2.1348  | -2.9312 | -2.7472 | C  |
| 23 H23 | 2.4800  | -1.2476 | -1.3878 | H  |
| 24 C24 | 1.1540  | -3.8033 | -3.2512 | C  |
| 25 H25 | 1.4326  | -4.5486 | -4.0076 | H  |
| 26 N26 | -0.4628 | -1.8473 | 1.3636  | N  |

|        |         |         |           |
|--------|---------|---------|-----------|
| 27 C27 | -1.7451 | -1.9521 | 1.7986 C  |
| 28 C28 | 0.4733  | -2.7118 | 1.8373 C  |
| 29 H29 | -2.4800 | -1.2476 | 1.3878 H  |
| 30 C30 | 0.1711  | -3.7159 | 2.7901 C  |
| 31 H31 | 1.4916  | -2.6029 | 1.4378 H  |
| 32 C32 | -1.1540 | -3.8033 | 3.2512 C  |
| 33 H33 | -1.4326 | -4.5486 | 4.0076 H  |
| 34 C34 | 1.0538  | 2.8712  | 4.2908 C  |
| 35 C35 | 0.5978  | 3.2759  | 5.5580 C  |
| 36 C36 | 2.4350  | 2.8552  | 4.0259 C  |
| 37 C37 | 1.5103  | 3.6712  | 6.5397 C  |
| 38 H38 | -0.4681 | 3.2802  | 5.7915 H  |
| 39 C39 | 3.3495  | 3.2255  | 5.0222 C  |
| 40 H40 | 2.8050  | 2.5642  | 3.0455 H  |
| 41 C41 | 2.8814  | 3.6474  | 6.2790 C  |
| 42 H42 | 1.1483  | 4.0005  | 7.5193 H  |
| 43 H43 | 3.5891  | 3.9646  | 7.0510 H  |
| 44 C44 | 4.8072  | 3.1505  | 4.7709 C  |
| 45 C45 | 5.3839  | 3.7968  | 3.6654 C  |
| 46 C46 | 5.6237  | 2.4240  | 5.6553 C  |
| 47 C47 | 6.7567  | 3.7035  | 3.4349 C  |
| 48 H48 | 4.7607  | 4.3951  | 2.9999 H  |
| 49 C49 | 6.9965  | 2.3306  | 5.4325 C  |
| 50 H50 | 5.1838  | 1.9348  | 6.5278 H  |
| 51 C51 | 7.5698  | 2.9615  | 4.3110 C  |
| 52 H52 | 7.2061  | 4.2191  | 2.5752 H  |
| 53 H53 | 7.6275  | 1.7775  | 6.1317 H  |
| 54 C54 | 8.9626  | 2.8360  | 4.0743 C  |
| 55 C55 | 10.1491 | 2.6954  | 3.8742 C  |
| 56 C56 | 11.5311 | 2.5140  | 3.6525 C  |
| 57 C57 | 12.5052 | 3.2107  | 4.4012 C  |
| 58 C58 | 11.9683 | 1.6032  | 2.6659 C  |
| 59 C59 | 13.8548 | 2.9754  | 4.1444 C  |
| 60 H60 | 12.1972 | 3.9258  | 5.1757 H  |
| 61 H61 | 11.2449 | 1.0391  | 2.0620 H  |
| 62 C62 | 14.2221 | 2.0516  | 3.1493 C  |
| 63 H63 | 14.6313 | 3.5041  | 4.7138 H  |
| 64 H64 | 15.2800 | 1.8441  | 2.9257 H  |
| 65 C65 | 3.4897  | -3.0004 | -3.1306 C |
| 66 C66 | 4.6656  | -3.0391 | -3.4220 C |
| 67 C67 | 6.0553  | -3.0417 | -3.7192 C |
| 68 C68 | 6.7852  | -4.2378 | -3.6954 C |
| 69 C69 | 6.6927  | -1.8241 | -4.0138 C |
| 70 C70 | 8.1686  | -4.2228 | -3.9432 C |
| 71 H71 | 6.2808  | -5.1840 | -3.4965 H |
| 72 C72 | 8.0702  | -1.7996 | -4.2677 C |
| 73 H73 | 6.1135  | -0.9044 | -4.0632 H |
| 74 C74 | 8.8147  | -2.9976 | -4.2090 C |

|          |         |         |         |   |
|----------|---------|---------|---------|---|
| 75 C75   | 10.2772 | -2.9615 | -4.4510 | C |
| 76 C76   | 11.1633 | -2.7871 | -3.3780 | C |
| 77 C77   | 10.7728 | -3.0889 | -5.7590 | C |
| 78 C78   | 12.5468 | -2.7329 | -3.6154 | C |
| 79 H79   | 10.7725 | -2.7167 | -2.3663 | H |
| 80 C80   | 12.1487 | -3.0339 | -5.9899 | C |
| 81 H81   | 10.0825 | -3.2350 | -6.5935 | H |
| 82 C82   | 13.0377 | -2.8539 | -4.9255 | C |
| 83 H83   | 12.5355 | -3.1358 | -7.0092 | H |
| 84 H84   | 14.1095 | -2.8055 | -5.1259 | H |
| 85 C85   | 13.4947 | -2.5587 | -2.4966 | C |
| 86 C86   | 14.6489 | -3.3608 | -2.3940 | C |
| 87 C87   | 13.2802 | -1.5776 | -1.5061 | C |
| 88 C88   | 15.5404 | -3.1563 | -1.3409 | C |
| 89 H89   | 14.8432 | -4.1453 | -3.1382 | H |
| 90 H90   | 12.3980 | -0.9238 | -1.5408 | H |
| 91 C91   | 15.2680 | -2.1565 | -0.3936 | C |
| 92 H92   | 16.4474 | -3.7680 | -1.2507 | H |
| 93 H93   | 15.9525 | -1.9645 | 0.4453  | H |
| 94 N94   | 14.1493 | -1.3820 | -0.4725 | N |
| 95 N95   | 13.2915 | 1.3756  | 2.4216  | N |
| 96 C96   | 1.2201  | -4.6474 | 3.2479  | C |
| 97 C97   | 2.5694  | -4.2485 | 3.2797  | C |
| 98 C98   | 0.8806  | -5.9563 | 3.6332  | C |
| 99 C99   | 3.5665  | -5.1559 | 3.6615  | C |
| 100 H100 | 2.8518  | -3.2319 | 3.0149  | H |
| 101 C101 | 1.8748  | -6.8494 | 4.0431  | C |
| 102 H102 | -0.1574 | -6.2927 | 3.6102  | H |
| 103 C103 | 3.2150  | -6.4589 | 4.0536  | C |
| 104 H104 | 1.6010  | -7.8625 | 4.3556  | H |
| 105 H105 | 3.9886  | -7.1636 | 4.3730  | H |
| 106 C106 | 4.9932  | -4.7566 | 3.6261  | C |
| 107 C107 | 5.8814  | -5.4407 | 2.7787  | C |
| 108 C108 | 5.4658  | -3.7071 | 4.4294  | C |
| 109 C109 | 7.2241  | -5.0692 | 2.7185  | C |
| 110 H110 | 5.5220  | -6.2734 | 2.1702  | H |
| 111 C111 | 6.8093  | -3.3327 | 4.3773  | C |
| 112 H112 | 4.7865  | -3.1989 | 5.1155  | H |
| 113 H113 | 7.9123  | -5.6108 | 2.0666  | H |
| 114 H114 | 7.1772  | -2.5296 | 5.0172  | H |
| 115 C115 | 3.4347  | 3.1048  | -2.1676 | C |
| 116 C116 | 4.5747  | 3.5157  | -2.1463 | C |
| 117 C117 | 5.9238  | 3.9613  | -2.1132 | C |
| 118 C118 | 6.6693  | 4.0179  | -3.2996 | C |
| 119 C119 | 6.5055  | 4.3293  | -0.8888 | C |
| 120 C120 | 8.0142  | 4.4218  | -3.2671 | C |
| 121 H121 | 6.2031  | 3.7637  | -4.2519 | H |
| 122 C122 | 7.8453  | 4.7397  | -0.8468 | C |

|           |          |         |         |    |
|-----------|----------|---------|---------|----|
| 123 H123  | 5.9104   | 4.3158  | 0.0217  | H  |
| 124 C124  | 8.6090   | 4.7609  | -2.0338 | C  |
| 125 C125  | 10.0371  | 5.1565  | -1.9793 | C  |
| 126 C126  | 11.0251  | 4.1782  | -1.7991 | C  |
| 127 C127  | 10.3983  | 6.5090  | -2.0912 | C  |
| 128 C128  | 12.3769  | 4.5530  | -1.7096 | C  |
| 129 H129  | 10.7365  | 3.1318  | -1.7474 | H  |
| 130 C130  | 11.7426  | 6.8770  | -2.0103 | C  |
| 131 H131  | 9.6294   | 7.2704  | -2.2434 | H  |
| 132 C132  | 12.7318  | 5.9079  | -1.8143 | C  |
| 133 H133  | 12.0262  | 7.9311  | -2.1005 | H  |
| 134 H134  | 13.7754  | 6.2194  | -1.7374 | H  |
| 135 C135  | 13.4238  | 3.5350  | -1.4919 | C  |
| 136 C136  | 14.6711  | 3.6082  | -2.1451 | C  |
| 137 C137  | 13.2106  | 2.4635  | -0.6000 | C  |
| 138 C138  | 15.6485  | 2.6510  | -1.8755 | C  |
| 139 H139  | 14.8720  | 4.4139  | -2.8641 | H  |
| 140 H140  | 12.2535  | 2.3566  | -0.0716 | H  |
| 141 C141  | 15.3723  | 1.6202  | -0.9615 | C  |
| 142 H142  | 16.6284  | 2.7000  | -2.3680 | H  |
| 143 H143  | 16.1272  | 0.8588  | -0.7169 | H  |
| 144 N144  | 14.1652  | 1.5235  | -0.3382 | N  |
| 145 Pd145 | 13.7565  | 0.0082  | 0.9685  | Pd |
| 146 N146  | 13.2840  | -1.4873 | 2.2863  | N  |
| 147 C147  | 11.9916  | -1.9171 | 2.3553  | C  |
| 148 C148  | 14.2023  | -2.0158 | 3.1424  | C  |
| 149 C149  | 11.5701  | -2.8827 | 3.2973  | C  |
| 150 H150  | 11.2818  | -1.4815 | 1.6398  | H  |
| 151 C151  | 13.8544  | -2.9936 | 4.0902  | C  |
| 152 H152  | 15.2336  | -1.6406 | 3.0638  | H  |
| 153 C153  | 12.5330  | -3.4297 | 4.1737  | C  |
| 154 H154  | 14.6208  | -3.4058 | 4.7602  | H  |
| 155 H155  | 12.2381  | -4.1887 | 4.9107  | H  |
| 156 C156  | 10.2153  | -3.2727 | 3.3599  | C  |
| 157 C157  | 9.0555   | -3.6144 | 3.4379  | C  |
| 158 C158  | 7.6934   | -4.0039 | 3.5111  | C  |
| 159 Pd159 | -13.7565 | 0.0082  | -0.9685 | Pd |
| 160 N160  | -13.2915 | 1.3756  | -2.4216 | N  |
| 161 C161  | -11.9683 | 1.6032  | -2.6659 | C  |
| 162 C162  | -14.2221 | 2.0516  | -3.1493 | C  |
| 163 C163  | -11.5311 | 2.5140  | -3.6525 | C  |
| 164 H164  | -11.2449 | 1.0391  | -2.0620 | H  |
| 165 C165  | -13.8548 | 2.9754  | -4.1443 | C  |
| 166 H166  | -15.2800 | 1.8441  | -2.9257 | H  |
| 167 C167  | -12.5052 | 3.2107  | -4.4012 | C  |
| 168 H168  | -14.6313 | 3.5041  | -4.7138 | H  |
| 169 H169  | -12.1972 | 3.9258  | -5.1756 | H  |
| 170 N170  | -14.1652 | 1.5235  | 0.3382  | N  |



|     |      |          |         |         |   |
|-----|------|----------|---------|---------|---|
| 171 | C171 | -13.2106 | 2.4635  | 0.6000  | C |
| 172 | C172 | -15.3723 | 1.6202  | 0.9615  | C |
| 173 | C173 | -13.4238 | 3.5350  | 1.4919  | C |
| 174 | H174 | -12.2535 | 2.3566  | 0.0716  | H |
| 175 | C175 | -15.6485 | 2.6510  | 1.8756  | C |
| 176 | H176 | -16.1272 | 0.8588  | 0.7169  | H |
| 177 | C177 | -14.6711 | 3.6082  | 2.1451  | C |
| 178 | H178 | -16.6284 | 2.7000  | 2.3680  | H |
| 179 | H179 | -14.8720 | 4.4139  | 2.8641  | H |
| 180 | N180 | -13.2840 | -1.4873 | -2.2863 | N |
| 181 | C181 | -14.2023 | -2.0158 | -3.1424 | C |
| 182 | C182 | -11.9916 | -1.9171 | -2.3553 | C |
| 183 | C183 | -13.8544 | -2.9936 | -4.0902 | C |
| 184 | H184 | -15.2336 | -1.6406 | -3.0638 | H |
| 185 | C185 | -11.5701 | -2.8827 | -3.2973 | C |
| 186 | H186 | -11.2817 | -1.4815 | -1.6398 | H |
| 187 | C187 | -12.5330 | -3.4297 | -4.1737 | C |
| 188 | H188 | -14.6208 | -3.4058 | -4.7602 | H |
| 189 | H189 | -12.2381 | -4.1887 | -4.9107 | H |
| 190 | N190 | -14.1493 | -1.3820 | 0.4725  | N |
| 191 | C191 | -15.2680 | -2.1565 | 0.3936  | C |
| 192 | C192 | -13.2802 | -1.5776 | 1.5061  | C |
| 193 | C193 | -15.5404 | -3.1563 | 1.3409  | C |
| 194 | H194 | -15.9525 | -1.9645 | -0.4453 | H |
| 195 | C195 | -13.4947 | -2.5587 | 2.4966  | C |
| 196 | H196 | -12.3980 | -0.9238 | 1.5408  | H |
| 197 | C197 | -14.6489 | -3.3608 | 2.3940  | C |
| 198 | H198 | -16.4474 | -3.7680 | 1.2507  | H |
| 199 | H199 | -14.8432 | -4.1453 | 3.1382  | H |
| 200 | C200 | -12.3769 | 4.5530  | 1.7096  | C |
| 201 | C201 | -12.7318 | 5.9078  | 1.8143  | C |
| 202 | C202 | -11.0252 | 4.1782  | 1.7991  | C |
| 203 | C203 | -11.7426 | 6.8770  | 2.0103  | C |
| 204 | H204 | -13.7754 | 6.2194  | 1.7375  | H |
| 205 | C205 | -10.0371 | 5.1564  | 1.9793  | C |
| 206 | H206 | -10.7365 | 3.1318  | 1.7474  | H |
| 207 | C207 | -10.3983 | 6.5090  | 2.0913  | C |
| 208 | H208 | -12.0262 | 7.9311  | 2.1006  | H |
| 209 | H209 | -9.6294  | 7.2704  | 2.2435  | H |
| 210 | C210 | -8.6090  | 4.7609  | 2.0338  | C |
| 211 | C211 | -7.8453  | 4.7397  | 0.8468  | C |
| 212 | C212 | -8.0142  | 4.4217  | 3.2671  | C |
| 213 | C213 | -6.5055  | 4.3293  | 0.8888  | C |
| 214 | C214 | -6.6693  | 4.0179  | 3.2996  | C |
| 215 | C215 | -5.9238  | 3.9613  | 2.1132  | C |
| 216 | H216 | -5.9104  | 4.3158  | -0.0217 | H |
| 217 | H217 | -6.2031  | 3.7636  | 4.2519  | H |
| 218 | C218 | -4.5747  | 3.5157  | 2.1463  | C |

|     |      |          |         |         |   |
|-----|------|----------|---------|---------|---|
| 219 | C219 | -10.2153 | -3.2727 | -3.3599 | C |
| 220 | C220 | -9.0555  | -3.6144 | -3.4379 | C |
| 221 | C221 | -7.6934  | -4.0039 | -3.5111 | C |
| 222 | C222 | -7.2241  | -5.0692 | -2.7185 | C |
| 223 | C223 | -6.8093  | -3.3327 | -4.3774 | C |
| 224 | C224 | -5.8814  | -5.4407 | -2.7787 | C |
| 225 | H225 | -7.9123  | -5.6107 | -2.0666 | H |
| 226 | C226 | -5.4658  | -3.7071 | -4.4294 | C |
| 227 | H227 | -7.1772  | -2.5296 | -5.0172 | H |
| 228 | C228 | -4.9932  | -4.7566 | -3.6261 | C |
| 229 | H229 | -5.5220  | -6.2734 | -2.1702 | H |
| 230 | H230 | -4.7865  | -3.1989 | -5.1155 | H |
| 231 | C231 | -3.5665  | -5.1559 | -3.6615 | C |
| 232 | C232 | -2.5694  | -4.2485 | -3.2797 | C |
| 233 | C233 | -3.2150  | -6.4589 | -4.0536 | C |
| 234 | H234 | -2.8518  | -3.2319 | -3.0149 | H |
| 235 | C235 | -1.8748  | -6.8493 | -4.0432 | C |
| 236 | H236 | -3.9886  | -7.1636 | -4.3730 | H |
| 237 | C237 | -0.8806  | -5.9563 | -3.6332 | C |
| 238 | H238 | -1.6010  | -7.8625 | -4.3557 | H |
| 239 | H239 | 0.1574   | -6.2927 | -3.6103 | H |
| 240 | C240 | -12.5468 | -2.7329 | 3.6154  | C |
| 241 | C241 | -11.1633 | -2.7871 | 3.3780  | C |
| 242 | C242 | -13.0377 | -2.8539 | 4.9255  | C |
| 243 | C243 | -10.2772 | -2.9615 | 4.4510  | C |
| 244 | H244 | -10.7725 | -2.7167 | 2.3663  | H |
| 245 | C245 | -12.1487 | -3.0339 | 5.9899  | C |
| 246 | H246 | -14.1095 | -2.8055 | 5.1259  | H |
| 247 | C247 | -10.7728 | -3.0889 | 5.7590  | C |
| 248 | H248 | -12.5355 | -3.1358 | 7.0092  | H |
| 249 | H249 | -10.0825 | -3.2350 | 6.5935  | H |
| 250 | C250 | -8.8147  | -2.9976 | 4.2090  | C |
| 251 | C251 | -8.1686  | -4.2228 | 3.9432  | C |
| 252 | C252 | -8.0702  | -1.7996 | 4.2676  | C |
| 253 | C253 | -6.7852  | -4.2378 | 3.6954  | C |
| 254 | C254 | -6.6927  | -1.8241 | 4.0138  | C |
| 255 | H255 | -6.2808  | -5.1840 | 3.4965  | H |
| 256 | H256 | -6.1135  | -0.9044 | 4.0632  | H |
| 257 | C257 | -10.1491 | 2.6954  | -3.8742 | C |
| 258 | C258 | -8.9626  | 2.8360  | -4.0743 | C |
| 259 | C259 | -7.5698  | 2.9615  | -4.3110 | C |
| 260 | C260 | -6.9965  | 2.3306  | -5.4325 | C |
| 261 | C261 | -6.7567  | 3.7035  | -3.4349 | C |
| 262 | C262 | -5.6237  | 2.4240  | -5.6553 | C |
| 263 | H263 | -7.6275  | 1.7776  | -6.1317 | H |
| 264 | C264 | -5.3839  | 3.7968  | -3.6654 | C |
| 265 | H265 | -7.2061  | 4.2191  | -2.5751 | H |
| 266 | C266 | -4.8072  | 3.1505  | -4.7709 | C |

|     |      |         |         |         |   |
|-----|------|---------|---------|---------|---|
| 267 | H267 | -5.1838 | 1.9348  | -6.5278 | H |
| 268 | H268 | -4.7607 | 4.3952  | -2.9999 | H |
| 269 | C269 | -3.3495 | 3.2256  | -5.0222 | C |
| 270 | C270 | -2.4350 | 2.8552  | -4.0259 | C |
| 271 | C271 | -2.8814 | 3.6474  | -6.2790 | C |
| 272 | H272 | -2.8050 | 2.5642  | -3.0455 | H |
| 273 | C273 | -1.5103 | 3.6712  | -6.5397 | C |
| 274 | H274 | -3.5891 | 3.9646  | -7.0510 | H |
| 275 | C275 | -0.5978 | 3.2759  | -5.5580 | C |
| 276 | H276 | -1.1483 | 4.0005  | -7.5193 | H |
| 277 | H277 | 0.4681  | 3.2802  | -5.7915 | H |
| 278 | C278 | -4.6656 | -3.0391 | 3.4220  | C |
| 279 | C279 | -6.0553 | -3.0417 | 3.7192  | C |
| 280 | C280 | -1.2201 | -4.6474 | -3.2479 | C |
| 281 | C281 | -0.1711 | -3.7159 | -2.7901 | C |
| 282 | C282 | -2.1186 | 2.6014  | 2.2210  | C |
| 283 | C283 | -2.1348 | -2.9312 | 2.7472  | C |
| 284 | C284 | -0.0815 | 2.4616  | -3.2590 | C |
| 285 | C285 | -1.0538 | 2.8712  | -4.2908 | C |
| 286 | C286 | -3.4897 | -3.0004 | 3.1306  | C |
| 287 | C287 | -3.4347 | 3.1048  | 2.1676  | C |
| 288 | C288 | 8.9292  | -5.5035 | -3.9432 | C |
| 289 | H289 | 9.1511  | -5.8272 | -4.9768 | H |
| 290 | H290 | 9.8995  | -5.4229 | -3.4319 | H |
| 291 | H291 | 8.3855  | -6.3348 | -3.4727 | H |
| 292 | C292 | 8.7287  | -0.5077 | -4.6232 | C |
| 293 | H293 | 8.9003  | -0.4544 | -5.7137 | H |
| 294 | H294 | 8.1282  | 0.3707  | -4.3561 | H |
| 295 | H295 | 9.7132  | -0.3926 | -4.1501 | H |
| 296 | C296 | 8.7878  | 4.5085  | -4.5372 | C |
| 297 | H297 | 9.8057  | 4.1025  | -4.4450 | H |
| 298 | H298 | 8.3074  | 3.9913  | -5.3791 | H |
| 299 | H299 | 8.9056  | 5.5623  | -4.8514 | H |
| 300 | C300 | 8.4386  | 5.1771  | 0.4507  | C |
| 301 | H301 | 9.4852  | 4.8637  | 0.5670  | H |
| 302 | H302 | 8.4390  | 6.2809  | 0.5179  | H |
| 303 | H303 | 7.8826  | 4.8084  | 1.3302  | H |
| 304 | C304 | -8.9292 | -5.5035 | 3.9432  | C |
| 305 | H305 | -9.1510 | -5.8272 | 4.9768  | H |
| 306 | H306 | -9.8995 | -5.4229 | 3.4319  | H |
| 307 | H307 | -8.3855 | -6.3348 | 3.4726  | H |
| 308 | C308 | -8.7287 | -0.5077 | 4.6232  | C |
| 309 | H309 | -9.7131 | -0.3926 | 4.1501  | H |
| 310 | H310 | -8.9004 | -0.4544 | 5.7137  | H |
| 311 | H311 | -8.1282 | 0.3707  | 4.3561  | H |
| 312 | C312 | -8.7878 | 4.5085  | 4.5372  | C |
| 313 | H313 | -9.8057 | 4.1025  | 4.4450  | H |
| 314 | H314 | -8.3073 | 3.9913  | 5.3791  | H |

|          |         |        |           |
|----------|---------|--------|-----------|
| 315 H315 | -8.9057 | 5.5623 | 4.8514 H  |
| 316 C316 | -8.4386 | 5.1772 | -0.4507 C |
| 317 H317 | -9.4852 | 4.8637 | -0.5669 H |
| 318 H318 | -8.4390 | 6.2809 | -0.5179 H |
| 319 H319 | -7.8826 | 4.8085 | -1.3302 H |

#### 4. Hydrodynamic Radii Calculations

Hydrodynamic radii were calculated using a variation of the Stokes-Einstein equation:

$$R_H = \frac{k_B T}{6\pi\eta D}$$

Where  $R_H$  is the hydrodynamic radius (m)

$k_B$  is the Boltzmann constant ( $1.38 \times 10^{-23} \text{ J K}^{-1}$ )

$T$  is the temperature (K)

$\eta$  is the solvent viscosity ( $2.180 \times 10^{-3} \text{ kg s}^{-1}\text{m}^{-1}$  for  $d_6$ -DMSO)<sup>[4]</sup>

$D$  is the diffusion coefficient ( $\text{m}^2\text{s}^{-1}$ )

## 5. X-ray Crystallography

### *cis*-[Pd<sub>2</sub>(L1<sup>xy</sup>)<sub>4</sub>](BF<sub>4</sub>)<sub>4</sub>

L1<sup>xy</sup> (10.8 mg, 30 μmol) and [Pd(CH<sub>3</sub>CN)<sub>4</sub>](BF<sub>4</sub>)<sub>2</sub> (6.7 mg, 15 μmol) were sonicated in DMF (1 mL) until a homogenous solution was obtained. After standing at rt for 24 h, the solution was diluted with additional DMF (1 mL), filtered through celite and left for vapour diffusion of Et<sub>2</sub>O, from which X-ray quality crystals were obtained.

*Crystal data for C1<sup>xy</sup>*: [C<sub>104</sub>H<sub>80</sub>N<sub>8</sub>Pd<sub>2</sub>](BF<sub>4</sub>)<sub>4</sub>·6.75(C<sub>3</sub>H<sub>7</sub>NO), *M* = 2495.19, triclinic, *P*-1 (no. 2), *a* = 12.7020(6), *b* = 22.5260(12), *c* = 23.6140(12) Å, α = 112.784(5), β = 101.482(4), γ = 94.081(4)°, *V* = 6021.9(6) Å<sup>3</sup>, *Z* = 2 [two independent *C*<sub>1</sub>-symmetric complexes], *D*<sub>c</sub> = 1.376 g cm<sup>-3</sup>, μ(Cu-Kα) = 3.135 mm<sup>-1</sup>, *T* = 173 K, colourless plates, Agilent Xcalibur PX Ultra A diffractometer; 22923 independent measured reflections (*R*<sub>int</sub> = 0.0772), *F*<sup>2</sup> refinement,<sup>[5,6,7]</sup> *R*<sub>1</sub>(obs) = 0.0890, *wR*<sub>2</sub>(all) = 0.2920, 12546 independent observed absorption-corrected reflections [|*F*<sub>o</sub>| > 4σ(|*F*<sub>o</sub>|)], completeness to θ<sub>full</sub>(67.7°) = 98.3%, 1299 parameters. CCDC 2202606.

The structure of C1<sup>xy</sup> was found to contain two independent complexes (C1<sup>xy</sup>-A and C1<sup>xy</sup>-B) both of which sit across a centre of symmetry at the middle of the cage. The four unique tetrafluoroborate anions were each found to be disordered. In each case two orientations were identified (of *ca.* 69:31, 76:24, 71:29 and 60:40% occupancy for the B60-, B70-, B80-, and B90-based BF<sub>4</sub> anions respectively), the geometries of each pair of orientations were optimised, the thermal parameters of adjacent atoms were restrained to be similar, and only the atoms of the major occupancy orientations were refined anisotropically (those of the minor occupancy orientations were refined isotropically). The included solvent was found to be highly disordered, and the best approach to handling this diffuse electron density was found to be the SQUEEZE routine of PLATON.<sup>[8]</sup> This suggested a total of 537 electrons per unit cell, equivalent to 268.5 electrons per complex. Before the use of SQUEEZE the solvent clearly resembled dimethylformamide (C<sub>3</sub>H<sub>7</sub>NO, 40 electrons), and 6.75 dimethylformamide molecules corresponds to 270 electrons, so this was used as the solvent present. As a result, the atom list for the asymmetric unit is low by 6.75(C<sub>3</sub>H<sub>7</sub>NO) = C<sub>20.25</sub>H<sub>47.25</sub>N<sub>6.75</sub>O<sub>6.75</sub> (and that for the unit cell low by C<sub>40.5</sub>H<sub>94.5</sub>N<sub>13.5</sub>O<sub>13.5</sub>) compared to what is actually presumed to be present. The two largest residual electron density peaks (Q1 and Q2 of 2.22 and 2.17 eÅ<sup>-3</sup> respectively), are both less than 1 Å away from palladium atoms. Three of the next four peaks (Q3, Q4 and Q6 of 1.37, 1.01 and 0.85 eÅ<sup>-3</sup> respectively) are similarly within *ca.* 1.2 Å of the palladium centres. These peaks are not in chemically sensible positions, and so are highly likely to be artefacts related to residual absorption effects.

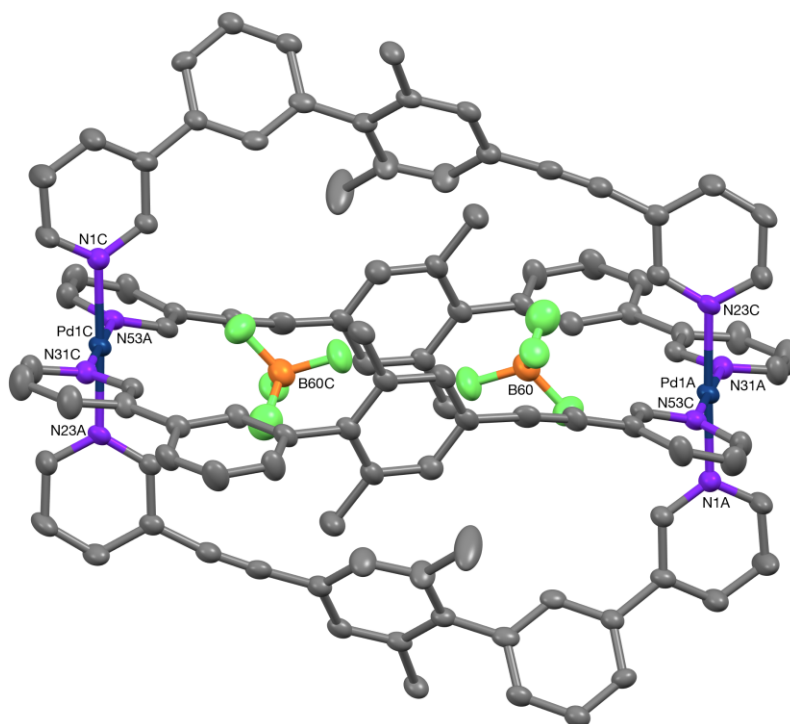

Figure S171 The structure of the  $C_1$ -symmetric complex  $C1^{xy}$ -A, one of the two independent complexes present in the crystal of  $C1^{xy}$ , showing the encapsulated tetrafluoroborate anions (20% probability ellipsoids).

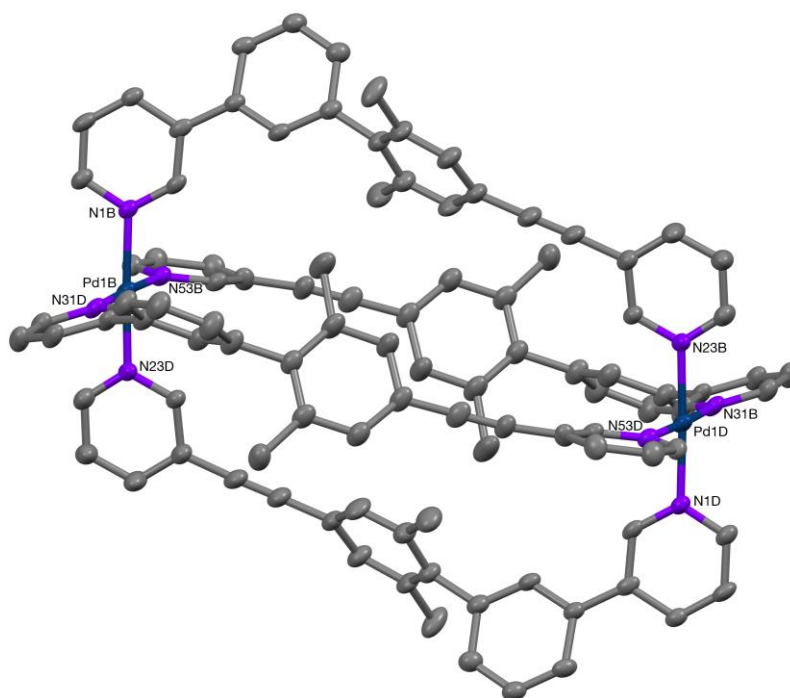

Figure S172 The structure of the  $C_1$ -symmetric complex  $C1^{xy}$ -B, one of the two independent complexes present in the crystal of  $C1^{xy}$  (20% probability ellipsoids).

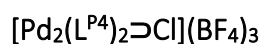

$\text{L}^{\text{P4}}$  (11.0 mg, 20  $\mu\text{mol}$ ),  $[\text{Pd}(\text{CH}_3\text{CN})_4](\text{BF}_4)_2$  (8.9 mg, 20  $\mu\text{mol}$ ) and  $\text{Bu}_4\text{NCl}$  (2.8 mg, 10  $\mu\text{mol}$ ) were sonicated in  $d_6$ -DMSO (0.75 mL) until a homogenous solution was obtained. After standing at rt for 2 d the solution was diluted with DMF (0.75 mL), filtered through celite and left vapour diffusion of  $\text{Et}_2\text{O}$ . After 5 d the mother liquor was decanted off and the yellow precipitate washed with  $\text{Et}_2\text{O}$  before drying in air. This was dissolved in DMF, filtered through celite and left for vapour diffusion of  $\text{Et}_2\text{O}$ , from which X-ray quality crystals were obtained.

*Crystal data for  $\mathbf{C}^{\text{P4}}$* :  $[\text{C}_{68}\text{H}_{44}\text{N}_8\text{O}_8\text{Pd}_2](\text{BF}_4)_3(\text{Cl})\cdot 5(\text{C}_2\text{H}_6\text{OS})$ ,  $M = 2000.43$ , monoclinic,  $P2/n$  (no. 13),  $a = 11.8232(6)$ ,  $b = 15.259(4)$ ,  $c = 28.9453(18)$  Å,  $\beta = 98.438(5)^\circ$ ,  $V = 5165.6(13)$  Å<sup>3</sup>,  $Z = 2$  [ $C_2$  symmetry],  $D_c = 1.286$  g cm<sup>-3</sup>,  $\mu(\text{Cu-K}\alpha) = 4.646$  mm<sup>-1</sup>,  $T = 173$  K, pale yellow platy needles, Agilent Xcalibur PX Ultra A diffractometer; 9828 independent measured reflections ( $R_{\text{int}} = 0.0707$ ),  $F^2$  refinement,<sup>[5,6,7]</sup>  $R_1(\text{obs}) = 0.1117$ ,  $wR_2(\text{all}) = 0.3999$ , 3162 independent observed absorption-corrected reflections [ $|F_o| > 4\sigma(|F_o|)$ ], completeness to  $\theta_{\text{full}}(67.7^\circ) = 97.9\%$ ], 393 parameters. CCDC 2202605.

The structure of  $\mathbf{C}^{\text{P4}}$  was found to sit across a  $C_2$  axis that passes through the encapsulated chloride anion Cl1, and bisects the O33...O33A vector. The crystal that was studied was a weak scatterer, the full data set having a mean  $I/\sigma$  of only 2.27 for a 15 hour data collection designed for only the symmetry unique data. The drop-off of intensity with resolution is quite rapid, with the mean  $F^2/\sigma(F^2)$  already dropping below 2 past *ca.* 1.25 Å. This suggests significant disorder, so it was not surprising that both the presumed tetrafluoroborate anions and the included solvent were found to be highly disordered. The best approach to handling this diffuse electron density was found to be the SQUEEZE routine of PLATON.<sup>[8]</sup> (Before the use of SQUEEZE, only two partial occupancy tetrafluoroborate anion sites could be identified amongst the extensive presumed disordered solvent peaks, and these did not refine in a sensible manner.) This suggested a total of 688 electrons per unit cell, equivalent to 344 electrons per complex. Accounting for the electron density of the presumed three tetrafluoroborate anions per complex ( $\text{BF}_4$ , 41 electrons, the Cl1 chlorine atom located at the middle of the cage providing the fourth negative charge required for charge balance) leaves  $344 - (4 \times 41) = 221$  electrons for the solvent. With the refinements from before the use of SQUEEZE giving no clear indication as to the identity of the solvent, the most recently used solvent (dmsO,  $\text{C}_2\text{H}_6\text{SO}$ , 42 electrons) was assumed; 5 dimethylsulphoxide molecules corresponds to 210 electrons, so this was used as the solvent present. As a result, the atom list for the asymmetric unit is low by  $0.5 \times [3(\text{BF}_4) + 5(\text{C}_2\text{H}_6\text{SO})] = \text{C}_5\text{H}_{15}\text{B}_{1.5}\text{F}_6\text{O}_{2.5}\text{S}_{2.5}$  (and that for the unit cell low by  $\text{C}_{20}\text{H}_{60}\text{B}_6\text{F}_{24}\text{O}_{10}\text{S}_{10}$ ) compared to what is actually presumed to be present.



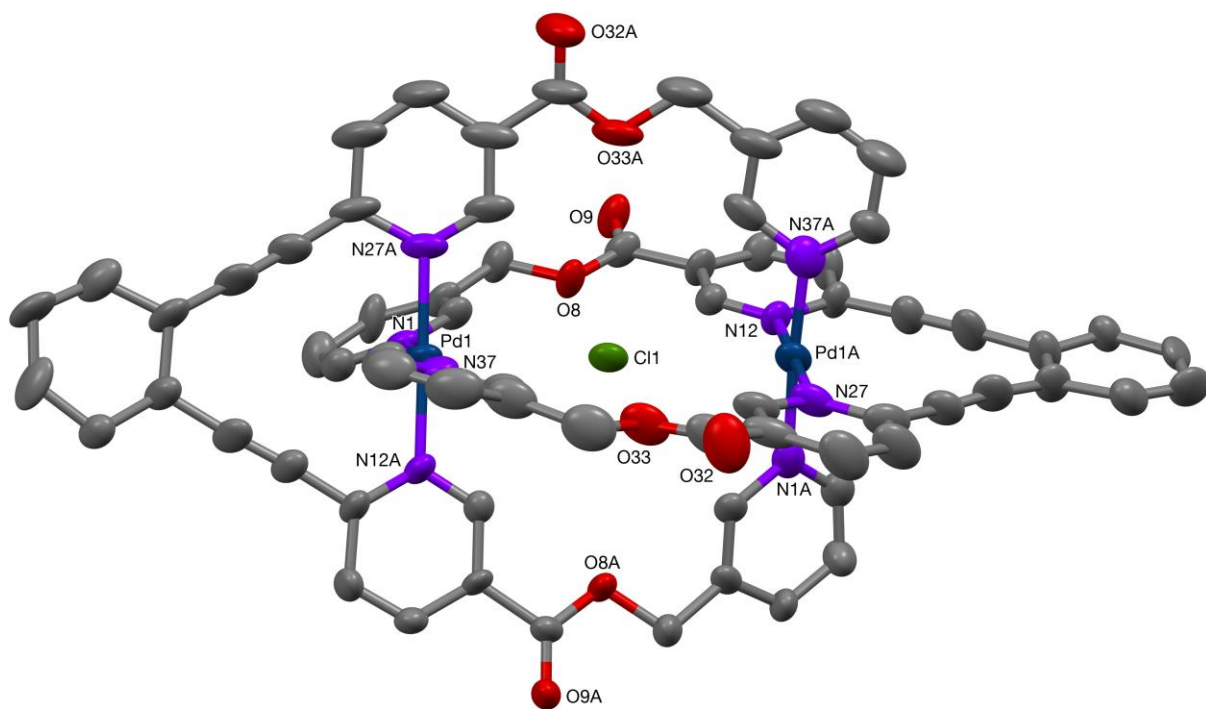

Figure S173 The crystal structure of the  $C_2$ -symmetric complex  $Cp^*4$  showing the encapsulated chloride anion (20% probability ellipsoids).

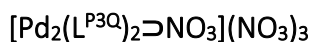

$\text{L}^{\text{P}3\text{Q}}$  (12.0 mg, 20  $\mu\text{mol}$ ) and  $\text{Pd}(\text{NO}_3)_2 \cdot 2\text{H}_2\text{O}$  (5.3 mg, 20  $\mu\text{mol}$ ) were sonicated in  $d_6$ -DMSO (0.75 mL) until a homogenous solution was obtained. After standing at 50 °C for 2 h,  $^1\text{H}$  NMR showed quantitative conversion to  $[\text{Pd}_2(\text{L}^{\text{P}3\text{Q}})_2](\text{NO}_3)_4$ . The solution was diluted with  $\text{CH}_3\text{CN}$  (0.75 mL), filtered through celite and left vapour diffusion of  $\text{Et}_2\text{O}$ , from which X-ray quality crystals were obtained.

*Crystal data for  $\text{C}^{\text{P}3\text{Q}}$ :*  $[\text{C}_{76}\text{H}_{48}\text{N}_8\text{O}_8\text{Pd}_2](\text{NO}_3)_4 \cdot 3(\text{C}_2\text{H}_6\text{OS})$ ,  $M = 1896.44$ , monoclinic,  $I2/a$  (no. 15),  $a = 24.9892(14)$ ,  $b = 10.3668(5)$ ,  $c = 33.204(2)$  Å,  $\beta = 110.848(7)^\circ$ ,  $V = 8038.6(8)$  Å<sup>3</sup>,  $Z = 4$  [ $\text{C}_2$  symmetry],  $D_c = 1.567$  g cm<sup>-3</sup>,  $\mu(\text{Cu-K}\alpha) = 5.065$  mm<sup>-1</sup>,  $T = 173$  K, pale yellow platy needles, Agilent Xcalibur PX Ultra A diffractometer; 7730 independent measured reflections ( $R_{\text{int}} = 0.0490$ ),  $F^2$  refinement,<sup>[5,6,7]</sup>  $R_1(\text{obs}) = 0.0557$ ,  $wR_2(\text{all}) = 0.1683$ , 4750 independent observed absorption-corrected reflections [ $|F_o| > 4\sigma(|F_o|)$ ], completeness to  $\theta_{\text{full}}(67.7^\circ) = 98.6\%$ , 479 parameters. CCDC 2202607.

The structure of  $\text{C}^{\text{P}3\text{Q}}$  was found to sit across a  $\text{C}_2$  axis that passes through the N50 and O52 atoms of the encapsulated nitrate anion, and bisects the O33...O33A vector. Three of the four expected nitrate anions per complex were reliably located, but the fourth could not be found and so has been presumed to be somewhere amongst the highly disordered solvent. The best approach to handling this diffuse electron density was found to be the SQUEEZE routine of PLATON.<sup>[8]</sup> This suggested a total of 607 electrons per unit cell, equivalent to 151.75 electrons per complex. Accounting for the electron density of the presumed "missing" nitrate anion ( $\text{NO}_3$ , 31 electrons) leaves  $151.75 - 31 = 120.75$  electrons for the solvent. Before the use of SQUEEZE the solvent most resembled dimethylsulphoxide ( $\text{C}_2\text{H}_6\text{OS}$ , 42 electrons), and 3 dimethylsulphoxide molecules corresponds to 126 electrons, so this was used as the solvent present. As a result, the atom list for the asymmetric unit is low by  $0.5 \times [\text{NO}_3 + 3(\text{C}_2\text{H}_6\text{SO})] = \text{C}_3\text{H}_9\text{N}_{0.5}\text{O}_3\text{S}_{1.5}$  (and that for the unit cell low by  $\text{C}_{24}\text{H}_{72}\text{N}_4\text{O}_{24}\text{S}_{12}$ ) compared to what is actually presumed to be present.

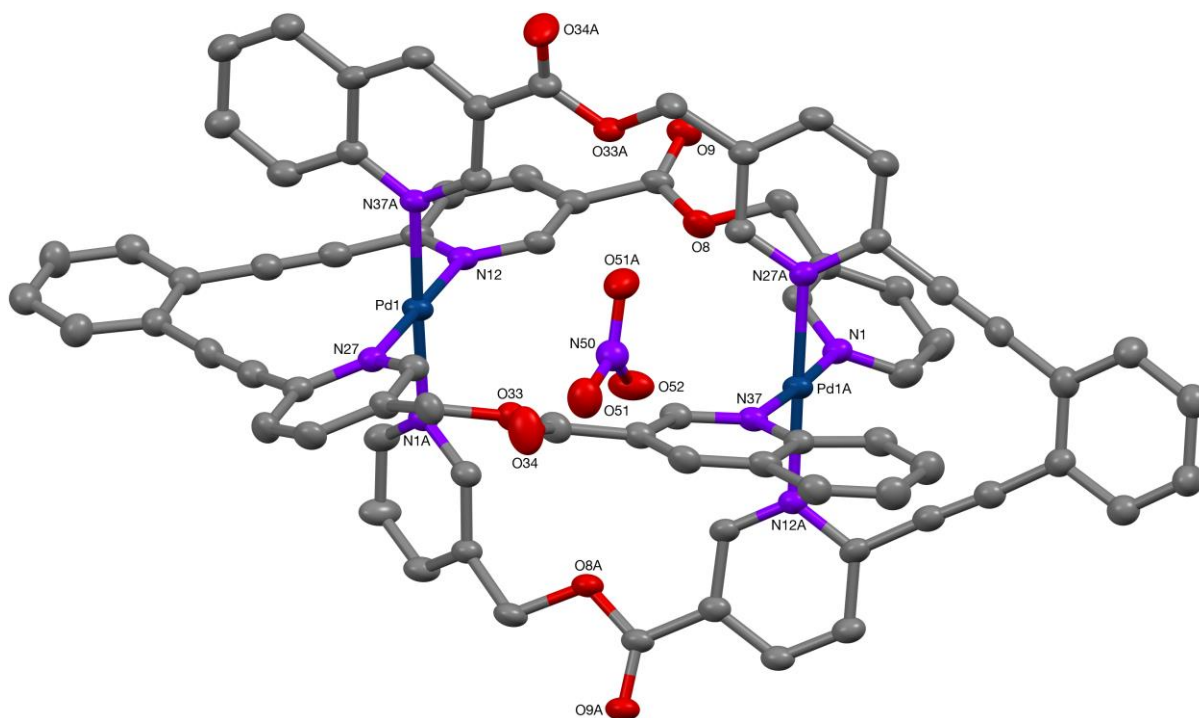

Figure S174 The crystal structure of the  $\text{C}_2$ -symmetric complex  $\text{C}^{\text{P}3\text{Q}}$  showing the encapsulated nitrate anion (20% probability ellipsoids).

## 6. Chirality Assignment in $C^{P3Q}$

Priorities for the pairs of *trans*-coordinating units were assigned using CIP priority rules. These are indicated below with the higher priority shown in blue, the lower in orange. Using these, the axial chirality of each Pd(II) centre was assigned. The cage was found to crystallise as a racemic mixture of (*S,S*)- and (*R,R*)- $C^{P3Q}$  enantiomers (shown in pink and green, respectively).

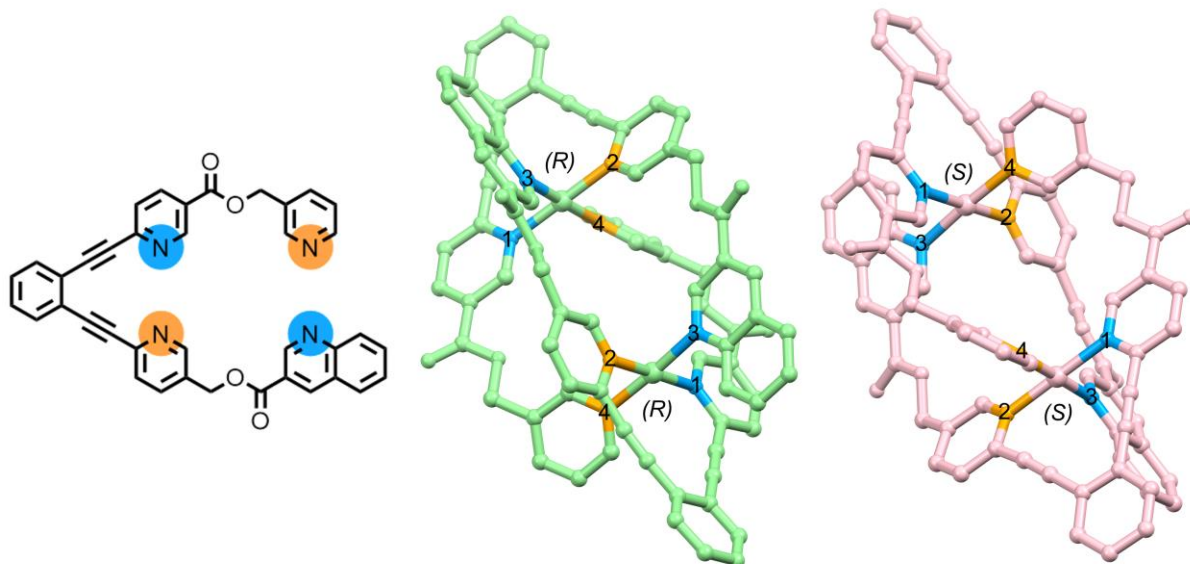

Figure S175 Chirality assignment for the (*S,S*)- (shown in pink) and (*R,R*)- $C^{P3Q}$  (shown in green) cage enantiomers. For each of the two *trans*-heterobidentate coordinating pairs, the higher priority coordinating nitrogen atom is shown in blue, the lower in orange.

## 7. References

- [1] P. Reine, A. G. Campaña, L. Alvarez de Cienfuegos, V. Blanco, S. Abbate, A. J. Mota, G. Longhi, D. Miguel and J. M. Cuerva, *Chem. Commun.*, 2019, **55**, 10685-10688.
- [2] J. J. P. Stewart, *J. Mol. Model.*, 2007, **13**, 1173-1213.
- [3] Gaussian 16, Revision C.01, M. J. Frisch, G. W. Trucks, H. B. Schlegel, G. E. Scuseria, M. A. Robb, J. R. Cheeseman, G. Scalmani, V. Barone, G. A. Petersson, H. Nakatsuji, X. Li, M. Caricato, A. V. Marenich, J. Bloino, B. G. Janesko, R. Gomperts, B. Mennucci, H. P. Hratchian, J. V. Ortiz, A. F. Izmaylov, J. L. Sonnenberg, D. Williams-Young, F. Ding, F. Lipparini, F. Egidi, J. Goings, B. Peng, A. Petrone, T. Henderson, D. Ranasinghe, V. G. Zakrzewski, J. Gao, N. Rega, G. Zheng, W. Liang, M. Hada, M. Ehara, K. Toyota, R. Fukuda, J. Hasegawa, M. Ishida, T. Nakajima, Y. Honda, O. Kitao, H. Nakai, T. Vreven, K. Throssell, J. A. Montgomery, Jr., J. E. Peralta, F. Ogliaro, M. J. Bearpark, J. J. Heyd, E. N. Brothers, K. N. Kudin, V. N. Staroverov, T. A. Keith, R. Kobayashi, J. Normand, K. Raghavachari, A. P. Rendell, J. C. Burant, S. S. Iyengar, J. Tomasi, M. Cossi, J. M. Millam, M. Klene, C. Adamo, R. Cammi, J. W. Ochterski, R. L. Martin, K. Morokuma, O. Farkas, J. B. Foresman, and D. J. Fox, Gaussian, Inc., Wallingford CT, 2016.
- [4] M. Holz, X. Mao, D. Seiferling and A. Sacco, *J. Chem. Phys.*, 1996, **104**, 669.
- [5] O. V. Dolomanov, L.J. Bourhis, R.J. Gildea, J.A.K. Howard, H. Puschmann, *J. Appl. Cryst.*, 2009, **42**, 339-341.
- [6] SHELXTL v5.1, Bruker AXS, Madison, WI, 1998.
- [7] SHELX-2013, G.M. Sheldrick, *Acta Cryst.*, 2015, **C71**, 3-8.
- [8] A.L. Spek (2003, 2009) PLATON, A Multipurpose Crystallographic Tool, Utrecht University, Utrecht, The Netherlands. See also A.L. Spek, *Acta Cryst.*, 2015, **C71**, 9-18.
